# Supplementary material for: Organocatalytic enantio- and diastereoselective assembly of cyclopropane-incorporated polycyclic molecules via isobenzopyrylium ions
Source: Royal Society of Chemistry journal article supplement (doi:10.1039/d4sc03746d), 2024-01-01
Supplement: d4sc03746d1.pdf [file d4sc03746d1.pdf]

Supporting Information

**Organocatalytic Enantio- and Diastereoselective Assembly of Cyclopropane-  
Incorporated Polycyclic Molecules via Isobenzopyrylium Ions**

Shuxuan Liu,<sup>ab</sup> Chaoshen Zhang,<sup>\*b</sup> Zhengyu Han,<sup>a</sup>

Hai Huang<sup>a</sup> and Jianwei Sun<sup>\*b</sup>

*<sup>a</sup>Jiangsu Key Laboratory of Advanced Catalytic Materials & Technology, School of  
Petrochemical Engineering, Changzhou University, Changzhou (China)*

*<sup>b</sup>Department of Chemistry and the Hong Kong Branch of Chinese National  
Engineering Research Centre for Tissue Restoration & Reconstruction, The Hong  
Kong University of Science and Technology, Clear Water Bay, Kowloon, Hong Kong  
SAR (China)*

**Table of Contents**

|                                                                   |             |
|-------------------------------------------------------------------|-------------|
| <b>I. General Information .....</b>                               | <b>S-2</b>  |
| <b>II. Preparation of Substrates.....</b>                         | <b>S-4</b>  |
| <b>IV. CPA-Catalyzed Synthesis of Bridged Cyclopropanes .....</b> | <b>S-13</b> |
| <b>IV Large-Scale Reaction.....</b>                               | <b>S-27</b> |
| <b>V. Product Derivatizations .....</b>                           | <b>S-28</b> |
| <b>VI. Product Structure Determination.....</b>                   | <b>S-30</b> |
| <b>VII. Computational Details .....</b>                           | <b>S-39</b> |
| <b>NMR Spectra and HPLC Traces</b>                                |             |

## I. General Information

Flash column chromatography was performed over silica gel (200-300 or 300-400 mesh) purchased from Qindao Haiyang Co., China or SiliCycle® Inc., Canada. All air or moisture sensitive reactions were conducted in oven-dried glassware under nitrogen atmosphere using anhydrous solvents. TLC was visualized by UV fluorescence (254 nm) then phosphomolybdic acid. Tetrahydrofuran was distilled from sodium/benzophenone. Anhydrous *N,N*-dimethyl formamide, dichloromethane, methanol, toluene, diethyl ether, acetonitrile, and *n*-hexane were purified by the Innovative® solvent purification system. Other anhydrous solvents were purchased from Sigma-Aldrich®, J&K® and Energy® and used as received. Chemicals were purchased from commercial suppliers, such as Sigma-Aldrich®, J&K®, Energy® and used without further purification unless otherwise stated. All the molecular sieves were purchased from Strem® Chemicals, and vacuum dry at 200 °C for 30 minutes. <sup>1</sup>H, <sup>13</sup>C, <sup>31</sup>P and <sup>19</sup>F NMR spectra were collected on a Bruker AV 400 and 300 MHz NMR spectrometers using residue solvent peaks as an internal standard (<sup>1</sup>H NMR: CDCl<sub>3</sub> at 7.26 ppm; <sup>13</sup>C NMR: CDCl<sub>3</sub> at 77.0 ppm) Data for <sup>1</sup>H NMR were recorded as follows: chemical shift (δ, ppm), multiplicity (s = singlet; d = doublet; t = triplet; q = quarter; p = pentet; sept = septet; m = multiplet; br = broad), coupling constant (Hz), integration. Mass spectra were collected on an Agilent GC/MS 5975C system, or a MALDI Micro MX mass spectrometer, or an API QSTAR XL System. Optical rotations were measured on Rudolph Research Analytical Autopol I automatic polarimeter with [α]<sub>D</sub> values reported in degrees; concentration (c) is in 10 mg/mL. The enantiomeric excess values were determined by chiral HPLC using an Agilent 1200 LC instrument or Agilent 1260 LC instrument with Daicel CHIRALPAK® AD-H, IC, IC-3 or CHIRALCEL® OD-H, OD-3 columns. Unless otherwise noted, the racemic

samples in this study were prepared using the racemic phosphoric acid catalyst 1,1'-binaphthyl-2,2'-diyl hydrogenphosphate.

## II. Preparation of Substrates

The isochromene substrates **1a**, **1b**, **1c**, **1d**, **1e**, **1f**, **1j**, **1p** are known compounds.<sup>1</sup> The procedure for the synthesis of other substrates is shown below. All vinylboronic acids used here are known compounds.<sup>2</sup>

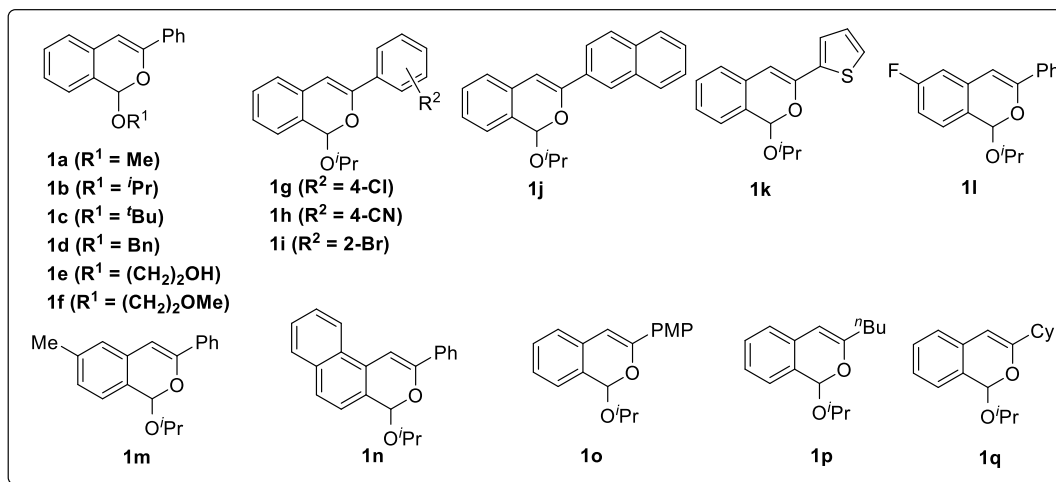

1. (a) H. Qian, W. Zhao, Z. Wang and J. Sun, *J. Am. Chem. Soc.*, 2015, **137**, 560–563. (b) Y. Liu and K. Jørgensen, *J. Am. Chem. Soc.*, 2021, **143**, 8208–8220. (c) M. Dell’Acqua, B. Castano, C. Cecchini, T. Pedrazzini, V. Pirovano, E. Rossi, A. Caselli and G. Abbiati, *J. Org. Chem.*, 2014, **79**, 3494–3505.
2. Y. Zhang, H. Liu, L. Tang and C. Feng, *J. Am. Chem. Soc.*, 2018, **140**, 10695–10699.

### General Procedure A.

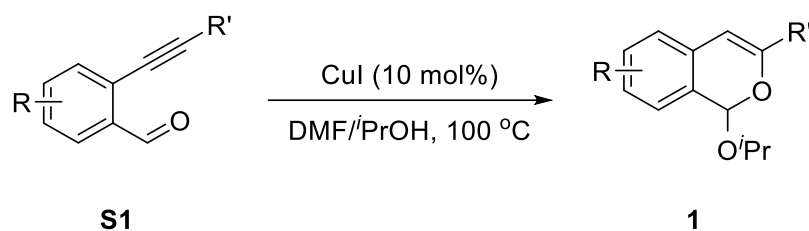

To an oven-dried 4-mL vial was added the aldehyde **S1** (1.0 mmol), DMF (0.5 mL), isopropanol (0.5 mL), and CuI (19.0 mg, 10 mol%). The reaction mixture was stirred at 100 °C, and the reaction progress was monitored by thin layer chromatography. Upon completion (~72 h), water (3 mL) was added. The mixture was extracted with ethyl acetate (3 × 5 mL). The combined organic layers were washed with water (10 mL) and then brine (10 mL), dried with NaSO<sub>4</sub>, filtered, and concentrated. The residue was purified by silica gel (pre-treated with Et<sub>3</sub>N) flash chromatography to afford the acetal (eluent for all the cases: *n*-hexane/EtOAc = 100:1).

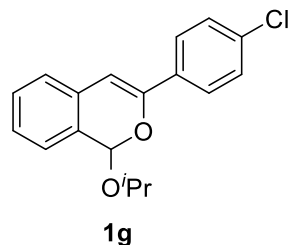

**3-(4-Chlorophenyl)-1-isopropoxy-1H-isochromene (1g)** was prepared according to the General Procedure A as a yellow solid (chromatography eluent: *n*-hexane/EtOAc = 50:1) in 49% yield (0.7 g).

<sup>1</sup>H NMR (400 MHz, CDCl<sub>3</sub>) δ 7.72 (d, *J* = 8.4 Hz, 1H), 7.38 – 7.32 (m, 3H), 7.28 – 7.19 (m, 3H), 6.58 (s, 1H), 6.29 (s, 1H), 4.34 (hept, *J* = 6.0 Hz, 1H), 1.31 (d, *J* = 6.0 Hz, 3H), 1.16 (d, *J* = 6.0 Hz, 3H).

<sup>13</sup>C NMR (101 MHz, CDCl<sub>3</sub>) δ 148.3, 134.3, 133.2, 130.0, 129.2, 128.6, 127.5, 126.9, 126.0, 125.5, 124.6, 100.7, 96.9, 70.0, 23.5, 21.9.

HRMS (CI<sup>+</sup>) Calcd for C<sub>18</sub>H<sub>17</sub>ClO<sub>2</sub> [M]: 300.0917, Found: 300.0918.

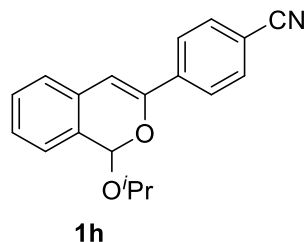

**4-(1-Isopropoxy-1H-isochromen-3-yl)benzonitrile (1h)** was prepared according to the General Procedure A as a yellow solid (chromatography eluent: *n*-hexane/EtOAc = 50:1) in 62% yield (0.9 g).

<sup>1</sup>H NMR (400 MHz, CDCl<sub>3</sub>) δ 7.86 (d, *J* = 8.4 Hz, 2H), 7.66 (d, *J* = 8.4 Hz, 2H), 7.38 – 7.28 (m, 2H), 7.25 – 7.21 (m, 2H), 6.71 (s, 1H), 6.30 (s, 1H), 4.32 (hept, *J* = 6.0 Hz, 1H), 1.30 (d, *J* = 6.0 Hz, 3H), 1.14 (d, *J* = 6.0 Hz, 3H).

<sup>13</sup>C NMR (101 MHz, CDCl<sub>3</sub>) δ 147.3, 138.9, 132.2, 129.4, 129.3, 127.8, 127.6, 125.6, 125.0, 124.9, 118.8, 111.5, 103.3, 97.0, 70.2, 23.5, 21.9.

HRMS (CI<sup>+</sup>) Calcd for C<sub>19</sub>H<sub>17</sub>NO<sub>2</sub><sup>+</sup> [M]<sup>+</sup>: 291.1254, Found: 291.1251.

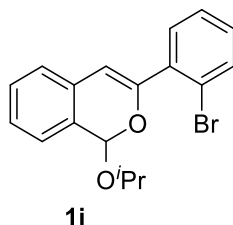

**3-(2-Bromophenyl)-1-isopropoxy-1H-isochromene (1i)** was prepared according to the General Procedure A as a yellow solid (chromatography eluent: *n*-hexane/EtOAc = 50:1) in 67% yield (2.3 g).

<sup>1</sup>H NMR (400 MHz, CDCl<sub>3</sub>) δ 7.60 (dd, *J*<sub>1</sub> = 8.0 Hz, *J*<sub>2</sub> = 0.8 Hz, 1H), 7.51 (dd, *J*<sub>1</sub> = 7.6 Hz, *J*<sub>2</sub> = 1.6 Hz, 1H), 7.32 – 7.20 (m, 4H), 7.17 – 7.13 (m, 2H), 6.33 (s, 1H), 6.28 (s, 1H), 4.30 (hept, *J* = 6.0 Hz, 1H), 1.27 (d, *J* = 6.0 Hz, 3H), 1.21 (d, *J* = 6.0 Hz, 3H).

<sup>13</sup>C NMR (101 MHz, CDCl<sub>3</sub>) δ 149.5, 136.6, 133.4, 130.5, 129.8, 129.7, 129.0, 127.2, 127.1, 126.9, 125.4, 124.4, 121.8, 105.5, 97.1, 69.8, 23.4, 21.7.

HRMS (CI+) Calcd for C<sub>18</sub>H<sub>17</sub>BrO<sub>2</sub> [M]: 344.0412, Found: 344.0414.

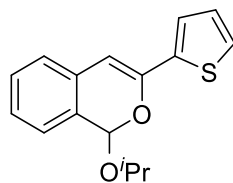

1k

**1-Isopropoxy-3-(thiophen-2-yl)-1H-isochromene (1k)** was prepared according to the General Procedure A as a brown solid (chromatography eluent: *n*-hexane/EtOAc = 50:1) in 40% yield (1.1 g).

<sup>1</sup>H NMR (300 MHz, CDCl<sub>3</sub>) δ 7.40 (dd, *J*<sub>1</sub> = 3.6 Hz, *J*<sub>2</sub> = 1.2 Hz, 1H), 7.34 – 7.15 (m, 5H), 7.06 – 7.03 (m, 1H), 6.46 (s, 1H), 6.24 (s, 1H), 4.36 (hept, *J* = 6.3 Hz, 1H), 1.30 (d, *J* = 6.0 Hz, 3H), 1.21 (d, *J* = 6.3 Hz, 3H).

<sup>13</sup>C NMR (101 MHz, CDCl<sub>3</sub>) δ 145.3, 139.2, 130.0, 129.1, 127.6, 127.5, 126.4, 125.53, 125.48, 124.3, 123.9, 99.6, 97.1, 70.0, 23.6, 21.9.

HRMS (CI+) Calcd for C<sub>16</sub>H<sub>16</sub>O<sub>2</sub>S [M]: 272.0871, Found: 272.0872.

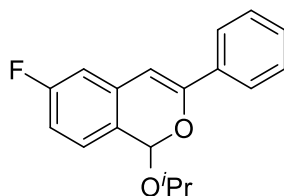

1l

**6-Fluoro-1-isopropoxy-3-phenyl-1H-isochromene (1l)** was prepared according to the General Procedure A as a yellow solid (chromatography eluent: *n*-hexane/EtOAc = 50:1) in 65% yield (0.9 g).

<sup>1</sup>H NMR (400 MHz, CDCl<sub>3</sub>) δ 7.78 (d, *J* = 7.6 Hz, 2H), 7.43 – 7.34 (m, 3H), 7.21 – 7.18 (m, 1H), 6.95 – 6.87 (m, 2H), 6.54 (s, 1H), 6.29 (s, 1H), 4.36 (hept, *J* = 6.4 Hz, 1H), 1.31 (d, *J* = 6.0 Hz, 3H), 1.17 (d, *J* = 6.4 Hz, 3H).

$^{13}\text{C}$  NMR (101 MHz,  $\text{CDCl}_3$ )  $\delta$  163.2 (d,  $J = 244.3$  Hz), 150.4, 134.3, 132.6 (d,  $J = 9.2$  Hz), 129.0, 128.4, 127.4 (d,  $J = 9.2$  Hz), 125.0, 123.5 (d,  $J = 2.6$  Hz), 113.4 (d,  $J = 22.4$  Hz), 110.7 (d,  $J = 22.3$  Hz), 99.7 (d,  $J = 2.5$  Hz), 96.5, 69.9, 23.5, 21.9.

$^{19}\text{F}$  NMR (376 MHz,  $\text{CDCl}_3$ )  $\delta$  -112.9.

HRMS (CI+) Calcd for  $\text{C}_{18}\text{H}_{17}\text{FO}_2$  [M]: 284.1213, Found: 284.1218.

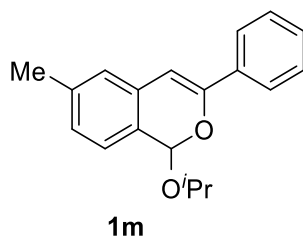

**1-Isopropoxy-6-methyl-3-phenyl-1H-isochromene (1m)** was prepared according to the General Procedure A as a white solid (chromatography eluent: *n*-hexane/EtOAc = 50:1) in 75% yield (2.1 g).

$^1\text{H}$  NMR (400 MHz,  $\text{CDCl}_3$ )  $\delta$  7.79 – 7.76 (m, 2H), 7.39 – 7.29 (m, 3H), 7.11 – 7.00 (m, 3H), 6.54 (s, 1H), 6.26 (s, 1H), 4.33 (hept,  $J = 6.4$  Hz, 1H), 2.33 (s, 3H), 1.28 (d,  $J = 6.0$  Hz, 3H), 1.15 (d,  $J = 6.4$  Hz, 3H).

$^{13}\text{C}$  NMR (101 MHz,  $\text{CDCl}_3$ )  $\delta$  149.3, 138.8, 134.8, 130.2, 128.5, 128.3, 127.4, 125.3, 124.98, 124.96, 124.8, 100.3, 96.8, 69.6, 23.5, 21.9, 21.3.

HRMS (CI+) Calcd for  $\text{C}_{19}\text{H}_{20}\text{O}_2$  [M]: 280.1463, Found: 280.1467.

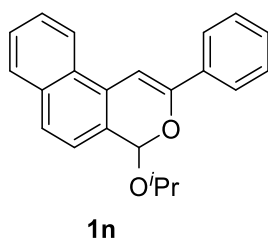

**4-Isopropoxy-2-phenyl-4H-benzo[f]isochromene (1n)** was prepared according to the General Procedure A as a yellow solid (chromatography eluent: *n*-hexane/EtOAc = 50:1) in 66% yield (1.8 g).



$^1\text{H NMR}$  (400 MHz,  $\text{CDCl}_3$ )  $\delta$  8.24 (d,  $J = 8.4$  Hz, 1H), 7.91 – 7.89 (m, 2H), 7.81 – 7.79 (m, 1H), 7.71 (d,  $J = 8.4$  Hz, 1H), 7.55 – 7.27 (m, 7H), 6.42 (s, 1H), 4.39 (hept,  $J = 6.0$  Hz, 1H), 1.31 (d,  $J = 6.0$  Hz, 3H), 1.18 (d,  $J = 6.4$  Hz, 3H).

$^{13}\text{C NMR}$  (101 MHz,  $\text{CDCl}_3$ )  $\delta$  150.3, 134.9, 133.9, 128.7, 128.5, 128.4, 128.0, 126.8, 126.5, 126.2, 126.1, 125.0, 123.6, 123.4, 122.9, 97.4, 96.0, 69.8, 23.6, 22.0.

**HRMS** (CI+) Calcd for  $\text{C}_{22}\text{H}_{20}\text{O}_2$  [M]: 316.1463, Found: 316.1463.

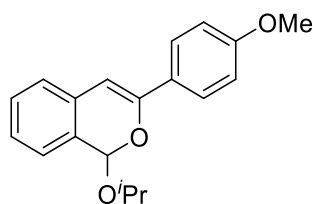

**1o**

**1-Isopropoxy-3-(4-methoxyphenyl)-1H-isochromene (1o)** was prepared according to the General Procedure A as a white solid (chromatography eluent: *n*-hexane/EtOAc = 50:1) in 52% yield (0.4 g).

$^1\text{H NMR}$  (400 MHz,  $\text{CDCl}_3$ )  $\delta$  7.76 (d,  $J = 7.6$  Hz, 2H), 7.39 (t,  $J = 7.6$  Hz, 2H), 7.32 (d,  $J = 7.2$  Hz, 1H), 7.15 (d,  $J = 8.4$  Hz, 1H), 6.90 (dd,  $J_1 = 8.4$  Hz,  $J_2 = 2.4$  Hz, 1H), 6.78 (d,  $J = 2.4$  Hz, 1H), 6.57 (s, 1H), 6.25 (s, 1H), 4.36 (hept,  $J = 6.0$  Hz, 1H), 3.83 (s, 3H), 1.32 (d,  $J = 6.4$  Hz, 3H), 1.17 (d,  $J = 6.0$  Hz, 3H).

$^{13}\text{C NMR}$  (101 MHz,  $\text{CDCl}_3$ )  $\delta$  147.5, 134.9, 129.0, 128.4 (2C), 128.2, 125.9, 124.5, 123.5, 115.2, 110.8, 100.1, 96.8, 69.7, 55.5, 23.5, 21.9.

**HRMS** (CI+) Calcd for  $\text{C}_{22}\text{H}_{20}\text{O}_2$  [M]: 296.1412, Found: 296.1407.

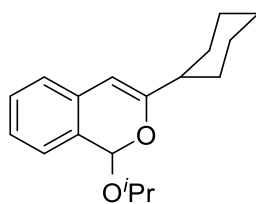

**1q**

**3-Cyclohexyl-1-isopropoxy-1H-isochromene (1q)** was prepared according to the General Procedure A as a yellow solid (chromatography eluent: *n*-hexane/EtOAc = 50:1) in 88% yield (1.2 g).

$^1\text{H NMR}$  (400 MHz,  $\text{CDCl}_3$ )  $\delta$  7.27 – 7.23 (m, 1H), 7.18 – 7.11 (m, 2H), 7.03 (d,  $J$  = 7.6 Hz, 1H), 6.10 (s, 1H), 5.74 (s, 1H), 4.26 (hept,  $J$  = 6.4 Hz, 1H), 2.19 – 2.13 (m, 1H), 1.97 – 1.94 (m, 2H), 1.82 – 1.80 (m, 2H), 1.72 – 1.69 (m, 1H), 1.40 – 1.27 (m, 8H), 1.20 (d,  $J$  = 6.4 Hz, 3H).

$^{13}\text{C NMR}$  (101 MHz,  $\text{CDCl}_3$ )  $\delta$  158.4, 130.5, 128.9, 126.8, 125.7, 125.5, 123.7, 97.9, 96.1, 68.8, 42.3, 30.8, 30.5, 26.23, 26.16, 23.4, 21.6.

**HRMS** (CI+) Calcd for  $\text{C}_{18}\text{H}_{24}\text{O}_2$  [M]: 272.1776, Found: 272.1773.

### III. Synthesis of Catalyst (R)-A8

The CPA catalyst (R)-A8 was prepared by following the literature procedure.<sup>3</sup>

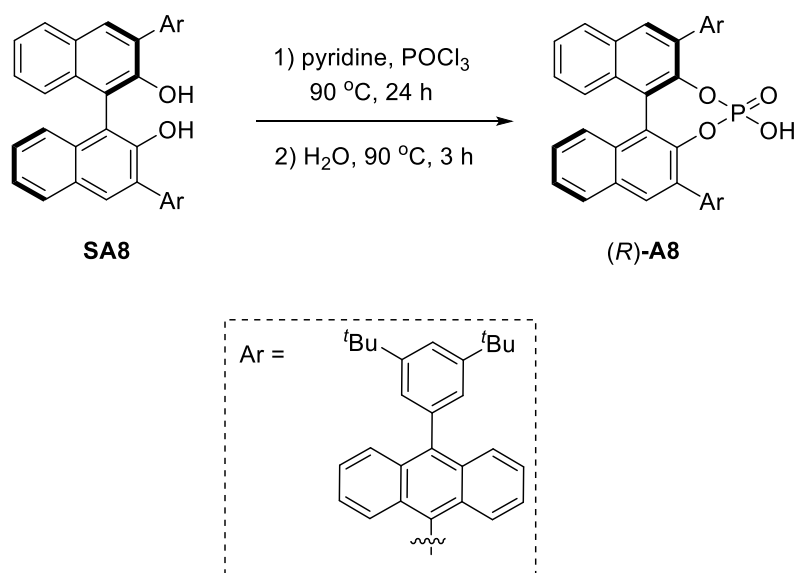

**(R)-2,6-Bis(10-(3,5-di-tert-butylphenyl)anthracen-9-yl)-4-hydroxydinaphtho [2,1-d:1',2'-f][1,3,2]dioxaphosphepine 4-oxide (A8).** At room temperature, to a 100-mL round-bottom flask charged with the substituted binaphthol SA8 (1.2 g, 1.2 mmol) was added anhydrous pyridine (20 mL). The flask was cooled to 0 °C, and POCl<sub>3</sub> (1.8 g, 12.0 mmol, 10.0 equiv) was slowly added. The mixture was heated at 90 °C for 24 h and then cooled to room temperature. Water (5.0 mL) was cautiously added and then the mixture was heated again at 90 °C for 3 h. The mixture was cooled to room temperature and then poured into an aqueous HCl solution (1 N, 50 mL) and extracted with DCM (50 mL × 3). The combined organic layers were sequentially washed with an aqueous HCl solution (1 N, 50 mL × 3), brine (50 mL), dried with anhydrous Na<sub>2</sub>SO<sub>4</sub>, filtered, and concentrated *in vacuo*. The residue was purified by silica gel column

3. W. Guo, Y. Luo, H. Sung, I. D. Williams, P. Li and J. Sun, *J. Am. Chem. Soc.*, 2020, **142**, 14384–14390.

chromatography (eluent: DCM/MeOH = 50:1 → 20:1) to afford the desired product. The pure product was redissolved in DCM (50 mL), and vigorously washed with an aqueous HCl solution (4 N, 50 mL × 3) to acidify the phosphoric acid and remove salt impurities. Finally, the organic layer was dried over Na<sub>2</sub>SO<sub>4</sub>, filtered, and concentrated *in vacuo* to furnish the phosphoric acid **A8** as a light yellow solid (1.5 g, 85% yield).

$[\alpha]_{\text{D}}^{23}$ : +0.9 (c = 1.0, CH<sub>2</sub>Cl<sub>2</sub>).

<sup>1</sup>H NMR (400 MHz, CDCl<sub>3</sub>) δ 8.08 (s, 2H), 8.00 (d, *J* = 8.0 Hz, 2H), 7.80 – 7.74 (m, 4H), 7.69 – 7.60 (m, 8H), 7.54 – 7.50 (m, 4H), 7.28 – 7.23 (m, 8H), 7.17 – 7.10 (m, 4H), 4.09 (s, 6H), 1.38 (s, 18H), 1.26 (s, 18H).

<sup>13</sup>C NMR (101 MHz, CDCl<sub>3</sub>) δ 150.7, 150.6, 146.8, 146.7, 139.6, 138.0, 134.3, 132.9, 131.7, 131.44, 131.41, 131.1, 130.8, 130.3, 130.1, 129.8, 128.7, 128.1, 127.63, 127.55, 127.1, 126.9, 126.4, 126.3, 125.8, 124.9, 124.7, 122.6, 121.0, 35.1, 35.0, 31.8, 31.7.

<sup>31</sup>P NMR (162 MHz, CDCl<sub>3</sub>) δ 2.2.

HRMS (ES-) Calcd for C<sub>76</sub>H<sub>68</sub>O<sub>4</sub>P<sup>-</sup> [M - H]: 1075.4860, Found: 1075.4854.

## IV. CPA-Catalyzed Synthesis of Bridged Cyclopropanes

### General Procedure B.

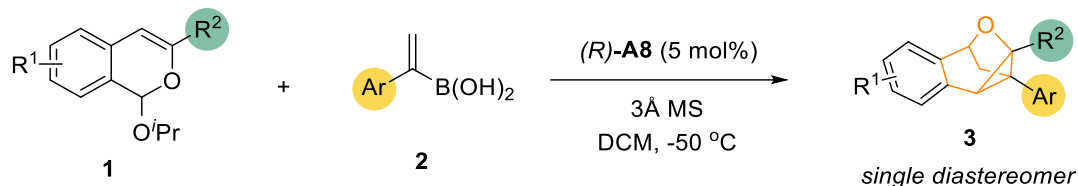

At  $-50\text{ }^{\circ}\text{C}$ , to a solution of 3Å molecular sieves (30.0 mg),  $(R)$ -**A8** (16.1 mg, 0.015 mmol, 5 mol%) and vinylboronic acid **2** (0.75 mmol) in DCM (1.5 mL) in a 4-mL vial was added acetal **1** (0.30 mmol). The reaction mixture was stirred at  $-50\text{ }^{\circ}\text{C}$  under  $\text{N}_2$  atmosphere for 96 h. The reaction mixture was quenched by  $\text{Et}_3\text{N}$  (1 drop) and transferred to a flask with DCM (10 mL) and concentrated. Then the residue was directly purified by silica gel column chromatography to afford the desired product **3**.

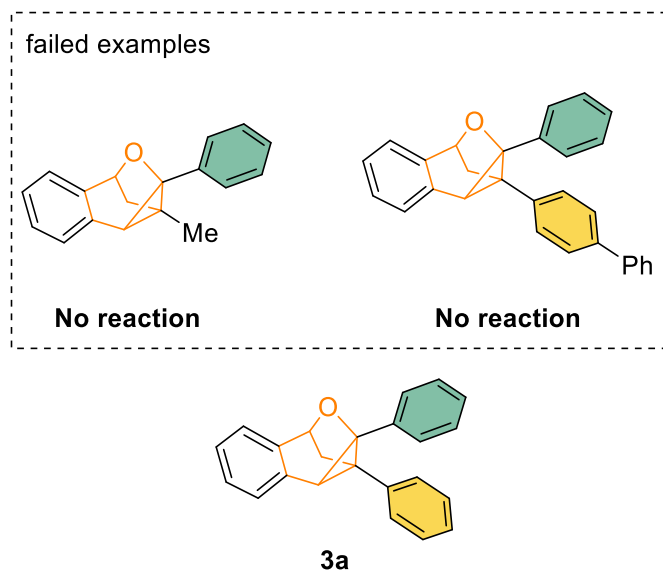

(1*S*,3*S*,7*bS*)-1,1a-Diphenyl-1a,2,3,7*b*-tetrahydro-1*H*-1,3-epoxycyclopropa [*a*]naphthalene (**3a**) was prepared according to the General Procedure B as a white solid (chromatography eluent: *n*-hexane/EtOAc = 100:1) in 78% yield (72.3 mg, 96% ee).

$[\alpha]_D^{23}$ : +129.2 ( $c = 1.0$ ,  $\text{CH}_2\text{Cl}_2$ ). HPLC analysis of the product: Daicel CHIRALPAK<sup>®</sup> IC column; 2%  $i$ PrOH in  $n$ -hexane; 1.0 mL/min; retention times: 8.1 min (major), 7.0 min (minor).

$^1\text{H NMR}$  (400 MHz,  $\text{CDCl}_3$ )  $\delta$  7.46 (d,  $J = 7.2$  Hz, 1H), 7.36 – 7.32 (m, 1H), 7.27 – 7.16 (m, 12H), 5.32 (d,  $J = 6.0$  Hz, 1H), 3.22 (s, 1H), 2.66 – 2.61 (m, 1H), 1.73 (d,  $J = 11.6$  Hz, 1H).

$^{13}\text{C NMR}$  (101 MHz,  $\text{CDCl}_3$ )  $\delta$  137.4, 135.6, 135.3, 132.2, 128.9, 128.4, 127.91, 127.85, 126.9, 126.8, 126.7, 126.3, 125.3, 122.3, 74.8, 68.5, 37.1, 35.7, 31.8.

HRMS (CI+) Calcd for  $\text{C}_{23}\text{H}_{18}\text{O}$  [M]: 310.1358, Found: 310.1362.

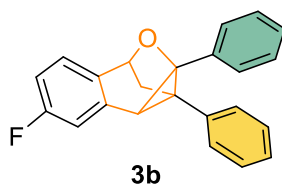

**(1S,1aR,3R)-6-Fluoro-1,1a-diphenyl-1a,2,3,7b-tetrahydro-1H-1,3-epoxycyclopropa[a]naphthalene (3b)** was prepared according to the General Procedure B as a white solid (chromatography eluent:  $n$ -hexane/EtOAc = 100:1) in 64% yield (61.5 mg, 96% ee).

$[\alpha]_D^{23}$ : +45.0 ( $c = 1.0$ ,  $\text{CH}_2\text{Cl}_2$ ). HPLC analysis of the product: Daicel CHIRALPAK<sup>®</sup> IC column; 2%  $i$ PrOH in  $n$ -hexane; 1.0 mL/min; retention times: 6.3 min (major), 5.8 min (minor).

$^1\text{H NMR}$  (400 MHz,  $\text{CDCl}_3$ )  $\delta$  7.26 – 7.15 (m, 12H), 6.95 – 6.90 (m, 1H), 5.31 (d,  $J = 6.0$  Hz, 1H), 3.18 (s, 1H), 2.65 (dd,  $J_1 = 11.6$  Hz,  $J_2 = 6.0$  Hz, 1H), 1.72 (d,  $J = 12.0$  Hz, 1H).

$^{13}\text{C NMR}$  (101 MHz,  $\text{CDCl}_3$ )  $\delta$  162.6 (d,  $J = 243.0$  Hz), 136.9, 134.9, 134.4 (d,  $J = 9.0$  Hz), 131.5 (d,  $J = 3.0$  Hz), 128.8, 128.4, 127.9, 127.1, 126.8, 126.3, 123.9 (d,  $J = 8.0$  Hz), 113.8 (d,  $J = 22.4$  Hz), 111.9 (d,  $J = 21.0$  Hz), 74.2, 68.5, 37.3, 35.9, 31.9 (d,  $J = 2.0$  Hz).

HRMS (CI+) Calcd for  $\text{C}_{23}\text{H}_{17}\text{FO}$  [M]: 328.1263, Found: 328.1264.

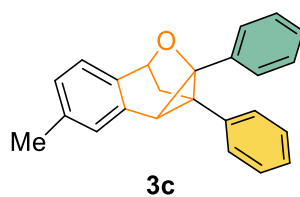

**(1S,3S,7bS)-6-Methyl-1,1a-diphenyl-1a,2,3,7b-tetrahydro-1H-1,3-epoxycyclopropa[a]naphthalene (3c)** was prepared according to the General Procedure B as a yellow solid (chromatography eluent: *n*-hexane/EtOAc = 100:1) in 48% yield (40.3 mg, 99% ee).

$[\alpha]_D^{23}$ : +78.8 (*c* = 1.0, CH<sub>2</sub>Cl<sub>2</sub>). HPLC analysis of the product: Daicel CHIRALPAK® IC column; 2% *i*PrOH in *n*-hexane; 1.0 mL/min; retention times: 8.6 min (major), 8.0 min (minor).

<sup>1</sup>H NMR (400 MHz, CDCl<sub>3</sub>) δ 7.27 (s, 1H), 7.26 – 7.13 (m, 11H), 7.06 – 7.04 (m, 1H), 5.29 (d, *J* = 6.0 Hz, 1H), 3.16 (s, 1H), 2.64 – 2.60 (m, 1H), 2.39 (s, 1H), 1.73 (d, *J* = 12.0 Hz, 1H).

<sup>13</sup>C NMR (101 MHz, CDCl<sub>3</sub>) δ 137.6, 137.5, 135.4, 132.9, 132.1, 128.9, 128.4, 127.8, 127.4, 126.8, 126.6, 126.3, 125.9, 122.2, 74.6, 68.5, 37.5, 35.8, 31.8, 21.5.

HRMS (CI<sup>+</sup>) Calcd for C<sub>24</sub>H<sub>20</sub>O [M]: 324.1514, Found: 324.1507.

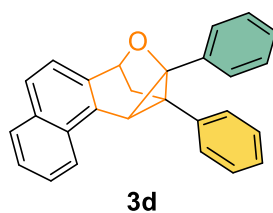

**1,1a-Diphenyl-1a,2,3,9c-tetrahydro-1H-1,3-epoxycyclopropa[c]phenanthrene (3d)** was prepared according to the General Procedure B as a yellow solid (chromatography eluent: *n*-hexane/EtOAc = 100:1) in 67% yield (72.4 mg, 97% ee).

$[\alpha]_{\text{D}}^{23}$ : -4.9 ( $c = 1.0$ ,  $\text{CH}_2\text{Cl}_2$ ). HPLC analysis of the product: Daicel CHIRALPAK<sup>®</sup> IC column; 2% *i*PrOH in *n*-hexane; 1.0 mL/min; retention times: 7.5 min (major), 6.0 min (minor).

<sup>1</sup>H NMR (400 MHz,  $\text{CDCl}_3$ )  $\delta$  8.32 (d,  $J = 8.4$  Hz, 1H), 7.89 (d,  $J = 8.4$  Hz, 1H), 7.73 (d,  $J = 8.0$  Hz, 1H), 7.57 (t,  $J = 7.2$  Hz, 1H), 7.49 (t,  $J = 7.2$  Hz, 1H), 7.41 (d,  $J = 8.0$  Hz, 1H), 7.29 – 7.16 (m, 10H), 5.46 (d,  $J = 6.0$  Hz, 1H), 3.92 (s, 1H), 2.68 (dd,  $J_1 = 12.0$  Hz,  $J_2 = 6.0$  Hz, 1H), 1.73 (d,  $J = 11.6$  Hz, 1H).

<sup>13</sup>C NMR (75 MHz,  $\text{CDCl}_3$ )  $\delta$  137.4, 135.3, 133.5, 132.4, 130.9, 129.0 (2C), 128.5, 127.9, 127.8, 127.0, 126.8, 126.5, 126.1, 125.4, 125.2, 122.1, 121.6, 75.1, 68.7, 36.9, 35.7, 28.2.

HRMS (CI<sup>+</sup>) Calcd for  $\text{C}_{27}\text{H}_{20}\text{NaO}^+$   $[\text{M} + \text{Na}]^+$ : 383.1406, Found: 383.1411.

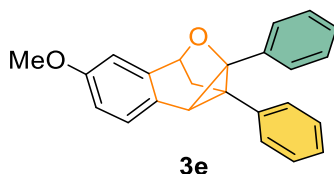

**(1S,3S,7bS)-5-Methoxy-1,1a-diphenyl-1a,2,3,7b-tetrahydro-1H-1,3-epoxycyclopropa[a]naphthalene (3e)** was prepared according to the General Procedure B as a white solid (chromatography eluent: *n*-hexane/EtOAc = 100:1) in 66% yield (58.4 mg, 99% ee).

$[\alpha]_{\text{D}}^{23}$ : +8.9 ( $c = 1.0$ ,  $\text{CH}_2\text{Cl}_2$ ). HPLC analysis of the product: Daicel CHIRALPAK<sup>®</sup> IC column; 2% *i*PrOH in *n*-hexane; 1.0 mL/min; retention times: 14.2 min (major).

<sup>1</sup>H NMR (400 MHz,  $\text{CDCl}_3$ )  $\delta$  7.34 (d,  $J = 8.0$  Hz, 1H), 7.25 – 7.15 (m, 10H), 6.90 – 6.88 (m, 1H), 6.83 (d,  $J = 2.4$  Hz, 1H), 5.26 (d,  $J = 6.0$  Hz, 1H), 3.81 (s, 3H), 3.16 (s, 1H), 2.62 (ddd,  $J_1 = 12.0$  Hz,  $J_2 = 6.4$  Hz,  $J_3 = 0.8$  Hz, 1H), 1.73 (d,  $J = 12.0$  Hz, 1H).

<sup>13</sup>C NMR (101 MHz,  $\text{CDCl}_3$ )  $\delta$  157.8, 137.5, 136.7, 135.4, 128.9, 128.3, 127.8, 127.6, 126.8, 126.6, 126.2, 124.3, 113.3, 108.6, 74.9, 68.4, 55.5, 37.2, 35.6, 31.0.



HRMS (CI+) Calcd for C<sub>24</sub>H<sub>20</sub>NaO<sub>2</sub><sup>+</sup> [M + Na]<sup>+</sup>: 363.1356, Found: 363.1362.

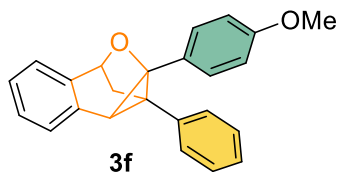

(1S,3S,7bS)-1-(4-Methoxyphenyl)-1a-phenyl-1a,2,3,7b-tetrahydro-1H-1,3-epoxycyclopropa[a]naphthalene (**3f**) was prepared according to the General Procedure B as a white solid (chromatography eluent: *n*-hexane/EtOAc = 100:1) in 87% yield (77.1 mg, 99% ee).

[ $\alpha$ ]<sub>D</sub><sup>23</sup>: +138.6 (c = 1.0, CH<sub>2</sub>Cl<sub>2</sub>). HPLC analysis of the product: Daicel CHIRALPAK<sup>®</sup> IC column; 2% *i*PrOH in *n*-hexane; 1.0 mL/min; retention times: 26.1 min (major), 16.0 min (minor).

<sup>1</sup>H NMR (400 MHz, CDCl<sub>3</sub>)  $\delta$  7.45 – 7.43 (m, 1H), 7.35 – 7.30 (m, 1H), 7.25 – 7.20 (m, 4H), 7.18 – 7.14 (m, 5H), 6.76 – 6.73 (m, 2H), 5.28 (d, *J* = 6.0 Hz, 1H), 3.71 (s, 3H), 3.16 (s, 1H), 2.66 (ddd, *J*<sub>1</sub> = 12.0 Hz, *J*<sub>2</sub> = 6.0 Hz, *J*<sub>3</sub> = 0.8 Hz, 1H), 1.71 (d, *J* = 11.6 Hz, 1H).

<sup>13</sup>C NMR (101 MHz, CDCl<sub>3</sub>)  $\delta$  158.7, 137.7, 135.7, 134.0, 132.3, 128.5, 128.3, 127.8, 126.9, 126.7, 126.4, 125.2, 122.3, 113.4, 74.7, 68.7, 55.1, 36.5, 34.7, 31.3.

HRMS (CI+) Calcd for C<sub>24</sub>H<sub>20</sub>O<sub>2</sub> [M]: 340.1463, Found: 340.1463.

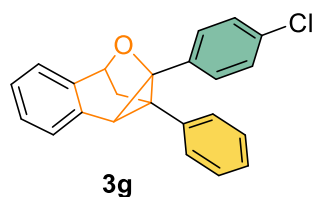

(1S,3S,7bS)-1-(4-Chlorophenyl)-1a-phenyl-1a,2,3,7b-tetrahydro-1H-1,3-epoxycyclopropa[a]naphthalene (**3g**) was prepared according to the General Procedure B as a yellow solid (chromatography eluent: *n*-hexane/EtOAc = 100:1) in 84% yield (75.7 mg, 99% ee).

$[\alpha]_{\text{D}}^{23}$ : +147.4 ( $c = 1.0$ ,  $\text{CH}_2\text{Cl}_2$ ). HPLC analysis of the product: Daicel CHIRALPAK<sup>®</sup> IC column; 2% *i*PrOH in *n*-hexane; 1.0 mL/min; retention times: 6.1 min (major), 5.8 min (minor).

<sup>1</sup>H NMR (400 MHz,  $\text{CDCl}_3$ )  $\delta$  7.45 (d,  $J = 7.6$  Hz, 1H), 7.36 – 7.33 (m, 1H), 7.28 – 7.23 (m, 4H), 7.22 – 7.14 (m, 5H), 7.11 – 7.08 (m, 2H), 5.31 (d,  $J = 6.0$  Hz, 1H), 3.18 (s, 1H), 2.61 (ddd,  $J_1 = 12.0$  Hz,  $J_2 = 6.0$  Hz,  $J_3 = 0.8$  Hz, 1H), 1.73 (d,  $J = 12.0$  Hz, 1H).

<sup>13</sup>C NMR (101 MHz,  $\text{CDCl}_3$ )  $\delta$  136.9, 135.5, 134.1, 132.6, 131.9, 129.0, 128.5, 128.0 (2C), 127.4, 126.9, 126.8, 125.5, 122.4, 74.9, 68.0, 37.2, 36.0, 31.8.

HRMS (CI<sup>+</sup>) Calcd for  $\text{C}_{23}\text{H}_{17}\text{ClO}$  [M]: 344.0968, Found: 344.0965.

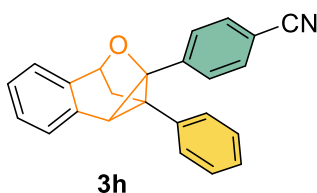

**4-((1S,3S,7bS)-1a-Phenyl-1a,2,3,7b-tetrahydro-1H-1,3-epoxycyclopropa[a]naphthalen-1-yl)benzonitrile (3h)** was prepared according to the General Procedure B (temperature:  $-35$  °C, catalyst loading: 10 mol%) as a white solid (chromatography eluent: *n*-hexane/EtOAc = 100:1) in 71% yield (71.1 mg, 93% ee).

$[\alpha]_{\text{D}}^{23}$ : +252.0 ( $c = 1.0$ ,  $\text{CH}_2\text{Cl}_2$ ). HPLC analysis of the product: Daicel CHIRALPAK<sup>®</sup> IC column; 5% *i*PrOH in *n*-hexane; 1.0 mL/min; retention times: 42.5 min (major), 19.9 min (minor).

<sup>1</sup>H NMR (400 MHz,  $\text{CDCl}_3$ )  $\delta$  7.47 – 7.43 (m, 3H), 7.37 (td,  $J_1 = 6.8$  Hz,  $J_2 = 2.4$  Hz, 1H), 7.31 – 7.25 (m, 5H), 7.21 – 7.18 (m, 4H), 5.37 (d,  $J = 6.0$  Hz, 1H), 3.26 (s, 1H), 2.61 (ddd,  $J_1 = 12.0$  Hz,  $J_2 = 6.0$  Hz,  $J_3 = 0.4$  Hz, 1H), 1.77 (d,  $J = 12.0$  Hz, 1H).

<sup>13</sup>C NMR (101 MHz,  $\text{CDCl}_3$ )  $\delta$  141.9, 136.2, 135.3, 131.5, 131.4, 129.3, 128.7, 128.2, 127.3, 126.9, 125.8 (2C), 122.5, 119.0, 110.0, 75.1, 67.8, 37.8, 37.6, 33.0.

HRMS (CI<sup>+</sup>) Calcd for  $\text{C}_{24}\text{H}_{18}\text{NO}^+$  [M + H]<sup>+</sup>: 336.1383, Found: 336.1397.

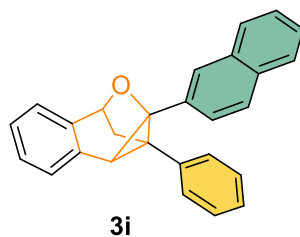

**(1S,1aR,3R)-1-(Naphthalen-2-yl)-1a-phenyl-1a,2,3,7b-tetrahydro-1H-1,3-epoxycyclopropa[a]naphthalene (3i)** was prepared according to the General Procedure B (temperature:  $-35\text{ }^{\circ}\text{C}$ , catalyst loading: 10 mol%) as a yellow solid (chromatography eluent: *n*-hexane/EtOAc = 100:1) in 69% yield (75.0 mg, 94% ee).

$[\alpha]_{\text{D}}^{23}$ : +139.9 ( $c = 1.0$ ,  $\text{CH}_2\text{Cl}_2$ ). HPLC analysis of the product: Daicel CHIRALPAK<sup>®</sup> IC column; 2% *i*PrOH in *n*-hexane; 1.0 mL/min; retention times: 13.5 min (major), 11.4 min (minor).

$^1\text{H NMR}$  (400 MHz,  $\text{CDCl}_3$ )  $\delta$  7.87 (d,  $J = 0.8$  Hz, 1H), 7.74 – 7.70 (m, 2H), 7.63 (d,  $J = 8.8$  Hz, 1H), 7.50 (d,  $J = 7.2$  Hz, 1H), 7.43 – 7.34 (m, 3H), 7.29 – 7.26 (m, 2H), 7.24 – 7.21 (m, 4H), 7.20 – 7.16 (m, 1H), 7.10 (dd,  $J_1 = 8.4$  Hz,  $J_2 = 1.6$  Hz, 1H), 5.39 (d,  $J = 6.0$  Hz, 1H), 3.36 (s, 1H), 2.70 (ddd,  $J_1 = 12.0$  Hz,  $J_2 = 6.0$  Hz,  $J_3 = 0.8$  Hz, 1H), 1.79 (d,  $J = 12.0$  Hz, 1H).

$^{13}\text{C NMR}$  (101 MHz,  $\text{CDCl}_3$ )  $\delta$  137.3, 135.7, 133.0, 132.9, 132.4, 132.2, 128.9, 128.4, 128.0, 127.8, 127.5, 127.4, 126.9, 126.7, 125.9, 125.6, 125.4 (2C), 124.2, 122.4, 75.0, 68.8, 37.3, 35.9, 32.0.

**HRMS** (CI+) Calcd for  $\text{C}_{27}\text{H}_{20}\text{O}$  [M]: 360.1514, Found: 360.1527.

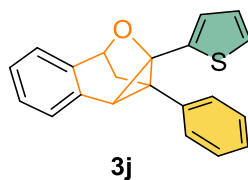

**(1R,1aR,3R)-1a-Phenyl-1-(thiophen-2-yl)-1a,2,3,7b-tetrahydro-1H-1,3-epoxycyclopropa[a]naphthalene (3j)** was prepared according to the General

Procedure B (temperature:  $-35\text{ }^{\circ}\text{C}$ , catalyst loading: 10 mol%) as a yellow solid (chromatography eluent: *n*-hexane/EtOAc = 100:1) in 52% yield (49.7 mg, 93% ee).

$[\alpha]_{\text{D}}^{23}$ : +132.9 ( $c = 1.0$ ,  $\text{CH}_2\text{Cl}_2$ ). HPLC analysis of the product: Daicel CHIRALPAK<sup>®</sup> IC column; 2% *i*PrOH in *n*-hexane; 1.0 mL/min; retention times: 13.3 min (major), 8.7 min (minor).

$^1\text{H NMR}$  (400 MHz,  $\text{CDCl}_3$ )  $\delta$  7.47 (d,  $J = 7.2$  Hz, 1H), 7.36 (td,  $J_1 = 7.2$  Hz,  $J_2 = 1.6$  Hz, 1H), 7.28 – 7.20 (m, 7H), 7.15 (d,  $J = 5.2$  Hz, 1H), 6.84 (dd,  $J_1 = 4.8$  Hz,  $J_2 = 3.6$  Hz, 1H), 6.68 – 6.67 (m, 1H), 5.31 (d,  $J = 6.0$  Hz, 1H), 3.22 (s, 1H), 2.69 (dd,  $J_1 = 12.0$  Hz,  $J_2 = 6.0$  Hz, 1H), 1.72 (d,  $J = 11.6$  Hz, 1H).

$^{13}\text{C NMR}$  (101 MHz,  $\text{CDCl}_3$ )  $\delta$  138.4, 136.9, 135.4, 131.7, 128.8, 128.4 (2C), 128.0, 126.9, 126.5, 125.5, 124.8, 124.3, 122.5, 75.3, 66.6, 36.5, 35.8, 32.4.

HRMS (CI<sup>+</sup>) Calcd for  $\text{C}_{21}\text{H}_{16}\text{OS}$  [M]: 316.0922, Found: 316.0924.

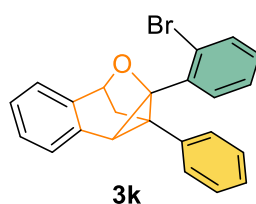

**(1R,1aR,3R)-1-(2-Bromophenyl)-1a-phenyl-1a,2,3,7b-tetrahydro-1H-1,3-epoxycyclopropa[a]naphthalene (3k)** was prepared according to the General Procedure B as a yellow oil (chromatography eluent: *n*-hexane/EtOAc = 100:1) in 57% yield (67.0 mg, 96% ee).

$[\alpha]_{\text{D}}^{23}$ : -41.9 ( $c = 1.0$ ,  $\text{CH}_2\text{Cl}_2$ ). HPLC analysis of the product: Daicel CHIRALPAK<sup>®</sup> IC column; 2% *i*PrOH in *n*-hexane; 1.0 mL/min; retention times: 14.5 min (major), 9.2 min (minor).

$^1\text{H NMR}$  (400 MHz,  $\text{CDCl}_3$ )  $\delta$  7.52 (dd,  $J_1 = 8.0$  Hz,  $J_2 = 1.2$  Hz, 1H), 7.47 – 7.44 (m, 2H), 7.34 (td,  $J_1 = 7.2$  Hz,  $J_2 = 2.0$  Hz, 1H), 7.29 – 7.13 (m, 7H), 6.98 – 6.96 (m, 2H), 5.32 (d,  $J = 6.0$  Hz, 1H), 3.17 (s, 1H), 3.05 – 3.01 (m, 1H), 1.78 (d,  $J = 11.6$  Hz, 1H).

$^{13}\text{C}$  NMR (101 MHz,  $\text{CDCl}_3$ )  $\delta$  138.4, 135.8, 133.53, 133.46, 132.9, 132.2, 130.4, 128.0, 127.9, 127.4, 127.2, 126.8, 125.8, 125.6, 125.4, 122.3, 75.3, 71.2, 33.1, 33.0, 32.4.

HRMS (CI<sup>+</sup>) Calcd for  $\text{C}_{23}\text{H}_{17}\text{BrO}$  [M]: 388.0463, Found: 388.0367.

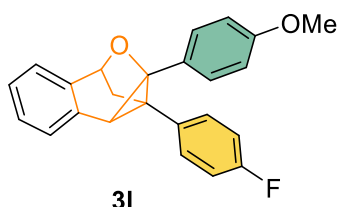

**(1S,3S,7bS)-1a-(4-Fluorophenyl)-1-(4-methoxyphenyl)-1a,2,3,7b-tetrahydro-1H-1,3-epoxycyclopropa[a]naphthalene (31)** was prepared according to the General Procedure B as a white solid (chromatography eluent: *n*-hexane/EtOAc = 100:1) in 72% yield (77.5 mg, 95% ee).

$[\alpha]_{\text{D}}^{23}$ : -0.2 (*c* = 1.0,  $\text{CH}_2\text{Cl}_2$ ). HPLC analysis of the product: Daicel CHIRALPAK<sup>®</sup> IC column; 2% *i*PrOH in *n*-hexane; 1.0 mL/min; retention times: 25.6 min (major), 16.7 min (minor).

$^1\text{H}$  NMR (400 MHz,  $\text{CDCl}_3$ )  $\delta$  7.44 (d, *J* = 7.2 Hz, 1H), 7.36 – 7.32 (m, 1H), 7.27 – 7.22 (m, 2H), 7.17 – 7.11 (m, 4H), 6.94 – 6.90 (m, 2H), 6.79 – 6.75 (m, 2H), 5.28 (d, *J* = 6.0 Hz, 1H), 3.75 (s, 3H), 3.12 (s, 1H), 2.63 – 2.58 (m, 1H), 1.70 (d, *J* = 11.6 Hz, 1H).

$^{13}\text{C}$  NMR (101 MHz,  $\text{CDCl}_3$ )  $\delta$  161.5 (d, *J* = 244.0 Hz), 158.8, 135.6, 133.5 (d, *J* = 3.0 Hz), 132.1, 130.2 (d, *J* = 7.0 Hz), 128.1, 127.9, 126.7, 125.3, 122.4, 115.4, 115.1, 113.5, 74.7, 68.5, 55.2, 36.8, 34.3, 31.2.

HRMS (ES<sup>+</sup>) Calcd for  $\text{C}_{24}\text{H}_{19}\text{FNaO}_2^+$  [M + Na]<sup>+</sup>: 381.1261, Found: 381.1269.

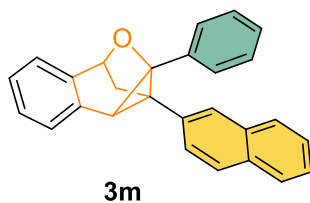

**(1S,3S,7bS)-1a-(Naphthalen-2-yl)-1-phenyl-1a,2,3,7b-tetrahydro-1H-1,3-epoxycyclopropa[a]naphthalene (3m)** was prepared according to the General Procedure B as a white solid (chromatography eluent: *n*-hexane/EtOAc = 100:1) in 64% yield (68.8 mg, 89% ee).

$[\alpha]_{\text{D}}^{23}$ : +216.5 (*c* = 1.0, CH<sub>2</sub>Cl<sub>2</sub>). HPLC analysis of the product: Daicel CHIRALPAK<sup>®</sup> IC column; 2% *i*PrOH in *n*-hexane; 1.0 mL/min; retention times: 9.6 min (major), 8.0 min (minor).

<sup>1</sup>H NMR (400 MHz, CDCl<sub>3</sub>) δ 7.74 – 7.64 (m, 4H), 7.49 (d, *J* = 7.2 Hz, 1H), 7.43 – 7.32 (m, 3H), 7.27 – 7.20 (m, 5H), 7.16 – 7.11 (m, 3H), 5.34 (d, *J* = 6.0 Hz, 1H), 3.34 (s, 1H), 2.73 – 2.67 (m, 1H), 1.75 (d, *J* = 12.0 Hz, 1H).

<sup>13</sup>C NMR (101 MHz, CDCl<sub>3</sub>) δ 135.6, 135.3, 135.0, 133.3, 132.2, 132.1, 128.0, 127.93, 127.87, 127.6, 127.5, 127.0, 126.9, 126.8, 126.2, 126.0, 125.7, 125.4, 122.3, 74.9, 68.6, 37.3, 36.0, 31.9.

HRMS (ES<sup>+</sup>) Calcd for C<sub>27</sub>H<sub>20</sub>NaO<sup>+</sup> [*M* + Na]<sup>+</sup>: 383.1406, Found: 383.1411.

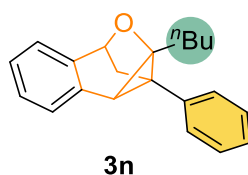

**(1R,3S,7bS)-1-Butyl-1a-phenyl-1a,2,3,7b-tetrahydro-1H-1,3-epoxycyclopropa[a]naphthalene (3n)** was prepared according to the General Procedure B (room temperature, catalyst loading: 10 mol%, reaction time: 48 h) as a colorless oil (chromatography eluent: *n*-hexane/EtOAc = 100:1) in 53% yield (46.0 mg, 90% ee).

$[\alpha]_{\text{D}}^{23}$ : -9.4 ( $c = 1.0$ ,  $\text{CH}_2\text{Cl}_2$ ). HPLC analysis of the product: Daicel CHIRALPAK® AD-H column; 3%  $i$ PrOH in  $n$ -hexane; 0.5 mL/min; retention times: 12.9 min (major), 10.0 min (minor).

$^1\text{H NMR}$  (400 MHz,  $\text{CDCl}_3$ )  $\delta$  7.40 – 7.29 (m, 6H), 7.26 – 7.15 (m, 3H), 5.12 (d,  $J = 6.0$  Hz, 1H), 2.61 (s, 1H), 2.52 (ddd,  $J_1 = 11.6$  Hz,  $J_2 = 6.0$  Hz,  $J_3 = 0.8$  Hz, 1H), 2.03 – 1.96 (m, 1H), 1.53 – 1.36 (m, 4H), 1.26 – 1.18 (m, 2H), 0.78 (t,  $J = 7.2$  Hz, 3H).

$^{13}\text{C NMR}$  (101 MHz,  $\text{CDCl}_3$ )  $\delta$  138.6, 135.4, 133.0, 128.48, 128.45, 127.7, 126.5, 126.4, 124.8, 122.2, 74.7, 67.5, 36.3, 32.2, 29.0, 28.52, 28.47, 22.6, 13.9.

HRMS (ES+) Calcd for  $\text{C}_{21}\text{H}_{22}\text{NaO}^+$   $[\text{M} + \text{H}]^+$ : 313.1563, Found: 313.1568

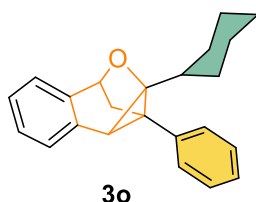

**(1R,3S,7bS)-1-Cyclohexyl-1a-phenyl-1a,2,3,7b-tetrahydro-1H-1,3-epoxycyclopropa[a]naphthalene (3o)** was prepared according to the General Procedure B (room temperature, catalyst loading: 10 mol%, reaction time: 48 h) as a white solid (chromatography eluent:  $n$ -hexane/EtOAc = 100:1) in 59% yield (55.6 mg, 92% ee).

$[\alpha]_{\text{D}}^{23}$ : -3.0 ( $c = 1.0$ ,  $\text{CH}_2\text{Cl}_2$ ). HPLC analysis of the product: Daicel CHIRALPAK® AD-H column; 2%  $i$ PrOH in  $n$ -hexane; 1.0 mL/min; retention times: 5.3 min (major), 4.6 min (minor).

$^1\text{H NMR}$  (400 MHz,  $\text{CDCl}_3$ )  $\delta$  7.43 – 7.40 (m, 2H), 7.38 – 7.20 (m, 5H), 7.18 – 7.14 (m, 2H), 5.11 (d,  $J = 6.0$  Hz, 1H), 2.66 (s, 1H), 2.60 – 2.55 (m, 1H), 1.75 (d,  $J = 12.4$  Hz, 1H), 1.67 – 1.56 (m, 4H), 1.49 – 1.41 (m, 2H), 1.36 – 1.21 (m, 2H), 1.16 – 1.01 (m, 3H).

$^{13}\text{C NMR}$  (101 MHz,  $\text{CDCl}_3$ )  $\delta$  138.3, 135.6, 133.0, 128.4, 128.3, 127.6, 126.34, 126.27, 124.7, 122.1, 74.3, 71.2, 37.9, 36.1, 33.0, 30.0, 28.9, 27.6, 26.4, 26.3, 26.2.

HRMS (ES+) Calcd for C<sub>23</sub>H<sub>24</sub>NaO<sup>+</sup> [M + Na]<sup>+</sup>: 339.1719, Found: 339.1725.

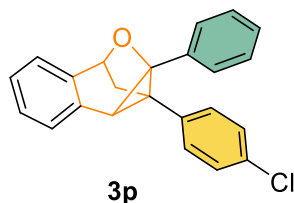

**(1S,3R,7bR)-1a-(4-Chlorophenyl)-1-phenyl-1a,2,3,7b-tetrahydro-1H-1,3-epoxycyclopropa[a]naphthalene (3p)** was prepared according to the General Procedure B (room temperature, catalyst loading: 5 mol%, reaction time: 4 h) as a white solid (chromatography eluent: *n*-hexane/DCM/EtOAc = 100:25:1) in 76% yield (78.6 mg, 86% ee).

[ $\alpha$ ]<sub>D</sub><sup>23</sup>: +178.9 (c = 1.0, CH<sub>2</sub>Cl<sub>2</sub>). HPLC analysis of the product: Daicel CHIRALPAK<sup>®</sup> IC-3 column; 2% *i*PrOH in *n*-hexane; 1.0 mL/min; retention times: 9.1 min (major), 7.6 min (minor).

<sup>1</sup>H NMR (400 MHz, CDCl<sub>3</sub>)  $\delta$  7.45 – 7.43 (m, 1H), 7.36 – 7.32 (m, 1H), 7.25 – 7.18 (m, 9H), 7.12 – 7.10 (m, 2H), 5.31 (d, *J* = 6.0 Hz, 1H), 3.19 (s, 1H), 2.61 – 2.56 (m, 1H), 1.71 (d, *J* = 11.6 Hz, 1H).

<sup>13</sup>C NMR (101 MHz, CDCl<sub>3</sub>)  $\delta$  136.2, 135.7, 135.0, 132.6, 132.0, 130.3, 128.7, 128.1(2C), 127.3, 126.9, 126.5, 125.6, 122.5, 77.5, 68.8, 37.2, 35.3, 31.7.

HRMS (ES+) Calcd for C<sub>23</sub>H<sub>18</sub>ClO<sup>+</sup> [M + H]<sup>+</sup>: 345.1041, Found: 345.1025.

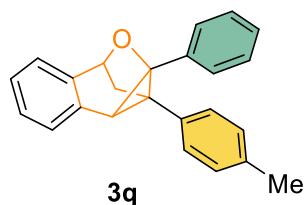

**(1S,3R,7bR)-1-Phenyl-1a-(*p*-tolyl)-1a,2,3,7b-tetrahydro-1H-1,3-epoxycyclopropa[a]naphthalene (3q)** was prepared according to the General Procedure B (room temperature, catalyst loading: 5 mol%, reaction time: 12 h) as a white



solid (chromatography eluent: *n*-hexane/DCM/EtOAc = 100:25:1) in 58% yield (52.8 mg, 79% ee).

$[\alpha]_{\text{D}}^{23}$ : +101.8 ( $c = 1.0$ ,  $\text{CH}_2\text{Cl}_2$ ). HPLC analysis of the product: Daicel CHIRALPAK<sup>®</sup> IC-3 column; 2% *i*PrOH in *n*-hexane; 1.0 mL/min; retention times: 8.9 min (major), 7.6 min (minor).

<sup>1</sup>H NMR (400 MHz,  $\text{CDCl}_3$ )  $\delta$  7.45 (d,  $J = 7.6$  Hz, 1H), 7.36 – 7.32 (m, 1H), 7.25 – 7.24 (m, 2H), 7.21 – 7.17 (m, 5H), 7.10 – 7.04 (m, 4H), 5.31 (d,  $J = 6.0$  Hz, 1H), 3.18 (s, 1H), 2.62 (ddd,  $J_1 = 11.6$  Hz,  $J_2 = 6.0$  Hz,  $J_3 = 0.8$  Hz, 1H), 2.29 (s, 3H), 1.71 (d,  $J = 11.6$  Hz, 1H).

<sup>13</sup>C NMR (101 MHz,  $\text{CDCl}_3$ )  $\delta$  136.4, 135.8, 135.6, 134.3, 132.4, 129.3, 128.9, 128.03, 127.98, 127.0, 126.9, 126.5, 125.4, 122.5, 75.0, 68.6, 37.4, 35.5, 31.9, 21.2.

HRMS (ES<sup>+</sup>) Calcd for  $\text{C}_{24}\text{H}_{21}\text{O}^+$   $[\text{M} + \text{H}]^+$ : 325.1587, Found: 325.1581.

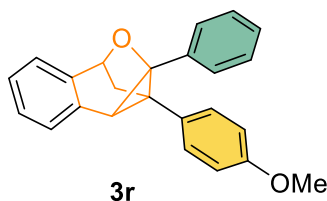

**(1S,3R,7bR)-1a-(4-Methoxyphenyl)-1-phenyl-1a,2,3,7b-tetrahydro-1H-1,3-epoxycyclopropa[a]naphthalene (3r)** was prepared according to the General Procedure B as a white solid (chromatography eluent: *n*-hexane/DCM/EtOAc = 100:25:1) in 50% yield (51.0 mg, 44% ee).

$[\alpha]_{\text{D}}^{23}$ : +43.1 ( $c = 1.0$ ,  $\text{CH}_2\text{Cl}_2$ ). HPLC analysis of the product: Daicel CHIRALPAK<sup>®</sup> IC-3 column; 2% *i*PrOH in *n*-hexane; 1.0 mL/min; retention times: 13.4 min (major), 11.3 min (minor).

<sup>1</sup>H NMR (400 MHz,  $\text{CDCl}_3$ )  $\delta$  7.44 (d,  $J = 7.6$  Hz, 1H), 7.36 – 7.32 (m, 1H), 7.27 – 7.16 (m, 7H), 7.15 – 7.10 (m, 2H), 6.81 – 6.77 (m, 2H), 5.30 (d,  $J = 6.0$  Hz, 1H), 3.76 (s, 3H), 3.15 (s, 1H), 2.61 – 2.56 (m, 1H), 1.70 (d,  $J = 11.6$  Hz, 1H).

<sup>13</sup>C NMR (101 MHz,  $\text{CDCl}_3$ )  $\delta$  158.5, 135.8, 135.7, 132.5, 130.2, 129.3, 128.03, 127.99, 126.93, 126.91, 126.3, 125.4, 122.5, 114.0, 75.0, 68.4, 55.3, 37.5, 35.3, 32.0.

**HRMS (ES+)** Calcd for  $C_{24}H_{21}O_2^+$   $[M + H]^+$ : 341.1537, Found: 341.1531.

#### IV Large-Scale Reaction

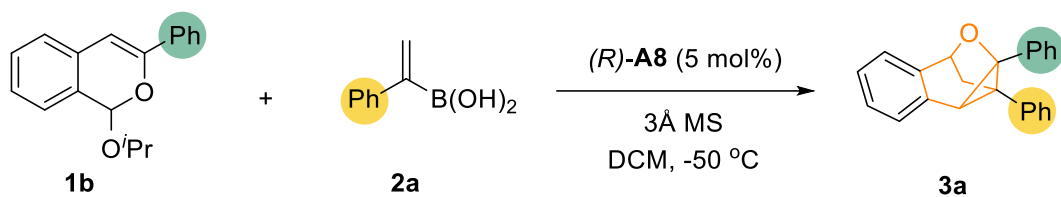

At -50 °C, to a solution of 3Å molecular sieves (300.0 mg), (R)-**A8** (0.15 mmol, 5 mol%) and vinylboronic acid **2a** (7.5 mmol) in DCM (15 mL) in a 50-mL flask was added acetal **1a** (3.0 mmol). The reaction mixture was stirred at -50 °C under N<sub>2</sub> atmosphere for 168 h before it was quenched by Et<sub>3</sub>N (1 drop), transferred to a flask with DCM (50 mL) and concentrated. Then the residue was directly purified by silica gel column chromatography to afford the desired product **3a** (706.4 mg) in 76% yield and 98% ee.

## V. Product Derivatizations

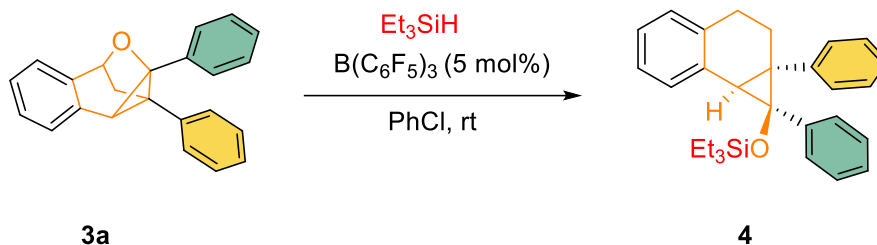

**(((1*S*,1*aR*)-1,1*a*-Diphenyl-1*a*,2,3,7*b*-tetrahydro-1*H*-cyclopropa[*a*]naphthalen-1-yl)oxy)triethylsilane (4).** At room temperature, to a solution of **3a** (31.0 mg, 0.1 mmol) and  $B(C_6F_5)_3$  (2.5 mg, 5  $\mu$ mol) in anhydrous DCM (1.0 mL) was added triethylsilane (14.0 mg, 0.12 mmol). The mixture was kept stirring at room temperature for 1 h before it was quenched by  $Et_3N$  (1 drop). The mixture was concentrated under reduced pressure, and the residue was directly purified by silica gel column chromatography (eluent: *n*-hexane) to afford the desired product **4** in 93% yield, 99% ee (39.7 mg).

$[\alpha]_D^{23}$ : +128.4 ( $c = 1.0$ ,  $CH_2Cl_2$ ). HPLC analysis of the product: Daicel CHIRALDICEL<sup>®</sup> OD-H column; 0.5 %  $i$ PrOH in *n*-hexane; 0.5 mL/min; retention times: 14.8 min (major), 12.7 min (minor).

$^1H$  NMR (400 MHz,  $CDCl_3$ )  $\delta$  7.49 (d,  $J = 7.2$  Hz, 1H), 7.30 – 7.28 (m, 2H), 7.24 – 6.99 (m, 10H), 6.96 – 6.92 (m, 1H), 3.22 (s, 1H), 3.07 – 3.01 (m, 1H), 2.85 – 2.74 (m, 2H), 2.07 – 2.00 (m, 1H), 0.61 (t,  $J = 8.0$  Hz, 9H), 0.04 (q,  $J = 8.0$  Hz, 6H).

$^{13}C$  NMR (101 MHz,  $CDCl_3$ )  $\delta$  144.0, 141.5, 137.9, 133.2, 130.7, 128.7, 128.5, 128.4, 127.7, 127.4, 126.7, 125.9, 125.5, 125.4, 73.0, 38.0, 28.7, 28.6, 27.6, 6.8, 5.3.

HRMS (CI<sup>+</sup>) Calcd for  $C_{29}H_{34}OSi$  [M]: 426.2379, Found: 426.2389.

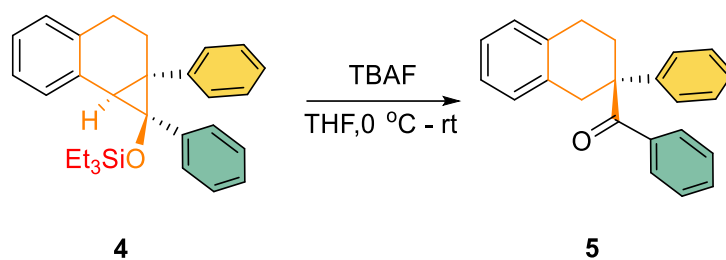

**(R)-Phenyl(2-phenyl-1,2,3,4-tetrahydronaphthalen-2-yl)methanone (5).** At 0 °C, to a solution of **4** (85.3 mg, 0.2 mmol) in THF (2.0 mL) was added TBAF (0.4 mL, 0.4 mmol, 1 M in THF). The mixture was kept stirring at room temperature for 1 h. The mixture was directly purified by silica gel column chromatography (eluent: *n*-hexane/EtOAc = 20:1) to afford the desired product **5** in 98% yield, 95% ee (61.2 mg).

$[\alpha]_D^{23}$ : -3.3 ( $c = 1.0$ ,  $\text{CH}_2\text{Cl}_2$ ). HPLC analysis of the product: Daicel CHIRALPAK® IC-3 column; 2% *i*PrOH in *n*-hexane; 1.0 mL/min; retention times: 8.4 min (major), 7.4 min (minor).

$^1\text{H NMR}$  (400 MHz,  $\text{CDCl}_3$ )  $\delta$  7.47 – 7.45 (m, 2H), 7.41 – 7.21 (m, 8H), 7.14 – 7.08 (m, 3H), 7.02 (d,  $J = 6.4$  Hz, 1H), 3.42 (d,  $J = 16.8$  Hz, 1H), 3.23 (d,  $J = 16.8$  Hz, 1H), 2.69 – 2.63 (m, 1H), 2.57 – 2.45 (m, 3H).

$^{13}\text{C NMR}$  (101 MHz,  $\text{CDCl}_3$ )  $\delta$  202.4, 142.9, 136.8, 135.6, 135.2, 131.9, 129.5, 129.3 (2C), 128.8, 128.2, 127.3, 126.4, 126.2, 126.0, 54.5, 39.6, 32.0, 26.2.

**HRMS** (ES+) Calcd for  $\text{C}_{23}\text{H}_{20}\text{NaO}^+$   $[\text{M} + \text{Na}]^+$ : 335.1407, Found: 335.1417.

## VI. Product Structure Determination

The structure of product **3a** was determined by X-ray crystallography. The X-ray data have been deposited at the Cambridge Crystallographic Data Center (CCDC 2356608). The structures of other products were assumed by analogy.

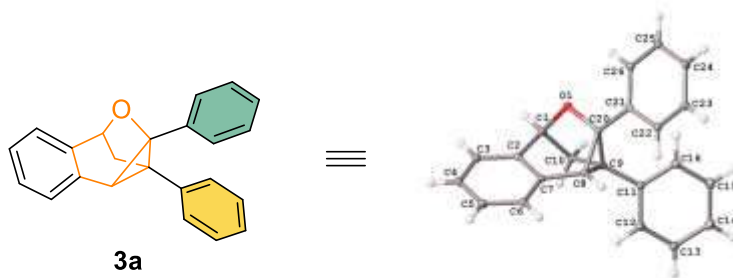

**Table S1. Crystal Data and Structure Refinement for 3a.**

|                                    |                                               |
|------------------------------------|-----------------------------------------------|
| Identification code                | <b>3a</b>                                     |
| Empirical formula                  | C <sub>23</sub> H <sub>18</sub> O             |
| Formula weight                     | 310.37                                        |
| Temperature/K                      | 100.00(10)                                    |
| Crystal system                     | orthorhombic                                  |
| Space group                        | P2 <sub>1</sub> 2 <sub>1</sub> 2 <sub>1</sub> |
| a/Å                                | 10.33817(7)                                   |
| b/Å                                | 10.45428(8)                                   |
| c/Å                                | 14.51868(10)                                  |
| α/°                                | 90                                            |
| β/°                                | 90                                            |
| γ/°                                | 90                                            |
| Volume/Å <sup>3</sup>              | 1569.15(2)                                    |
| Z                                  | 4                                             |
| ρ <sub>calc</sub> /cm <sup>3</sup> | 1.314                                         |
| μ/mm <sup>-1</sup>                 | 0.608                                         |
| F(000)                             | 656.0                                         |
| Crystal size/mm <sup>3</sup>       | 0.2 × 0.18 × 0.18                             |

|                                                  |                                                                    |
|--------------------------------------------------|--------------------------------------------------------------------|
| Radiation                                        | Cu K $\alpha$ ( $\lambda = 1.54184$ )                              |
| 2 $\Theta$ range for data collection/ $^{\circ}$ | 10.428 to 153.808                                                  |
| Index ranges                                     | $-13 \leq h \leq 11$ , $-12 \leq k \leq 12$ , $-18 \leq l \leq 13$ |
| Reflections collected                            | 10133                                                              |
| Independent reflections                          | 3252 [ $R_{\text{int}} = 0.0139$ , $R_{\text{sigma}} = 0.0135$ ]   |
| Data/restraints/parameters                       | 3252/0/218                                                         |
| Goodness-of-fit on $F^2$                         | 1.174                                                              |
| Final R indexes [ $I \geq 2\sigma(I)$ ]          | $R_1 = 0.0258$ , $wR_2 = 0.0720$                                   |
| Final R indexes [all data]                       | $R_1 = 0.0273$ , $wR_2 = 0.0865$                                   |
| Largest diff. peak/hole / e $\text{\AA}^{-3}$    | 0.24/-0.14                                                         |
| Flack parameter                                  | 0.01(6)                                                            |

**Table S2. Fractional Atomic Coordinates ( $\times 10^4$ ) and Equivalent Isotropic Displacement Parameters ( $\text{\AA}^2 \times 10^3$ ) for 3a.  $U_{\text{eq}}$  is Defined as 1/3 of the Trace of the Orthogonalised  $U_{\text{IJ}}$  Tensor.**

| Atom  | <i>x</i>     | <i>y</i>    | <i>z</i>    | $U(\text{eq})$ |
|-------|--------------|-------------|-------------|----------------|
| O(1)  | 2270.1 (11)  | 2588.2 (11) | 2858.8 (8)  | 14.3 (3)       |
| C(1)  | 1417.8 (16)  | 2320.2 (16) | 3638.2 (11) | 15.7 (3)       |
| C(2)  | 189.1 (17)   | 3046.2 (16) | 3469.7 (11) | 15.5 (3)       |
| C(3)  | -1048.4 (16) | 2528.6 (17) | 3402.7 (11) | 17.9 (3)       |
| C(4)  | -2087.8 (17) | 3336.5 (18) | 3207.7 (12) | 20.0 (4)       |
| C(5)  | -1891.0 (17) | 4644.0 (18) | 3084.3 (12) | 19.4 (4)       |
| C(6)  | -654.0 (16)  | 5159.8 (17) | 3155.0 (11) | 16.7 (3)       |
| C(7)  | 391.8 (16)   | 4359.0 (16) | 3344.8 (11) | 14.2 (3)       |
| C(8)  | 1749.4 (16)  | 4789.0 (16) | 3380.2 (11) | 14.1 (3)       |
| C(9)  | 2701.6 (16)  | 4114.5 (16) | 4035.1 (11) | 14.6 (3)       |
| C(10) | 2143.8 (17)  | 2901.2 (16) | 4458.7 (11) | 16.3 (3)       |
| C(11) | 3658.3 (16)  | 4873.7 (16) | 4577.0 (11) | 15.3 (3)       |
| C(12) | 3213.0 (18)  | 5634.1 (17) | 5301.0 (12) | 19.1 (4)       |
| C(13) | 4077.9 (19)  | 6289.8 (18) | 5859.4 (12) | 22.2 (4)       |
| C(14) | 5401.3 (19)  | 6214.1 (19) | 5694.3 (13) | 22.8 (4)       |
| C(15) | 5847.6 (18)  | 5481.5 (18) | 4967.4 (13) | 22.6 (4)       |
| C(16) | 4989.0 (17)  | 4797.4 (18) | 4416.7 (12) | 19.1 (4)       |
| C(20) | 2763.4 (15)  | 3832.9 (16) | 3010.8 (11) | 13.5 (3)       |
| C(21) | 3769.8 (16)  | 4193.6 (16) | 2330.5 (11) | 14.2 (3)       |
| C(22) | 4163.2 (17)  | 5463.3 (16) | 2223.0 (12) | 16.6 (3)       |
| C(23) | 5066.3 (17)  | 5792.8 (18) | 1553.7 (13) | 19.6 (4)       |
| C(24) | 5595.8 (18)  | 4861.9 (19) | 985.6 (13)  | 22.1 (4)       |
| C(25) | 5232.3 (17)  | 3589.7 (18) | 1101.4 (13) | 20.7 (4)       |
| C(26) | 4319.6 (17)  | 3259.9 (16) | 1763.8 (12) | 17.0 (3)       |



**Table S3. Anisotropic Displacement Parameters ( $\text{\AA}^2 \times 10^3$ ) for 3a. The Anisotropic Displacement Factor Exponent Takes the Form: -**

$$2\pi^2[h^2a^2U_{11}+2hka*b*U_{12}+...].$$

| Atom  | U <sub>11</sub> | U <sub>22</sub> | U <sub>33</sub> | U <sub>23</sub> | U <sub>13</sub> | U <sub>12</sub> |
|-------|-----------------|-----------------|-----------------|-----------------|-----------------|-----------------|
| O(1)  | 17.3 (6)        | 11.7 (5)        | 13.9 (5)        | -0.3 (4)        | 1.3 (4)         | -0.5 (4)        |
| C(1)  | 18.8 (8)        | 14.1 (7)        | 14.1 (7)        | 0.7 (6)         | 2.7 (6)         | 0.7 (6)         |
| C(2)  | 18.1 (8)        | 16.4 (8)        | 12.0 (7)        | 0.0 (6)         | 2.3 (6)         | 0.0 (6)         |
| C(3)  | 20.6 (8)        | 16.5 (8)        | 16.8 (7)        | -1.0 (6)        | 3.5 (6)         | -2.7 (7)        |
| C(4)  | 14.9 (7)        | 23.7 (9)        | 21.6 (8)        | -2.0 (7)        | 3.1 (7)         | -2.6 (7)        |
| C(5)  | 15.8 (8)        | 22.6 (9)        | 19.8 (8)        | -0.1 (7)        | 1.6 (6)         | 3.7 (7)         |
| C(6)  | 18.3 (8)        | 16.2 (8)        | 15.7 (7)        | 1.1 (6)         | 2.1 (6)         | 1.0 (6)         |
| C(7)  | 15.2 (8)        | 16.8 (8)        | 10.6 (7)        | -0.2 (6)        | 1.1 (6)         | -0.3 (6)        |
| C(8)  | 15.7 (7)        | 11.9 (7)        | 14.7 (7)        | 0.0 (6)         | 0.3 (6)         | 1.3 (6)         |
| C(9)  | 16.2 (8)        | 15.4 (8)        | 12.1 (7)        | -0.5 (6)        | 0.0 (6)         | 1.3 (6)         |
| C(10) | 19.5 (8)        | 15.6 (8)        | 13.7 (7)        | 1.2 (6)         | -0.6 (6)        | 1.3 (6)         |
| C(11) | 18.7 (8)        | 14.0 (7)        | 13.3 (7)        | 1.3 (6)         | -1.1 (6)        | -0.4 (6)        |
| C(12) | 21.2 (8)        | 19.3 (8)        | 16.7 (7)        | -0.7 (6)        | 2.7 (7)         | -1.5 (7)        |
| C(13) | 33.0 (10)       | 18.6 (8)        | 15.0 (8)        | -3.0 (6)        | 3.1 (7)         | -4.6 (7)        |
| C(14) | 28.4 (9)        | 21.8 (9)        | 18.2 (8)        | 1.0 (7)         | -7.1 (7)        | -4.3 (7)        |
| C(15) | 19.0 (8)        | 25.8 (9)        | 23.1 (9)        | 2.4 (7)         | -4.9 (7)        | 1.2 (7)         |
| C(16) | 18.4 (8)        | 21.7 (8)        | 17.3 (8)        | -1.1 (7)        | -2.1 (6)        | 4.8 (7)         |
| C(20) | 14.4 (7)        | 12.6 (8)        | 13.5 (7)        | -1.3 (6)        | -1.1 (6)        | -0.1 (6)        |
| C(21) | 13.2 (7)        | 17.7 (8)        | 11.8 (7)        | -0.4 (6)        | -2.8 (6)        | 1.3 (6)         |
| C(22) | 15.3 (7)        | 17.0 (8)        | 17.6 (8)        | -2.3 (6)        | -0.2 (6)        | 0.7 (6)         |
| C(23) | 17.4 (8)        | 20.0 (8)        | 21.3 (8)        | -0.3 (7)        | 0.1 (7)         | -2.5 (6)        |
| C(24) | 16.8 (8)        | 27.9 (10)       | 21.5 (8)        | -0.9 (7)        | 5.7 (6)         | -3.2 (7)        |
| C(25) | 18.6 (8)        | 22.7 (9)        | 20.8 (8)        | -4.8 (7)        | 3.8 (7)         | 1.4 (7)         |
| C(26) | 17.1 (7)        | 16.6 (8)        | 17.4 (8)        | -1.7 (7)        | -0.5 (6)        | 1.4 (6)         |

**Table S4. Bond Lengths for 3a.**

| <b>Atom</b> | <b>Atom</b> | <b>Length/Å</b> | <b>Atom</b> | <b>Atom</b> | <b>Length/Å</b> |
|-------------|-------------|-----------------|-------------|-------------|-----------------|
| O(1)        | C(1)        | 1.4613 (19)     | C(9)        | C(20)       | 1.517 (2)       |
| O(1)        | C(20)       | 1.415 (2)       | C(11)       | C(12)       | 1.396 (2)       |
| C(1)        | C(2)        | 1.500 (2)       | C(11)       | C(16)       | 1.397 (2)       |
| C(1)        | C(10)       | 1.533 (2)       | C(12)       | C(13)       | 1.388 (3)       |
| C(2)        | C(3)        | 1.392 (2)       | C(13)       | C(14)       | 1.391 (3)       |
| C(2)        | C(7)        | 1.400 (2)       | C(14)       | C(15)       | 1.383 (3)       |
| C(3)        | C(4)        | 1.396 (3)       | C(15)       | C(16)       | 1.392 (3)       |
| C(4)        | C(5)        | 1.394 (3)       | C(20)       | C(21)       | 1.483 (2)       |
| C(5)        | C(6)        | 1.392 (2)       | C(21)       | C(22)       | 1.397 (2)       |
| C(6)        | C(7)        | 1.395 (2)       | C(21)       | C(26)       | 1.397 (2)       |
| C(7)        | C(8)        | 1.475 (2)       | C(22)       | C(23)       | 1.391 (3)       |
| C(8)        | C(9)        | 1.540 (2)       | C(23)       | C(24)       | 1.388 (3)       |
| C(8)        | C(20)       | 1.545 (2)       | C(24)       | C(25)       | 1.392 (3)       |
| C(9)        | C(10)       | 1.523 (2)       | C(25)       | C(26)       | 1.391 (3)       |
| C(9)        | C(11)       | 1.492 (2)       |             |             |                 |

**Table S5. Bond Angles for 3a.**

| <b>Atom Atom Atom</b> | <b>Angle/°</b> | <b>Atom Atom Atom</b> | <b>Angle/°</b> |
|-----------------------|----------------|-----------------------|----------------|
| C(20) O(1) C(1)       | 105.84 (12)    | C(9) C(10) C(1)       | 101.62 (13)    |
| O(1) C(1) C(2)        | 106.70 (13)    | C(12) C(11) C(9)      | 118.77 (15)    |
| O(1) C(1) C(10)       | 103.33 (13)    | C(12) C(11) C(16)     | 118.85 (16)    |
| C(2) C(1) C(10)       | 109.93 (13)    | C(16) C(11) C(9)      | 122.30 (15)    |
| C(3) C(2) C(1)        | 126.36 (15)    | C(13) C(12) C(11)     | 120.57 (16)    |
| C(3) C(2) C(7)        | 120.62 (16)    | C(12) C(13) C(14)     | 120.31 (17)    |
| C(7) C(2) C(1)        | 112.98 (15)    | C(15) C(14) C(13)     | 119.40 (17)    |
| C(2) C(3) C(4)        | 119.10 (16)    | C(14) C(15) C(16)     | 120.66 (17)    |
| C(5) C(4) C(3)        | 120.48 (16)    | C(15) C(16) C(11)     | 120.18 (17)    |
| C(6) C(5) C(4)        | 120.32 (16)    | O(1) C(20) C(8)       | 113.87 (13)    |
| C(5) C(6) C(7)        | 119.62 (16)    | O(1) C(20) C(9)       | 108.43 (13)    |
| C(2) C(7) C(8)        | 115.90 (15)    | O(1) C(20) C(21)      | 112.50 (13)    |
| C(6) C(7) C(2)        | 119.86 (16)    | C(9) C(20) C(8)       | 60.37 (10)     |
| C(6) C(7) C(8)        | 124.16 (16)    | C(21) C(20) C(8)      | 122.87 (14)    |
| C(7) C(8) C(9)        | 119.37 (14)    | C(21) C(20) C(9)      | 129.26 (14)    |
| C(7) C(8) C(20)       | 115.88 (14)    | C(22) C(21) C(20)     | 121.34 (15)    |
| C(9) C(8) C(20)       | 58.94 (10)     | C(22) C(21) C(26)     | 118.65 (15)    |
| C(10) C(9) C(8)       | 112.88 (14)    | C(26) C(21) C(20)     | 119.99 (15)    |
| C(11) C(9) C(8)       | 120.38 (14)    | C(23) C(22) C(21)     | 120.58 (16)    |
| C(11) C(9) C(10)      | 118.75 (14)    | C(24) C(23) C(22)     | 120.40 (17)    |
| C(11) C(9) C(20)      | 126.30 (14)    | C(23) C(24) C(25)     | 119.44 (17)    |
| C(20) C(9) C(8)       | 60.69 (10)     | C(26) C(25) C(24)     | 120.22 (17)    |
| C(20) C(9) C(10)      | 104.49 (13)    | C(25) C(26) C(21)     | 120.67 (16)    |

**Table S6. Torsion Angles for 3a.**

| A                   | B          | C     | D | Angle/°     | A                    | B               | C          | D | Angle/°     |
|---------------------|------------|-------|---|-------------|----------------------|-----------------|------------|---|-------------|
| O(1)C(1)            | C(2)       | C(3)  |   | 121.59(17)  | C(9)                 | C(8)            | C(20)C(21) |   | -119.95(17) |
| O(1)C(1)            | C(2)       | C(7)  |   | -56.19(18)  | C(9)                 | C(11)C(12)C(13) |            |   | 175.81(16)  |
| O(1)C(1)            | C(10)C(9)  |       |   | 38.38(15)   | C(9)                 | C(11)C(16)C(15) |            |   | -177.15(16) |
| O(1)C(20)C(21)C(22) |            |       |   | 165.02(14)  | C(9)                 | C(20)C(21)C(22) |            |   | -53.7(2)    |
| O(1)C(20)C(21)C(26) |            |       |   | -13.3(2)    | C(9)                 | C(20)C(21)C(26) |            |   | 128.06(18)  |
| C(1)O(1)            | C(20)C(8)  |       |   | -40.95(16)  | C(10)C(1)            | C(2)            | C(3)       |   | -127.01(17) |
| C(1)O(1)            | C(20)C(9)  |       |   | 24.06(16)   | C(10)C(1)            | C(2)            | C(7)       |   | 55.20(18)   |
| C(1)O(1)            | C(20)C(21) |       |   | 173.39(13)  | C(10)C(9)            | C(11)C(12)      |            |   | -76.0(2)    |
| C(1)C(2)            | C(3)       | C(4)  |   | -177.54(15) | C(10)C(9)            | C(11)C(16)      |            |   | 100.53(19)  |
| C(1)C(2)            | C(7)       | C(6)  |   | 178.18(15)  | C(10)C(9)            | C(20)O(1)       |            |   | 0.86(17)    |
| C(1)C(2)            | C(7)       | C(8)  |   | 1.2(2)      | C(10)C(9)            | C(20)C(8)       |            |   | 108.39(14)  |
| C(2)C(1)            | C(10)C(9)  |       |   | -75.20(16)  | C(10)C(9)            | C(20)C(21)      |            |   | -141.65(17) |
| C(2)C(3)            | C(4)       | C(5)  |   | -0.2(3)     | C(11)C(9)            | C(10)C(1)       |            |   | -170.79(14) |
| C(2)C(7)            | C(8)       | C(9)  |   | -34.3(2)    | C(11)C(9)            | C(20)O(1)       |            |   | 144.57(15)  |
| C(2)C(7)            | C(8)       | C(20) |   | 33.0(2)     | C(11)C(9)            | C(20)C(8)       |            |   | -107.90(18) |
| C(3)C(2)            | C(7)       | C(6)  |   | 0.3(2)      | C(11)C(9)            | C(20)C(21)      |            |   | 2.1(3)      |
| C(3)C(2)            | C(7)       | C(8)  |   | -176.72(15) | C(11)C(12)C(13)C(14) |                 |            |   | 1.1(3)      |
| C(3)C(4)            | C(5)       | C(6)  |   | -0.1(3)     | C(12)C(11)C(16)C(15) |                 |            |   | -0.6(3)     |
| C(4)C(5)            | C(6)       | C(7)  |   | 0.4(3)      | C(12)C(13)C(14)C(15) |                 |            |   | 0.1(3)      |
| C(5)C(6)            | C(7)       | C(2)  |   | -0.5(2)     | C(13)C(14)C(15)C(16) |                 |            |   | -1.6(3)     |
| C(5)C(6)            | C(7)       | C(8)  |   | 176.22(16)  | C(14)C(15)C(16)C(11) |                 |            |   | 1.9(3)      |
| C(6)C(7)            | C(8)       | C(9)  |   | 148.84(16)  | C(16)C(11)C(12)C(13) |                 |            |   | -0.8(3)     |
| C(6)C(7)            | C(8)       | C(20) |   | -143.80(16) | C(20)O(1)            | C(1)            | C(2)       |   | 76.63(15)   |
| C(7)C(2)            | C(3)       | C(4)  |   | 0.1(2)      | C(20)O(1)            | C(1)            | C(10)      |   | -39.27(15)  |
| C(7)C(8)            | C(9)       | C(10) |   | 10.0(2)     | C(20)C(8)            | C(9)            | C(10)      |   | -94.27(15)  |
| C(7)C(8)            | C(9)       | C(11) |   | -138.52(16) | C(20)C(8)            | C(9)            | C(11)      |   | 117.25(17)  |
| C(7)C(8)            | C(9)       | C(20) |   | 104.23(17)  | C(20)C(9)            | C(10)C(1)       |            |   | -23.75(16)  |
| C(7)C(8)            | C(20)O(1)  |       |   | -11.7(2)    | C(20)C(9)            | C(11)C(12)      |            |   | 144.83(17)  |
| C(7)C(8)            | C(20)C(9)  |       |   | -110.12(16) | C(20)C(9)            | C(11)C(16)      |            |   | -38.7(3)    |

|                     |              |                      |              |
|---------------------|--------------|----------------------|--------------|
| C(7)C(8) C(20)C(21) | 129.92 (16)  | C(20)C(21)C(22)C(23) | -177.12 (15) |
| C(8)C(9) C(10)C(1)  | 40.17 (17)   | C(20)C(21)C(26)C(25) | 177.81 (16)  |
| C(8)C(9) C(11)C(12) | 70.7 (2)     | C(21)C(22)C(23)C(24) | -0.4 (3)     |
| C(8)C(9) C(11)C(16) | -112.80 (19) | C(22)C(21)C(26)C(25) | -0.5 (2)     |
| C(8)C(9) C(20)O(1)  | -107.53 (14) | C(22)C(23)C(24)C(25) | -1.1 (3)     |
| C(8)C(9) C(20)C(21) | 109.97 (19)  | C(23)C(24)C(25)C(26) | 1.8 (3)      |
| C(8)C(20)C(21)C(22) | 22.9 (2)     | C(24)C(25)C(26)C(21) | -1.0 (3)     |
| C(8)C(20)C(21)C(26) | -155.37 (15) | C(26)C(21)C(22)C(23) | 1.2 (3)      |
| C(9)C(8) C(20)O(1)  | 98.40 (15)   |                      |              |

**Table S7. Hydrogen Atom Coordinates ( $\text{\AA} \times 10^4$ ) and Isotropic Displacement Parameters ( $\text{\AA}^2 \times 10^3$ ) for 3a.**

| Atom   | <i>x</i> | <i>y</i> | <i>z</i> | U(eq) |
|--------|----------|----------|----------|-------|
| H(1)   | 1260     | 1383     | 3719     | 19    |
| H(3)   | -1183    | 1638     | 3489     | 22    |
| H(4)   | -2936    | 2993     | 3159     | 24    |
| H(5)   | -2605    | 5186     | 2951     | 23    |
| H(6)   | -523     | 6052     | 3074     | 20    |
| H(8)   | 1912     | 5716     | 3254     | 17    |
| H(10A) | 1549     | 3100     | 4974     | 20    |
| H(10B) | 2836     | 2324     | 4681     | 20    |
| H(12)  | 2310     | 5703     | 5413     | 23    |
| H(13)  | 3765     | 6793     | 6357     | 27    |
| H(14)  | 5993     | 6661     | 6077     | 27    |
| H(15)  | 6749     | 5445     | 4843     | 27    |
| H(16)  | 5309     | 4277     | 3931     | 23    |
| H(22)  | 3811     | 6107     | 2611     | 20    |
| H(23)  | 5322     | 6660     | 1485     | 23    |
| H(24)  | 6201     | 5091     | 522      | 26    |
| H(25)  | 5609     | 2945     | 727      | 25    |
| H(26)  | 4067     | 2391     | 1832     | 20    |

## VII. Computational Details

All structures were optimized and characterized in dichloromethane with the SMD<sup>4</sup> solvent model (SCRF = SMD) at M06-2X<sup>5</sup>/6-31G(d) level. Harmonic frequency analysis calculations at the same level were performed to verify the optimized transition states (TSs, having unique one imaginary frequency). The energies were further improved by M06-2X/6-311+G(d,p) //M06-2X/6-31G(d) single-point calculations with solvent effects accounted by the SMD solvent model, using the experimental solvent (dichloromethane). Intrinsic reaction coordinate (IRC) calculations for cycloaddition transition states were carried out at the M06-2X/6-31G(d) level to verify the transition state correctly connecting with its nearby minima.<sup>6</sup> All DFT calculations were carried out using Gaussian 09 program.<sup>7</sup> Computed structures are illustrated using the CYLview.<sup>8</sup>

- 
4. A. V. Marenich, C. J. Cramer, D. G. Truhlar, *J. Phys. Chem. B* 2009, **113**, 6378–6396.
  5. (a) Y. Zhao, D. G. Truhlar, *Theor. Chem. Acc.* 2008, **120**, 215–241. (b) Y. Zhao, D. G. Truhlar, *Acc. Chem. Res.* 2008, **41**, 157–167. (c) Y. Zhao, D. G. Truhlar, *J. Chem. Theory Comput.* 2009, **5**, 324–333.
  - 6 K. Fukui, *Acc. Chem. Res.* 1981, **14**, 363.
  - 7 M. J. Frisch, G. W. Trucks, H. B. Schlegel, G. E. Scuseria, M. A. Robb, J. R. Cheeseman, G. Scalmani, V. Barone, B. Mennucci, G. A. Petersson, H. Nakatsuji, M. Caricato, X. Li, H. P. Hratchian, A. F. Izmaylov, J. Bloino, G. Zheng, J. L. Sonnenberg, M. Hada, M. Ehara, K. Toyota, R. Fukuda, J. Hasegawa, M. Ishida, T. Nakajima, Y. Honda, O. Kitao, H. Nakai, T. Vreven, J. A. Montgomery, Jr.; J. E. Peralta, F. Ogliaro, M. Bearpark, J. J. Heyd, E. Brothers, K. N. Kudin, V. N. Staroverov, T. Keith, R. Kobayashi, J. Normand, K. Raghavachari, A. Rendell, J. C. Burant, S. S. Iyengar, J. Tomasi, M. Cossi, N. Rega, J. M. Millam, M. Klene, J. E. Knox, J. B. Cross, V. Bakken, C. Adamo, J. Jaramillo, R. Gomperts, R. E. Stratmann, O. Yazyev, A. J. Austin, R. Cammi, C. Pomelli, J. W. Ochterski, R. L. Martin, K. Morokuma, V. G. Zakrzewski, G. A. Voth, P. Salvador, J. J. Dannenberg, S. Dapprich, A. D. Daniels, O. Farkas, J. B. Foresman, J. V. Ortiz, J. Cioslowski, and D. J. Fox, *Gaussian 09*, Rev. A.01; Gaussian, Inc.: Wallingford, CT, 2010.
  - 8 C. Y. Legault, *CYLView, version 1.0 b*; Université de Sherbrooke: Sherbrooke,

**Cartesian Coordinates in Å, SCF Energies and Free Energies (in a.u.) at 298.15 K and 1 atm for the Optimized Structures [BSI= 6-31G(d), BSII = 6-311+G(d,p)]**

TSA-major

M06-2X/BSI SCF energy in dichloromethane: -4205.974053 a.u.

M06-2X/BSII SCF energy in dichloromethane: -4207.035873 a.u.

M06-2X/BSII free energy in dichloromethane: -4205.885975 a.u.

|   |             |            |             |
|---|-------------|------------|-------------|
| P | -0.54789000 | 1.04013600 | 0.90925600  |
| O | -1.82968000 | 1.48518000 | -0.02031300 |
| O | 0.26954000  | 2.45399500 | 0.99916900  |
| O | 0.26497800  | 0.14163000 | -0.02141100 |
| O | -0.93916100 | 0.63247900 | 2.27178500  |
| C | 0.14044100  | 3.43686900 | 0.04812300  |
| C | -1.04449700 | 4.14058100 | -0.05484500 |
| C | -1.14090700 | 5.18719700 | -1.03291900 |
| C | 0.01412400  | 5.52661300 | -1.79367800 |
| C | 1.20396300  | 4.77500700 | -1.63092500 |
| C | 1.27887400  | 3.72129500 | -0.75216900 |
| H | -3.25679200 | 5.61404800 | -0.78027700 |
| C | -2.34993400 | 5.88599100 | -1.30817300 |
| C | -0.05313000 | 6.57976300 | -2.74549700 |
| H | 2.06494700  | 5.02030900 | -2.24808900 |
| C | -1.22531100 | 7.25623400 | -2.96238400 |
| C | -2.38784200 | 6.89202100 | -2.24151700 |
| H | 0.84463300  | 6.82669600 | -3.30612900 |
| H | -1.27146000 | 8.05731900 | -3.69366700 |
| H | -3.32315300 | 7.40843200 | -2.43524800 |



|   |             |             |             |
|---|-------------|-------------|-------------|
| C | -2.23562600 | 3.71006800  | 0.72853500  |
| C | -3.01035300 | 4.59552900  | 1.54883800  |
| C | -2.64885700 | 2.39835400  | 0.61785400  |
| C | -2.58784900 | 5.91718100  | 1.85539300  |
| C | -4.23198300 | 4.12554100  | 2.10965600  |
| C | -3.90100800 | 1.93378200  | 1.10413500  |
| C | -3.34965300 | 6.72980100  | 2.65872000  |
| H | -1.64335400 | 6.27618100  | 1.45858700  |
| C | -5.00547000 | 4.99516800  | 2.92343700  |
| C | -4.67288100 | 2.80408400  | 1.83073700  |
| C | -4.57743200 | 6.27000900  | 3.19263600  |
| H | -3.00651300 | 7.73341400  | 2.89105500  |
| H | -5.94084900 | 4.62327600  | 3.33319800  |
| H | -5.64385200 | 2.48405300  | 2.20116600  |
| H | -5.17240100 | 6.92590500  | 3.82051500  |
| C | -3.66275100 | -1.52422000 | 3.65070800  |
| C | -3.75401500 | -0.43066300 | 2.84165700  |
| C | -4.33437300 | -0.52388100 | 1.53392900  |
| C | -4.83015800 | -1.79904700 | 1.08375300  |
| C | -4.69271600 | -2.92402900 | 1.96328400  |
| C | -4.13519600 | -2.79145200 | 3.20160300  |
| C | -4.40270000 | 0.59127900  | 0.68367400  |
| C | -5.40858900 | -1.92085100 | -0.19576100 |
| C | -5.49320700 | -0.79351300 | -1.03885000 |
| C | -4.96950600 | 0.47147800  | -0.60052600 |
| C | -5.04452900 | 1.58991300  | -1.49598700 |
| H | -4.64816100 | 2.54762900  | -1.17510600 |
| C | -5.60590300 | 1.47242100  | -2.73335300 |
| C | -6.14938600 | 0.22694200  | -3.15828500 |

|   |             |             |             |
|---|-------------|-------------|-------------|
| C | -6.09972900 | -0.86189900 | -2.33766700 |
| H | -3.21238800 | -1.43663200 | 4.63458800  |
| H | -3.35546000 | 0.52424400  | 3.16354400  |
| H | -5.03669200 | -3.89530800 | 1.62517000  |
| H | -4.04225900 | -3.65813600 | 3.84990700  |
| H | -5.64762900 | 2.33207800  | -3.39510200 |
| H | -6.61313100 | 0.14827000  | -4.13687900 |
| H | -6.52959400 | -1.80108000 | -2.66687300 |
| C | 2.10202200  | 0.99041400  | -3.89642900 |
| C | 1.82507100  | 1.80000100  | -2.83422300 |
| C | 2.79809200  | 2.04534100  | -1.80860900 |
| C | 4.07948700  | 1.40142600  | -1.90826300 |
| C | 4.32868300  | 0.56529700  | -3.04887200 |
| C | 3.37978800  | 0.36923800  | -4.00929300 |
| C | 2.51494100  | 2.88375800  | -0.71411900 |
| C | 5.04088600  | 1.58492900  | -0.89263300 |
| C | 4.71588100  | 2.34585300  | 0.25048600  |
| C | 3.43710300  | 2.99972800  | 0.33974400  |
| C | 3.14597200  | 3.78843500  | 1.50043100  |
| H | 2.18143100  | 4.28137500  | 1.56896000  |
| C | 4.05008400  | 3.91812300  | 2.51260400  |
| C | 5.32495100  | 3.28934400  | 2.41803300  |
| C | 5.64758100  | 2.54113400  | 1.32419700  |
| H | 1.34546700  | 0.81053900  | -4.65425400 |
| H | 0.84502100  | 2.25567800  | -2.74066200 |
| H | 5.28766500  | 0.06541200  | -3.13171900 |
| H | 3.59115600  | -0.27467800 | -4.85798100 |
| H | 3.80523900  | 4.50914900  | 3.38963800  |
| H | 6.04663400  | 3.41644700  | 3.21912100  |

|   |             |             |             |
|---|-------------|-------------|-------------|
| H | 6.62808200  | 2.08361300  | 1.25742700  |
| C | -5.91685200 | -3.24029300 | -0.67404500 |
| C | -7.02069400 | -3.85028400 | -0.06644800 |
| C | -5.30536100 | -3.88110200 | -1.75846700 |
| C | -7.50191400 | -5.07198900 | -0.53215500 |
| H | -7.50536600 | -3.35939400 | 0.77358100  |
| C | -5.79116000 | -5.09904500 | -2.22997600 |
| H | -4.44365400 | -3.41804300 | -2.23337100 |
| C | -6.88998400 | -5.69860600 | -1.61685900 |
| H | -8.36062300 | -5.53117800 | -0.05149400 |
| H | -5.30729700 | -5.58115100 | -3.07471700 |
| H | -7.26896800 | -6.64776100 | -1.98357900 |
| C | 6.39972500  | 0.98642100  | -1.04943900 |
| C | 7.23787700  | 1.40861600  | -2.08921500 |
| C | 6.86103400  | -0.00839100 | -0.17982300 |
| C | 8.49900500  | 0.84310700  | -2.26108600 |
| H | 6.89212900  | 2.18362200  | -2.76830300 |
| C | 8.12180300  | -0.57684100 | -0.35166200 |
| H | 6.22650100  | -0.32348200 | 0.64288600  |
| C | 8.94335800  | -0.15483500 | -1.39496300 |
| H | 9.13556100  | 1.18340600  | -3.07250200 |
| H | 8.46234200  | -1.34772100 | 0.33369500  |
| H | 9.92576700  | -0.59730100 | -1.52983500 |
| C | 1.38689600  | -4.57938700 | 0.05500600  |
| C | 2.12516200  | -4.67302400 | 1.19530100  |
| C | 3.54641700  | -4.55181000 | 1.15060800  |
| C | 4.13387800  | -4.15761300 | -0.07364000 |
| H | 3.94738100  | -5.13783500 | 3.19169200  |
| H | 1.63841600  | -4.94190600 | 2.12537900  |

|   |             |             |             |
|---|-------------|-------------|-------------|
| C | 4.38880900  | -4.83961300 | 2.24572000  |
| C | 5.53437000  | -4.03567000 | -0.20514200 |
| C | 6.33449200  | -4.34009800 | 0.87317600  |
| C | 5.75583100  | -4.74183100 | 2.09904600  |
| H | 5.95802800  | -3.70928100 | -1.15102700 |
| H | 7.41391200  | -4.27071800 | 0.78737700  |
| H | 6.40218000  | -4.97067900 | 2.94069300  |
| O | 1.99750400  | -4.26035300 | -1.11624000 |
| C | -0.03074600 | -4.93066000 | -0.09751800 |
| C | -0.87546000 | -4.93771000 | 1.01956000  |
| C | -0.53444500 | -5.31208400 | -1.34541900 |
| C | -2.19836000 | -5.34082700 | 0.88956500  |
| H | -0.50814900 | -4.59250400 | 1.97969000  |
| C | -1.86209300 | -5.71346400 | -1.46979500 |
| H | 0.11315500  | -5.30453100 | -2.21573900 |
| C | -2.69578300 | -5.73555300 | -0.35291700 |
| H | -2.84524400 | -5.34056300 | 1.76072100  |
| H | -2.24192000 | -6.01444800 | -2.44178000 |
| H | -3.72983000 | -6.05324900 | -0.44794600 |
| C | 2.82927500  | -1.24349900 | 1.60885400  |
| C | 2.05363200  | -0.76071700 | 2.68020000  |
| C | 2.62930900  | -0.50260000 | 3.92052400  |
| C | 3.98464300  | -0.74611600 | 4.14005300  |
| C | 4.76308100  | -1.25262400 | 3.10121600  |
| C | 4.19140200  | -1.49091600 | 1.85549800  |
| H | 0.99151700  | -0.59419200 | 2.54080800  |
| H | 2.01038400  | -0.11235600 | 4.72348500  |
| H | 4.42889300  | -0.54812500 | 5.11131400  |
| H | 5.81808100  | -1.46274300 | 3.25759900  |

|   |             |             |             |
|---|-------------|-------------|-------------|
| H | 4.81971900  | -1.88262700 | 1.06315000  |
| C | 2.22214900  | -1.45502100 | 0.27763100  |
| C | 3.01690600  | -1.57383700 | -0.82947500 |
| H | 4.09403400  | -1.40604700 | -0.81283100 |
| H | 2.53733700  | -1.54702600 | -1.80452500 |
| B | 0.59818400  | -1.42006700 | 0.03949800  |
| O | -0.09633000 | -2.03674600 | 1.13024500  |
| H | -1.02446800 | -2.18944700 | 0.90019200  |
| O | 0.30550700  | -1.93999200 | -1.27212000 |
| C | -0.76949700 | -1.45986500 | -2.04329400 |
| H | -0.65624600 | -0.37539700 | -2.19583700 |
| C | -0.70211800 | -2.15174100 | -3.39832200 |
| H | -0.88633900 | -3.22634600 | -3.28322400 |
| H | -1.45002500 | -1.74432000 | -4.08678900 |
| H | 0.28985600  | -2.01927700 | -3.84352500 |
| C | -2.12271800 | -1.70508800 | -1.37766200 |
| H | -2.22433200 | -2.76624100 | -1.10986300 |
| H | -2.24574300 | -1.09817000 | -0.47288100 |
| H | -2.93873300 | -1.43588600 | -2.05850400 |
| C | 3.24940500  | -3.84156400 | -1.13392600 |
| H | 3.60136000  | -3.62904000 | -2.13754300 |

#### TSA-minor

M06-2X/BSI SCF energy in dichloromethane: -4205.97731 a.u.

M06-2X/BSII SCF energy in dichloromethane: -4207.038216a.u.

M06-2X/BSII free energy in dichloromethane: -4205.884514 a.u.

|   |            |            |             |
|---|------------|------------|-------------|
| P | 0.00586600 | 1.10938700 | -0.81365800 |
| O | 1.44404500 | 1.58281000 | -0.19034100 |

|   |             |            |             |
|---|-------------|------------|-------------|
| O | -0.77315000 | 2.52990400 | -0.95821000 |
| O | -0.68327500 | 0.34798600 | 0.32949300  |
| O | 0.09010200  | 0.50059000 | -2.15953300 |
| C | -0.61713900 | 3.50736400 | -0.00107300 |
| C | 0.56595300  | 4.21177700 | 0.04745300  |
| C | 0.72056500  | 5.21374800 | 1.06320600  |
| C | -0.38957900 | 5.51958600 | 1.90203700  |
| C | -1.59974200 | 4.79113000 | 1.76329600  |
| C | -1.72381400 | 3.77528400 | 0.84807900  |
| H | 2.81681100  | 5.64520600 | 0.69699000  |
| C | 1.94679300  | 5.89607100 | 1.29428700  |
| C | -0.25768800 | 6.52407600 | 2.89848200  |
| H | -2.43306300 | 5.02929400 | 2.42007800  |
| C | 0.93111200  | 7.18289400 | 3.07933500  |
| C | 2.04784300  | 6.85131200 | 2.27520700  |
| H | -1.11984500 | 6.75060200 | 3.52030800  |
| H | 1.02550500  | 7.94582200 | 3.84572900  |
| H | 2.99598200  | 7.35419200 | 2.43951400  |
| C | 1.67674700  | 3.85190900 | -0.87636800 |
| C | 2.31797600  | 4.81309200 | -1.72529500 |
| C | 2.13367500  | 2.54935800 | -0.89816500 |
| C | 1.82615000  | 6.13706400 | -1.88377700 |
| C | 3.47013800  | 4.42360800 | -2.46493300 |
| C | 3.34108600  | 2.16853100 | -1.54914900 |
| C | 2.45944500  | 7.02646400 | -2.71612600 |
| H | 0.93008200  | 6.43638800 | -1.34981300 |
| C | 4.10921600  | 5.36931300 | -3.31002500 |
| C | 3.98320800  | 3.10736500 | -2.31719900 |
| C | 3.61866200  | 6.64454000 | -3.43290500 |

|   |             |             |             |
|---|-------------|-------------|-------------|
| H | 2.06361500  | 8.03083700  | -2.83112800 |
| H | 4.99270100  | 5.05848700  | -3.86136100 |
| H | 4.91857300  | 2.84969600  | -2.80848200 |
| H | 4.10987500  | 7.36045000  | -4.08460500 |
| C | 2.49190100  | -1.45345600 | -3.72297500 |
| C | 2.80995300  | -0.30378300 | -3.06197800 |
| C | 3.69233000  | -0.31707900 | -1.93404000 |
| C | 4.27608300  | -1.56818900 | -1.52479400 |
| C | 3.88570500  | -2.75560400 | -2.22950100 |
| C | 3.02659100  | -2.70053700 | -3.28899300 |
| C | 3.98106500  | 0.85750600  | -1.22073700 |
| C | 5.18427300  | -1.60235300 | -0.44701800 |
| C | 5.50961300  | -0.41262300 | 0.23566400  |
| C | 4.88287100  | 0.82648500  | -0.13960900 |
| C | 5.18633700  | 2.00279800  | 0.62538600  |
| H | 4.69943800  | 2.93729900  | 0.36812500  |
| C | 6.06741100  | 1.96618000  | 1.66596000  |
| C | 6.72599200  | 0.75033500  | 2.00569200  |
| C | 6.45677600  | -0.39388600 | 1.31388700  |
| H | 1.81566900  | -1.42384300 | -4.57193700 |
| H | 2.37676000  | 0.64114300  | -3.36914200 |
| H | 4.28184800  | -3.71174600 | -1.90554500 |
| H | 2.74803000  | -3.61303000 | -3.80859100 |
| H | 6.27855400  | 2.86852800  | 2.23169900  |
| H | 7.44677200  | 0.73798900  | 2.81780600  |
| H | 6.97114300  | -1.31196000 | 1.57442600  |
| C | -2.67914100 | 0.85385700  | 3.81010900  |
| C | -2.37411500 | 1.76843200  | 2.84573300  |
| C | -3.24936200 | 1.99418600  | 1.73118000  |

|   |             |             |             |
|---|-------------|-------------|-------------|
| C | -4.44248000 | 1.19642800  | 1.62977300  |
| C | -4.71477600 | 0.23500500  | 2.65964400  |
| C | -3.87176900 | 0.07863700  | 3.71980900  |
| C | -2.96061400 | 2.94922700  | 0.73926600  |
| C | -5.30079100 | 1.35644800  | 0.52815900  |
| C | -5.01235900 | 2.31596700  | -0.46040800 |
| C | -3.82899200 | 3.12335300  | -0.35372100 |
| C | -3.57189600 | 4.09626300  | -1.37511100 |
| H | -2.68251800 | 4.71418100  | -1.29859200 |
| C | -4.42419000 | 4.25851700  | -2.42786200 |
| C | -5.60166600 | 3.46268800  | -2.52988300 |
| C | -5.88464900 | 2.52687900  | -1.57916400 |
| H | -2.00859300 | 0.70763200  | 4.65136900  |
| H | -1.45522400 | 2.34104600  | 2.91359900  |
| H | -5.61058600 | -0.37221100 | 2.58153200  |
| H | -4.09588400 | -0.65053000 | 4.49315300  |
| H | -4.21190300 | 5.00068500  | -3.19139700 |
| H | -6.27705500 | 3.60875000  | -3.36739000 |
| H | -6.78682900 | 1.92943300  | -1.65608300 |
| C | 5.77796200  | -2.89751600 | -0.00348200 |
| C | 6.63379500  | -3.63176300 | -0.83230100 |
| C | 5.47948700  | -3.40001900 | 1.26925200  |
| C | 7.16814300  | -4.84502400 | -0.40209200 |
| H | 6.87936200  | -3.24823500 | -1.81936600 |
| C | 6.01005800  | -4.61376800 | 1.69891700  |
| H | 4.82248700  | -2.82635200 | 1.91945800  |
| C | 6.85552700  | -5.34065000 | 0.86217200  |
| H | 7.83122500  | -5.40323200 | -1.05640900 |
| H | 5.76421200  | -4.99139700 | 2.68755500  |



|   |             |             |             |
|---|-------------|-------------|-------------|
| H | 7.26979700  | -6.28731900 | 1.19577400  |
| C | -6.49982800 | 0.48121600  | 0.37461000  |
| C | -7.66960800 | 0.70909500  | 1.10566900  |
| C | -6.45697200 | -0.58617700 | -0.52826200 |
| C | -8.77914300 | -0.11692000 | 0.93505400  |
| H | -7.70858700 | 1.53754100  | 1.80826200  |
| C | -7.56526200 | -1.41248200 | -0.69700500 |
| H | -5.54760600 | -0.76232700 | -1.09806700 |
| C | -8.72982400 | -1.17842700 | 0.03303200  |
| H | -9.68435000 | 0.07280700  | 1.50449300  |
| H | -7.51782900 | -2.23726300 | -1.40278300 |
| H | -9.59597000 | -1.81978000 | -0.10120500 |
| C | 0.76037600  | -4.32477500 | 1.47700700  |
| C | 0.33346900  | -4.47593600 | 0.11980600  |
| C | -0.94535600 | -4.81897500 | -0.16287700 |
| H | 1.05746600  | -4.39777700 | -0.68175900 |
| C | -2.70316400 | -2.16625100 | -0.39088100 |
| C | -2.44011700 | -1.53832300 | -1.62238000 |
| C | -3.21605200 | -1.79480700 | -2.74863500 |
| C | -4.26393900 | -2.71245700 | -2.69007500 |
| C | -4.54896300 | -3.34140700 | -1.47919200 |
| C | -3.79241400 | -3.06054400 | -0.34701100 |
| H | -1.62345700 | -0.83273000 | -1.71127100 |
| H | -2.98617100 | -1.28638400 | -3.68064200 |
| H | -4.85226600 | -2.93423800 | -3.57591500 |
| H | -5.36114300 | -4.06062200 | -1.41502100 |
| H | -4.04027900 | -3.57518700 | 0.57504800  |
| C | -1.83286200 | -1.92648100 | 0.78244700  |
| C | -2.26843800 | -2.35559600 | 2.01399800  |

|   |             |             |             |
|---|-------------|-------------|-------------|
| H | -3.30028600 | -2.65218400 | 2.19142000  |
| H | -1.69094400 | -2.08091600 | 2.89054000  |
| B | -0.34841400 | -1.16482900 | 0.71175900  |
| O | 0.58941200  | -1.67447400 | -0.26293500 |
| H | 0.30400000  | -1.51572600 | -1.17523900 |
| O | 0.18665800  | -1.18739000 | 2.03855700  |
| C | 1.16492800  | -0.26025400 | 2.45713700  |
| H | 0.87796800  | 0.74499500  | 2.11516500  |
| C | 1.17360500  | -0.26794900 | 3.98042900  |
| H | 1.44218300  | -1.26574600 | 4.34785900  |
| H | 1.89702300  | 0.45351400  | 4.37509100  |
| H | 0.18210400  | -0.01498800 | 4.37004700  |
| C | 2.55061000  | -0.57622700 | 1.90112700  |
| H | 2.90101000  | -1.53961700 | 2.29080200  |
| H | 2.52221100  | -0.63007900 | 0.81004800  |
| H | 3.26661100  | 0.19973200  | 2.20030400  |
| C | -1.58271400 | -4.47033600 | 2.05554100  |
| H | -2.37692300 | -4.67762900 | 2.76485200  |
| C | -1.48433000 | -5.15177600 | -1.48737600 |
| C | -0.95341400 | -4.53024600 | -2.62303500 |
| C | -2.52369200 | -6.07985200 | -1.62453100 |
| C | -1.44592900 | -4.84835400 | -3.88451000 |
| H | -0.18130900 | -3.77373700 | -2.51156600 |
| C | -3.00952500 | -6.39549100 | -2.88830000 |
| H | -2.94511500 | -6.55384700 | -0.74309300 |
| C | -2.47222900 | -5.78194200 | -4.01996500 |
| H | -1.03680400 | -4.35437300 | -4.76051000 |
| H | -3.80970500 | -7.12194200 | -2.99090200 |
| H | -2.85635400 | -6.02776500 | -5.00540400 |

|   |             |             |            |
|---|-------------|-------------|------------|
| O | -1.86136600 | -4.94013700 | 0.84680700 |
| C | -0.22782400 | -4.34478800 | 2.48055800 |
| C | 0.11617600  | -4.23495700 | 3.84011600 |
| H | -0.66444200 | -4.24042700 | 4.59603200 |
| C | 1.44751800  | -4.14739600 | 4.18785400 |
| C | 2.44211700  | -4.12846100 | 3.18741400 |
| H | 1.73442300  | -4.08504900 | 5.23258500 |
| C | 2.10927100  | -4.20241100 | 1.84946900 |
| H | 2.87333600  | -4.16752800 | 1.07769100 |
| H | 3.48601600  | -4.04593100 | 3.47802700 |

**TSB-major**

M06-2X/BSI SCF energy in dichloromethane: -4205.982433 a.u.

M06-2X/BSII SCF energy in dichloromethane: -4207.04699 a.u.

M06-2X/BSII free energy in dichloromethane: -4205.895196 a.u.

|   |             |            |             |
|---|-------------|------------|-------------|
| P | 0.08882200  | 1.21610600 | 0.14559900  |
| O | -0.86559200 | 2.40304400 | -0.51464200 |
| O | 1.38613400  | 2.14216700 | 0.59700200  |
| O | 0.41202600  | 0.29989800 | -0.97976200 |
| O | -0.49051500 | 0.73938900 | 1.44261900  |
| C | 1.81819100  | 3.14472800 | -0.22675700 |
| C | 1.10248400  | 4.32686300 | -0.30750700 |
| C | 1.57680000  | 5.35846600 | -1.18416000 |
| C | 2.81928000  | 5.17692900 | -1.85713200 |
| C | 3.53061800  | 3.96070700 | -1.69935300 |
| C | 3.03997100  | 2.94004400 | -0.92399000 |
| H | -0.12659500 | 6.68883800 | -0.97993900 |
| C | 0.84409400  | 6.55051500 | -1.44380000 |

|   |             |             |             |
|---|-------------|-------------|-------------|
| C | 3.31402600  | 6.20063100  | -2.70887900 |
| H | 4.47074700  | 3.83051900  | -2.23032100 |
| C | 2.59724600  | 7.35065800  | -2.91503200 |
| C | 1.34095000  | 7.51690800  | -2.28315000 |
| H | 4.26988200  | 6.04390600  | -3.20229500 |
| H | 2.97966100  | 8.12608600  | -3.57153100 |
| H | 0.76155100  | 8.41580000  | -2.47166600 |
| C | -0.17031400 | 4.45287200  | 0.45596300  |
| C | -0.42999100 | 5.52039300  | 1.37648700  |
| C | -1.13028000 | 3.47186500  | 0.29851600  |
| C | 0.54634400  | 6.49790300  | 1.71209500  |
| C | -1.70183200 | 5.58896300  | 2.01460100  |
| C | -2.40876900 | 3.53085100  | 0.92044600  |
| C | 0.26186900  | 7.50209000  | 2.60427200  |
| H | 1.53275700  | 6.43551300  | 1.26434700  |
| C | -1.96952900 | 6.64649600  | 2.92495900  |
| C | -2.67772800 | 4.59098700  | 1.75014600  |
| C | -1.01369700 | 7.58724200  | 3.21199300  |
| H | 1.02469300  | 8.23455300  | 2.85088700  |
| H | -2.94831900 | 6.68828800  | 3.39612300  |
| H | -3.64911900 | 4.66764700  | 2.23347500  |
| H | -1.22572200 | 8.38939800  | 3.91213900  |
| C | -3.31664100 | 0.48745700  | 3.78048800  |
| C | -3.04454900 | 1.45385700  | 2.85954200  |
| C | -3.72458500 | 1.49368400  | 1.59738000  |
| C | -4.71566400 | 0.48722200  | 1.31769400  |
| C | -4.94865600 | -0.52664500 | 2.30760100  |
| C | -4.27940200 | -0.52436000 | 3.49594700  |
| C | -3.42119800 | 2.47053700  | 0.63311600  |

|   |             |             |             |
|---|-------------|-------------|-------------|
| C | -5.40472600 | 0.49944600  | 0.08839500  |
| C | -5.09598400 | 1.47792900  | -0.87891000 |
| C | -4.07954200 | 2.45987900  | -0.61140200 |
| C | -3.77423800 | 3.42333500  | -1.62833200 |
| H | -3.00407700 | 4.16300700  | -1.43465100 |
| C | -4.43071500 | 3.42627700  | -2.82393100 |
| C | -5.46258200 | 2.47763800  | -3.07632300 |
| C | -5.78730600 | 1.54516400  | -2.13493100 |
| H | -2.78283500 | 0.47126400  | 4.72586300  |
| H | -2.27865700 | 2.19451600  | 3.05649100  |
| H | -5.66493600 | -1.31254800 | 2.09402300  |
| H | -4.46951100 | -1.30372200 | 4.22808500  |
| H | -4.17885600 | 4.16111800  | -3.58255500 |
| H | -5.99850400 | 2.50561800  | -4.02031000 |
| H | -6.58663900 | 0.83960400  | -2.33170000 |
| C | 2.56012000  | -0.05806600 | -3.91208000 |
| C | 2.70061400  | 0.87381200  | -2.92758300 |
| C | 3.63719400  | 0.69090400  | -1.85759200 |
| C | 4.43502300  | -0.50576800 | -1.83813400 |
| C | 4.24243000  | -1.46692200 | -2.88718100 |
| C | 3.34323400  | -1.24863500 | -3.89001600 |
| C | 3.77786400  | 1.64413800  | -0.83334800 |
| C | 5.36003300  | -0.71776400 | -0.79644900 |
| C | 5.48993400  | 0.23339000  | 0.23548400  |
| C | 4.67233200  | 1.41639300  | 0.22713700  |
| C | 4.80574900  | 2.34975400  | 1.30673800  |
| H | 4.17673700  | 3.23439900  | 1.31161600  |
| C | 5.70137100  | 2.14306500  | 2.31482700  |
| C | 6.54414500  | 0.99372400  | 2.30150200  |

|   |             |             |             |
|---|-------------|-------------|-------------|
| C | 6.44192000  | 0.07445200  | 1.29769400  |
| H | 1.83555300  | 0.09398400  | -4.70592100 |
| H | 2.08039500  | 1.76287800  | -2.92652100 |
| H | 4.82468100  | -2.38201600 | -2.87363600 |
| H | 3.21404800  | -1.98995700 | -4.67309500 |
| H | 5.78386900  | 2.86025600  | 3.12566400  |
| H | 7.27428100  | 0.85430600  | 3.09293700  |
| H | 7.09276300  | -0.79314900 | 1.29250200  |
| C | -6.46775800 | -0.51273000 | -0.18301600 |
| C | -7.63883900 | -0.53273200 | 0.58500600  |
| C | -6.32060600 | -1.45671700 | -1.20628300 |
| C | -8.63086400 | -1.48023600 | 0.34536900  |
| H | -7.76700100 | 0.20130400  | 1.37616900  |
| C | -7.31399000 | -2.40335500 | -1.45016600 |
| H | -5.41948400 | -1.44426300 | -1.81403700 |
| C | -8.47000200 | -2.42086900 | -0.67128700 |
| H | -9.53196400 | -1.48137200 | 0.95125100  |
| H | -7.17940900 | -3.12960100 | -2.24685800 |
| H | -9.24338600 | -3.15998300 | -0.85725500 |
| C | 6.18596000  | -1.95966800 | -0.77297400 |
| C | 7.18899200  | -2.16727600 | -1.72661900 |
| C | 5.96803500  | -2.93921300 | 0.20371900  |
| C | 7.95844400  | -3.32819300 | -1.70601500 |
| H | 7.36324400  | -1.41114300 | -2.48749900 |
| C | 6.73868100  | -4.10069700 | 0.22482000  |
| H | 5.18944500  | -2.78443300 | 0.94904700  |
| C | 7.73560300  | -4.29801100 | -0.72995800 |
| H | 8.73423600  | -3.47268200 | -2.45179700 |
| H | 6.56259300  | -4.85163300 | 0.99021600  |

|   |             |             |             |
|---|-------------|-------------|-------------|
| H | 8.33663900  | -5.20198900 | -0.71248100 |
| C | -0.94085500 | -5.18571000 | 0.12487200  |
| C | -0.53461600 | -5.10748600 | 1.41693400  |
| C | 0.85894300  | -5.16517400 | 1.74781900  |
| C | 1.78360700  | -5.12661100 | 0.68119200  |
| H | 0.63386900  | -5.28397300 | 3.89018700  |
| H | -1.28355400 | -5.08920300 | 2.20195400  |
| C | 1.34076300  | -5.25531600 | 3.06641500  |
| C | 3.17033000  | -5.14405100 | 0.92544100  |
| C | 3.62018900  | -5.23093200 | 2.22612900  |
| C | 2.70214300  | -5.28804100 | 3.29514700  |
| H | 3.86577000  | -5.09258500 | 0.09166100  |
| H | 4.68552600  | -5.25289900 | 2.43315000  |
| H | 3.07442200  | -5.35048200 | 4.31276400  |
| O | -0.02497600 | -5.25561200 | -0.88062100 |
| C | -2.33333300 | -5.30769500 | -0.33230900 |
| C | -3.32112400 | -4.49763200 | 0.23581700  |
| C | -2.67333700 | -6.25239200 | -1.30690700 |
| C | -4.64654200 | -4.64061000 | -0.16478100 |
| H | -3.04412200 | -3.72799600 | 0.95292800  |
| C | -4.00217500 | -6.39768400 | -1.69335500 |
| H | -1.90283100 | -6.87805300 | -1.74795400 |
| C | -4.98915600 | -5.59286800 | -1.12375400 |
| H | -5.40881900 | -3.99812000 | 0.26593500  |
| H | -4.26679900 | -7.13837500 | -2.44173300 |
| H | -6.02482900 | -5.70496300 | -1.43068400 |
| C | 1.21624900  | -1.94929200 | 1.24971600  |
| C | 0.50002900  | -2.08850600 | 2.45119800  |
| C | 1.06679800  | -1.72143300 | 3.66552100  |

|   |             |             |             |
|---|-------------|-------------|-------------|
| C | 2.35086900  | -1.18045400 | 3.70130200  |
| C | 3.06585600  | -1.00693000 | 2.51559200  |
| C | 2.50785200  | -1.39684500 | 1.30315100  |
| H | -0.50945400 | -2.48899000 | 2.42506700  |
| H | 0.50185100  | -1.84589700 | 4.58473600  |
| H | 2.78682800  | -0.87473900 | 4.64796900  |
| H | 4.05377000  | -0.55349700 | 2.53460900  |
| H | 3.04836600  | -1.21675800 | 0.37782300  |
| C | 0.61353500  | -2.30836900 | -0.04121000 |
| C | 1.39186800  | -2.83238700 | -1.04023000 |
| H | 2.47801300  | -2.87193100 | -0.95105300 |
| H | 0.97918500  | -2.92777500 | -2.04146300 |
| B | -0.92674100 | -2.00944400 | -0.34200300 |
| O | -1.76336200 | -1.38239500 | 0.52314400  |
| H | -1.31285700 | -0.69603500 | 1.08308900  |
| O | -1.40122700 | -2.49900500 | -1.52691500 |
| C | -2.68307400 | -2.04281600 | -1.98054200 |
| H | -3.38886400 | -2.10440200 | -1.14332300 |
| C | -2.58101200 | -0.59784300 | -2.44899300 |
| H | -1.82963200 | -0.51628100 | -3.24264800 |
| H | -3.54356900 | -0.25344100 | -2.84562000 |
| H | -2.28631700 | 0.06257700  | -1.62825500 |
| C | -3.12703600 | -2.97438200 | -3.09256000 |
| H | -2.44086700 | -2.89980700 | -3.94414000 |
| H | -3.13751300 | -4.01117900 | -2.74609700 |
| H | -4.13287500 | -2.71029000 | -3.43704400 |
| C | 1.25367100  | -4.99075400 | -0.63557500 |
| H | 1.87397100  | -5.14205200 | -1.51324100 |



**TSB-minor**

M06-2X/BSI SCF energy in dichloromethane: -4205.978583 a.u.

M06-2X/BSII SCF energy in dichloromethane: -4207.043656 a.u.

M06-2X/BSII free energy in dichloromethane: -4205.893742 a.u.

|   |            |             |             |
|---|------------|-------------|-------------|
| P | 1.37472100 | -0.29185900 | -0.01865000 |
| O | 2.79805700 | 0.27766700  | -0.65333800 |
| O | 1.93149300 | -1.74117900 | 0.57145400  |
| O | 0.47557700 | -0.48285100 | -1.18535400 |
| O | 1.00887100 | 0.49828700  | 1.19930000  |
| C | 2.73920700 | -2.48385900 | -0.24537100 |
| C | 4.07445700 | -2.14105000 | -0.38295000 |
| C | 4.89428700 | -2.92055300 | -1.26453600 |
| C | 4.33765700 | -4.07330000 | -1.88978100 |
| C | 2.97283200 | -4.39684000 | -1.67825900 |
| C | 2.16321600 | -3.61204800 | -0.89480900 |
| H | 6.66605300 | -1.67193500 | -1.14993600 |
| C | 6.23779200 | -2.57152100 | -1.57871400 |
| C | 5.14538600 | -4.86377200 | -2.75146100 |
| H | 2.55854900 | -5.27065600 | -2.17620100 |
| C | 6.44548700 | -4.51545600 | -3.01128700 |
| C | 6.98959900 | -3.34661500 | -2.42642300 |
| H | 4.70279100 | -5.74497200 | -3.20889900 |
| H | 7.05503000 | -5.12222100 | -3.67371700 |
| H | 8.01075300 | -3.05765300 | -2.65665300 |
| C | 4.57953900 | -0.93156400 | 0.32806000  |
| C | 5.70786000 | -0.95124000 | 1.21214200  |
| C | 3.88909000 | 0.25545700  | 0.16842800  |
| C | 6.40586200 | -2.14478700 | 1.54508500  |

|   |            |             |             |
|---|------------|-------------|-------------|
| C | 6.13469500 | 0.26814800  | 1.81350800  |
| C | 4.27041500 | 1.47107500  | 0.80632300  |
| C | 7.48653600 | -2.11893800 | 2.39158300  |
| H | 6.06497100 | -3.08852300 | 1.13245900  |
| C | 7.26574200 | 0.26493900  | 2.67375400  |
| C | 5.40019300 | 1.46215000  | 1.58655800  |
| C | 7.93471300 | -0.89924600 | 2.95315700  |
| H | 8.00124200 | -3.04342000 | 2.63571800  |
| H | 7.58288700 | 1.20739700  | 3.11317200  |
| H | 5.72348900 | 2.37525400  | 2.08143600  |
| H | 8.79617300 | -0.89254700 | 3.61373800  |
| C | 1.91035900 | 2.85970200  | 4.07603400  |
| C | 2.64975500 | 2.42482600  | 3.01706400  |
| C | 2.63015300 | 3.11184500  | 1.75757000  |
| C | 1.75971300 | 4.24780900  | 1.61736400  |
| C | 1.01422100 | 4.68243500  | 2.76489100  |
| C | 1.09002700 | 4.01819200  | 3.95328600  |
| C | 3.40303600 | 2.67854600  | 0.66266100  |
| C | 1.64609700 | 4.90026900  | 0.37519900  |
| C | 2.41909800 | 4.46651000  | -0.71939300 |
| C | 3.31623300 | 3.35263500  | -0.56884800 |
| C | 4.10199200 | 2.95125700  | -1.69889800 |
| H | 4.79603800 | 2.12462200  | -1.58253000 |
| C | 3.99596700 | 3.58779200  | -2.90023300 |
| C | 3.08171000 | 4.66908700  | -3.06025000 |
| C | 2.31986300 | 5.08909200  | -2.00920600 |
| H | 1.93764200 | 2.31742000  | 5.01631400  |
| H | 3.25157800 | 1.52833300  | 3.11098200  |
| H | 0.38537900 | 5.56180400  | 2.67637500  |

|   |             |             |             |
|---|-------------|-------------|-------------|
| H | 0.51891800  | 4.36555600  | 4.80928500  |
| H | 4.60224300  | 3.26845300  | -3.74238300 |
| H | 2.98894500  | 5.15518800  | -4.02710700 |
| H | 1.61786700  | 5.90556500  | -2.14280500 |
| C | -0.58995900 | -2.75262200 | -4.03929500 |
| C | 0.26855400  | -2.99951200 | -3.01007700 |
| C | -0.17311200 | -3.64890800 | -1.80934500 |
| C | -1.56398000 | -3.99818000 | -1.69506300 |
| C | -2.43201800 | -3.72542200 | -2.80692400 |
| C | -1.96110200 | -3.13139100 | -3.94068900 |
| C | 0.70833900  | -3.92166700 | -0.74655600 |
| C | -2.04699900 | -4.58994600 | -0.51400600 |
| C | -1.16425100 | -4.87274600 | 0.54533500  |
| C | 0.22690400  | -4.52606500 | 0.43024600  |
| C | 1.09267700  | -4.80826900 | 1.53716500  |
| H | 2.14306800  | -4.54567600 | 1.45848600  |
| C | 0.62065200  | -5.39870900 | 2.67314200  |
| C | -0.75641500 | -5.74831500 | 2.78445500  |
| C | -1.61861900 | -5.48745900 | 1.75921800  |
| H | -0.23365700 | -2.25679400 | -4.93704900 |
| H | 1.30498700  | -2.69075900 | -3.08186600 |
| H | -3.47643100 | -4.01248800 | -2.73657400 |
| H | -2.63122400 | -2.94149300 | -4.77427500 |
| H | 1.29427300  | -5.60357500 | 3.49958100  |
| H | -1.11890300 | -6.21685700 | 3.69455600  |
| H | -2.66858800 | -5.74603700 | 1.85156800  |
| C | 0.67636400  | 6.02341800  | 0.21150000  |
| C | 1.11215500  | 7.33851600  | 0.01708700  |
| C | -0.70011700 | 5.76455800  | 0.24877400  |

|   |             |             |             |
|---|-------------|-------------|-------------|
| C | 0.19219200  | 8.37353500  | -0.14270700 |
| H | 2.17835100  | 7.54864700  | -0.00930800 |
| C | -1.61870100 | 6.79918600  | 0.08593500  |
| H | -1.03379800 | 4.74090600  | 0.40324000  |
| C | -1.17523200 | 8.10631400  | -0.11089900 |
| H | 0.54551300  | 9.38987800  | -0.29031100 |
| H | -2.68330100 | 6.58306200  | 0.11260500  |
| H | -1.89204400 | 8.91226100  | -0.23679300 |
| C | -3.51204400 | -4.83710200 | -0.36277100 |
| C | -4.07526300 | -6.10333300 | -0.54186100 |
| C | -4.34986200 | -3.76068700 | -0.04779300 |
| C | -5.45158200 | -6.28678800 | -0.40869300 |
| H | -3.43250600 | -6.94428500 | -0.78838200 |
| C | -5.72387200 | -3.94185400 | 0.08535600  |
| H | -3.90757900 | -2.77680800 | 0.09799800  |
| C | -6.27799200 | -5.20890700 | -0.09638400 |
| H | -5.87899400 | -7.27491200 | -0.55047600 |
| H | -6.35765000 | -3.09476000 | 0.33436500  |
| H | -7.34887900 | -5.35606300 | 0.00634200  |
| C | -5.12875200 | 0.82196600  | 0.70877600  |
| C | -5.04154600 | 2.07962700  | 0.19318800  |
| C | -5.05026700 | 2.28905300  | -1.22010200 |
| C | -4.93039300 | 1.15272500  | -2.05077300 |
| H | -5.27419900 | 4.43736200  | -1.18861600 |
| H | -5.04395800 | 2.93408600  | 0.86024800  |
| C | -5.18544900 | 3.55658600  | -1.81754100 |
| C | -4.92621200 | 1.27235300  | -3.45541800 |
| C | -5.08103500 | 2.51892300  | -4.01727100 |
| C | -5.21265700 | 3.65903800  | -3.19283200 |

|   |             |             |             |
|---|-------------|-------------|-------------|
| H | -4.81548100 | 0.38240900  | -4.06852000 |
| H | -5.09754500 | 2.63355400  | -5.09583400 |
| H | -5.32539800 | 4.63502100  | -3.65495900 |
| O | -5.09628700 | -0.24978000 | -0.13202400 |
| C | -5.29508000 | 0.43889600  | 2.11556400  |
| C | -5.63168400 | 1.39976800  | 3.07811400  |
| C | -5.08855600 | -0.88886300 | 2.51107600  |
| C | -5.74320000 | 1.03752800  | 4.41504100  |
| H | -5.81924300 | 2.42887900  | 2.78891700  |
| C | -5.21008000 | -1.24609000 | 3.84860800  |
| H | -4.80676800 | -1.63917600 | 1.78096400  |
| C | -5.53223800 | -0.28486100 | 4.80463200  |
| H | -6.00229800 | 1.78952700  | 5.15367100  |
| H | -5.03585300 | -2.27619700 | 4.14372900  |
| H | -5.61946500 | -0.56398800 | 5.85019300  |
| C | -2.01554100 | -0.10097700 | 1.05503300  |
| C | -2.12474700 | 0.75512300  | 2.16281200  |
| C | -1.94537100 | 0.27799800  | 3.45464400  |
| C | -1.63145700 | -1.06590500 | 3.66282800  |
| C | -1.49795100 | -1.92497200 | 2.57305100  |
| C | -1.68570700 | -1.44589200 | 1.27982200  |
| H | -2.35788000 | 1.80516100  | 2.00018300  |
| H | -2.04260700 | 0.95402100  | 4.29930100  |
| H | -1.47639200 | -1.43865300 | 4.67121900  |
| H | -1.21560800 | -2.96300500 | 2.72663700  |
| H | -1.50192700 | -2.09809600 | 0.42948900  |
| C | -2.12464800 | 0.42714700  | -0.31536200 |
| C | -2.53392400 | -0.36466700 | -1.34801700 |
| H | -2.70269400 | -1.43205800 | -1.20772100 |

|   |             |             |             |
|---|-------------|-------------|-------------|
| H | -2.40293300 | -0.02714200 | -2.37270800 |
| B | -1.46613100 | 1.83105600  | -0.67312400 |
| O | -0.49467400 | 2.39196400  | 0.08695900  |
| H | -0.02617400 | 1.75447900  | 0.69001500  |
| O | -1.88299800 | 2.44286100  | -1.82518300 |
| C | -0.97288200 | 3.35021900  | -2.46827800 |
| H | -0.40717600 | 3.89081900  | -1.70160300 |
| C | -0.00840800 | 2.52957100  | -3.31106000 |
| H | -0.56737400 | 1.92820600  | -4.03827200 |
| H | 0.68461100  | 3.17961100  | -3.85427600 |
| H | 0.57240500  | 1.85210600  | -2.67451000 |
| C | -1.77681800 | 4.33995000  | -3.28847400 |
| H | -2.35081500 | 3.82337000  | -4.06598400 |
| H | -2.47283800 | 4.89689300  | -2.65307800 |
| H | -1.10316800 | 5.05686600  | -3.76989600 |
| C | -4.78423700 | -0.10139600 | -1.40947600 |
| H | -4.82688700 | -1.03796100 | -1.95657100 |

### TSC-major

M06-2X/BSI SCF energy in dichloromethane: -4205.987003 a.u.

M06-2X/BSII SCF energy in dichloromethane: -4207.05046 a.u.

M06-2X/BSII free energy in dichloromethane: -4205.900742 a.u.

|   |             |             |             |
|---|-------------|-------------|-------------|
| P | -0.55880900 | 1.07624500  | -0.57469700 |
| O | -1.79603100 | 2.14796500  | -0.78827000 |
| O | 0.40912700  | 1.95050400  | 0.45257200  |
| O | 0.10999400  | 0.89530900  | -1.88964800 |
| O | -1.04087000 | -0.07152800 | 0.25808300  |
| C | 0.67096300  | 3.25887100  | 0.12988100  |

|   |             |            |             |
|---|-------------|------------|-------------|
| C | -0.31624300 | 4.20771900 | 0.32447300  |
| C | -0.06922100 | 5.56182300 | -0.07166900 |
| C | 1.22382800  | 5.91319000 | -0.54923800 |
| C | 2.22524100  | 4.91572100 | -0.64228700 |
| C | 1.97556000  | 3.60083000 | -0.32283600 |
| H | -2.07262300 | 6.31342300 | 0.29354100  |
| C | -1.07053000 | 6.57175800 | -0.03220600 |
| C | 1.49089100  | 7.25597000 | -0.93086100 |
| H | 3.21746100  | 5.20414200 | -0.98142200 |
| C | 0.51036000  | 8.21146700 | -0.86216600 |
| C | -0.78703000 | 7.85821600 | -0.41771400 |
| H | 2.48864400  | 7.50519100 | -1.28285700 |
| H | 0.71984300  | 9.23523100 | -1.15650800 |
| H | -1.56696600 | 8.61326300 | -0.38593600 |
| C | -1.61031200 | 3.78437100 | 0.92184300  |
| C | -2.11815700 | 4.37817100 | 2.12404100  |
| C | -2.31279800 | 2.74906400 | 0.33508700  |
| C | -1.39817600 | 5.35056300 | 2.87301900  |
| C | -3.38331700 | 3.95327100 | 2.61684300  |
| C | -3.57718300 | 2.31351500 | 0.81903700  |
| C | -1.92688200 | 5.88899100 | 4.02018200  |
| H | -0.41314500 | 5.65910200 | 2.53962800  |
| C | -3.91025900 | 4.53703600 | 3.80027500  |
| C | -4.09147300 | 2.93550700 | 1.93246300  |
| C | -3.20217900 | 5.48871400 | 4.48719900  |
| H | -1.35811900 | 6.62572400 | 4.57951500  |
| H | -4.88255600 | 4.20298400 | 4.15273300  |
| H | -5.06077400 | 2.62642300 | 2.31651700  |
| H | -3.60825700 | 5.92692400 | 5.39359300  |

|   |             |             |             |
|---|-------------|-------------|-------------|
| C | -4.30520900 | -1.38756900 | 2.81069700  |
| C | -4.00859600 | -0.25113200 | 2.11740800  |
| C | -4.66027200 | 0.05748200  | 0.87675700  |
| C | -5.60985400 | -0.88628900 | 0.35318100  |
| C | -5.90959900 | -2.05685900 | 1.12940500  |
| C | -5.28406200 | -2.29798200 | 2.31677400  |
| C | -4.37499700 | 1.23813300  | 0.16255000  |
| C | -6.19028900 | -0.67078800 | -0.91115000 |
| C | -5.85804300 | 0.47949900  | -1.65274000 |
| C | -4.95466300 | 1.45394200  | -1.10287000 |
| C | -4.69399000 | 2.64343300  | -1.85968800 |
| H | -4.02956300 | 3.39490100  | -1.44678900 |
| C | -5.26410300 | 2.84518400  | -3.08213900 |
| C | -6.15087700 | 1.87476900  | -3.63181000 |
| C | -6.43996300 | 0.73639500  | -2.93849900 |
| H | -3.78863900 | -1.60606100 | 3.74042300  |
| H | -3.24690000 | 0.42599400  | 2.48698100  |
| H | -6.62991500 | -2.76986100 | 0.74178500  |
| H | -5.51638100 | -3.19578700 | 2.88183600  |
| H | -5.04707100 | 3.75122200  | -3.63956600 |
| H | -6.60416300 | 2.04987000  | -4.60283000 |
| H | -7.12847900 | 0.00863500  | -3.35427800 |
| C | 3.71629700  | 2.55691200  | -4.08352500 |
| C | 3.11813200  | 2.80528100  | -2.88335300 |
| C | 3.70857500  | 2.36575000  | -1.65106200 |
| C | 4.94971400  | 1.64040400  | -1.70776900 |
| C | 5.54617000  | 1.40956900  | -2.99343100 |
| C | 4.95359800  | 1.85315500  | -4.13898500 |
| C | 3.09604700  | 2.61796200  | -0.40684900 |



|   |              |             |             |
|---|--------------|-------------|-------------|
| C | 5.53425800   | 1.14629500  | -0.52495800 |
| C | 4.86626800   | 1.30618100  | 0.70627300  |
| C | 3.63993100   | 2.05907800  | 0.76776100  |
| C | 3.02124100   | 2.24538200  | 2.04865400  |
| H | 2.11331700   | 2.83386500  | 2.11480100  |
| C | 3.54686900   | 1.69315200  | 3.17934100  |
| C | 4.75481400   | 0.94173100  | 3.11830800  |
| C | 5.39959100   | 0.77204300  | 1.92810200  |
| H | 3.24286700   | 2.88387800  | -5.00412300 |
| H | 2.16284700   | 3.31695600  | -2.84827300 |
| H | 6.47791600   | 0.85610200  | -3.04483000 |
| H | 5.41752900   | 1.65846700  | -5.10118600 |
| H | 3.05103500   | 1.83623300  | 4.13434400  |
| H | 5.17075000   | 0.51835300  | 4.02746100  |
| H | 6.33297000   | 0.22033700  | 1.89431500  |
| C | -7.14375400  | -1.67555700 | -1.46902900 |
| C | -8.45459100  | -1.75990100 | -0.98789300 |
| C | -6.73199200  | -2.55744800 | -2.47477300 |
| C | -9.33573200  | -2.71076500 | -1.49868400 |
| H | -8.78017200  | -1.07729500 | -0.20714700 |
| C | -7.61308700  | -3.50948200 | -2.98462900 |
| H | -5.71585100  | -2.49347000 | -2.85605300 |
| C | -8.91653600  | -3.58805000 | -2.49748500 |
| H | -10.35077800 | -2.76543200 | -1.11648200 |
| H | -7.27926200  | -4.18875700 | -3.76346700 |
| H | -9.60375400  | -4.32885700 | -2.89492100 |
| C | 6.87213700   | 0.48602600  | -0.58137900 |
| C | 8.01616900   | 1.23777200  | -0.87510200 |
| C | 7.01104300   | -0.88576200 | -0.35192800 |

|   |             |             |             |
|---|-------------|-------------|-------------|
| C | 9.26758700  | 0.62884200  | -0.93535100 |
| H | 7.91945600  | 2.30508700  | -1.05691500 |
| C | 8.26104000  | -1.49812900 | -0.41612600 |
| H | 6.12725500  | -1.47732000 | -0.13383900 |
| C | 9.39392700  | -0.74076900 | -0.70741500 |
| H | 10.14563300 | 1.22563000  | -1.16339600 |
| H | 8.34547500  | -2.56799600 | -0.24480400 |
| H | 10.36960600 | -1.21442400 | -0.75921700 |
| C | 0.28103600  | -3.62395200 | -1.05955800 |
| C | 1.37687700  | -4.43188100 | -1.06527200 |
| C | 2.65865700  | -3.91729200 | -1.44597400 |
| C | 2.78275700  | -2.51905100 | -1.58132300 |
| H | 3.68530800  | -5.81073400 | -1.58996200 |
| H | 1.26443100  | -5.49420300 | -0.88223400 |
| C | 3.77164400  | -4.73519800 | -1.71447200 |
| C | 3.98772000  | -1.94359700 | -2.01312000 |
| C | 5.05633900  | -2.76665600 | -2.31645100 |
| C | 4.95220300  | -4.16037200 | -2.14561000 |
| H | 4.06091200  | -0.86399900 | -2.12006900 |
| H | 5.98672500  | -2.33575000 | -2.67249500 |
| H | 5.80877200  | -4.78979000 | -2.36651900 |
| O | 0.42352000  | -2.28757100 | -1.24178900 |
| C | -1.12407600 | -4.04555100 | -0.97374000 |
| C | -1.46888300 | -5.40403800 | -1.02126700 |
| C | -2.13354300 | -3.07915700 | -0.87575200 |
| C | -2.80211800 | -5.79038200 | -0.95437200 |
| H | -0.70281600 | -6.16585400 | -1.12292700 |
| C | -3.46537900 | -3.47523200 | -0.83456000 |
| H | -1.87803500 | -2.02451900 | -0.82386600 |

|   |             |             |             |
|---|-------------|-------------|-------------|
| C | -3.80569800 | -4.82596200 | -0.86403400 |
| H | -3.05704800 | -6.84512200 | -0.98714900 |
| H | -4.24011900 | -2.71988000 | -0.77214200 |
| H | -4.84996800 | -5.12356300 | -0.82509000 |
| C | 3.07598300  | -3.36929400 | 1.54808200  |
| C | 2.97230000  | -4.76160700 | 1.75571600  |
| C | 4.10505200  | -5.55756000 | 1.84201100  |
| C | 5.37519800  | -4.98680700 | 1.73405000  |
| C | 5.50120800  | -3.61210700 | 1.54714900  |
| C | 4.36611100  | -2.81437000 | 1.45198900  |
| H | 1.98906100  | -5.21188600 | 1.82462900  |
| H | 4.00053500  | -6.62813500 | 1.98900100  |
| H | 6.26129100  | -5.61052300 | 1.80454200  |
| H | 6.48530100  | -3.15516500 | 1.48885500  |
| H | 4.48883700  | -1.74006200 | 1.35141400  |
| C | 1.87925200  | -2.54007200 | 1.38560200  |
| C | 1.96718300  | -1.31319800 | 0.73132900  |
| H | 2.93449300  | -0.84545100 | 0.55066600  |
| H | 1.14502800  | -0.60915900 | 0.83563900  |
| B | 0.44116700  | -2.93750800 | 1.97419900  |
| O | -0.67517400 | -2.23778700 | 1.69972600  |
| H | -0.67550100 | -1.44705700 | 1.10627700  |
| O | 0.38138900  | -3.98569700 | 2.84639800  |
| C | -0.85200800 | -4.30154700 | 3.50904900  |
| H | -1.30934900 | -3.36389000 | 3.84569600  |
| C | -1.80279400 | -5.00771000 | 2.55417600  |
| H | -1.32936600 | -5.91142600 | 2.15246400  |
| H | -2.71511700 | -5.30417300 | 3.08313400  |
| H | -2.08272300 | -4.35042900 | 1.72578100  |

|   |             |             |             |
|---|-------------|-------------|-------------|
| C | -0.49424900 | -5.16160500 | 4.70817800  |
| H | -0.03084400 | -6.09771600 | 4.37691300  |
| H | 0.21024000  | -4.63943400 | 5.36222400  |
| H | -1.39116900 | -5.40454000 | 5.28578700  |
| C | 1.64693400  | -1.72383200 | -1.18271700 |
| H | 1.57862600  | -0.67366000 | -1.46669600 |

### TSC-minor

M06-2X/BSI SCF energy in dichloromethane: -4205.983129 a.u.

M06-2X/BSII SCF energy in dichloromethane: -4207.047277 a.u.

M06-2X/BSII free energy in dichloromethane: -4205.898863 a.u.

|   |             |             |             |
|---|-------------|-------------|-------------|
| P | -1.20184600 | 0.82095500  | -0.31977400 |
| O | -2.76221500 | 1.29796300  | -0.57441200 |
| O | -0.67049500 | 2.09756900  | 0.58965700  |
| O | -0.52538300 | 0.78615900  | -1.64429500 |
| O | -1.18097900 | -0.34445000 | 0.62214600  |
| C | -1.03886000 | 3.36539100  | 0.22348500  |
| C | -2.31878900 | 3.80546800  | 0.50376800  |
| C | -2.69523600 | 5.12967100  | 0.10219500  |
| C | -1.71176900 | 5.98065900  | -0.47822300 |
| C | -0.40262600 | 5.48502500  | -0.70590300 |
| C | -0.05942600 | 4.19269900  | -0.39172700 |
| H | -4.79763000 | 4.97533800  | 0.61879200  |
| C | -4.02368500 | 5.62445600  | 0.22375000  |
| C | -2.06550100 | 7.30343100  | -0.85916700 |
| H | 0.33194100  | 6.14047200  | -1.16846100 |
| C | -3.34849200 | 7.76018100  | -0.70187700 |
| C | -4.33925600 | 6.90194500  | -0.16723000 |

|   |             |             |             |
|---|-------------|-------------|-------------|
| H | -1.29674000 | 7.94031800  | -1.28920100 |
| H | -3.61227700 | 8.77052900  | -0.99869500 |
| H | -5.36092100 | 7.25686600  | -0.07114800 |
| C | -3.28062000 | 2.86210500  | 1.13703900  |
| C | -3.97888900 | 3.16346800  | 2.35174700  |
| C | -3.48104300 | 1.62832700  | 0.54870200  |
| C | -3.72725200 | 4.34141300  | 3.10718200  |
| C | -4.93292300 | 2.23178000  | 2.85079000  |
| C | -4.43519500 | 0.68860000  | 1.03119100  |
| C | -4.41358600 | 4.59336600  | 4.26934200  |
| H | -2.97156700 | 5.03994100  | 2.76322800  |
| C | -5.63813100 | 2.52739900  | 4.04819800  |
| C | -5.15364800 | 1.01403200  | 2.15575900  |
| C | -5.39027100 | 3.68421500  | 4.74229100  |
| H | -4.20047600 | 5.49553700  | 4.83477200  |
| H | -6.37073900 | 1.80965700  | 4.40816300  |
| H | -5.89604000 | 0.31869200  | 2.54085900  |
| H | -5.93011300 | 3.90025600  | 5.65905900  |
| C | -3.16270200 | -3.06036700 | 2.66382200  |
| C | -3.55814000 | -1.87187300 | 2.12559300  |
| C | -4.26417600 | -1.81722000 | 0.87817300  |
| C | -4.53643000 | -3.05245000 | 0.19231000  |
| C | -4.09999700 | -4.27943000 | 0.79594000  |
| C | -3.44024500 | -4.28475500 | 1.98977400  |
| C | -4.66256200 | -0.59551200 | 0.30566300  |
| C | -5.18027300 | -3.03659400 | -1.05908100 |
| C | -5.56145700 | -1.81198700 | -1.64033200 |
| C | -5.30363300 | -0.57855500 | -0.94814200 |
| C | -5.72710900 | 0.64696600  | -1.56038600 |

|   |             |             |             |
|---|-------------|-------------|-------------|
| H | -5.54696100 | 1.58287400  | -1.04158700 |
| C | -6.35325100 | 0.65517500  | -2.77205100 |
| C | -6.61062900 | -0.56718800 | -3.45682700 |
| C | -6.23158100 | -1.75672500 | -2.90776200 |
| H | -2.61660900 | -3.07683800 | 3.60196000  |
| H | -3.31437500 | -0.94133000 | 2.62533000  |
| H | -4.29511700 | -5.21369300 | 0.27973300  |
| H | -3.11030100 | -5.22368700 | 2.42519100  |
| H | -6.66457200 | 1.59547200  | -3.21685400 |
| H | -7.11806400 | -0.54767500 | -4.41660900 |
| H | -6.44156500 | -2.68519000 | -3.42817300 |
| C | 1.02722900  | 3.32467000  | -4.41004700 |
| C | 0.68154100  | 3.53602800  | -3.10902800 |
| C | 1.64098200  | 3.39992000  | -2.05030400 |
| C | 2.97498900  | 2.97284900  | -2.38110800 |
| C | 3.30083200  | 2.79776700  | -3.76939800 |
| C | 2.36560800  | 2.97047500  | -4.74669300 |
| C | 1.29789500  | 3.66123000  | -0.71149400 |
| C | 3.92751600  | 2.77487100  | -1.35826200 |
| C | 3.56853700  | 3.00794600  | -0.01212400 |
| C | 2.24196700  | 3.46116900  | 0.31142800  |
| C | 1.90970000  | 3.69149600  | 1.68675600  |
| H | 0.91299400  | 4.04525500  | 1.93061700  |
| C | 2.81448300  | 3.46693000  | 2.68205900  |
| C | 4.12193100  | 2.99944400  | 2.36752800  |
| C | 4.48461800  | 2.78503300  | 1.07000100  |
| H | 0.28359700  | 3.42723800  | -5.19431000 |
| H | -0.33926300 | 3.79619900  | -2.85342100 |
| H | 4.31679300  | 2.53451200  | -4.04065100 |

|   |             |             |             |
|---|-------------|-------------|-------------|
| H | 2.63935500  | 2.83606100  | -5.78896200 |
| H | 2.53919400  | 3.63975300  | 3.71798600  |
| H | 4.83262700  | 2.80685900  | 3.16587600  |
| H | 5.48096100  | 2.42387000  | 0.84635900  |
| C | -5.44480100 | -4.31975400 | -1.77561800 |
| C | -6.47338500 | -5.16959000 | -1.35508400 |
| C | -4.66711300 | -4.69097900 | -2.87841300 |
| C | -6.72148300 | -6.36589200 | -2.02447400 |
| H | -7.07961600 | -4.88744300 | -0.49828100 |
| C | -4.91377400 | -5.88863600 | -3.54685400 |
| H | -3.87108700 | -4.03142600 | -3.21549400 |
| C | -5.94180800 | -6.72814500 | -3.12182500 |
| H | -7.52570300 | -7.01429000 | -1.68940800 |
| H | -4.30351800 | -6.16418200 | -4.40178700 |
| H | -6.13561100 | -7.66021200 | -3.64416300 |
| C | 5.30530500  | 2.31185600  | -1.69958700 |
| C | 6.42210300  | 3.10651400  | -1.41305700 |
| C | 5.50864200  | 1.07116000  | -2.31941000 |
| C | 7.70693600  | 2.67121400  | -1.73059200 |
| H | 6.27786000  | 4.07369100  | -0.93884500 |
| C | 6.79185900  | 0.63831900  | -2.64583400 |
| H | 4.64935400  | 0.44384500  | -2.54914900 |
| C | 7.89607900  | 1.43654400  | -2.34954300 |
| H | 8.56061300  | 3.30142000  | -1.49979200 |
| H | 6.92847900  | -0.32191300 | -3.13469900 |
| H | 8.89696800  | 1.10054000  | -2.60356800 |
| C | 3.72506600  | -3.12846000 | -0.70811600 |
| C | 2.80081400  | -4.02133300 | -0.26406700 |
| C | 1.41695600  | -3.86109400 | -0.60185000 |

|   |             |             |             |
|---|-------------|-------------|-------------|
| C | 1.02861900  | -2.62917900 | -1.17018400 |
| H | 0.74920900  | -5.81714700 | 0.01488300  |
| H | 3.13262700  | -4.90960500 | 0.26247600  |
| C | 0.44973500  | -4.86100400 | -0.40388500 |
| C | -0.31262300 | -2.38014600 | -1.50523200 |
| C | -1.25009300 | -3.37099200 | -1.28751000 |
| C | -0.86691200 | -4.61119500 | -0.74519500 |
| H | -0.58702400 | -1.41505800 | -1.92092700 |
| H | -2.29185100 | -3.19053100 | -1.53489100 |
| H | -1.61912900 | -5.37910900 | -0.59134000 |
| O | 3.33531500  | -2.03050900 | -1.41407100 |
| C | 5.17961000  | -3.23005300 | -0.54401200 |
| C | 5.70482200  | -3.82834700 | 0.60726200  |
| C | 6.03991700  | -2.67341100 | -1.49700100 |
| C | 7.08163500  | -3.87491900 | 0.79551500  |
| H | 5.03548600  | -4.20898400 | 1.37404800  |
| C | 7.41586900  | -2.72932100 | -1.30488000 |
| H | 5.62917800  | -2.20209700 | -2.38490600 |
| C | 7.93890600  | -3.32682300 | -0.15884800 |
| H | 7.48569000  | -4.32109200 | 1.69885300  |
| H | 8.08225600  | -2.30025300 | -2.04710600 |
| H | 9.01315200  | -3.35945100 | -0.00524500 |
| C | 4.01372800  | -1.00116400 | 1.69546800  |
| C | 4.50669600  | -1.35513600 | 2.96718000  |
| C | 5.84073100  | -1.14646300 | 3.29709700  |
| C | 6.72435500  | -0.60490600 | 2.36243400  |
| C | 6.25800000  | -0.25535400 | 1.09611800  |
| C | 4.91896800  | -0.43809400 | 0.77496300  |
| H | 3.83223500  | -1.78057500 | 3.69907300  |



|   |             |             |              |
|---|-------------|-------------|--------------|
| H | 6.19398000  | -1.41281400 | 4.28876400   |
| H | 7.76879000  | -0.45545400 | 2.62036800   |
| H | 6.93315400  | 0.16349700  | 0.35320700   |
| H | 4.58190600  | -0.15447700 | -0.21671800  |
| C | 2.59696700  | -1.17860400 | 1.34590300   |
| C | 2.04143400  | -0.44523000 | 0.30942600   |
| H | 2.58297600  | 0.39013300  | -0.13193700  |
| H | 0.96248000  | -0.36241600 | 0.26349600   |
| B | 1.60573100  | -2.17863700 | 2.12210900   |
| O | 0.27200500  | -2.18191400 | 1.92640400   |
| H | -0.18048500 | -1.48601800 | 1.38957800   |
| O | 2.16064000  | -3.07529300 | 2.98942300   |
| C | 1.33503900  | -3.86991000 | 3.85104900   |
| H | 0.47206700  | -3.26716600 | 4.15619200   |
| C | 0.84394500  | -5.10303200 | 3.11178200   |
| H | 1.69648700  | -5.69088200 | 2.75107900   |
| H | 0.24801900  | -5.73461600 | 3.77921400   |
| H | 0.22115500  | -4.81429800 | 2.26116100   |
| C | 2.17552300  | -4.21921800 | 5.06715700   |
| H | 3.06044700  | -4.79006000 | 4.76453100   |
| H | 2.50673000  | -3.31224100 | 5.58246900   |
| H | 1.59596400  | -4.82422800 | 5.77107900   |
| C | 2.05189000  | -1.63403700 | -1.349668000 |
| H | 1.85896000  | -0.77849600 | -1.992442000 |

7.729  
7.708  
7.377  
7.356  
7.339  
7.321  
7.284  
7.266  
7.256  
7.248  
7.237  
7.212  
7.193  
6.581  
6.290

4.368  
4.352  
4.337  
4.321  
4.306

1.548  
1.312  
1.297  
1.257  
1.163  
1.148

-0.000

Current Data Parameters  
NAME lsx-1-P-Cl-H  
EXPNO 1  
PROCNO 1

F2 - Acquisition Parameters

Date\_ 20211228  
Time 19.52  
INSTRUM spect  
PROBHD 5 mm PABBO BB/  
PULPROG zg30  
TD 65536  
SOLVENT CDC13  
NS 6  
DS 2  
SWH 8012.820 Hz  
FIDRES 0.122266 Hz  
AQ 4.0894465 sec  
RG 142.88  
DW 62.400 usec  
DE 6.50 usec  
TE 295.2 K  
D1 1.00000000 sec  
TD0 1

==== CHANNEL f1 =====  
SFO1 400.1324710 MHz  
NUC1 1H  
P1 14.50 usec  
PLW1 11.99499989 W

F2 - Processing parameters

SI 65536  
SF 400.1300115 MHz  
WDW EM  
SSB 0  
LB 0.30 Hz  
GB 0  
PC 1.00

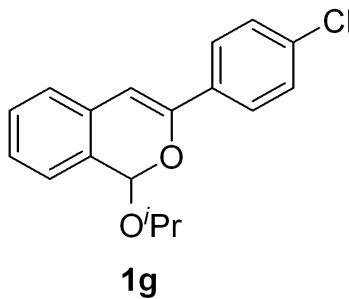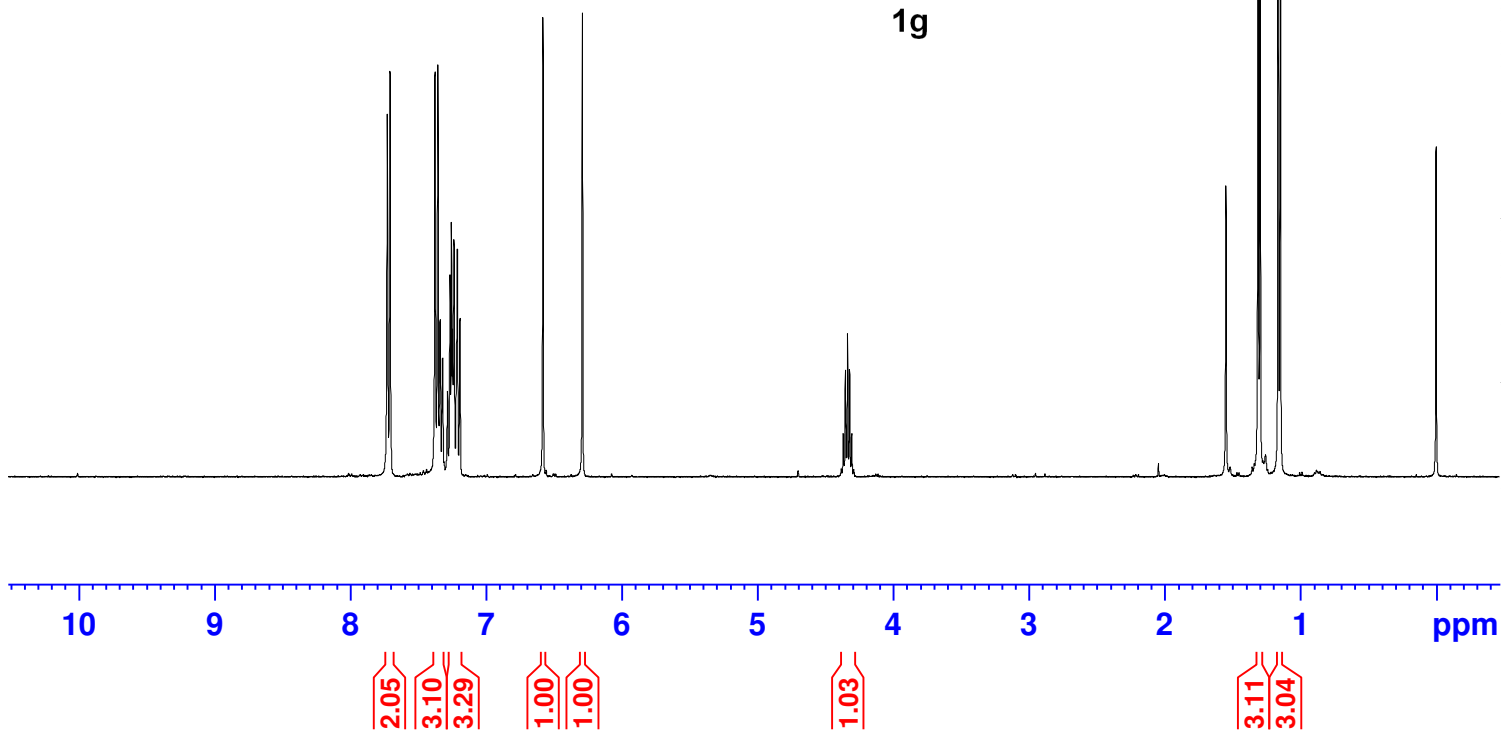

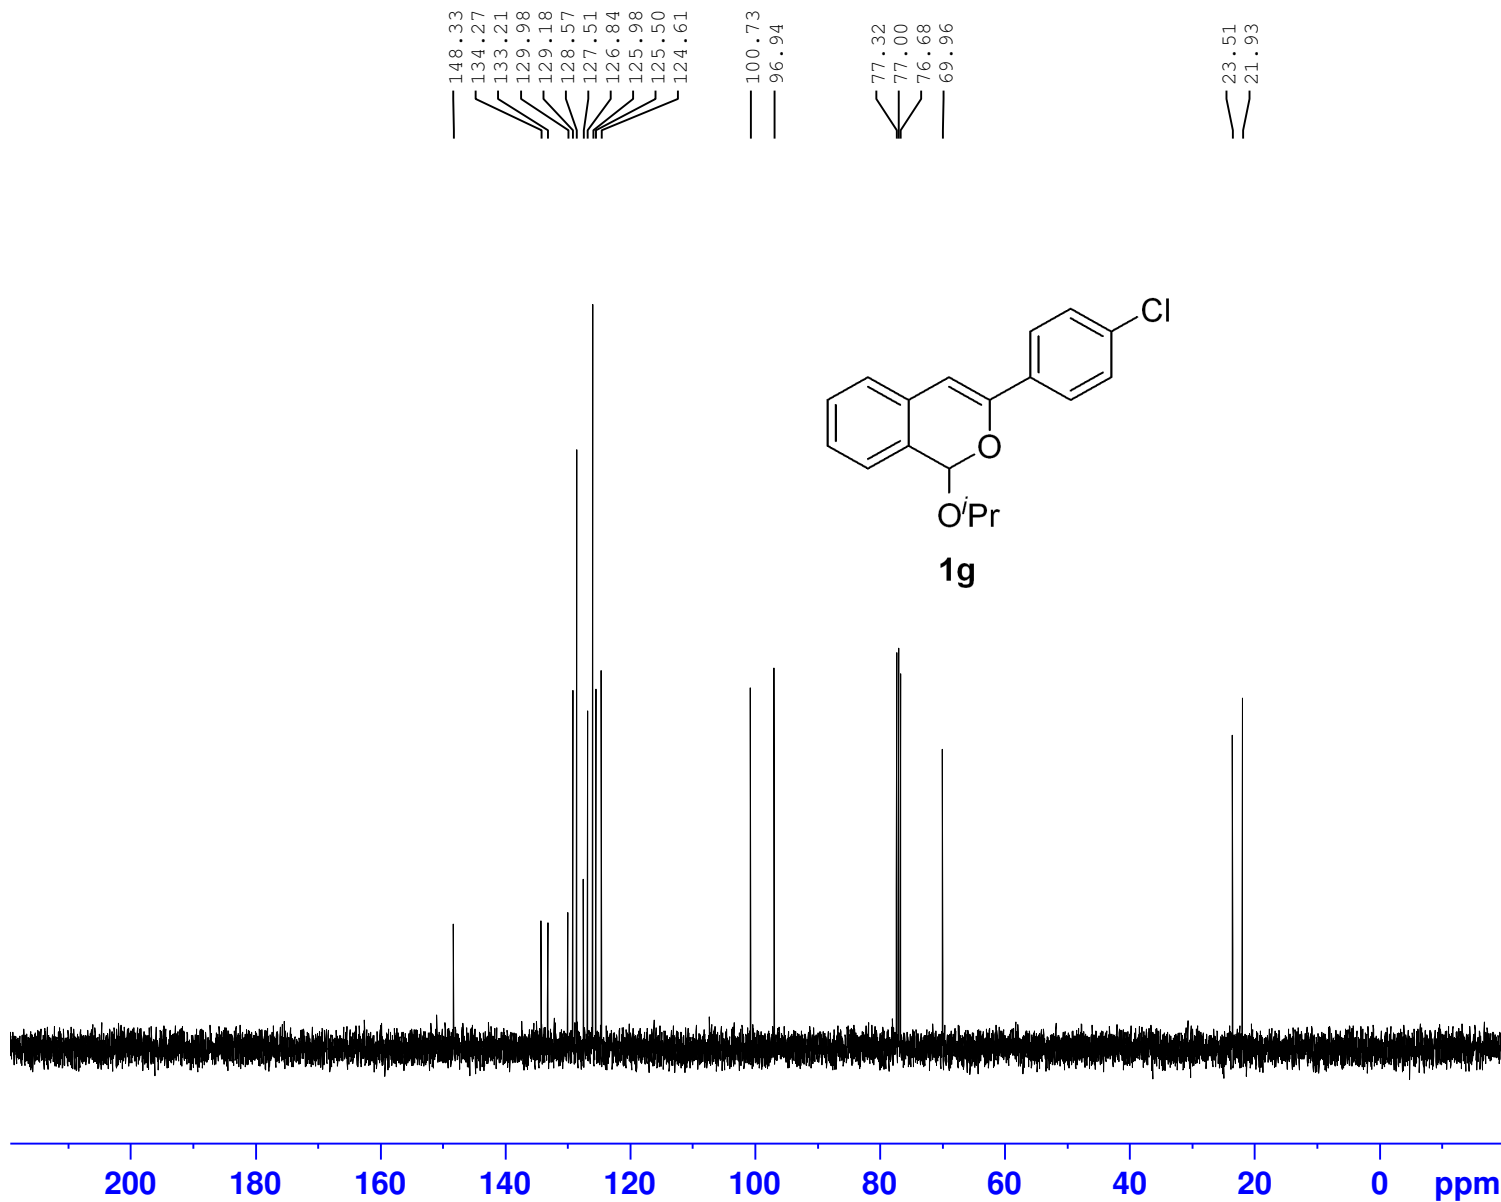

Current Data Parameters  
 NAME lsx-project3-1c-c  
 EXPNO 1  
 PROCNO 1

F2 - Acquisition Parameters  
 Date\_ 20220722  
 Time 20.04  
 INSTRUM spect  
 PROBHD 5 mm DUL 13C-1  
 PULPROG zgpg30  
 TD 65536  
 SOLVENT CDCl3  
 NS 20  
 DS 1  
 SWH 24038.461 Hz  
 FIDRES 0.366798 Hz  
 AQ 1.3631488 sec  
 RG 2050  
 DW 20.800 usec  
 DE 6.00 usec  
 TE 293.1 K  
 D1 2.00000000 sec  
 D11 0.03000000 sec  
 TD0 1

==== CHANNEL f1 =====  
 NUC1 13C  
 P1 40.00 usec  
 PL1 -3.00 dB  
 PL1W 60.64365387 W  
 SFO1 100.6228298 MHz

==== CHANNEL f2 =====  
 CPDPRG[2] waltz16  
 NUC2 1H  
 PCPD2 80.00 usec  
 PL2 -1.00 dB  
 PL12 14.39 dB  
 PL13 18.00 dB  
 PL2W 12.17476940 W  
 PL12W 0.35193357 W  
 PL13W 0.15327126 W  
 SFO2 400.1316005 MHz

F2 - Processing parameters  
 SI 32768  
 SF 100.6127795 MHz  
 WDW EM  
 SSB 0  
 LB 1.00 Hz  
 GB 0  
 PC 1.40

7.866  
7.845  
7.668  
7.647  
7.375  
7.372  
7.357  
7.353  
7.339  
7.335  
7.324  
7.321  
7.306  
7.303  
7.288  
7.284  
7.254  
7.244  
7.234  
7.215  
6.706  
6.303

4.350  
4.334  
4.319  
4.303  
4.288

1.309  
1.294  
1.150  
1.134

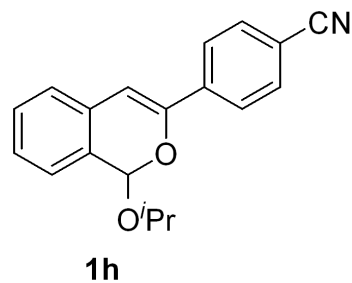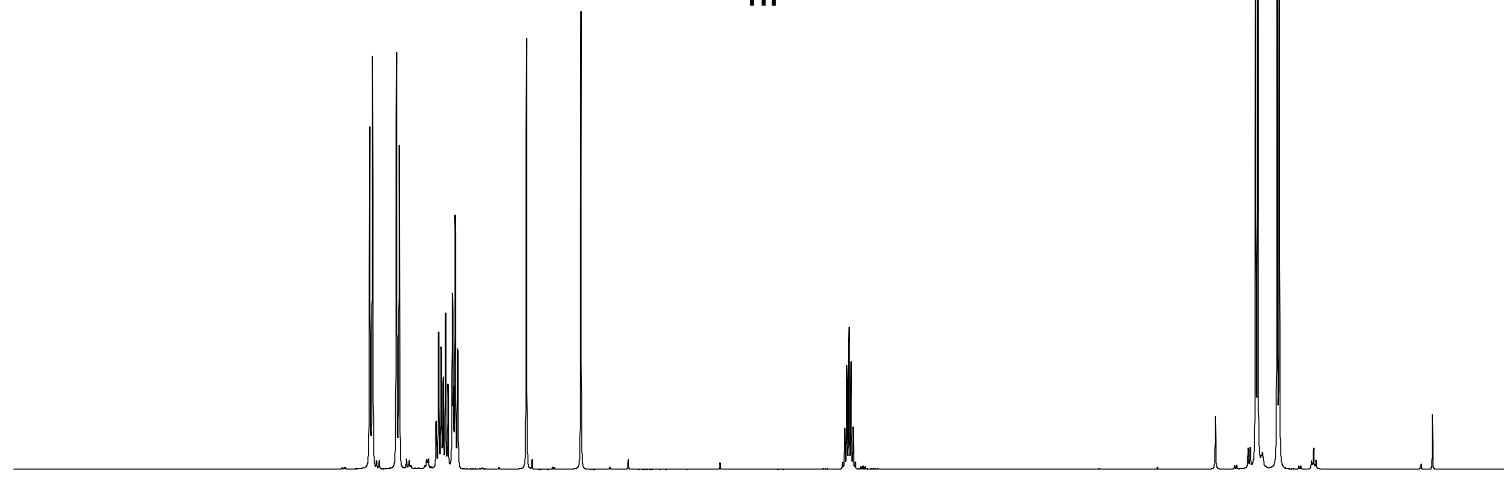

2.02  
1.99  
2.06  
2.11  
1.01  
1.00

1.02

3.06  
3.02

Current Data Parameters  
NAME lsx-project3-ld-h  
EXPNO 1  
PROCNO 1

F2 - Acquisition Parameters  
Date\_ 20220722  
Time 20.09  
INSTRUM spect  
PROBHD 5 mm DUL 13C-1  
PULPROG zg30  
TD 65536  
SOLVENT CDC13  
NS 6  
DS 2  
SWH 8223.685 Hz  
FIDRES 0.125483 Hz  
AQ 3.9845889 sec  
RG 161  
DW 60.800 usec  
DE 6.00 usec  
TE 292.9 K  
D1 1.00000000 sec  
TD0 1

===== CHANNEL f1 =====  
NUC1 1H  
P1 15.80 usec  
PL1 -1.00 dB  
PL1W 12.17476940 W  
SFO1 400.1324710 MHz

F2 - Processing parameters  
SI 32768  
SF 400.1300159 MHz  
WDW EM  
SSB 0  
LB 0.30 Hz  
GB 0  
PC 1.00

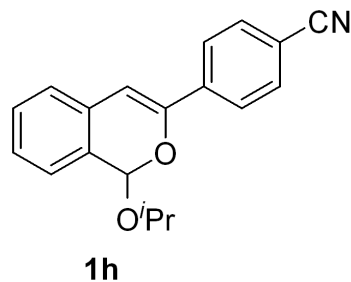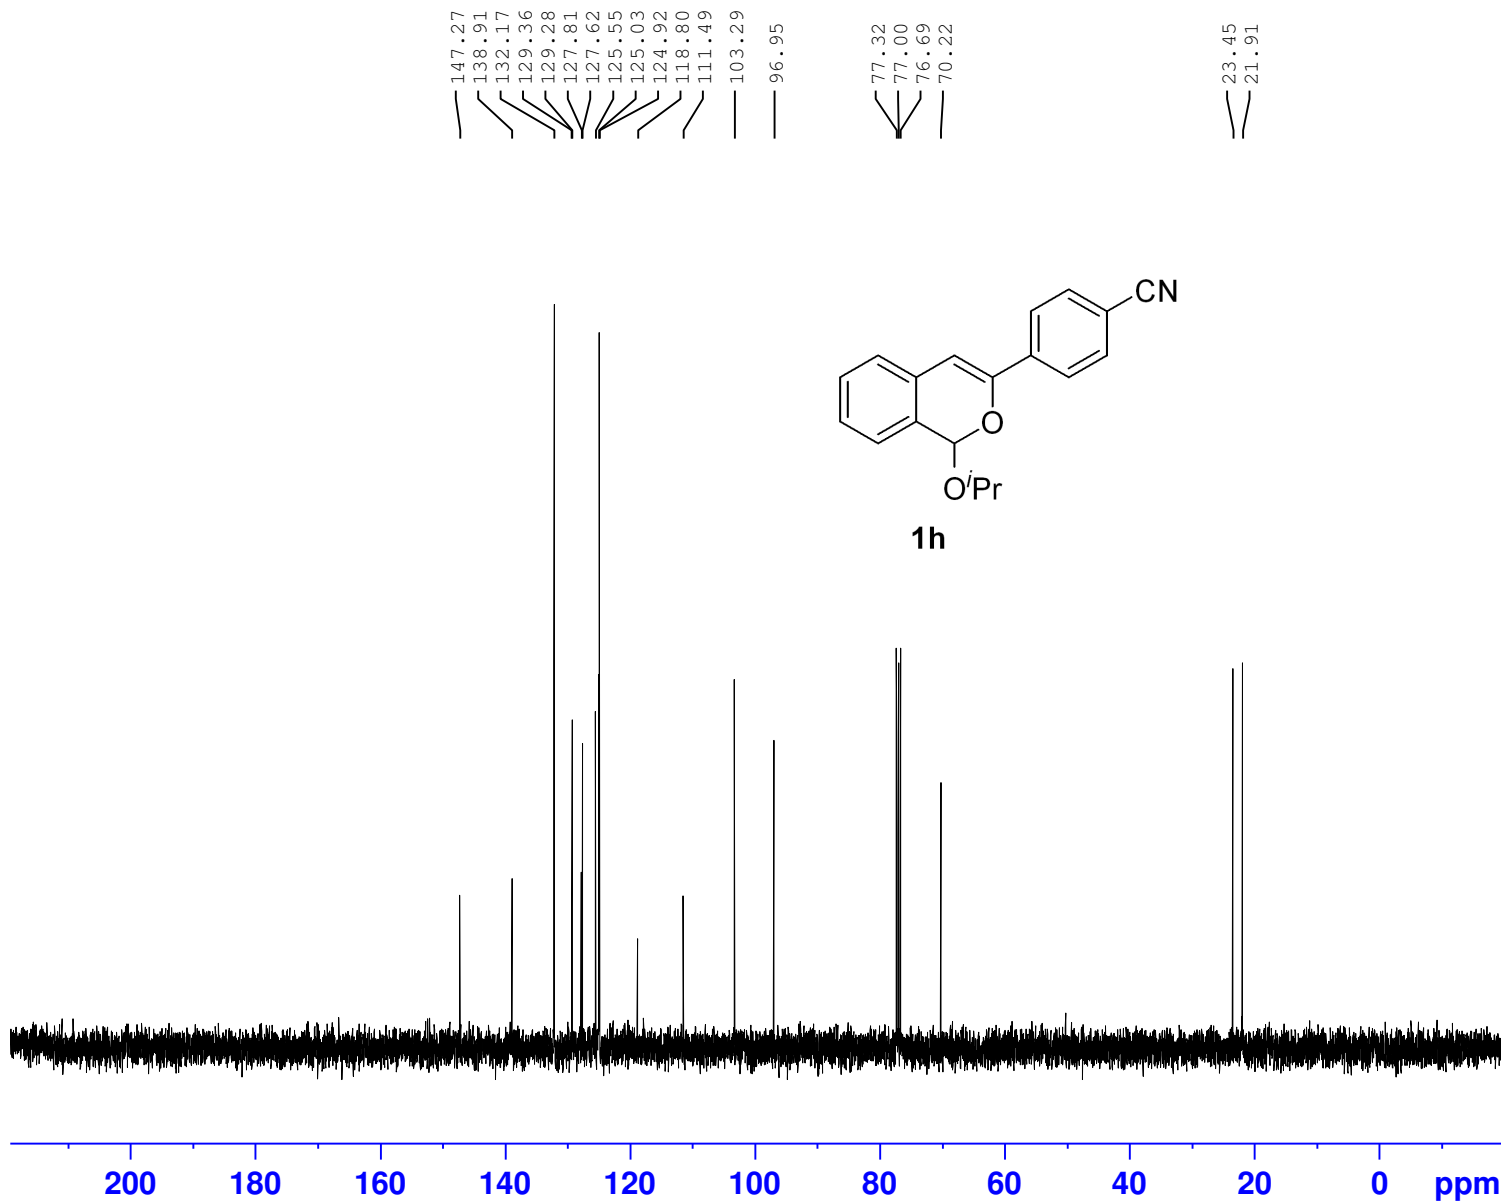

Current Data Parameters  
 NAME lsx-project3-1d-c  
 EXPNO 1  
 PROCNO 1

F2 - Acquisition Parameters  
 Date\_ 20220722  
 Time 20.07  
 INSTRUM spect  
 PROBHD 5 mm DUL 13C-1  
 PULPROG zgpg30  
 TD 65536  
 SOLVENT CDCl3  
 NS 25  
 DS 1  
 SWH 24038.461 Hz  
 FIDRES 0.366798 Hz  
 AQ 1.3631488 sec  
 RG 2050  
 DW 20.800 usec  
 DE 6.00 usec  
 TE 293.1 K  
 D1 2.00000000 sec  
 D11 0.03000000 sec  
 TD0 1

===== CHANNEL f1 =====  
 NUC1 13C  
 P1 40.00 usec  
 PL1 -3.00 dB  
 PL1W 60.64365387 W  
 SFO1 100.6228298 MHz

===== CHANNEL f2 =====  
 CPDPRG[2] waltz16  
 NUC2 1H  
 PCPD2 80.00 usec  
 PL2 -1.00 dB  
 PL12 14.39 dB  
 PL13 18.00 dB  
 PL2W 12.17476940 W  
 PL12W 0.35193357 W  
 PL13W 0.15327126 W  
 SFO2 400.1316005 MHz

F2 - Processing parameters  
 SI 32768  
 SF 100.6127810 MHz  
 WDW EM  
 SSB 0  
 LB 1.00 Hz  
 GB 0  
 PC 1.40

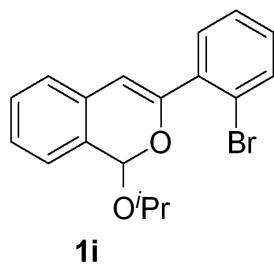

7.616  
7.614  
7.596  
7.594  
7.521  
7.517  
7.502  
7.498  
7.317  
7.314  
7.296  
7.283  
7.278  
7.264  
7.261  
7.246  
7.243  
7.225  
7.221  
7.207  
7.203  
7.170  
7.166  
7.150  
7.131  
6.332  
6.278

4.327  
4.311  
4.296  
4.280  
4.265

1.274  
1.259  
1.214  
1.199

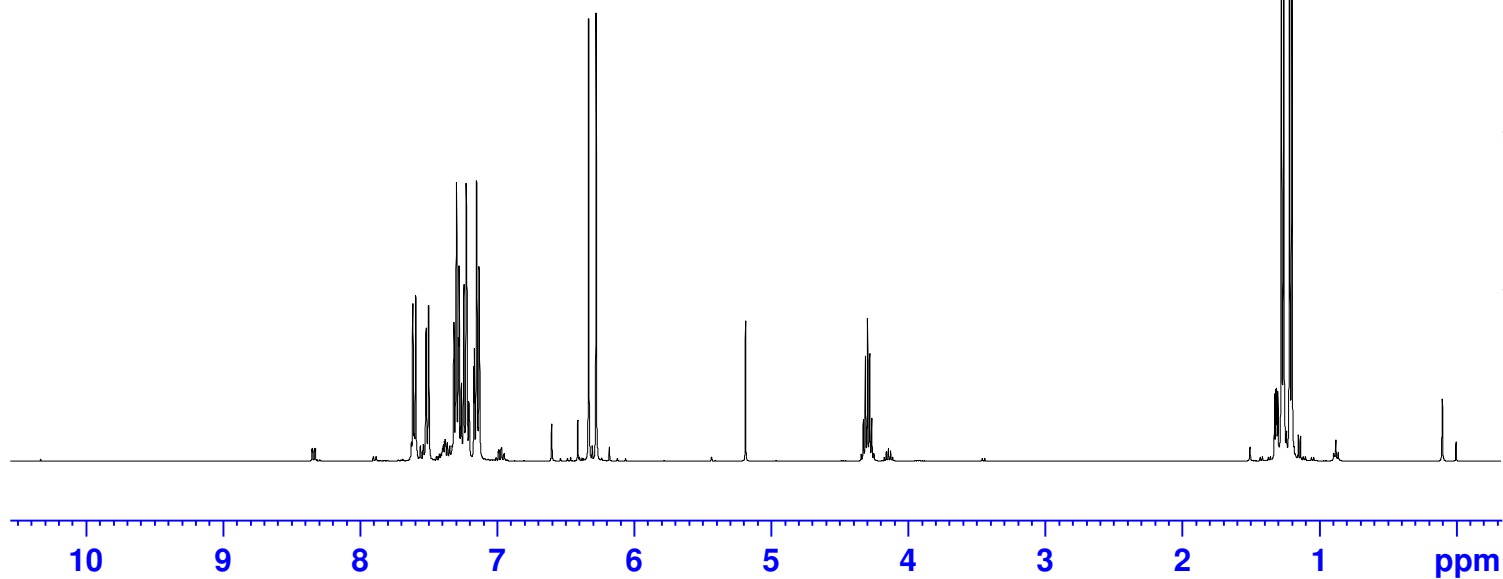

1.11  
0.99  
4.44  
2.17

1.00  
1.03

1.08

3.19  
3.09

Current Data Parameters  
NAME lsx-project3-1e-h-fr  
EXPNO 1  
PROCNO 1

F2 - Acquisition Parameters  
Date\_ 20220723  
Time 16.25  
INSTRUM spect  
PROBHD 5 mm PABBO BB/  
PULPROG zg30  
TD 65536  
SOLVENT CDC13  
NS 10  
DS 2  
SWH 8012.820 Hz  
FIDRES 0.122266 Hz  
AQ 4.0894465 sec  
RG 15.71  
DW 62.400 usec  
DE 6.50 usec  
TE 295.4 K  
D1 1.00000000 sec  
TD0 1

===== CHANNEL f1 =====  
SFO1 400.1324710 MHz  
NUC1 1H  
P1 14.50 usec  
PLW1 11.99499989 W

F2 - Processing parameters  
SI 65536  
SF 400.1300481 MHz  
WDW EM  
SSB 0  
LB 0.30 Hz  
GB 0  
PC 1.00

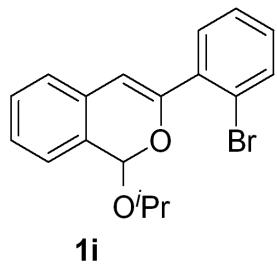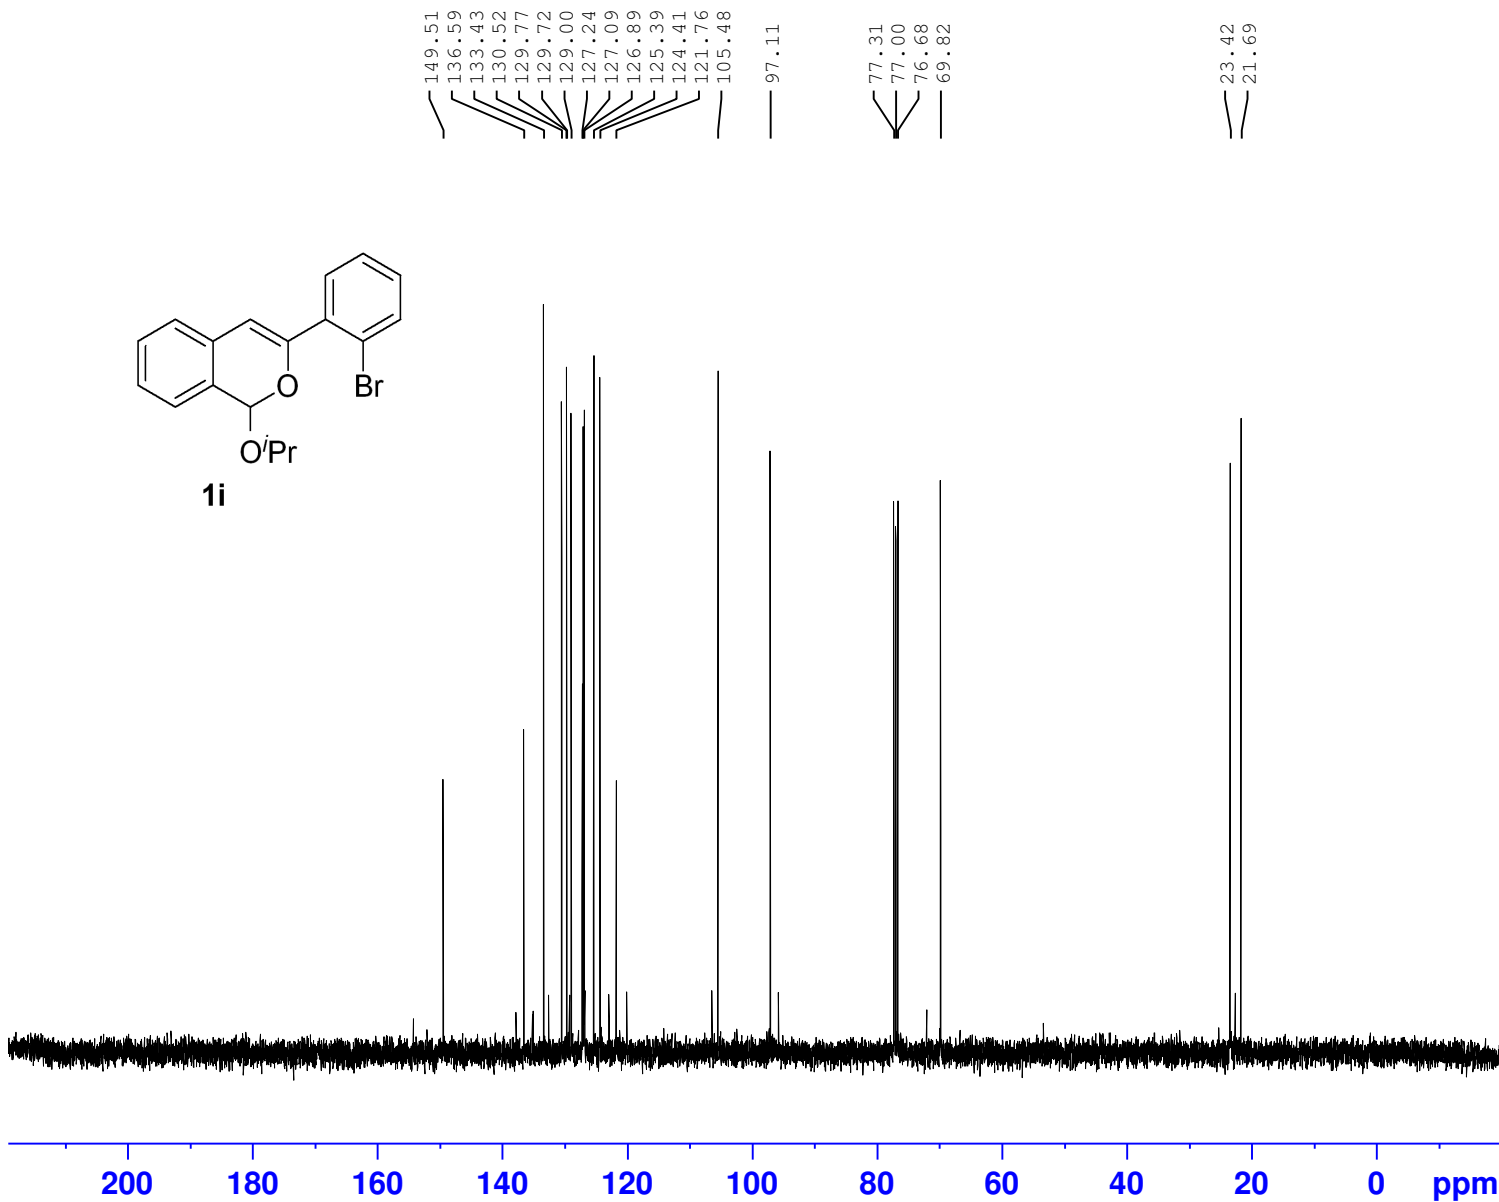

Current Data Parameters  
 NAME lsx-project3-1e-c-fr  
 EXPNO 1  
 PROCNO 1

F2 - Acquisition Parameters  
 Date\_ 20220723  
 Time 16.27  
 INSTRUM spect  
 PROBHD 5 mm PABBO BB/  
 PULPROG zgpg30  
 TD 65536  
 SOLVENT CDC13  
 NS 10  
 DS 2  
 SWH 24038.461 Hz  
 FIDRES 0.366798 Hz  
 AQ 1.3631488 sec  
 RG 196.92  
 DW 20.800 usec  
 DE 6.50 usec  
 TE 295.8 K  
 D1 2.00000000 sec  
 D11 0.03000000 sec  
 TD0 1

===== CHANNEL f1 =====  
 SFO1 100.6228298 MHz  
 NUC1 13C  
 P1 9.70 usec  
 PLW1 46.98899841 W

===== CHANNEL f2 =====  
 SFO2 400.1316005 MHz  
 NUC2 1H  
 CPDPRG[2] waltz16  
 PCPD2 90.00 usec  
 PLW2 11.99499989 W  
 PLW12 0.34213999 W  
 PLW13 0.27713001 W

F2 - Processing parameters  
 SI 32768  
 SF 100.6127927 MHz  
 WDW EM  
 SSB 0  
 LB 1.00 Hz  
 GB 0  
 PC 1.40

3sjwei 4699 lsx-7-84-h-fr 1h cdcl3

7.409  
7.405  
7.397  
7.393  
7.340  
7.333  
7.316  
7.311  
7.293  
7.285  
7.271  
7.268  
7.254  
7.250  
7.236  
7.229  
7.225  
7.207  
7.203  
7.183  
7.175  
7.149  
7.061  
7.049  
7.044  
7.032  
6.461  
6.236  
4.398  
4.378  
4.357  
4.336  
4.316  
1.306  
1.286  
1.216  
1.195

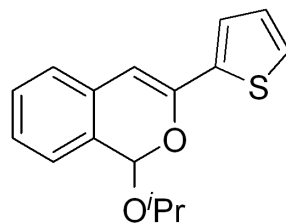

1k

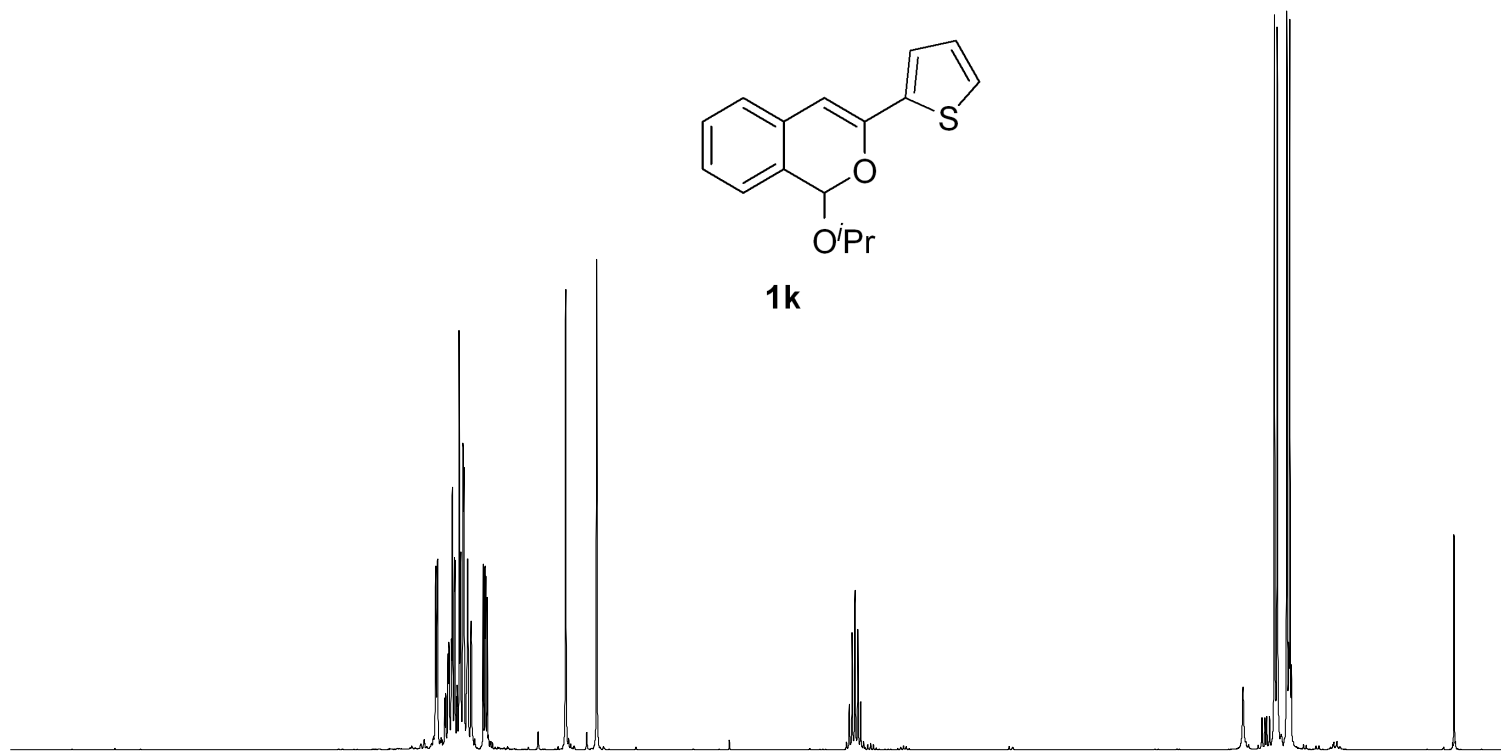

Current Data Parameters  
NAME 1g  
EXPNO 4699  
PROCNO 1

F2 - Acquisition Parameters

Date\_ 20210719  
Time 9.26  
INSTRUM spect  
PROBHD 5 mm PABBO BB-  
PULPROG zg30  
TD 65536  
SOLVENT CDC13  
NS 16  
DS 2  
SWH 6009.615 Hz  
FIDRES 0.091699 Hz  
AQ 5.4525952 sec  
RG 114  
DW 83.200 usec  
DE 6.50 usec  
TE 296.2 K  
D1 1.00000000 sec  
TD0 1

==== CHANNEL f1 =====

SFO1 300.1318534 MHz  
NUC1 1H  
P1 10.00 usec  
PLW1 14.00000000 W

F2 - Processing parameters

SI 65536  
SF 300.1300145 MHz  
WDW EM  
SSB 0  
LB 0.30 Hz  
GB 0  
PC 1.00

10 9 8 7 6 5 4 3 2 1 ppm

1.09  
5.41  
1.06  
1.00  
1.02  
1.05  
3.14  
3.11



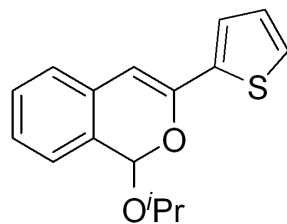

1k

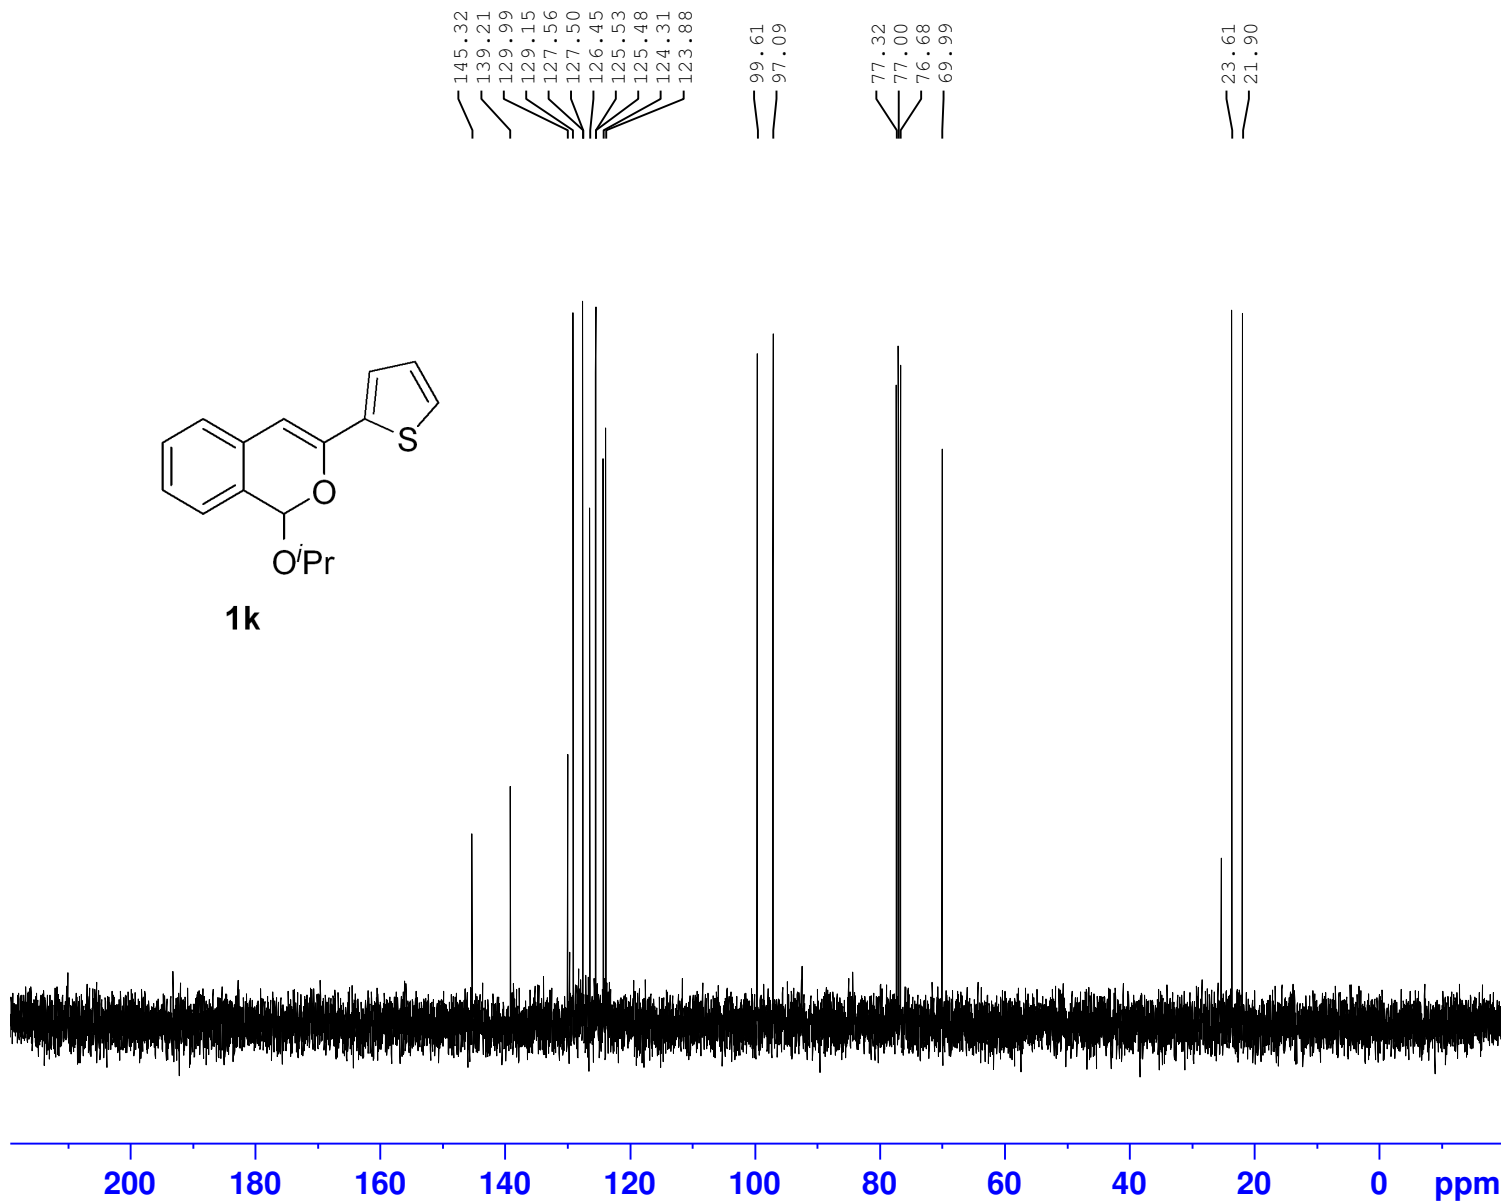

Current Data Parameters  
 NAME lsx-project3-1g-c  
 EXPNO 1  
 PROCNO 1

F2 - Acquisition Parameters  
 Date\_ 20220722  
 Time 20.20  
 INSTRUM spect  
 PROBHD 5 mm DUL 13C-1  
 PULPROG zgpg30  
 TD 65536  
 SOLVENT CDCl3  
 NS 26  
 DS 1  
 SWH 24038.461 Hz  
 FIDRES 0.366798 Hz  
 AQ 1.3631488 sec  
 RG 2050  
 DW 20.800 usec  
 DE 6.00 usec  
 TE 293.1 K  
 D1 2.00000000 sec  
 D11 0.03000000 sec  
 TD0 1

===== CHANNEL f1 =====  
 NUC1 13C  
 P1 40.00 usec  
 PL1 -3.00 dB  
 PL1W 60.64365387 W  
 SFO1 100.6228298 MHz

===== CHANNEL f2 =====  
 CPDPRG[2] waltz16  
 NUC2 1H  
 PCPD2 80.00 usec  
 PL2 -1.00 dB  
 PL12 14.39 dB  
 PL13 18.00 dB  
 PL2W 12.17476940 W  
 PL12W 0.35193357 W  
 PL13W 0.15327126 W  
 SFO2 400.1316005 MHz

F2 - Processing parameters  
 SI 32768  
 SF 100.6127824 MHz  
 WDW EM  
 SSB 0  
 LB 1.00 Hz  
 GB 0  
 PC 1.40

7.791  
7.772  
7.429  
7.412  
7.393  
7.377  
7.360  
7.352  
7.342  
7.251  
7.212  
7.199  
7.192  
7.178  
6.955  
6.949  
6.933  
6.927  
6.912  
6.904  
6.898  
6.880  
6.874  
6.544  
6.294

4.388  
4.373  
4.357  
4.341  
4.326

1.311  
1.296  
1.173  
1.157

Current Data Parameters  
NAME lsx-1-7f-h  
EXPNO 1  
PROCNO 1

F2 - Acquisition Parameters  
Date\_ 20211228  
Time 19.37  
INSTRUM spect  
PROBHD 5 mm PABBO BB/  
PULPROG zg30  
TD 65536  
SOLVENT CDCl3  
NS 7  
DS 2  
SWH 8012.820 Hz  
FIDRES 0.122266 Hz  
AQ 4.0894465 sec  
RG 112.31  
DW 62.400 usec  
DE 6.50 usec  
TE 294.9 K  
D1 1.00000000 sec  
TD0 1

==== CHANNEL f1 =====  
SFO1 400.1324710 MHz  
NUC1 1H  
P1 14.50 usec  
PLW1 11.99499989 W

F2 - Processing parameters  
SI 65536  
SF 400.1300135 MHz  
WDW EM  
SSB 0  
LB 0.30 Hz  
GB 0  
PC 1.00

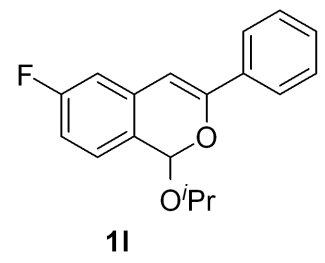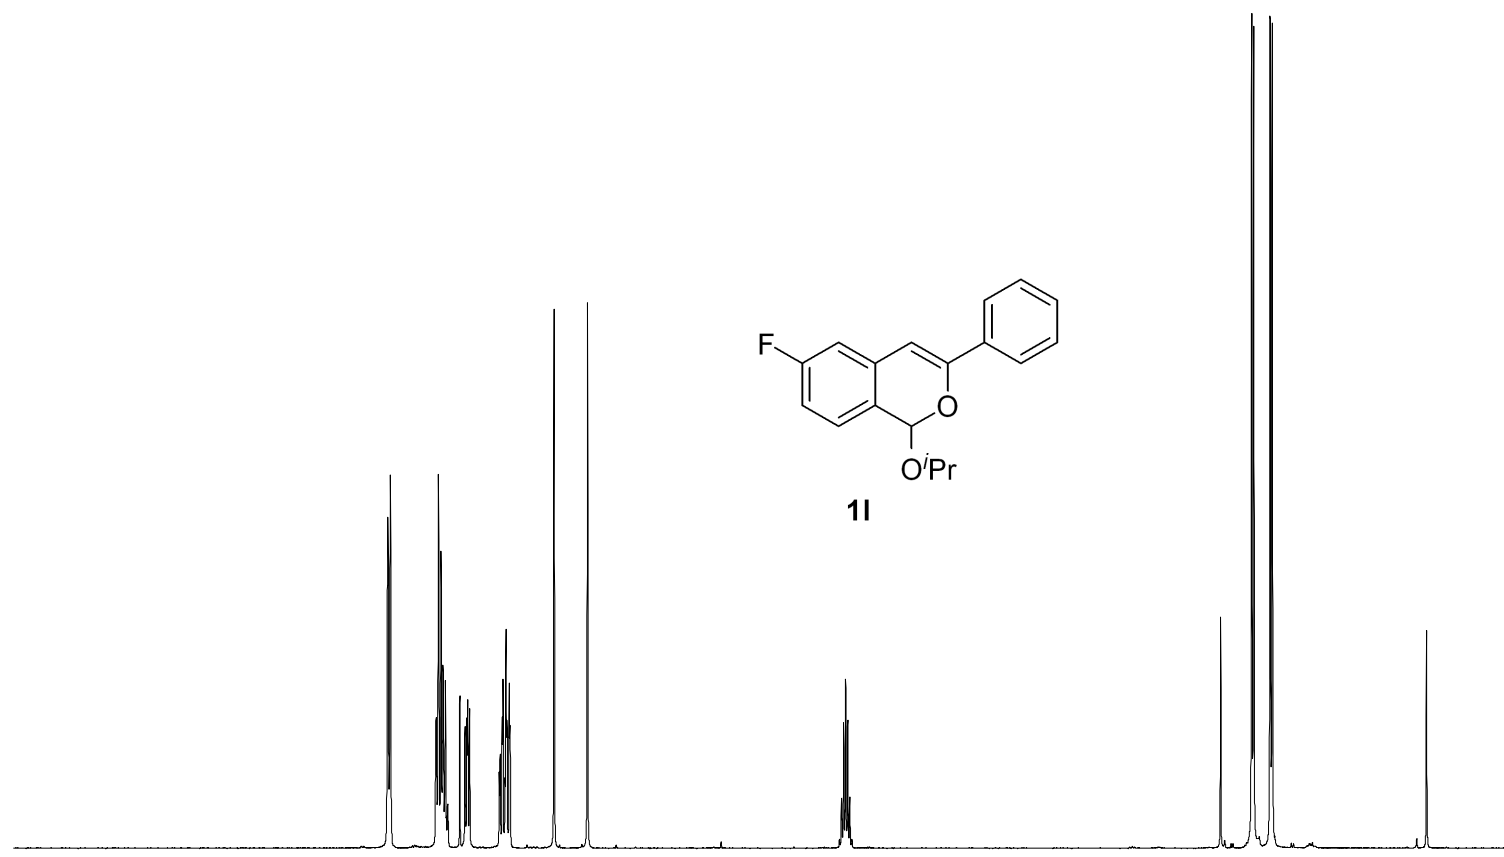

10 9 8 7 6 5 4 3 2 1 ppm

1.99  
3.03  
1.00  
1.99  
1.00  
0.99

1.01

3.08  
3.04

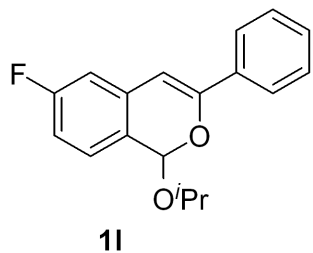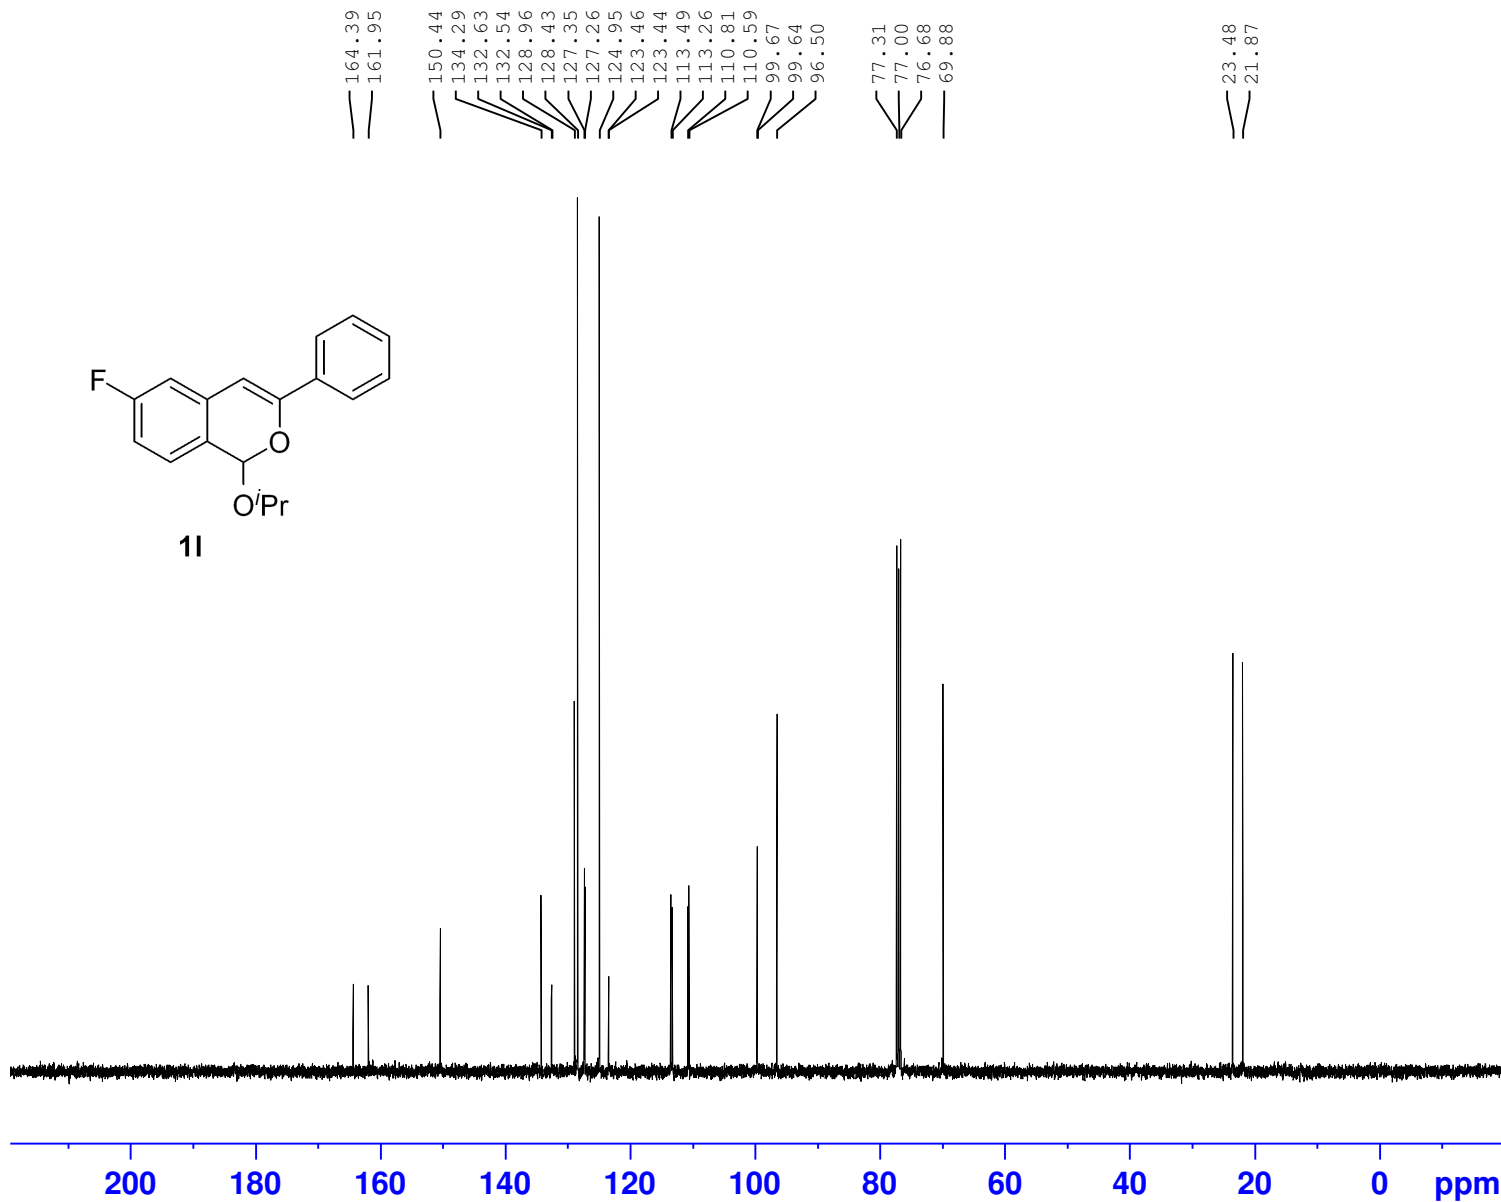

Current Data Parameters  
 NAME lsx-project3-1h-c-fr  
 EXPNO 1  
 PROCNO 1

F2 - Acquisition Parameters  
 Date\_ 20220723  
 Time 16.36  
 INSTRUM spect  
 PROBHD 5 mm PABBO BB/  
 PULPROG zgpg30  
 TD 65536  
 SOLVENT CDCl3  
 NS 72  
 DS 2  
 SWH 24038.461 Hz  
 FIDRES 0.366798 Hz  
 AQ 1.3631488 sec  
 RG 196.92  
 DW 20.800 usec  
 DE 6.50 usec  
 TE 296.3 K  
 D1 2.00000000 sec  
 D11 0.03000000 sec  
 TD0 1

==== CHANNEL f1 =====  
 SFO1 100.6228298 MHz  
 NUC1 13C  
 P1 9.70 usec  
 PLW1 46.98899841 W

==== CHANNEL f2 =====  
 SFO2 400.1316005 MHz  
 NUC2 1H  
 CPDPRG[2] waltz16  
 PCPD2 90.00 usec  
 PLW2 11.99499989 W  
 PLW12 0.34213999 W  
 PLW13 0.27713001 W

F2 - Processing parameters  
 SI 32768  
 SF 100.6127787 MHz  
 WDW EM  
 SSB 0  
 LB 1.00 Hz  
 GB 0  
 PC 1.40

— -112.92

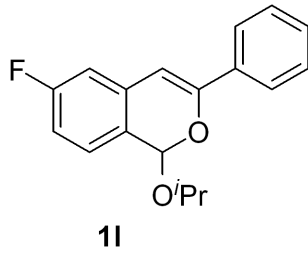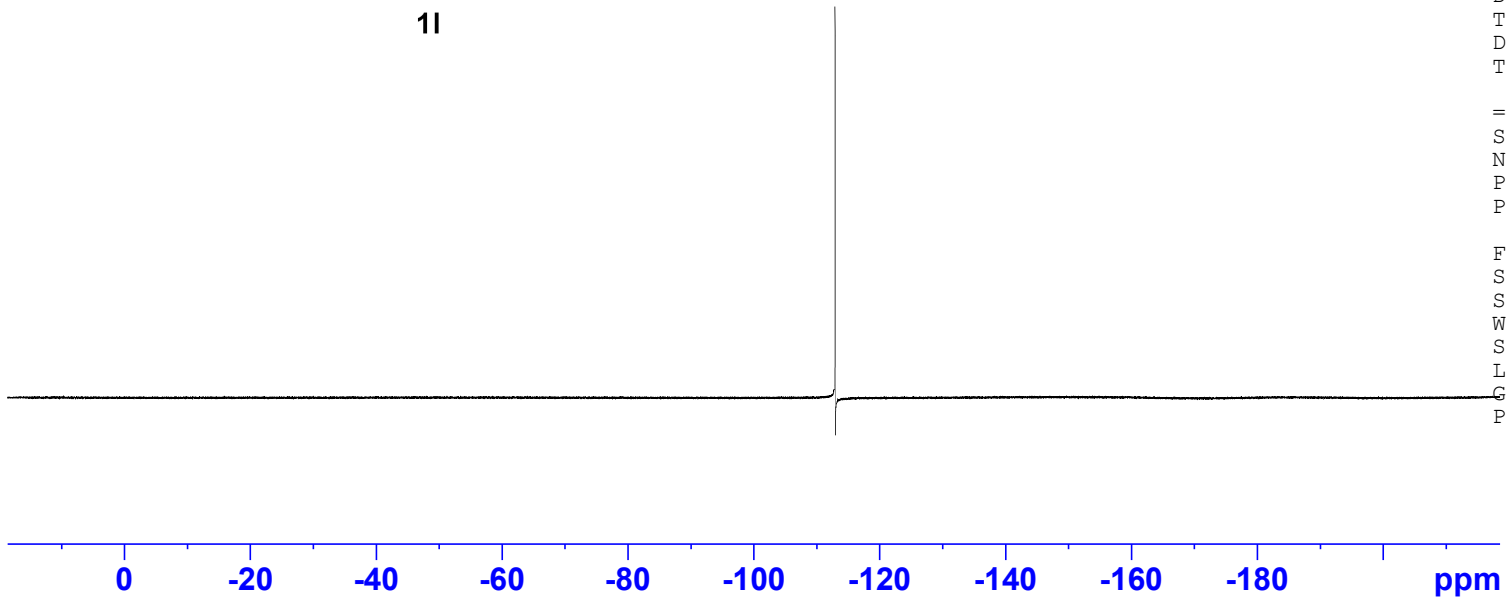

Current Data Parameters  
NAME lsx-1-7f-f  
EXPNO 1  
PROCNO 1

F2 - Acquisition Parameters  
Date\_ 20211228  
Time\_ 19.39  
INSTRUM spect  
PROBHD 5 mm PABBO BB/  
PULPROG zgflqn  
TD 131072  
SOLVENT CDCl3  
NS 8  
DS 4  
SWH 89285.711 Hz  
FIDRES 0.681196 Hz  
AQ 0.7340032 sec  
RG 196.92  
DW 5.600 usec  
DE 6.50 usec  
TE 294.9 K  
D1 1.00000000 sec  
TD0 1

==== CHANNEL f1 =====  
SFO1 376.4607164 MHz  
NUC1 19F  
P1 14.70 usec  
PLW1 15.99600029 W

F2 - Processing parameters  
SI 65536  
SF 376.4983660 MHz  
WDW EM  
SSB 0  
LB 0.30 Hz  
GB 0  
PC 1.00

7.786  
7.782  
7.777  
7.764  
7.393  
7.389  
7.375  
7.372  
7.356  
7.325  
7.322  
7.312  
7.307  
7.301  
7.291  
7.289  
7.173  
7.113  
7.094  
7.048  
7.029  
6.997  
6.538  
6.260

4.362  
4.346  
4.330  
4.315  
4.299

2.325

1.283  
1.268  
1.152  
1.136

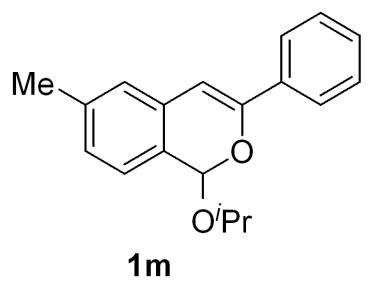

Current Data Parameters  
NAME lsx-project3-li-h  
EXPNO 1  
PROCNO 1

F2 - Acquisition Parameters  
Date\_ 20220722  
Time 20.23  
INSTRUM spect  
PROBHD 5 mm DUL 13C-1  
PULPROG zg30  
TD 65536  
SOLVENT CDC13  
NS 7  
DS 2  
SWH 8223.685 Hz  
FIDRES 0.125483 Hz  
AQ 3.9845889 sec  
RG 64  
DW 60.800 usec  
DE 6.00 usec  
TE 292.8 K  
D1 1.00000000 sec  
TD0 1

===== CHANNEL f1 =====  
NUC1 1H  
P1 15.80 usec  
PL1 -1.00 dB  
PL1W 12.17476940 W  
SFO1 400.1324710 MHz

F2 - Processing parameters  
SI 32768  
SF 400.1300443 MHz  
WDW EM  
SSB 0  
LB 0.30 Hz  
GB 0  
PC 1.00

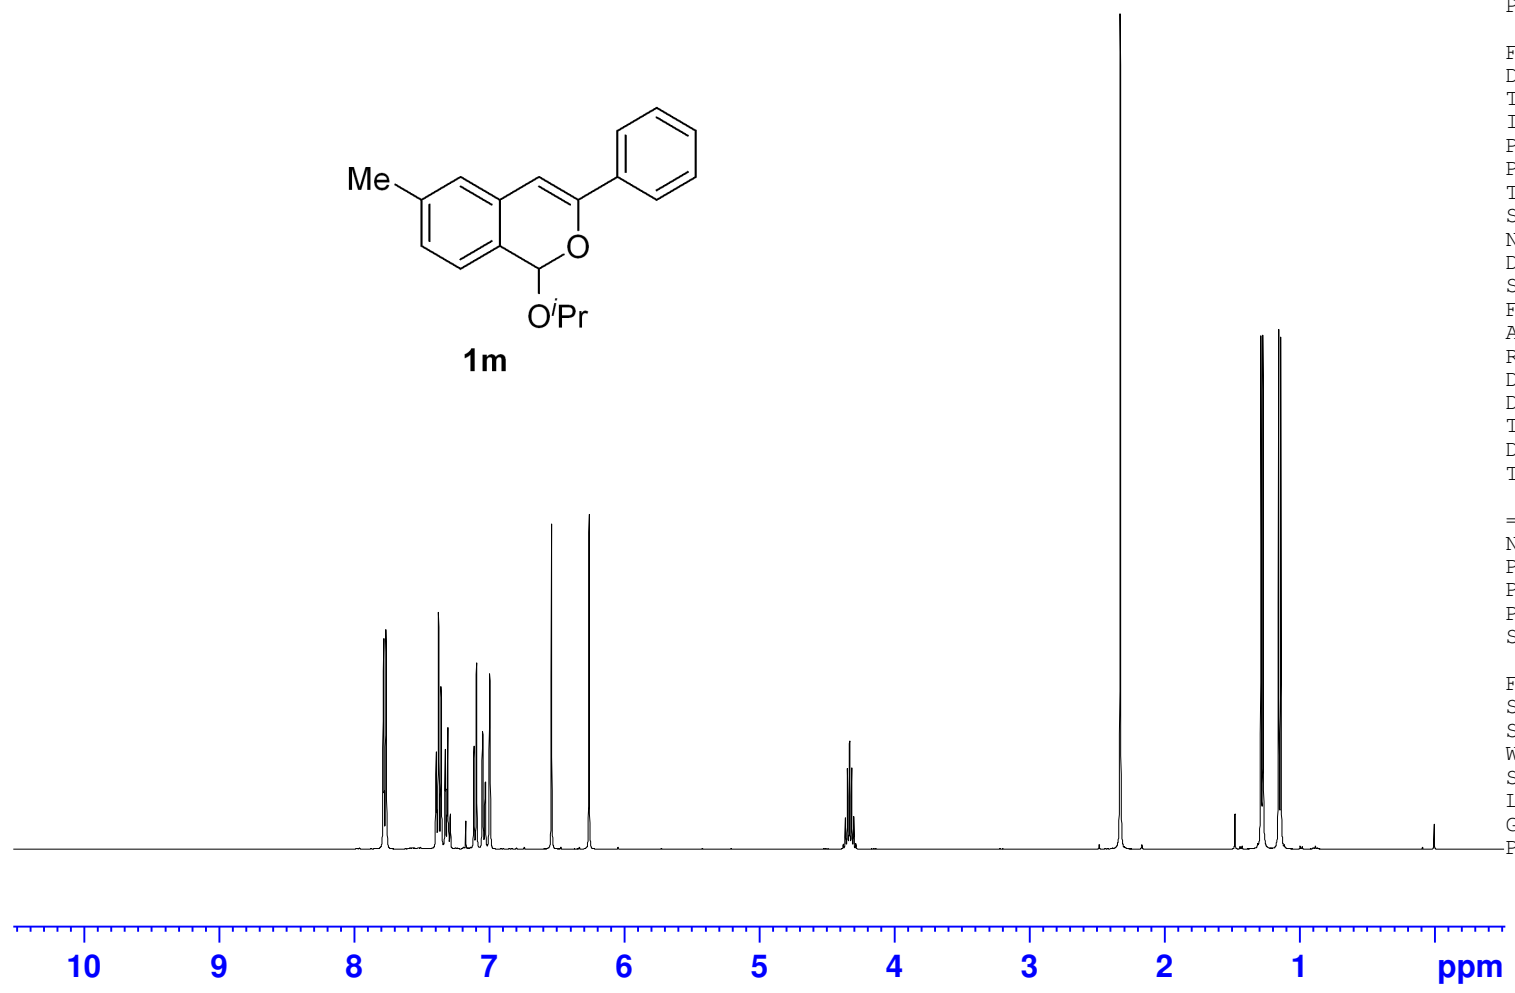

2.01  
3.06  
2.99  
1.00  
0.99  
1.00  
3.01  
3.08  
3.03

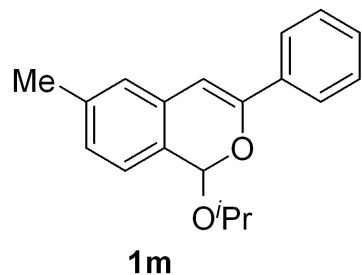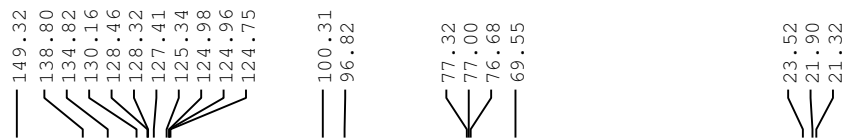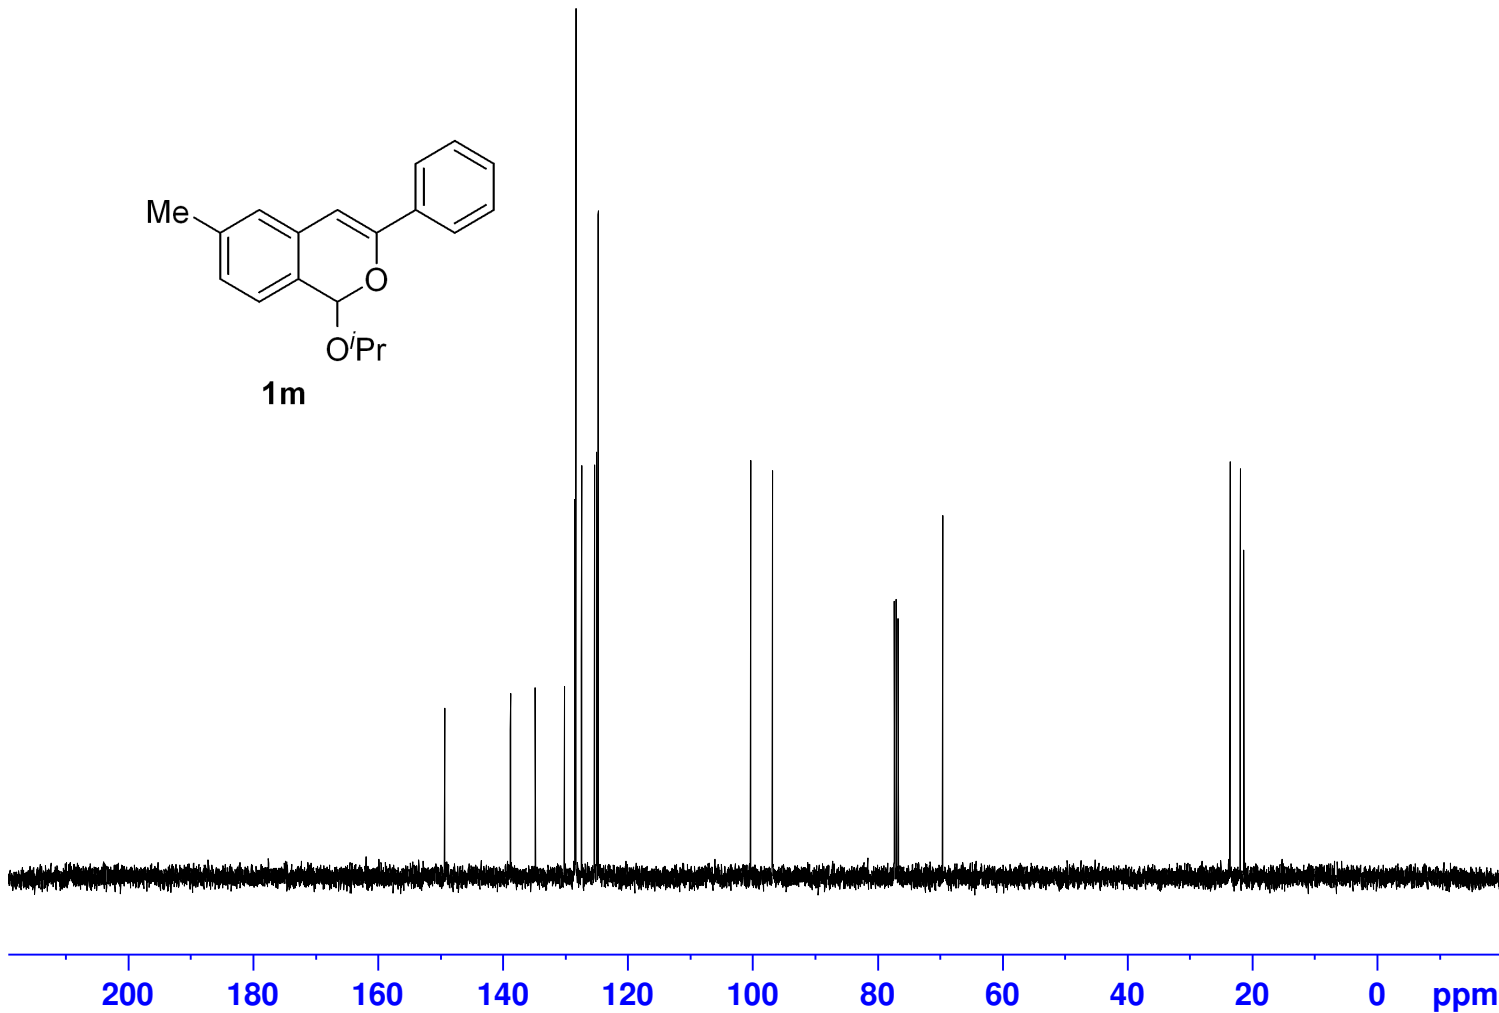

Current Data Parameters  
 NAME lsx-project3-li-c  
 EXPNO 1  
 PROCNO 1

F2 - Acquisition Parameters  
 Date\_ 20220722  
 Time 20.26  
 INSTRUM spect  
 PROBHD 5 mm DUL 13C-1  
 PULPROG zgpg30  
 TD 65536  
 SOLVENT CDCl3  
 NS 33  
 DS 1  
 SWH 24038.461 Hz  
 FIDRES 0.366798 Hz  
 AQ 1.3631488 sec  
 RG 2050  
 DW 20.800 usec  
 DE 6.00 usec  
 TE 293.1 K  
 D1 2.00000000 sec  
 D11 0.03000000 sec  
 TD0 1

===== CHANNEL f1 =====  
 NUC1 13C  
 P1 40.00 usec  
 PL1 -3.00 dB  
 PL1W 60.64365387 W  
 SFO1 100.6228298 MHz

===== CHANNEL f2 =====  
 CPDPRG[2] waltz16  
 NUC2 1H  
 PCPD2 80.00 usec  
 PL2 -1.00 dB  
 PL12 14.39 dB  
 PL13 18.00 dB  
 PL2W 12.17476940 W  
 PL12W 0.35193357 W  
 PL13W 0.15327126 W  
 SFO2 400.1316005 MHz

F2 - Processing parameters  
 SI 32768  
 SF 100.6127854 MHz  
 WDW EM  
 SSB 0  
 LB 1.00 Hz  
 GB 0  
 PC 1.40

7.888  
7.809  
7.790  
7.788  
7.718  
7.697  
7.551  
7.548  
7.534  
7.531  
7.527  
7.514  
7.510  
7.495  
7.492  
7.475  
7.472  
7.458  
7.455  
7.444  
7.440  
7.426  
7.423  
7.407  
7.370  
7.367  
7.364  
7.354  
7.349  
7.343  
7.334  
7.331  
7.328  
7.305  
7.298  
7.277  
7.173  
6.422  
4.425  
4.410  
4.394  
4.379  
4.363

1.314  
1.299  
1.185  
1.169

Current Data Parameters  
 NAME lsx-project3-1j-h  
 EXPNO 1  
 PROCNO 1

F2 - Acquisition Parameters  
 Date\_ 20220722  
 Time 20.29  
 INSTRUM spect  
 PROBHD 5 mm DUL 13C-1  
 PULPROG zg30  
 TD 65536  
 SOLVENT CDCl3  
 NS 8  
 DS 2  
 SWH 8223.685 Hz  
 FIDRES 0.125483 Hz  
 AQ 3.9845889 sec  
 RG 101  
 DW 60.800 usec  
 DE 6.00 usec  
 TE 292.8 K  
 D1 1.00000000 sec  
 TD0 1

==== CHANNEL f1 =====  
 NUC1 1H  
 P1 15.80 usec  
 PL1 -1.00 dB  
 PL1W 12.17476940 W  
 SFO1 400.1324710 MHz

F2 - Processing parameters  
 SI 32768  
 SF 400.1300444 MHz  
 WDW EM  
 SSB 0  
 LB 0.30 Hz  
 GB 0  
 PC 1.00

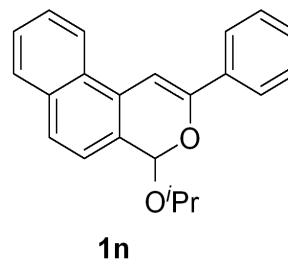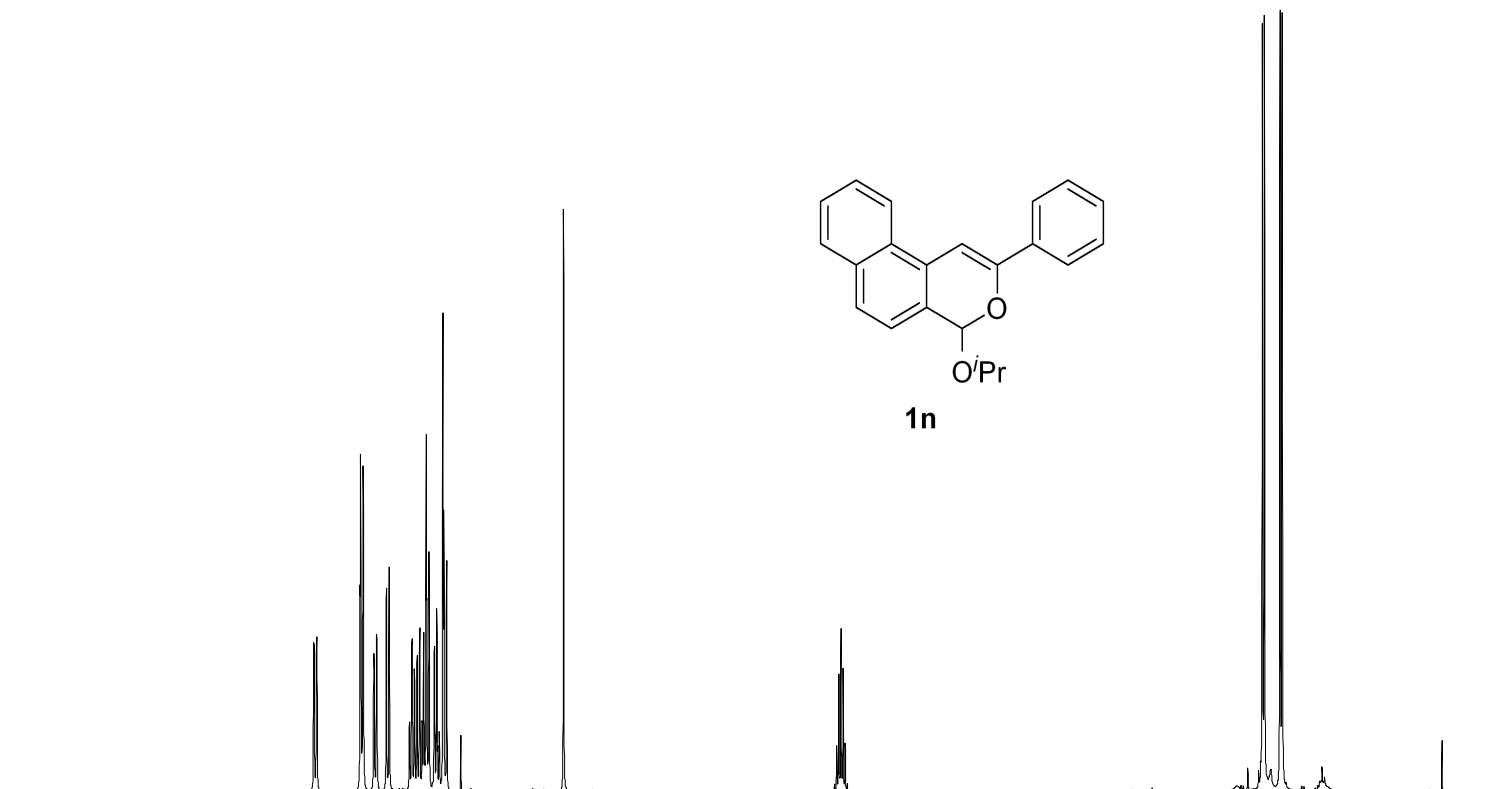

10 9 8 7 6 5 4 3 2 1 ppm

1.01  
2.04  
1.02  
1.02  
7.20

1.00

1.00

3.09  
3.05

150.28  
134.94  
133.89  
128.72  
128.51  
128.44  
128.02  
126.80  
126.49  
126.16  
126.11  
125.00  
123.61  
123.44  
122.90

97.41  
95.98

77.32  
77.00  
76.68  
69.85

23.60  
22.01

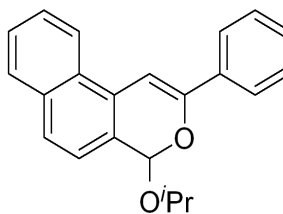

1n

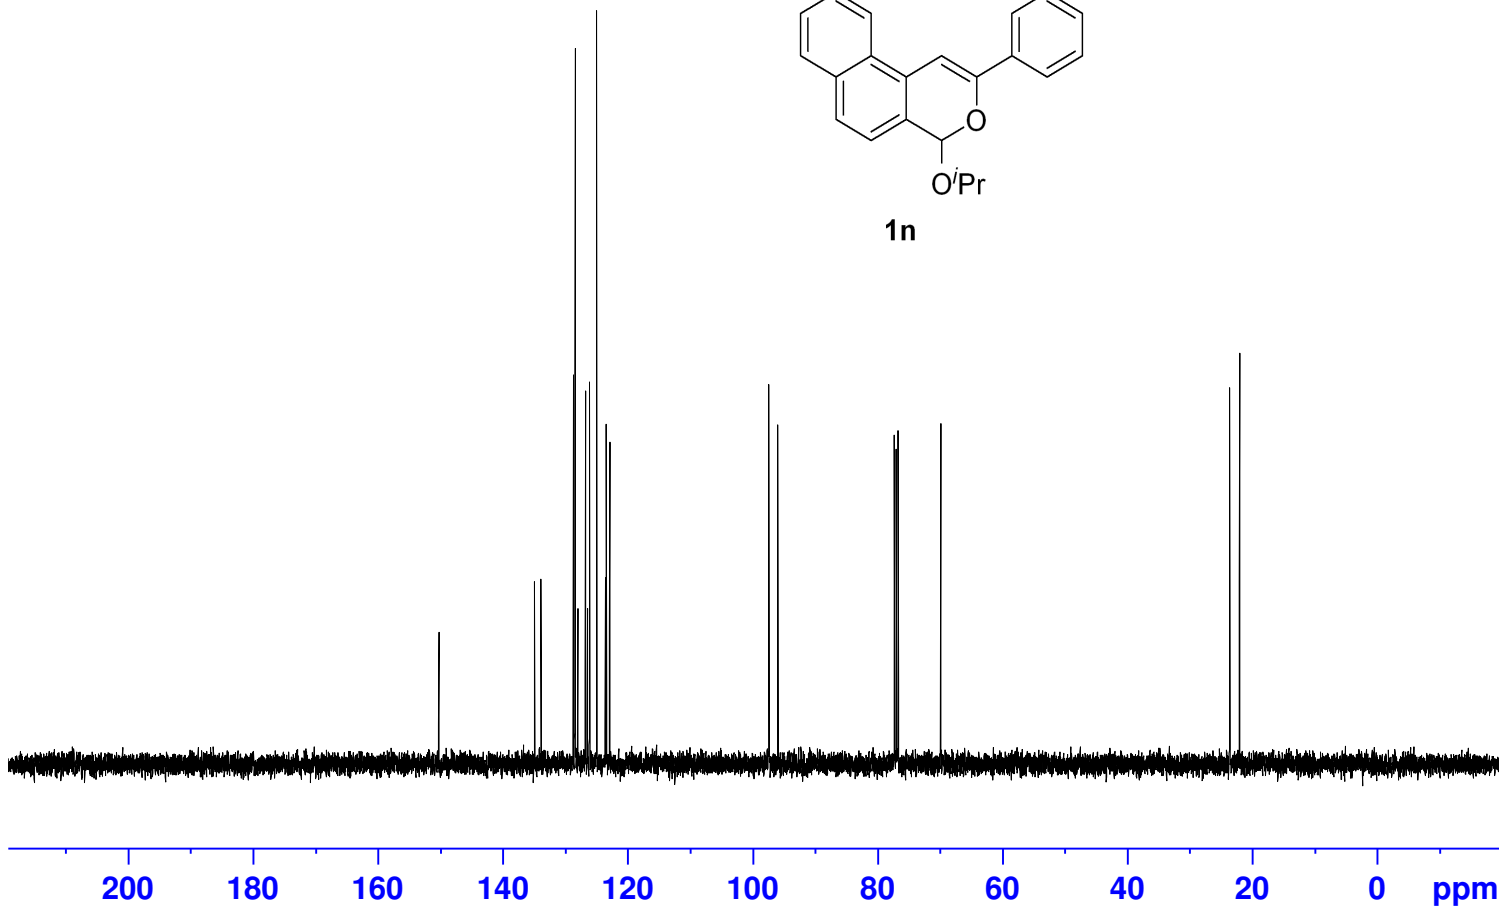

Current Data Parameters  
NAME lsx-project3-1j-c  
EXPNO 1  
PROCNO 1

F2 - Acquisition Parameters  
Date\_ 20220722  
Time 20.32  
INSTRUM spect  
PROBHD 5 mm DUL 13C-1  
PULPROG zgpg30  
TD 65536  
SOLVENT CDCl3  
NS 47  
DS 1  
SWH 24038.461 Hz  
FIDRES 0.366798 Hz  
AQ 1.3631488 sec  
RG 2050  
DW 20.800 usec  
DE 6.00 usec  
TE 293.1 K  
D1 2.00000000 sec  
D11 0.03000000 sec  
TD0 1

==== CHANNEL f1 =====  
NUC1 13C  
P1 40.00 usec  
PL1 -3.00 dB  
PL1W 60.64365387 W  
SFO1 100.6228298 MHz

==== CHANNEL f2 =====  
CPDPRG[2] waltz16  
NUC2 1H  
PCPD2 80.00 usec  
PL2 -1.00 dB  
PL12 14.39 dB  
PL13 18.00 dB  
PL2W 12.17476940 W  
PL12W 0.35193357 W  
PL13W 0.15327126 W  
SFO2 400.1316005 MHz

F2 - Processing parameters  
SI 32768  
SF 100.6127847 MHz  
WDW EM  
SSB 0  
LB 1.00 Hz  
GB 0  
PC 1.40



7.774  
7.755  
7.406  
7.387  
7.368  
7.329  
7.311  
7.292  
7.255  
7.159  
7.138  
6.915  
6.909  
6.894  
6.888  
6.780  
6.774  
6.569  
6.249

4.393  
4.377  
4.362  
4.346  
4.331  
3.834

1.321  
1.305  
1.175  
1.160

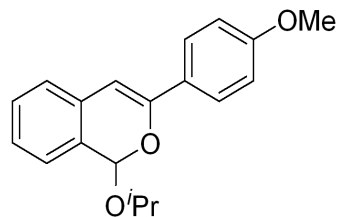

1o

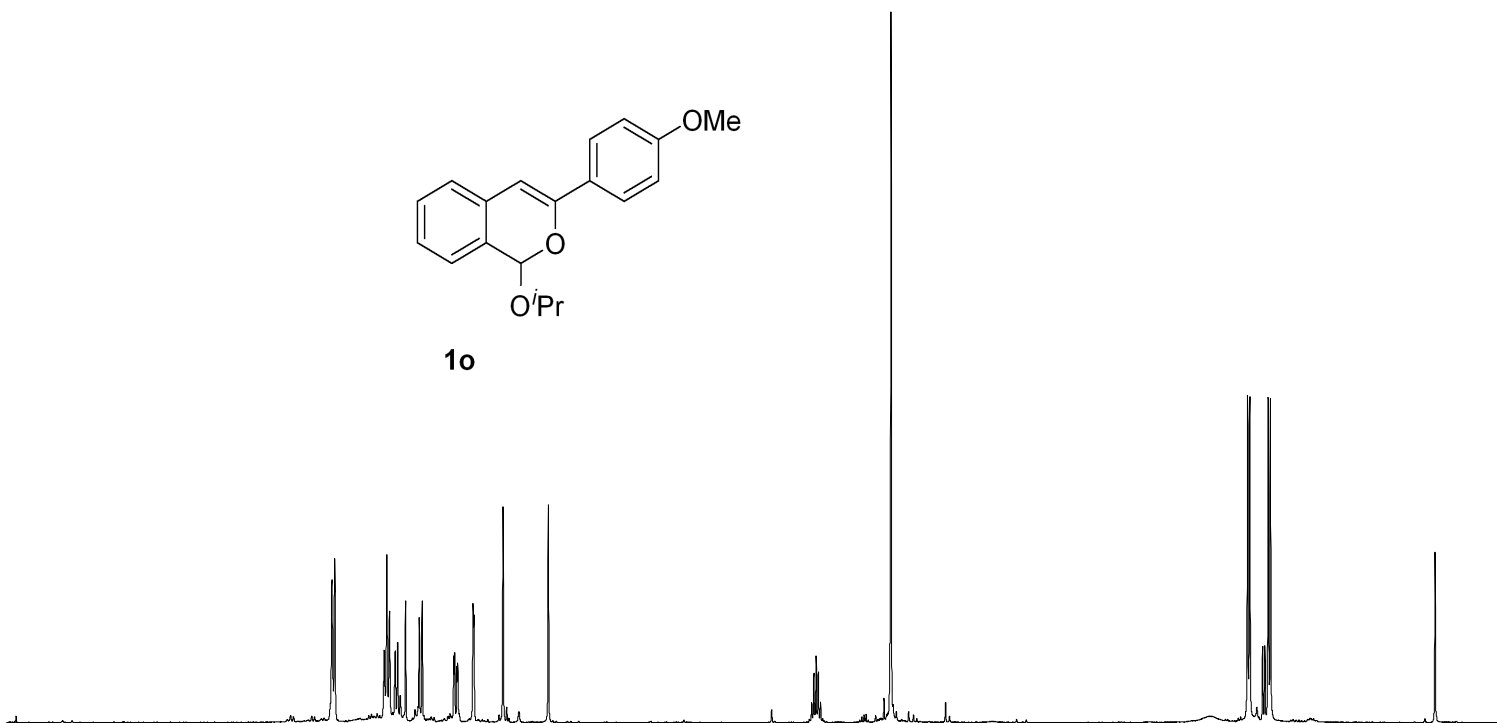

2.14  
2.34  
0.96  
1.09  
1.09  
1.05  
1.01  
1.00

1.00  
3.17

3.15  
3.05

Current Data Parameters  
NAME lsx-1-6ome-c  
EXPNO 1  
PROCNO 1

F2 - Acquisition Parameters  
Date\_ 20211228  
Time 19.50  
INSTRUM spect  
PROBHD 5 mm PABBO BB/  
PULPROG zg30  
TD 65536  
SOLVENT CDC13  
NS 9  
DS 2  
SWH 8012.820 Hz  
FIDRES 0.122266 Hz  
AQ 4.0894465 sec  
RG 126.97  
DW 62.400 usec  
DE 6.50 usec  
TE 295.4 K  
D1 1.00000000 sec  
TD0 1

===== CHANNEL f1 =====  
SFO1 400.1324710 MHz  
NUC1 1H  
P1 14.50 usec  
PLW1 11.99499989 W

F2 - Processing parameters  
SI 65536  
SF 400.1300119 MHz  
WDW EM  
SSB 0  
LB 0.30 Hz  
GB 0  
PC 1.00

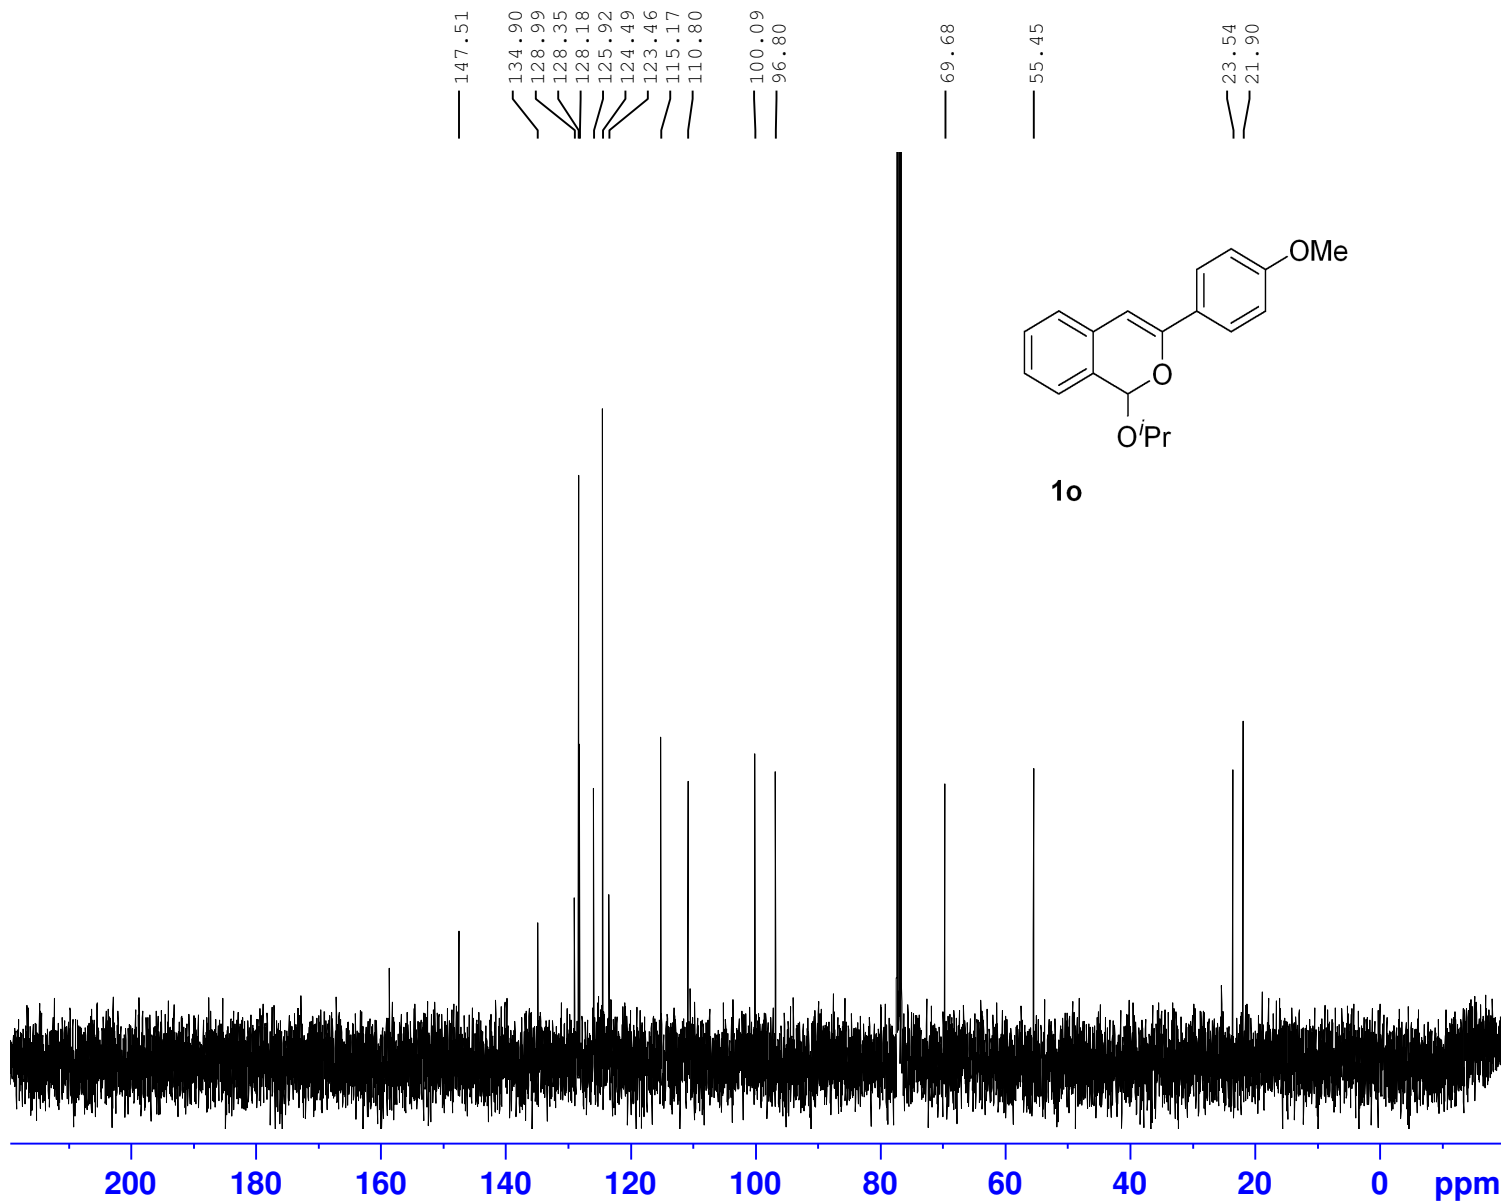

Current Data Parameters  
 NAME lsx-1-6ome-h  
 EXPNO 1  
 PROCNO 1

F2 - Acquisition Parameters  
 Date\_ 20211228  
 Time 19.48  
 INSTRUM spect  
 PROBHD 5 mm PABBO BB/  
 PULPROG zgpg30  
 TD 65536  
 SOLVENT CDC13  
 NS 59  
 DS 2  
 SWH 24038.461 Hz  
 FIDRES 0.366798 Hz  
 AQ 1.3631488 sec  
 RG 196.92  
 DW 20.800 usec  
 DE 6.50 usec  
 TE 296.0 K  
 D1 2.00000000 sec  
 D11 0.03000000 sec  
 TD0 1

==== CHANNEL f1 =====  
 SFO1 100.6228298 MHz  
 NUC1 13C  
 P1 9.70 usec  
 PLW1 46.98899841 W

==== CHANNEL f2 =====  
 SFO2 400.1316005 MHz  
 NUC2 1H  
 CPDPRG[2] waltz16  
 PCPD2 90.00 usec  
 PLW2 11.99499989 W  
 PLW12 0.34213999 W  
 PLW13 0.27713001 W

F2 - Processing parameters  
 SI 32768  
 SF 100.6127725 MHz  
 WDW EM  
 SSB 0  
 LB 1.00 Hz  
 GB 0  
 PC 1.40

7.270  
7.266  
7.251  
7.247  
7.242  
7.233  
7.229  
7.181  
7.178  
7.162  
7.160  
7.144  
7.142  
7.130  
7.127  
7.111  
7.042  
7.023  
6.101  
5.744

4.291  
4.275  
4.260  
4.244  
4.229  
4.229  
2.189  
2.182  
2.169  
2.162  
2.154  
2.134  
1.967  
1.962  
1.958  
1.953  
1.944  
1.940  
1.935  
1.824  
1.809  
1.796  
1.725  
1.721  
1.718  
1.714  
1.710  
1.691  
1.404  
1.396  
1.387  
1.363  
1.352  
1.343  
1.334  
1.312

Current Data Parameters  
 NAME lsx-project3-11-h-fr  
 EXPNO 1  
 PROCNO 1

F2 - Acquisition Parameters  
 Date\_ 20220723  
 Time 13.55  
 INSTRUM spect  
 PROBHD 5 mm PABBO BB/  
 PULPROG zg30  
 TD 65536  
 SOLVENT CDC13  
 NS 5  
 DS 2  
 SWH 8012.820 Hz  
 FIDRES 0.122266 Hz  
 AQ 4.0894465 sec  
 RG 31.55  
 DW 62.400 usec  
 DE 6.50 usec  
 TE 295.3 K  
 D1 1.00000000 sec  
 TD0 1

==== CHANNEL f1 =====  
 SFO1 400.1324710 MHz  
 NUC1 1H  
 P1 14.50 usec  
 PLW1 11.99499989 W

F2 - Processing parameters  
 SI 65536  
 SF 400.1300174 MHz  
 WDW EM  
 SSB 0  
 LB 0.30 Hz  
 GB 0  
 PC 1.00

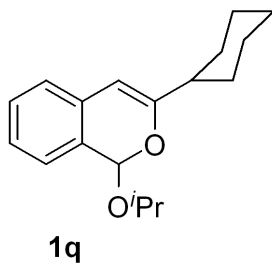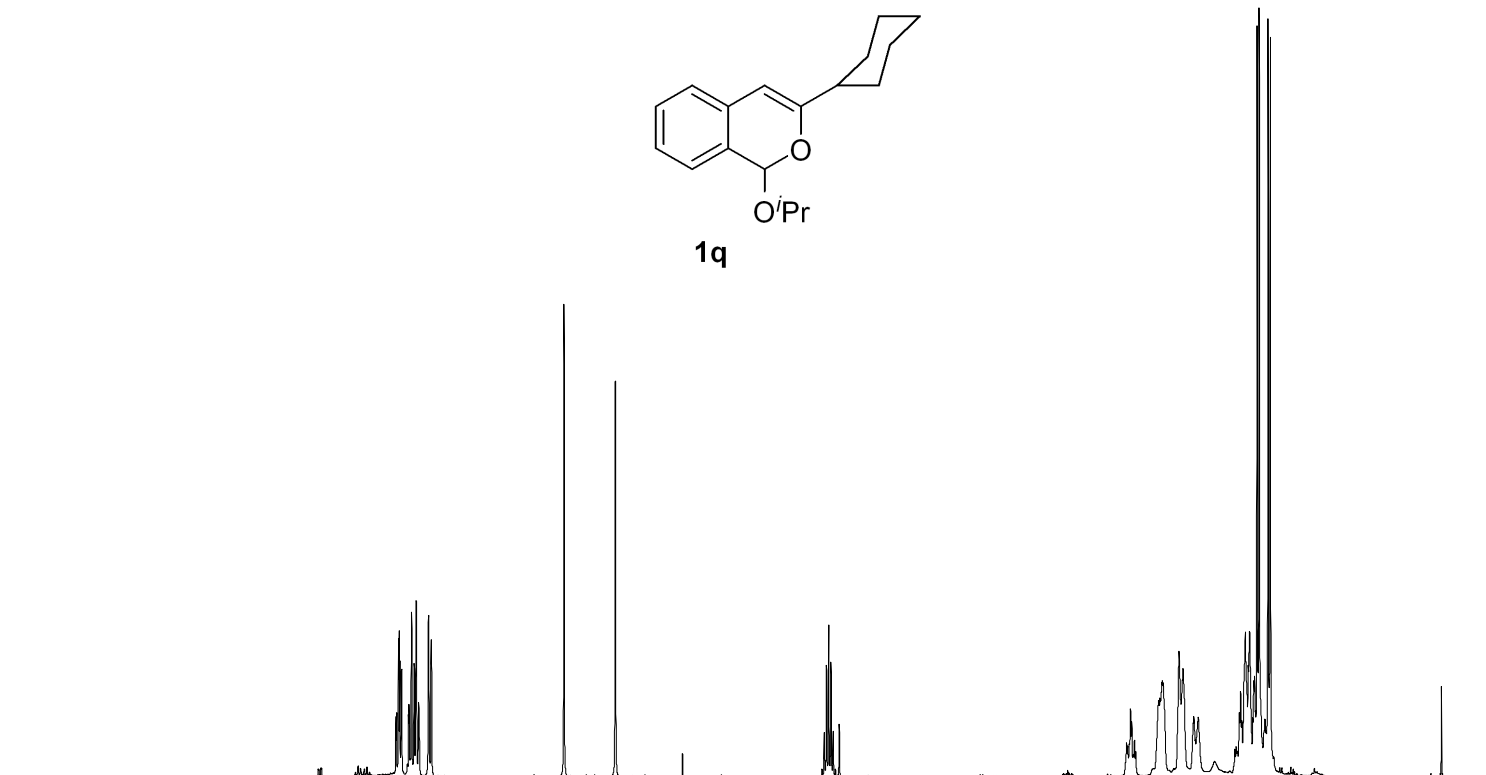

1.18  
2.11  
1.00

1.00  
1.00

1.03

1.01  
2.06  
2.27  
1.22  
8.38  
3.39

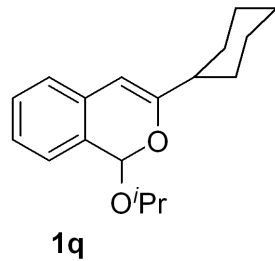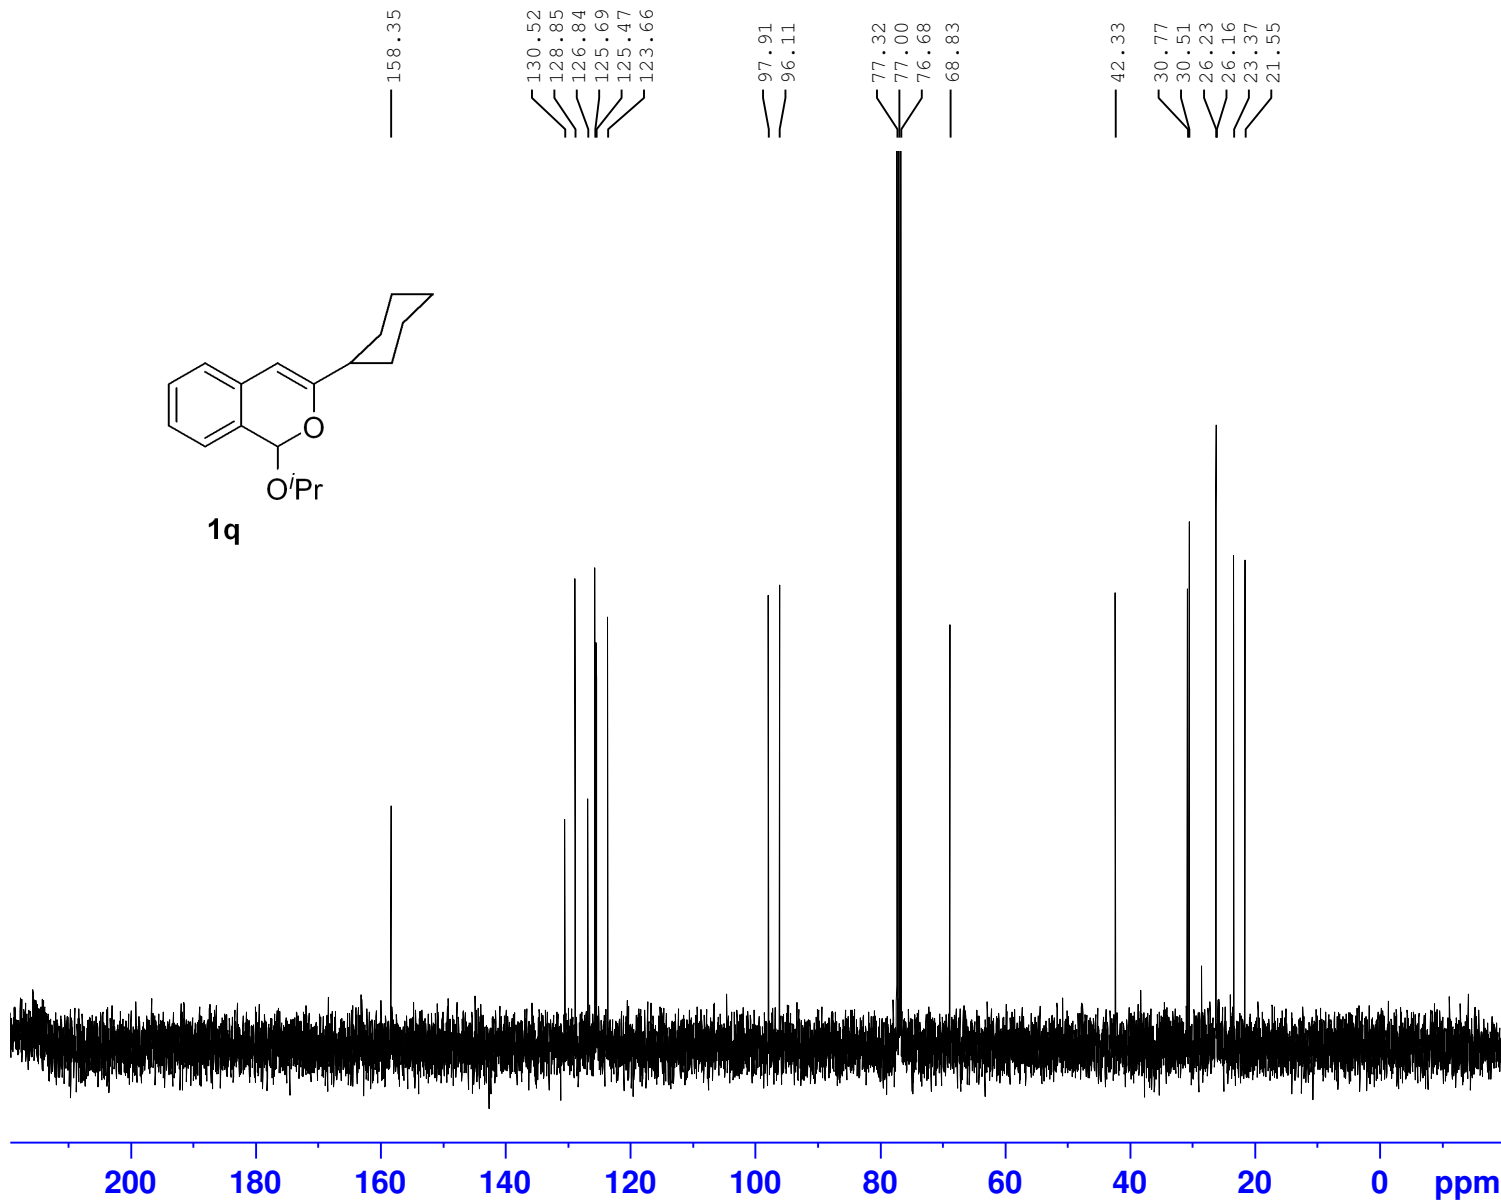

Current Data Parameters  
 NAME lsx-project3-11-c-fr  
 EXPNO 1  
 PROCNO 1

F2 - Acquisition Parameters  
 Date\_ 20220723  
 Time 13.56  
 INSTRUM spect  
 PROBHD 5 mm PABBO BB/  
 PULPROG zgpg30  
 TD 65536  
 SOLVENT CDC13  
 NS 12  
 DS 2  
 SWH 24038.461 Hz  
 FIDRES 0.366798 Hz  
 AQ 1.3631488 sec  
 RG 196.92  
 DW 20.800 usec  
 DE 6.50 usec  
 TE 295.7 K  
 D1 2.00000000 sec  
 D11 0.03000000 sec  
 TD0 1

===== CHANNEL f1 =====  
 SFO1 100.6228298 MHz  
 NUC1 13C  
 P1 9.70 usec  
 PLW1 46.98899841 W

===== CHANNEL f2 =====  
 SFO2 400.1316005 MHz  
 NUC2 1H  
 CPDPRG[2] waltz16  
 PCPD2 90.00 usec  
 PLW2 11.99499989 W  
 PLW12 0.34213999 W  
 PLW13 0.27713001 W

F2 - Processing parameters  
 SI 32768  
 SF 100.6127753 MHz  
 WDW EM  
 SSB 0  
 LB 1.00 Hz  
 GB 0  
 PC 1.40

7.693  
7.687  
7.682  
7.676  
7.667  
7.660  
7.655  
7.650  
7.644  
7.630  
7.626  
7.617  
7.607  
7.599  
7.542  
7.533  
7.528  
7.524  
7.506  
7.503  
7.284  
7.275  
7.265  
7.260  
7.257  
7.250  
7.237  
7.232  
7.171  
7.156  
7.138  
7.135  
7.118  
7.102

4.095  
4.079

1.378  
1.264

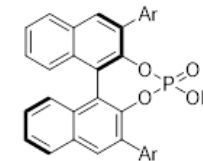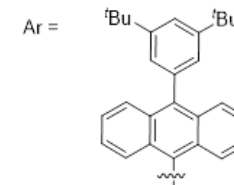

(R)-A8

Current Data Parameters  
NAME lsx-p3-cat-h-fr  
EXPNO 1  
PROCNO 1

F2 - Acquisition Parameters

Date\_ 20240515  
Time 10.05  
INSTRUM spect  
PROBHD 5 mm PABBO BB/  
PULPROG zg30  
TD 65536  
SOLVENT CDCl3  
NS 16  
DS 2  
SWH 8012.820 Hz  
FIDRES 0.122266 Hz  
AQ 4.0894465 sec  
RG 62.93  
DW 62.400 usec  
DE 6.50 usec  
TE 295.8 K  
D1 1.00000000 sec  
TD0 1

==== CHANNEL f1 =====

SFO1 400.1324710 MHz  
NUC1 1H  
P1 14.50 usec  
PLW1 11.99499989 W

F2 - Processing parameters

SI 65536  
SF 400.1300189 MHz  
WDW EM  
SSB 0  
LB 0.30 Hz  
GB 0  
PC 1.00

8.083  
8.008  
7.988  
7.805  
7.785  
7.781  
7.766  
7.745  
7.693  
7.687  
7.682  
7.676  
7.660  
7.655  
7.650  
7.644  
7.630  
7.626  
7.617  
7.607  
7.599  
7.542  
7.544  
7.533  
7.528  
7.524  
7.506  
7.503  
7.284  
7.275  
7.265  
7.260  
7.257  
7.250  
7.237  
7.232  
7.171  
7.156  
7.138  
7.135  
7.118  
7.102

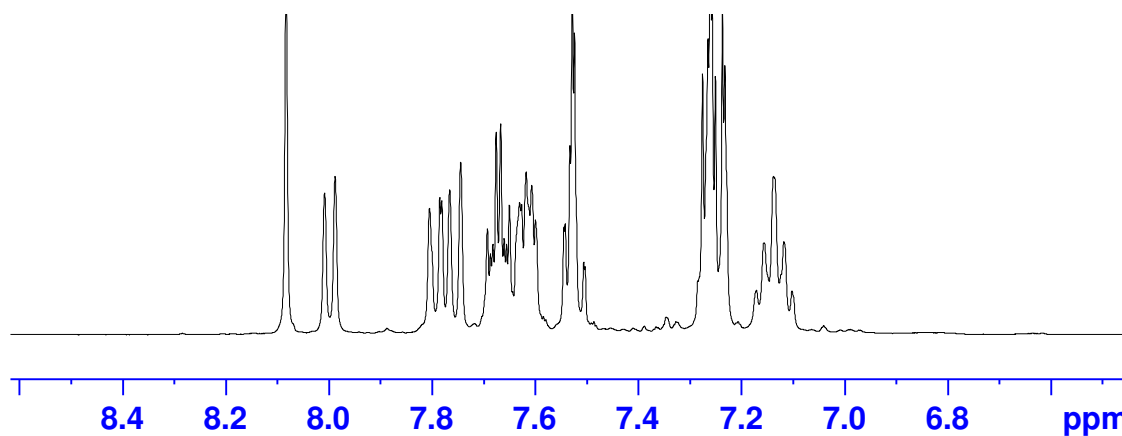

9.0 8.5 8.0 7.5 7.0 6.5 6.0 5.5 5.0 4.5 4.0 3.5 3.0 2.5 2.0 1.5 ppm

2.00  
1.99  
4.28  
8.42  
4.17  
8.07  
4.16

5.85

18.18  
18.42

150.74  
150.56  
146.79  
146.70  
139.57  
137.95  
134.33  
132.91  
131.74  
131.44  
131.41  
131.06  
130.77  
130.31  
130.13  
129.82  
128.71  
128.13  
127.63  
127.55  
127.12  
126.92  
126.43  
126.27  
125.75  
124.93  
124.65  
122.60  
121.02  
77.47  
77.16  
76.84

35.12  
35.03  
31.75  
31.65

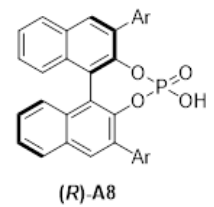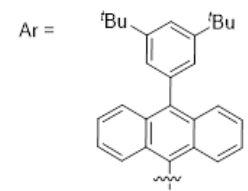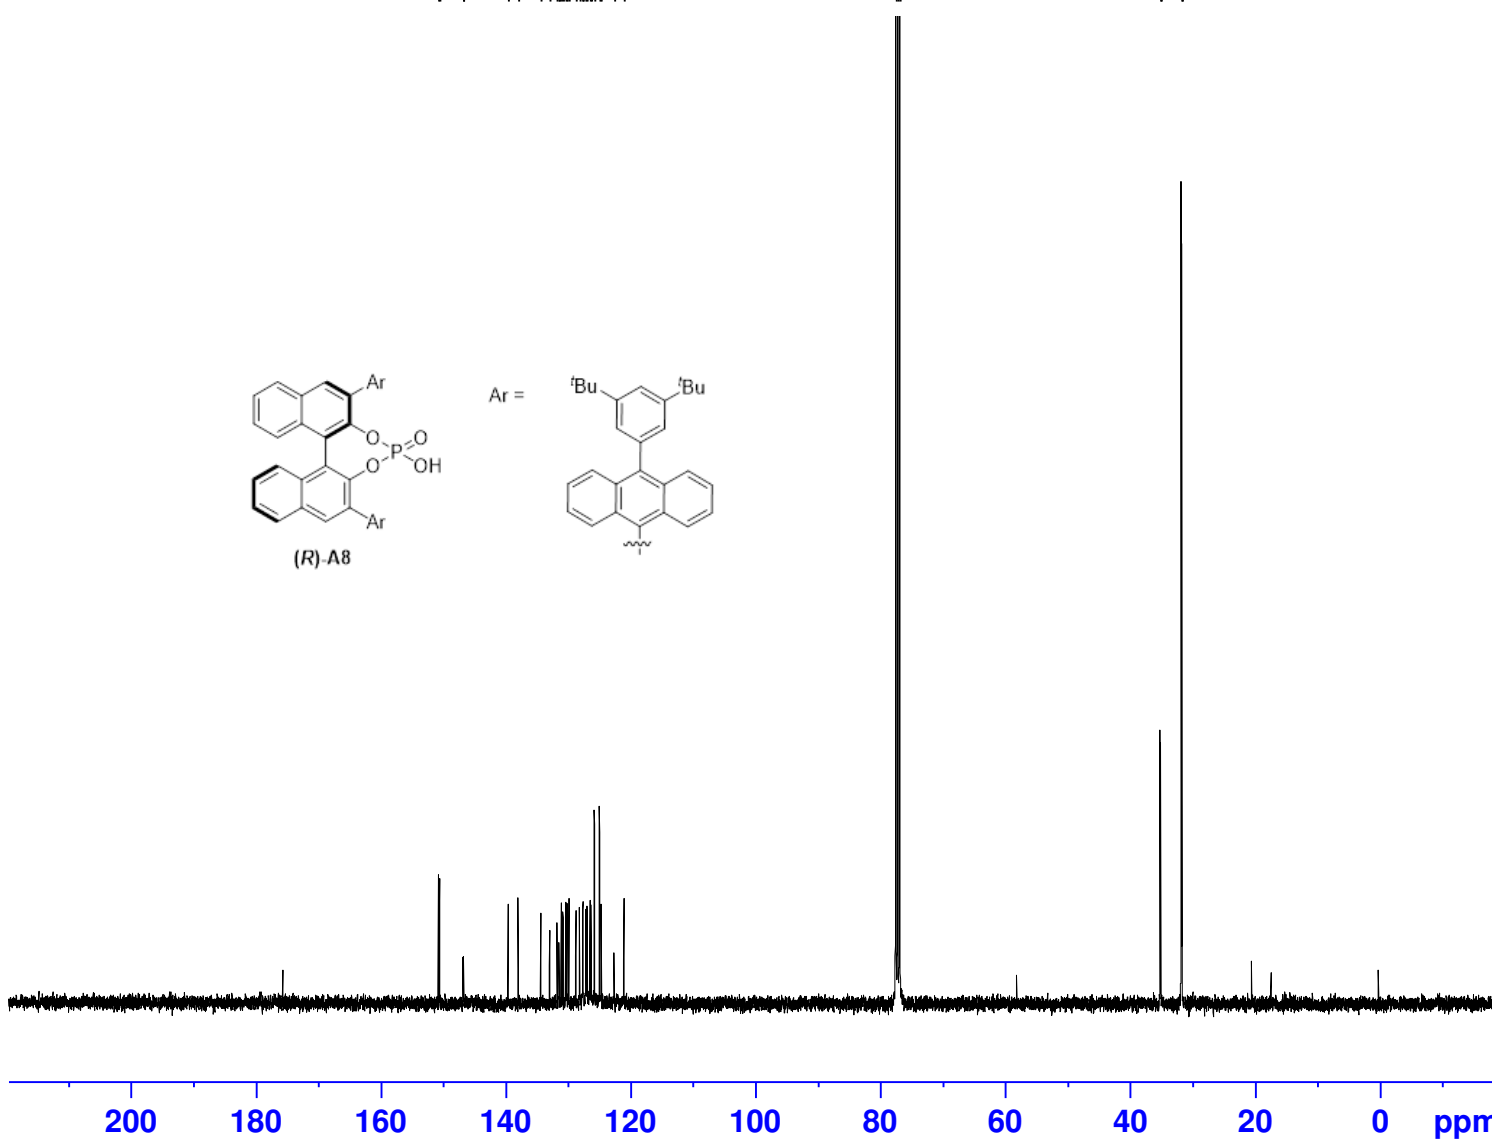

Current Data Parameters  
NAME lsx-p3-cat-c-frrrr  
EXPNO 1  
PROCNO 1

F2 - Acquisition Parameters  
Date\_ 20240515  
Time 11.09  
INSTRUM spect  
PROBHD 5 mm PABBO BB/  
PULPROG zgpg30  
TD 65536  
SOLVENT CDC13  
NS 1000  
DS 2  
SWH 24038.461 Hz  
FIDRES 0.366798 Hz  
AQ 1.3631488 sec  
RG 196.92  
DW 20.800 usec  
DE 6.50 usec  
TE 297.0 K  
D1 2.00000000 sec  
D11 0.03000000 sec  
TD0 1

===== CHANNEL f1 =====  
SFO1 100.6228298 MHz  
NUC1 13C  
P1 9.70 usec  
PLW1 46.98899841 W

===== CHANNEL f2 =====  
SFO2 400.1316005 MHz  
NUC2 1H  
CPDPRG[2] waltz16  
PCPD2 90.00 usec  
PLW2 11.99499989 W  
PLW12 0.34213999 W  
PLW13 0.27713001 W

F2 - Processing parameters  
SI 32768  
SF 100.6127574 MHz  
WDW EM  
SSB 0  
LB 1.00 Hz  
GB 0  
PC 1.40

2.24

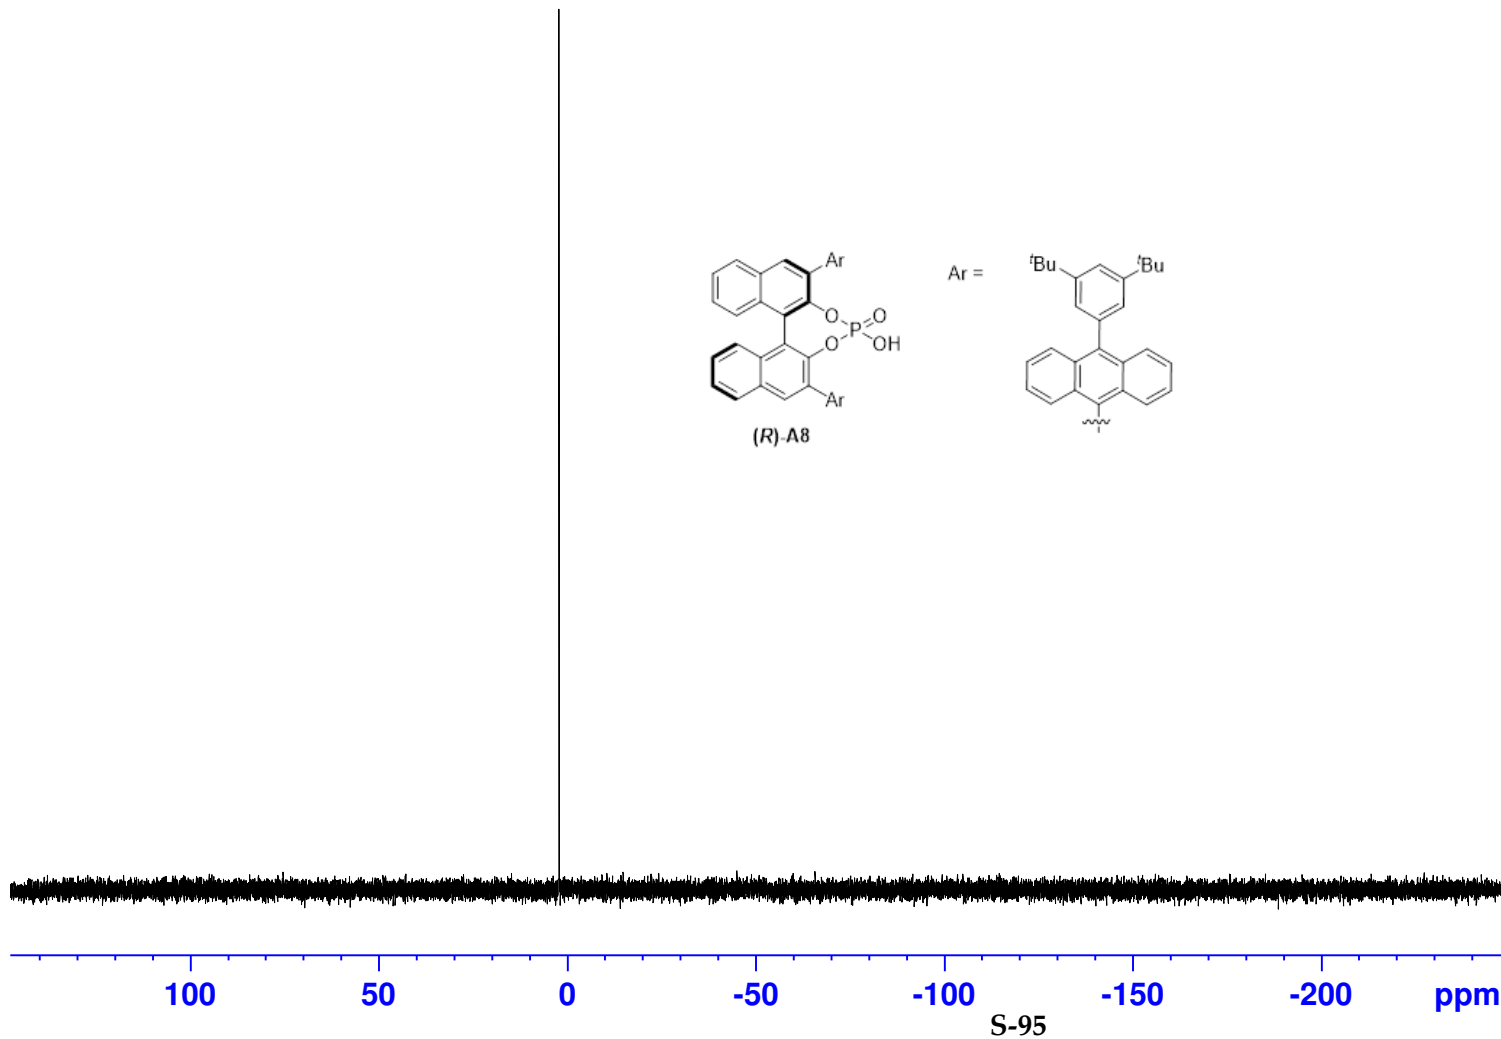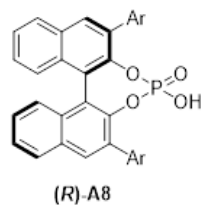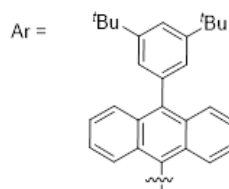

Current Data Parameters  
NAME lsx-p3-cat-p-fr  
EXPNO 1  
PROCNO 1

F2 - Acquisition Parameters  
Date\_ 20240515  
Time 10.07  
INSTRUM spect  
PROBHD 5 mm PABBO BB/  
PULPROG zgpg30  
TD 65536  
SOLVENT CDC13  
NS 17  
DS 4  
SWH 64102.562 Hz  
FIDRES 0.978127 Hz  
AQ 0.5111808 sec  
RG 196.92  
DW 7.800 usec  
DE 6.50 usec  
TE 296.2 K  
D1 2.0000000 sec  
D11 0.0300000 sec  
TD0 1

==== CHANNEL f1 =====  
SFO1 161.9674942 MHz  
NUC1 31P  
P1 14.70 usec  
PLW1 11.99499989 W

==== CHANNEL f2 =====  
SFO2 400.1316005 MHz  
NUC2 1H  
CPDPRG[2] waltz16  
PCPD2 90.00 usec  
PLW2 11.99499989 W  
PLW12 0.34213999 W  
PLW13 0.27713001 W

F2 - Processing parameters  
SI 32768  
SF 161.9755930 MHz  
WDW EM  
SSB 0  
LB 1.00 Hz  
GB 0  
PC 1.40

7.458  
7.440  
7.359  
7.350  
7.347  
7.337  
7.329  
7.318  
7.266  
7.258  
7.247  
7.236  
7.229  
7.222  
7.203  
7.191  
7.172  
7.166  
7.158

5.324  
5.309

3.215  
2.659  
2.644  
2.629  
2.614

1.747  
1.718

Current Data Parameters  
NAME lsx-p3-3a-h-fr  
EXPNO 1  
PROCNO 1

F2 - Acquisition Parameters  
Date\_ 20220726  
Time 17.19  
INSTRUM spect  
PROBHD 5 mm DUL 13C-1  
PULPROG zg30  
TD 65536  
SOLVENT CDCl3  
NS 8  
DS 2  
SWH 8223.685 Hz  
FIDRES 0.125483 Hz  
AQ 3.9845889 sec  
RG 228  
DW 60.800 usec  
DE 6.00 usec  
TE 292.8 K  
D1 1.00000000 sec  
TD0 1

==== CHANNEL f1 =====  
NUC1 1H  
P1 15.80 usec  
PL1 -1.00 dB  
PL1W 12.17476940 W  
SFO1 400.1324710 MHz

F2 - Processing parameters  
SI 32768  
SF 400.1300235 MHz  
WDW EM  
SSB 0  
LB 0.30 Hz  
GB 0  
PC 1.00

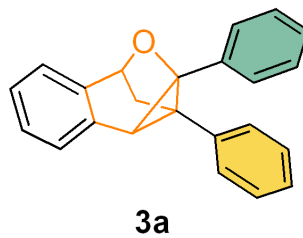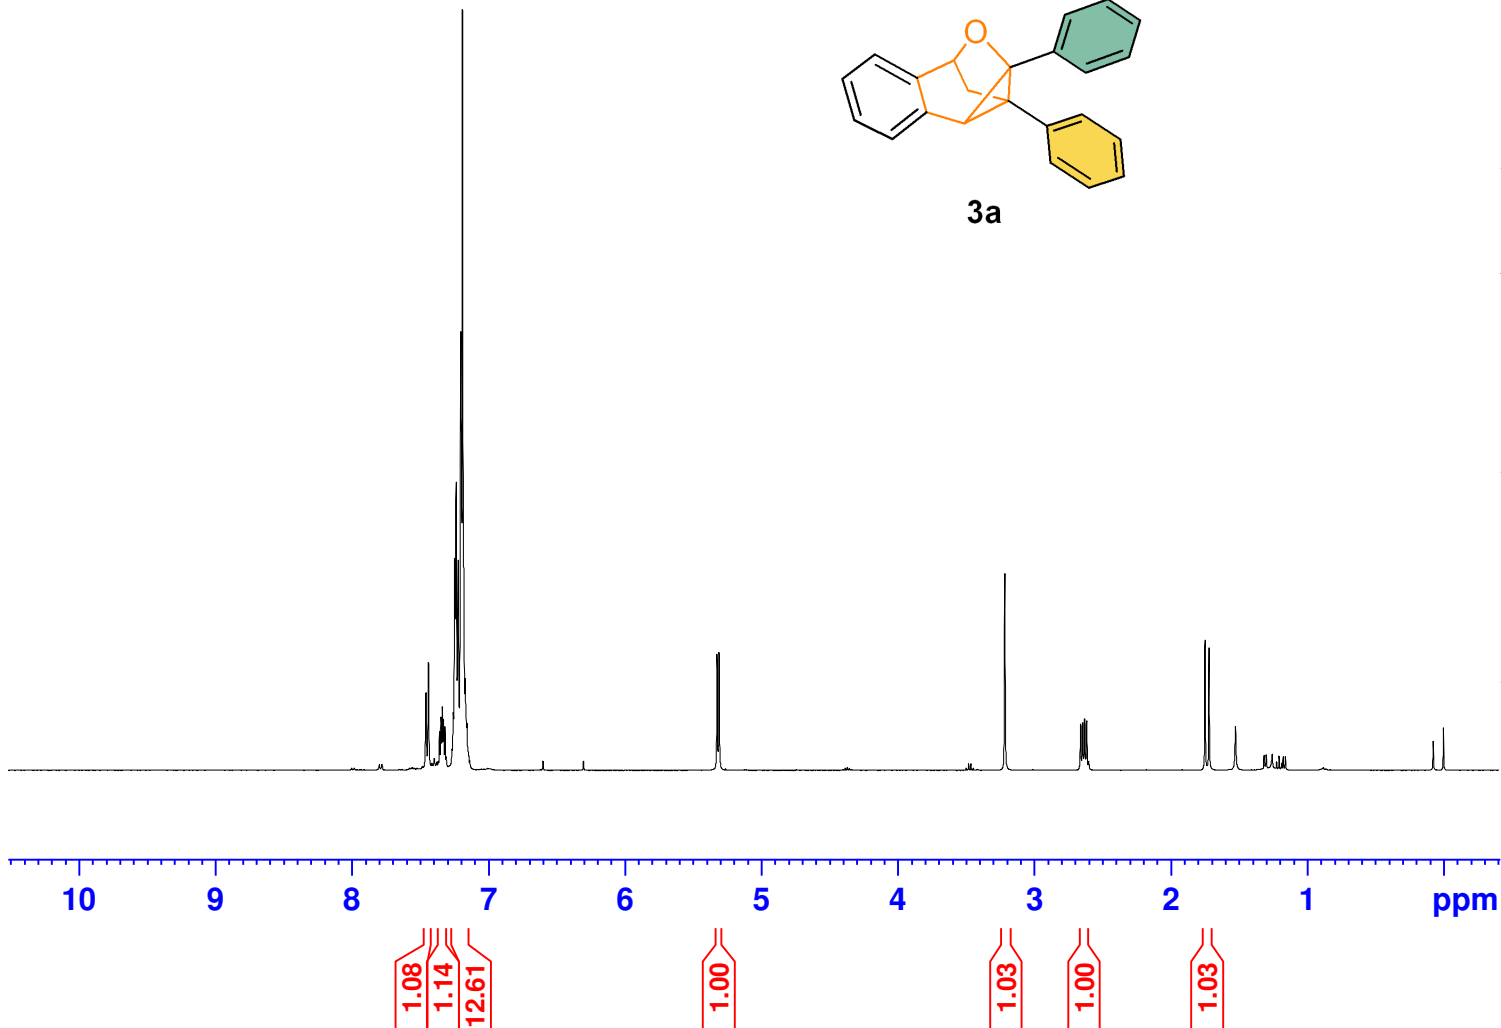



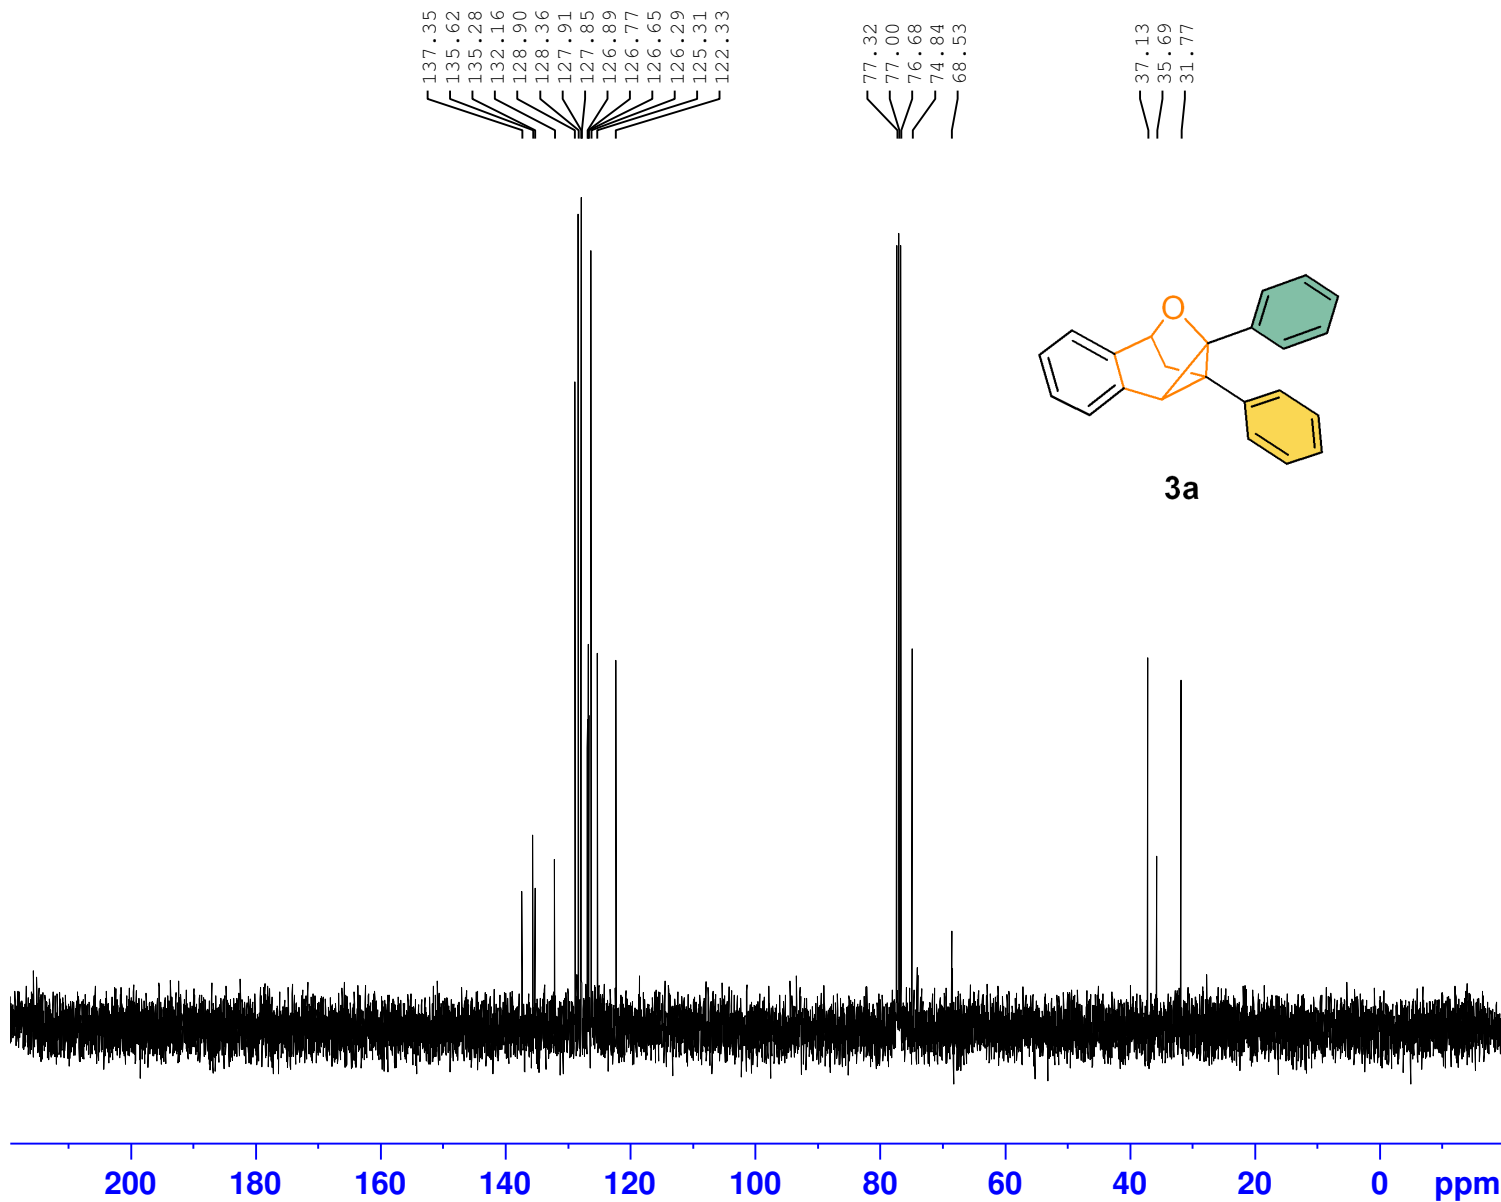

Current Data Parameters  
 NAME lsx-p3-3a-c-fr  
 EXPNO 1  
 PROCNO 1

F2 - Acquisition Parameters  
 Date\_ 20220726  
 Time 17.21  
 INSTRUM spect  
 PROBHD 5 mm DUL 13C-1  
 PULPROG zgpg30  
 TD 65536  
 SOLVENT CDCl3  
 NS 46  
 DS 1  
 SWH 24038.461 Hz  
 FIDRES 0.366798 Hz  
 AQ 1.3631488 sec  
 RG 2050  
 DW 20.800 usec  
 DE 6.00 usec  
 TE 293.1 K  
 D1 2.00000000 sec  
 D11 0.03000000 sec  
 TD0 1

==== CHANNEL f1 =====  
 NUC1 13C  
 P1 40.00 usec  
 PL1 -3.00 dB  
 PL1W 60.64365387 W  
 SFO1 100.6228298 MHz

==== CHANNEL f2 =====  
 CPDPRG[2] waltz16  
 NUC2 1H  
 PCPD2 80.00 usec  
 PL2 -1.00 dB  
 PL12 14.39 dB  
 PL13 18.00 dB  
 PL2W 12.17476940 W  
 PL12W 0.35193357 W  
 PL13W 0.15327126 W  
 SFO2 400.1316005 MHz

F2 - Processing parameters  
 SI 32768  
 SF 100.6127769 MHz  
 WDW EM  
 SSB 0  
 LB 1.00 Hz  
 GB 0  
 PC 1.40

7.264  
7.246  
7.229  
7.210  
7.206  
7.191  
7.189  
7.178  
7.156  
7.151  
6.946  
6.940  
6.923  
6.902  
6.896

5.313  
5.298

3.184  
2.665  
2.650  
2.636  
2.621

1.729  
1.699

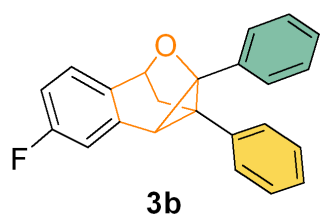

Current Data Parameters  
NAME lsx-1-174-h-fr  
EXPNO 1  
PROCNO 1

F2 - Acquisition Parameters  
Date\_ 20220104  
Time 15.40  
INSTRUM spect  
PROBHD 5 mm PABBO BB/  
PULPROG zg30  
TD 65536  
SOLVENT CDC13  
NS 16  
DS 2  
SWH 8012.820 Hz  
FIDRES 0.122266 Hz  
AQ 4.0894465 sec  
RG 164.33  
DW 62.400 usec  
DE 6.50 usec  
TE 295.3 K  
D1 1.00000000 sec  
TD0 1

==== CHANNEL f1 =====  
SFO1 400.1324710 MHz  
NUC1 1H  
P1 14.50 usec  
PLW1 11.99499989 W

F2 - Processing parameters  
SI 65536  
SF 400.1300192 MHz  
WDW EM  
SSB 0  
LB 0.30 Hz  
GB 0  
PC 1.00

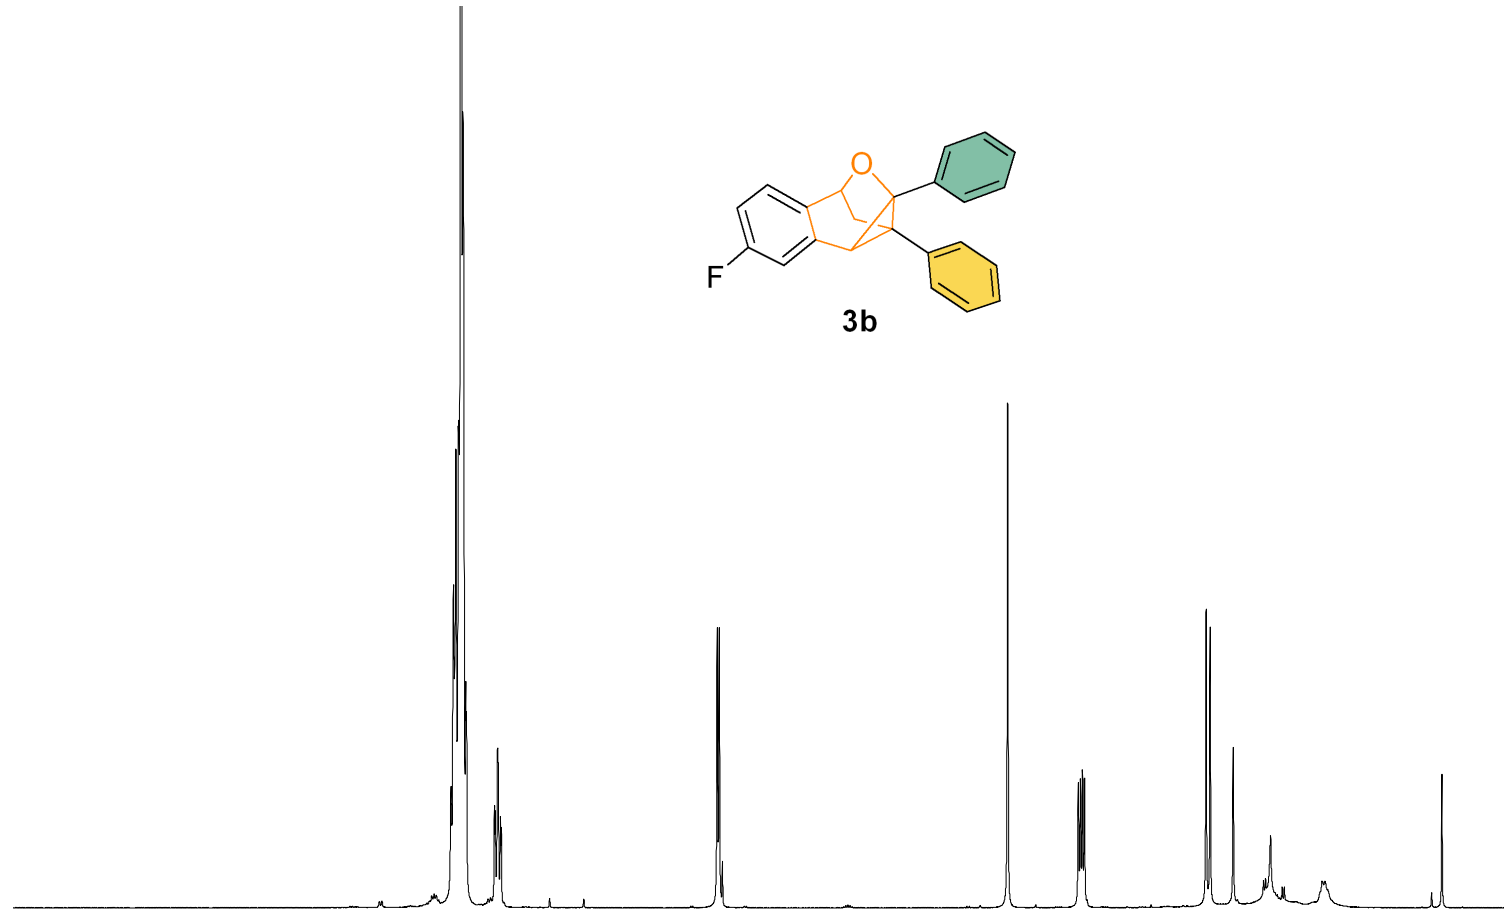

10 9 8 7 6 5 4 3 2 1 ppm

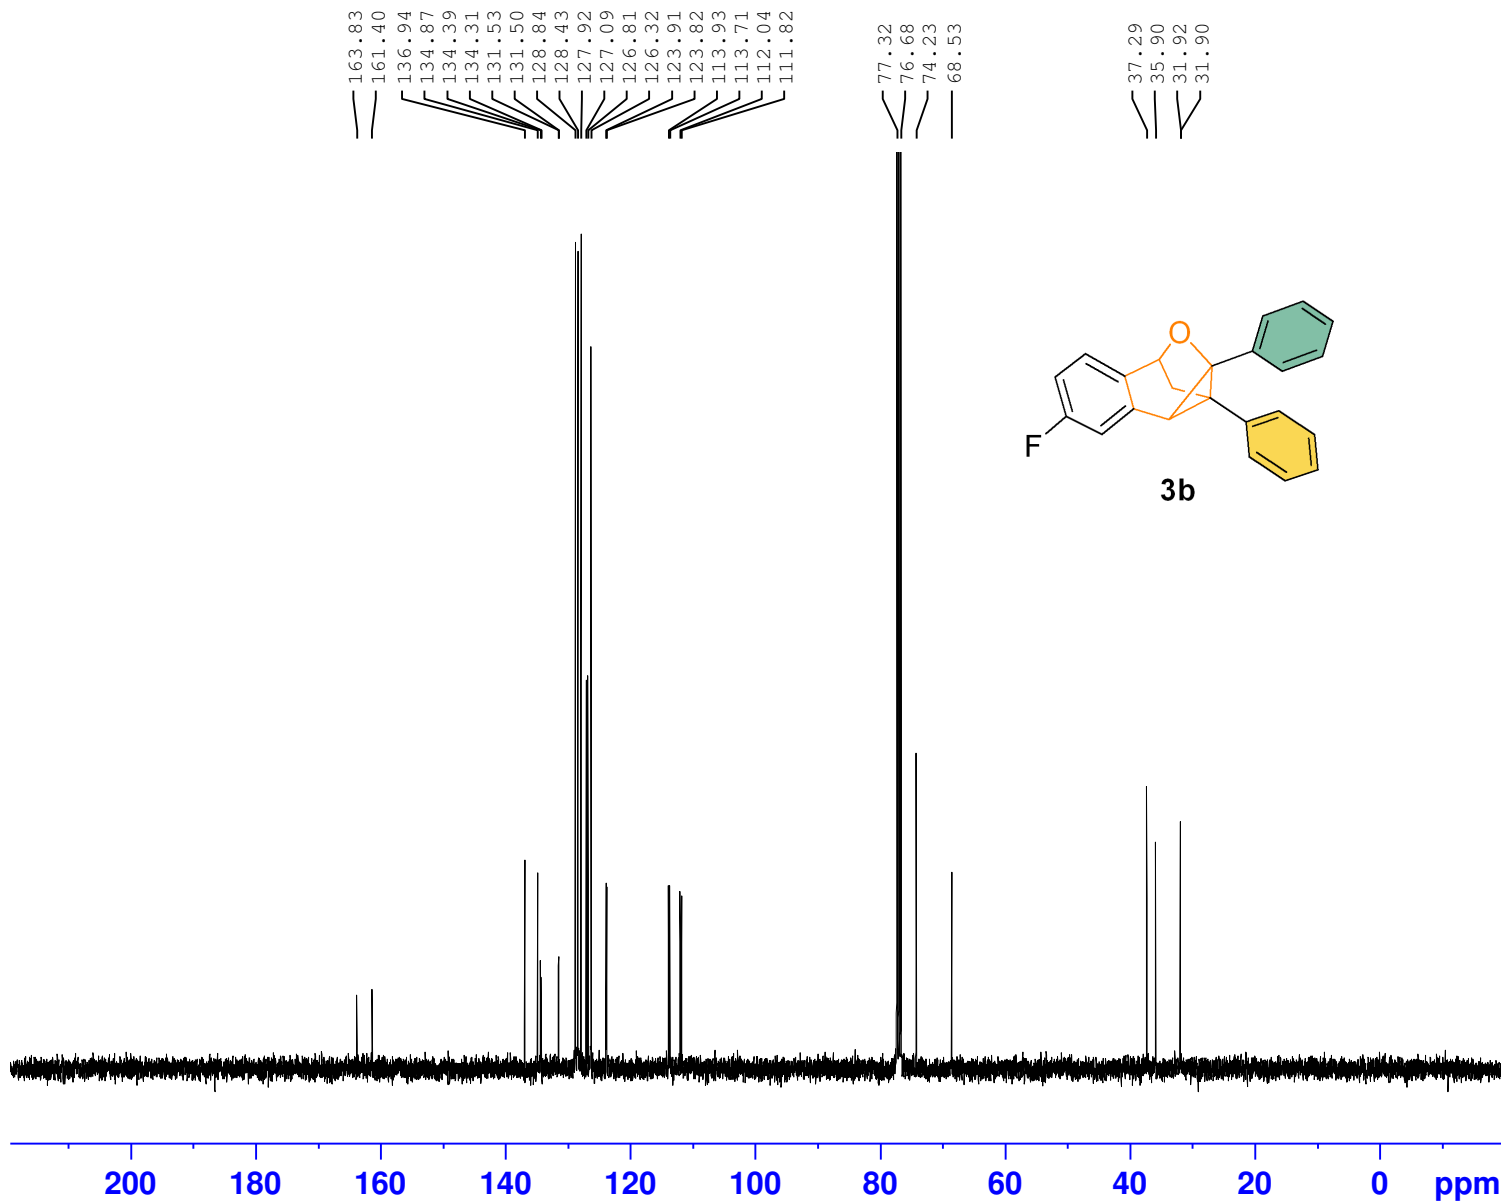

163.83  
161.40  
136.94  
134.87  
134.39  
134.31  
131.53  
131.50  
128.84  
128.43  
127.92  
127.09  
126.81  
126.32  
123.91  
123.82  
113.93  
113.71  
112.04  
111.82

77.32  
76.68  
74.23  
68.53

37.29  
35.90  
31.92  
31.90

Current Data Parameters  
NAME lsx-1-174-c-fr  
EXPNO 1  
PROCNO 1

F2 - Acquisition Parameters  
Date\_ 20220104  
Time 15.53  
INSTRUM spect  
PROBHD 5 mm PABBO BB/  
PULPROG zgpg30  
TD 65536  
SOLVENT CDC13  
NS 209  
DS 2  
SWH 24038.461 Hz  
FIDRES 0.366798 Hz  
AQ 1.3631488 sec  
RG 196.92  
DW 20.800 usec  
DE 6.50 usec  
TE 296.0 K  
D1 2.00000000 sec  
D11 0.03000000 sec  
TD0 1

==== CHANNEL f1 =====  
SFO1 100.6228298 MHz  
NUC1 13C  
P1 9.70 usec  
PLW1 46.98899841 W

==== CHANNEL f2 =====  
SFO2 400.1316005 MHz  
NUC2 1H  
CPDPRG[2] waltz16  
PCPD2 90.00 usec  
PLW2 11.99499989 W  
PLW12 0.34213999 W  
PLW13 0.27713001 W

F2 - Processing parameters  
SI 32768  
SF 100.6127748 MHz  
WDW EM  
SSB 0  
LB 1.00 Hz  
GB 0  
PC 1.40

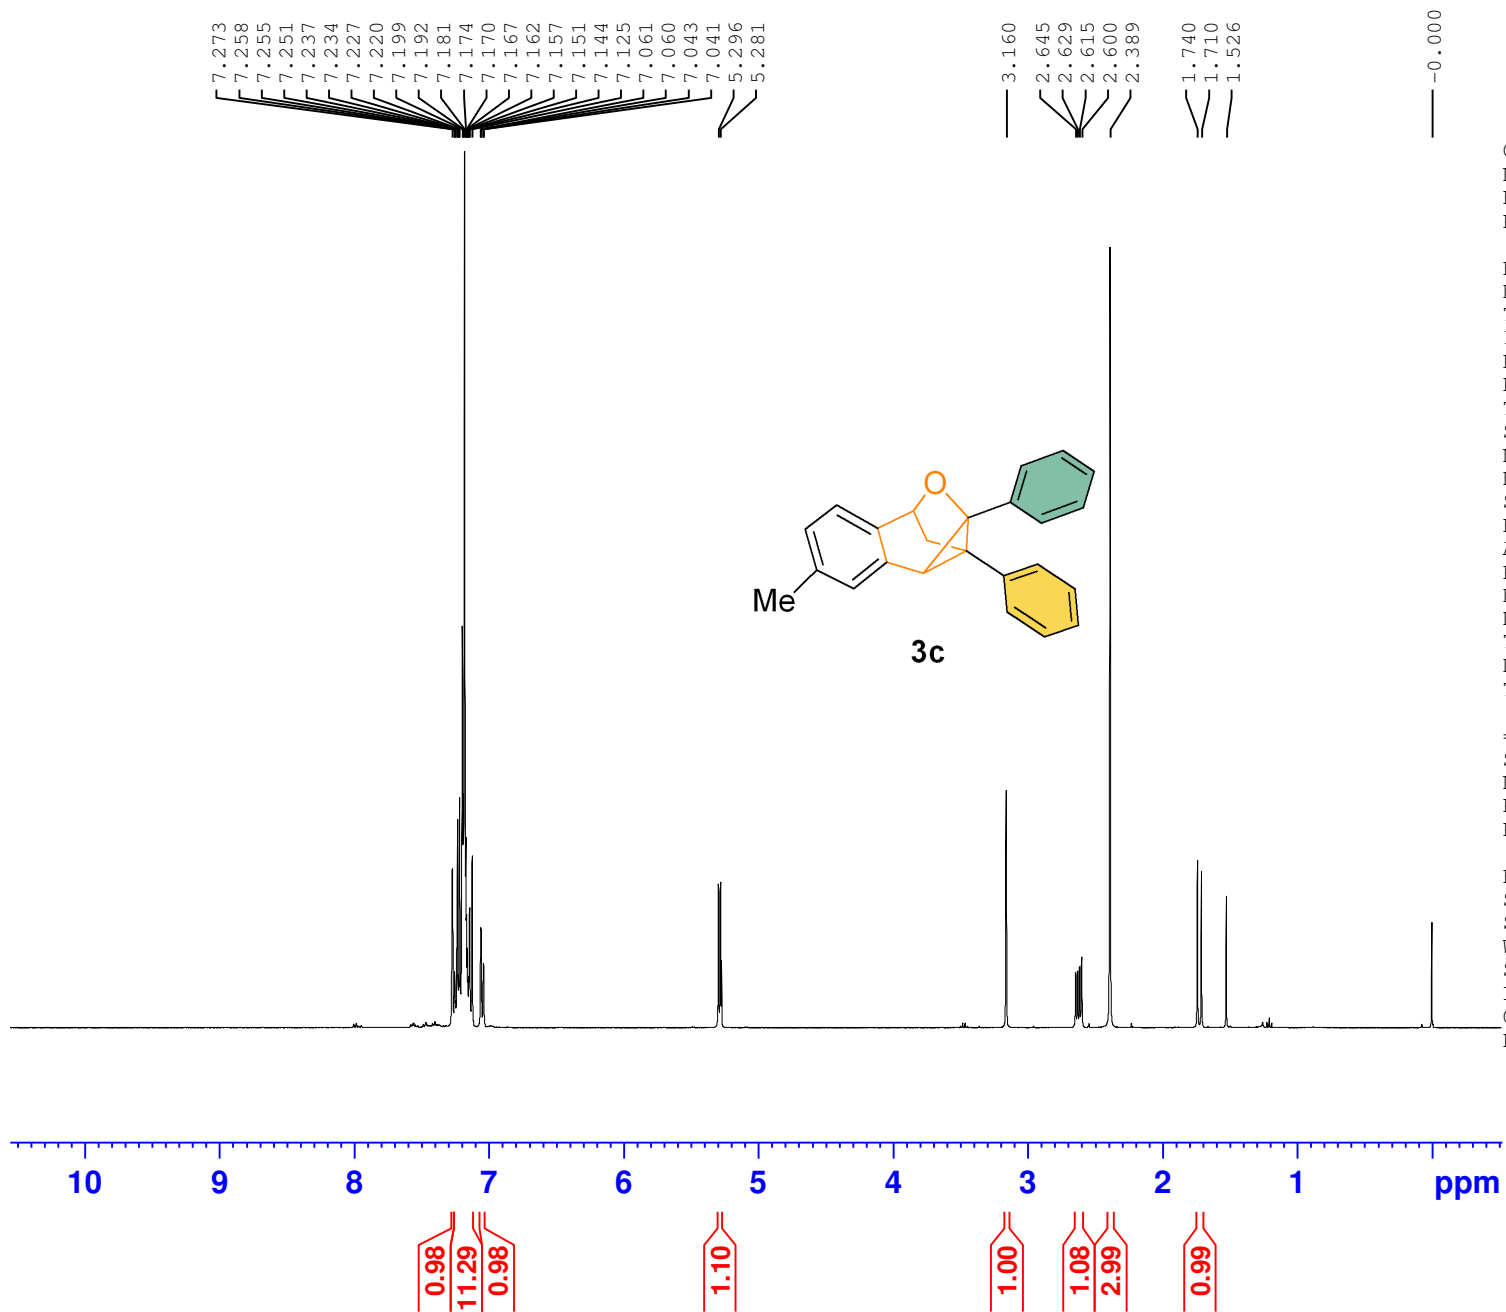

Current Data Parameters  
 NAME lsx-2-9c-h  
 EXPNO 1  
 PROCNO 1

F2 - Acquisition Parameters  
 Date\_ 20220122  
 Time 12.25  
 INSTRUM spect  
 PROBHD 5 mm PABBO BB/  
 PULPROG zg30  
 TD 65536  
 SOLVENT CDCl3  
 NS 7  
 DS 2  
 SWH 8012.820 Hz  
 FIDRES 0.122266 Hz  
 AQ 4.0894465 sec  
 RG 82.92  
 DW 62.400 usec  
 DE 6.50 usec  
 TE 295.1 K  
 D1 1.00000000 sec  
 TD0 1

==== CHANNEL f1 =====  
 SFO1 400.1324710 MHz  
 NUC1 1H  
 P1 14.50 usec  
 PLW1 11.99499989 W

F2 - Processing parameters  
 SI 65536  
 SF 400.1300205 MHz  
 WDW EM  
 SSB 0  
 LB 0.30 Hz  
 GB 0  
 PC 1.00

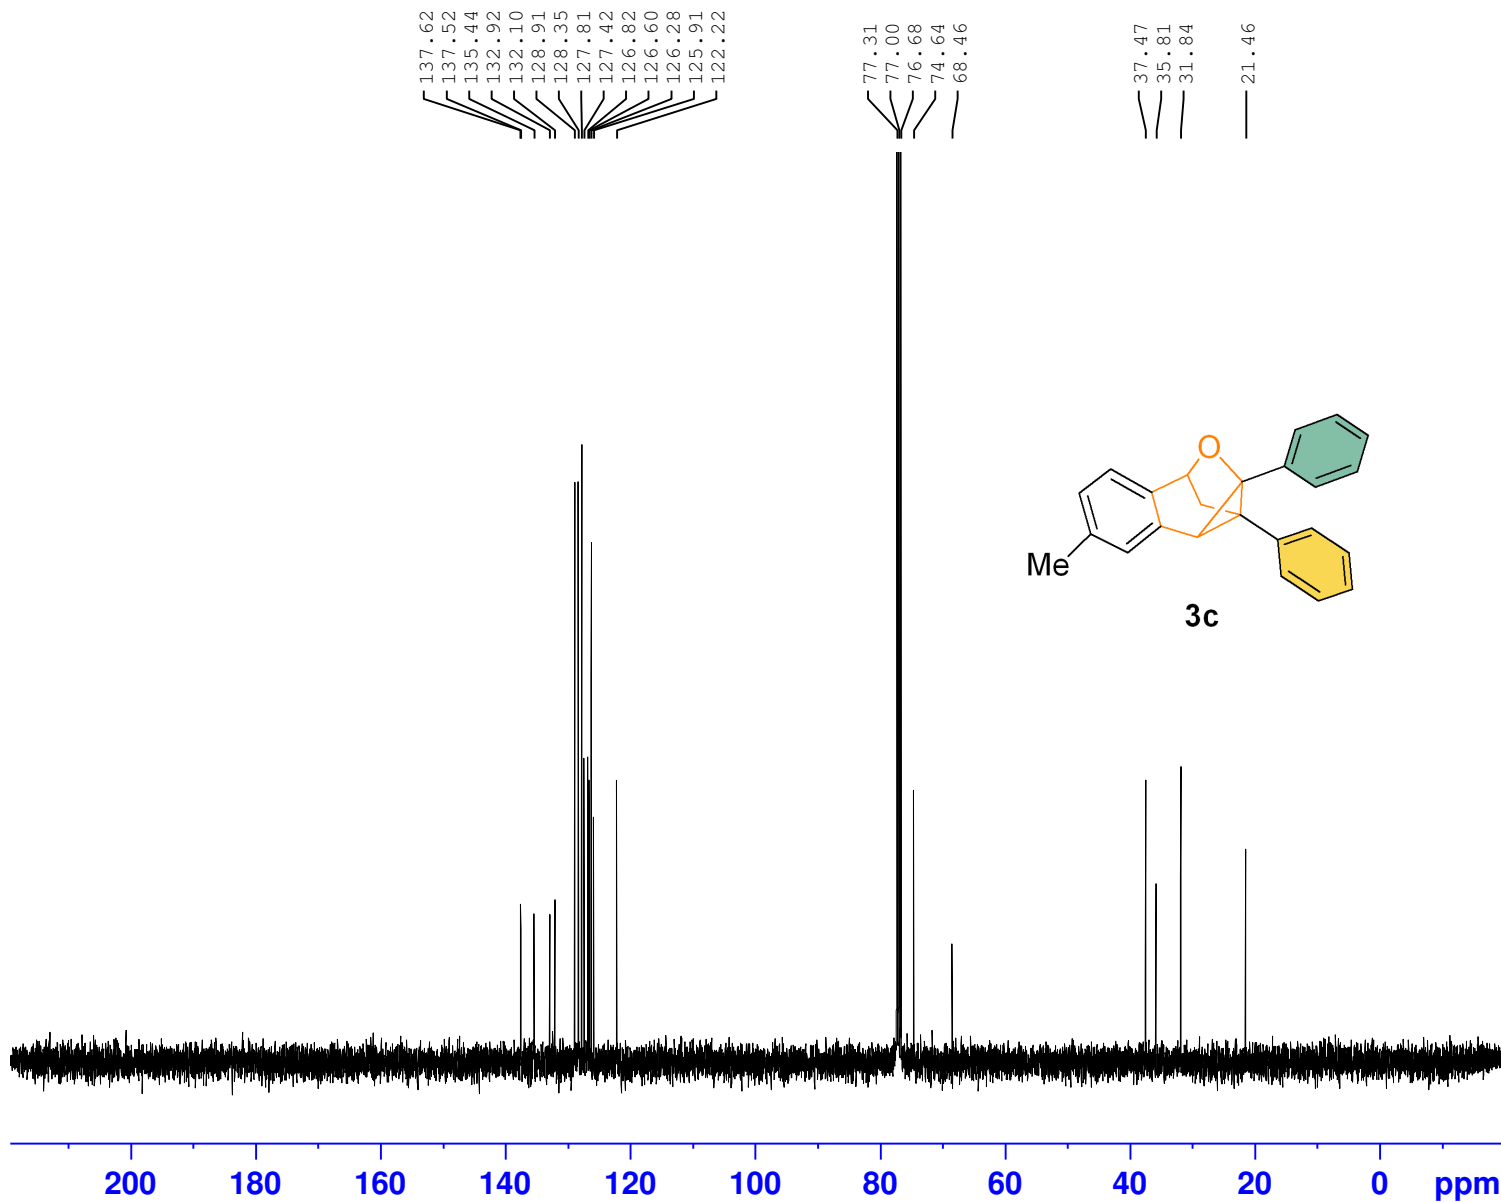

Current Data Parameters  
 NAME lsx-2-9c-c  
 EXPNO 1  
 PROCNO 1

F2 - Acquisition Parameters  
 Date\_ 20220122  
 Time 12.28  
 INSTRUM spect  
 PROBHD 5 mm PABBO BB/  
 PULPROG zgpg30  
 TD 65536  
 SOLVENT CDC13  
 NS 40  
 DS 2  
 SWH 24038.461 Hz  
 FIDRES 0.366798 Hz  
 AQ 1.3631488 sec  
 RG 196.92  
 DW 20.800 usec  
 DE 6.50 usec  
 TE 295.9 K  
 D1 2.00000000 sec  
 D11 0.03000000 sec  
 TD0 1

==== CHANNEL f1 =====  
 SFO1 100.6228298 MHz  
 NUC1 13C  
 P1 9.70 usec  
 PLW1 46.98899841 W

==== CHANNEL f2 =====  
 SFO2 400.1316005 MHz  
 NUC2 1H  
 CPDPRG[2] waltz16  
 PCPD2 90.00 usec  
 PLW2 11.99499989 W  
 PLW12 0.34213999 W  
 PLW13 0.27713001 W

F2 - Processing parameters  
 SI 32768  
 SF 100.6127754 MHz  
 WDW EM  
 SSB 0  
 LB 1.00 Hz  
 GB 0  
 PC 1.40

8.332  
8.311  
7.905  
7.884  
7.743  
7.723  
7.590  
7.572  
7.553  
7.507  
7.488  
7.470  
7.423  
7.403  
7.286  
7.273  
7.266  
7.239  
7.236  
7.219  
7.209  
7.199  
7.195  
7.177  
7.160  
5.461  
5.446

3.921

2.703  
2.688  
2.673  
2.658

1.739  
1.710  
1.501  
1.257

-0.000

Current Data Parameters  
NAME lsx-1-176-h-fr  
EXPNO 1  
PROCNO 1

F2 - Acquisition Parameters  
Date\_ 20220104  
Time 15.59  
INSTRUM spect  
PROBHD 5 mm PABBO BB/  
PULPROG zg30  
TD 65536  
SOLVENT CDC13  
NS 16  
DS 2  
SWH 8012.820 Hz  
FIDRES 0.122266 Hz  
AQ 4.0894465 sec  
RG 112.31  
DW 62.400 usec  
DE 6.50 usec  
TE 295.3 K  
D1 1.00000000 sec  
TD0 1

==== CHANNEL f1 =====  
SFO1 400.1324710 MHz  
NUC1 1H  
P1 14.50 usec  
PLW1 11.99499989 W

F2 - Processing parameters  
SI 65536  
SF 400.1300303 MHz  
WDW EM  
SSB 0  
LB 0.30 Hz  
GB 0  
PC 1.00

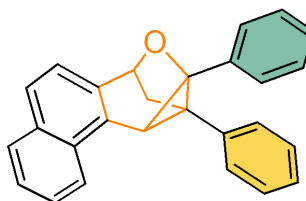

3d

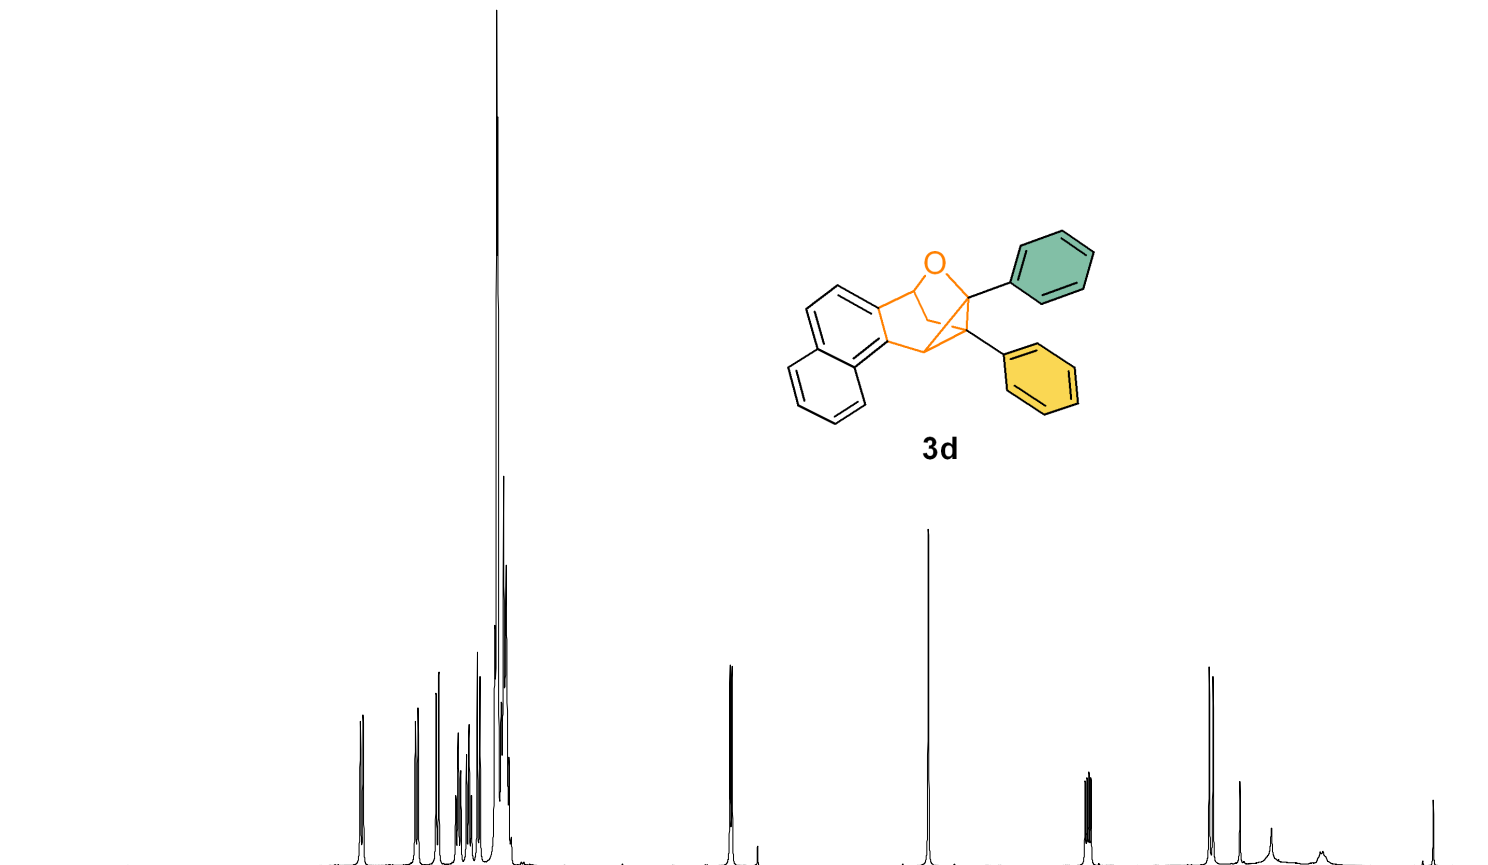

1.01  
1.00  
1.01  
1.03  
1.06  
1.05  
10.22

1.00

1.01

1.00

1.03

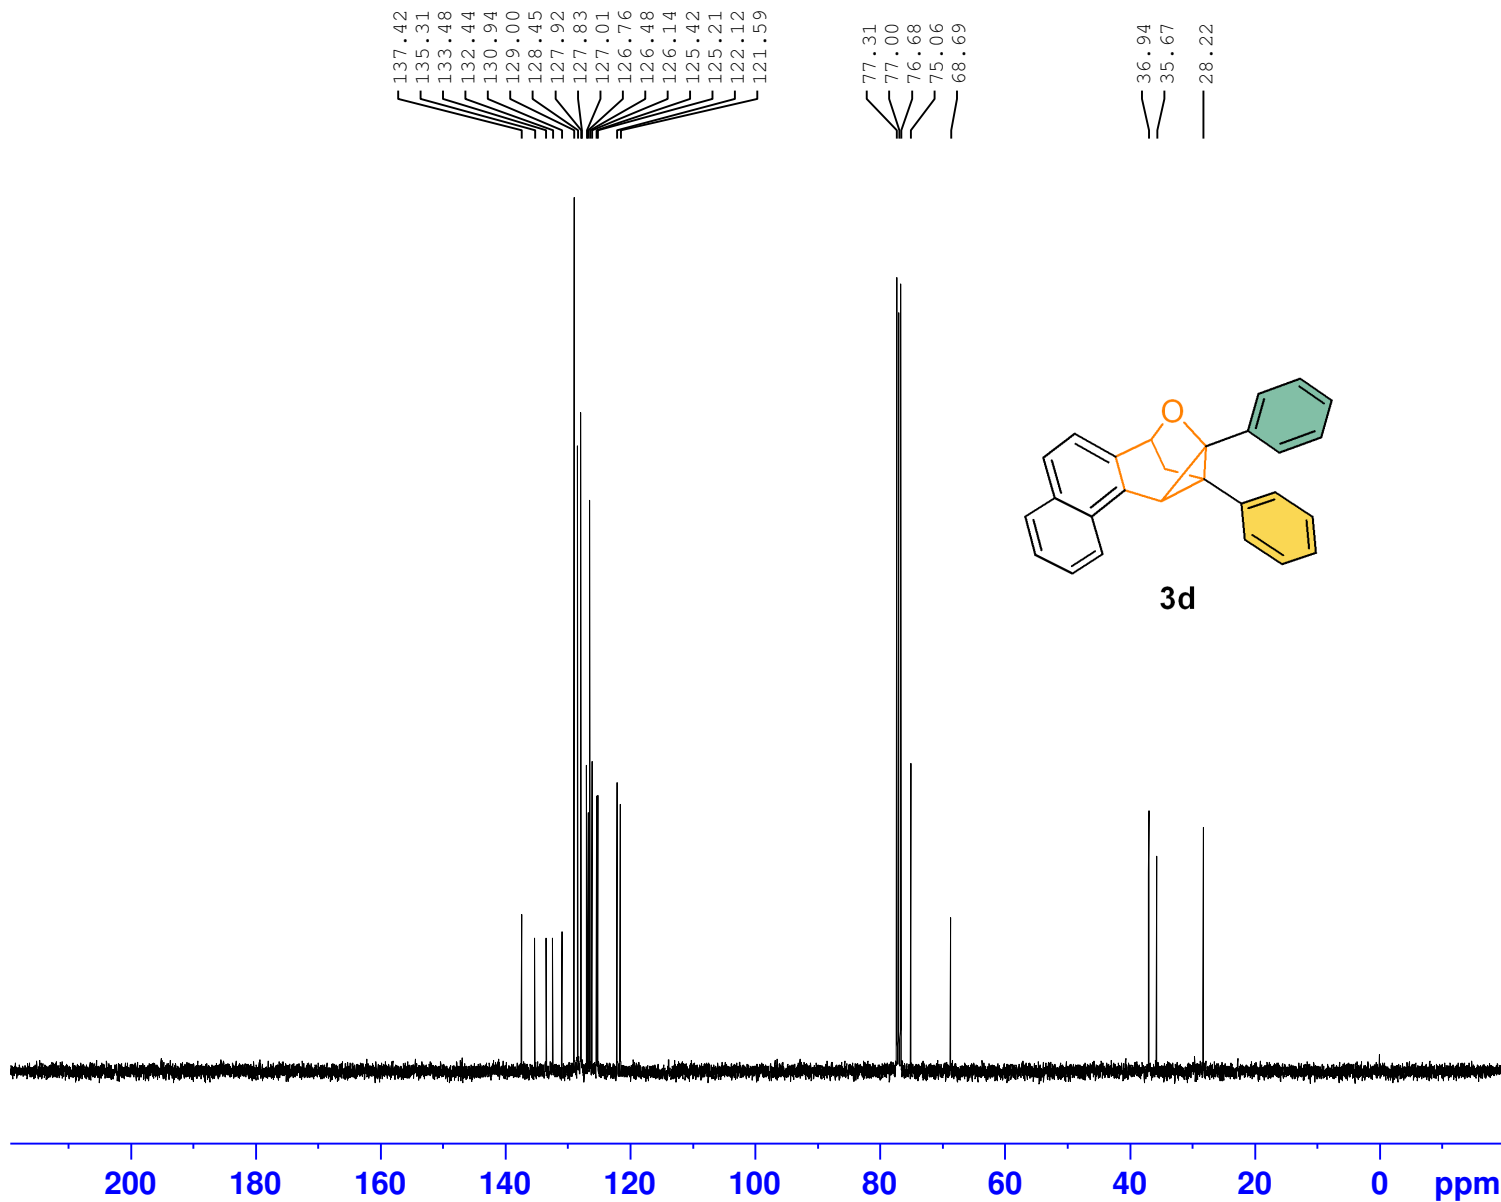

Current Data Parameters  
 NAME lsx-1-176-c-fr  
 EXPNO 1  
 PROCNO 1

F2 - Acquisition Parameters  
 Date\_ 20220104  
 Time 16.07  
 INSTRUM spect  
 PROBHD 5 mm PABBO BB/  
 PULPROG zgpg30  
 TD 65536  
 SOLVENT CDC13  
 NS 118  
 DS 2  
 SWH 24038.461 Hz  
 FIDRES 0.366798 Hz  
 AQ 1.3631488 sec  
 RG 196.92  
 DW 20.800 usec  
 DE 6.50 usec  
 TE 296.4 K  
 D1 2.00000000 sec  
 D11 0.03000000 sec  
 TD0 1

==== CHANNEL f1 =====  
 SFO1 100.6228298 MHz  
 NUC1 13C  
 P1 9.70 usec  
 PLW1 46.98899841 W

==== CHANNEL f2 =====  
 SFO2 400.1316005 MHz  
 NUC2 1H  
 CPDPRG[2] waltz16  
 PCPD2 90.00 usec  
 PLW2 11.99499989 W  
 PLW12 0.34213999 W  
 PLW13 0.27713001 W

F2 - Processing parameters  
 SI 32768  
 SF 100.6127780 MHz  
 WDW EM  
 SSB 0  
 LB 1.00 Hz  
 GB 0  
 PC 1.40

7.353  
7.333  
7.254  
7.251  
7.246  
7.243  
7.232  
7.230  
7.223  
7.215  
7.192  
7.185  
7.179  
7.171  
7.167  
7.165  
7.159  
7.156  
7.154  
7.152  
7.149  
6.903  
6.897  
6.883  
6.876  
6.834  
6.828  
5.269  
5.254

3.809  
3.163  
2.642  
2.640  
2.626  
2.624  
2.612  
2.610  
2.597  
2.595  
1.746  
1.716

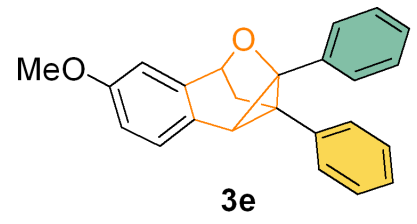

Current Data Parameters  
NAME lsx-2-9d-h  
EXPNO 1  
PROCNO 1

F2 - Acquisition Parameters  
Date\_ 20220122  
Time 12.31  
INSTRUM spect  
PROBHD 5 mm PABBO BB/  
PULPROG zg30  
TD 65536  
SOLVENT CDC13  
NS 7  
DS 2  
SWH 8012.820 Hz  
FIDRES 0.122266 Hz  
AQ 4.0894465 sec  
RG 54.81  
DW 62.400 usec  
DE 6.50 usec  
TE 295.1 K  
D1 1.00000000 sec  
TD0 1

==== CHANNEL f1 =====  
SFO1 400.1324710 MHz  
NUC1 1H  
P1 14.50 usec  
PLW1 11.99499989 W

F2 - Processing parameters  
SI 65536  
SF 400.1300246 MHz  
WDW EM  
SSB 0  
LB 0.30 Hz  
GB 0  
PC 1.00

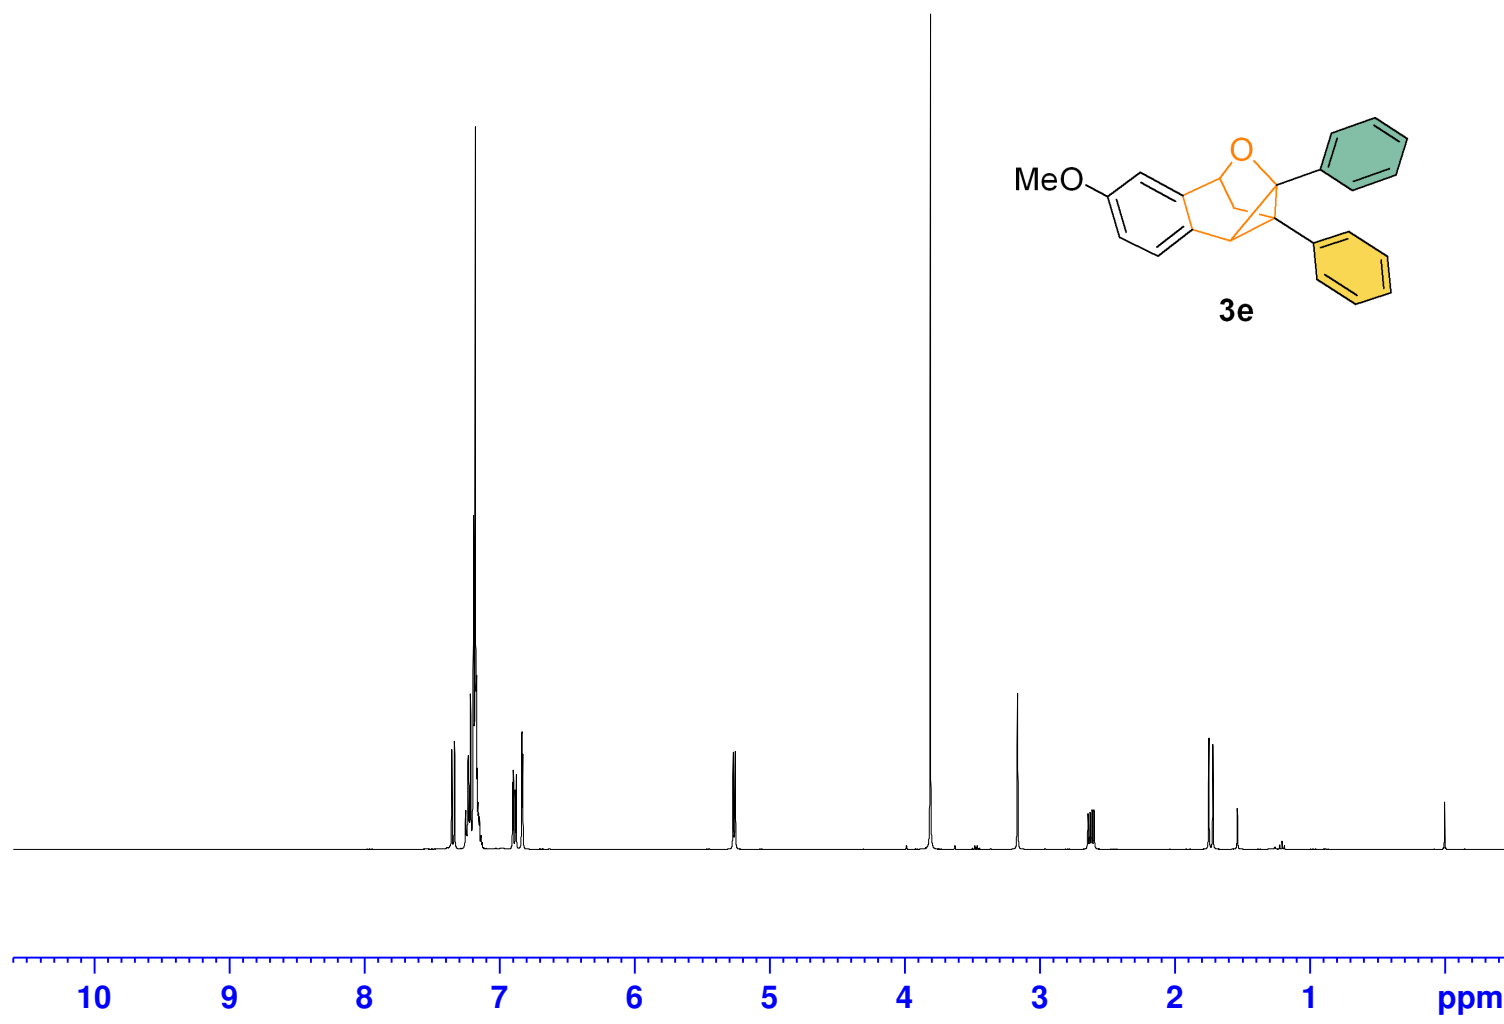

1.04  
10.19  
1.00  
0.99  
1.06  
3.03  
1.00  
1.01  
1.02



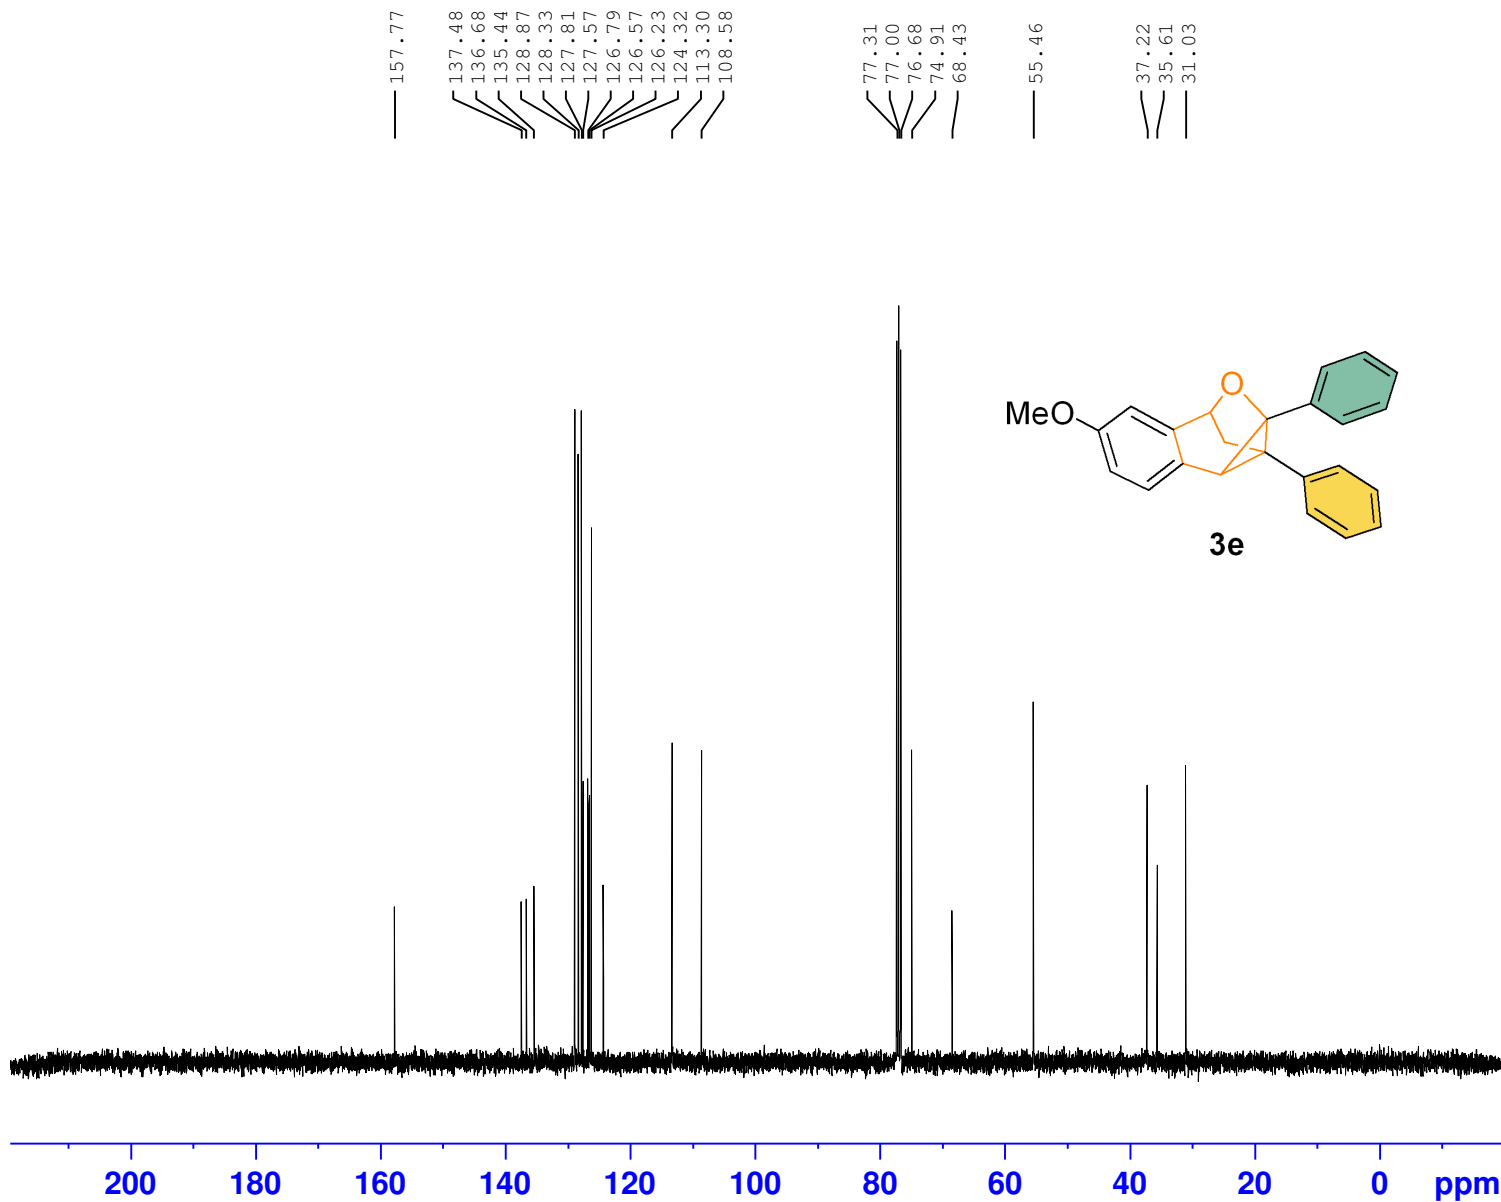

Current Data Parameters  
 NAME lsx-2-9d-c  
 EXPNO 1  
 PROCNO 1

F2 - Acquisition Parameters  
 Date\_ 20220122  
 Time 12.35  
 INSTRUM spect  
 PROBHD 5 mm PABBO BB/  
 PULPROG zgpg30  
 TD 65536  
 SOLVENT CDC13  
 NS 59  
 DS 2  
 SWH 24038.461 Hz  
 FIDRES 0.366798 Hz  
 AQ 1.3631488 sec  
 RG 196.92  
 DW 20.800 usec  
 DE 6.50 usec  
 TE 296.0 K  
 D1 2.00000000 sec  
 D11 0.03000000 sec  
 TD0 1

==== CHANNEL f1 =====  
 SFO1 100.6228298 MHz  
 NUC1 13C  
 P1 9.70 usec  
 PLW1 46.98899841 W

==== CHANNEL f2 =====  
 SFO2 400.1316005 MHz  
 NUC2 1H  
 CPDPRG[2] waltz16  
 PCPD2 90.00 usec  
 PLW2 11.99499989 W  
 PLW12 0.34213999 W  
 PLW13 0.27713001 W

F2 - Processing parameters  
 SI 32768  
 SF 100.6127777 MHz  
 WDW EM  
 SSB 0  
 LB 1.00 Hz  
 GB 0  
 PC 1.40

7.448  
7.437  
7.432  
7.430  
7.430  
7.345  
7.337  
7.331  
7.326  
7.323  
7.318  
7.313  
7.304  
7.251  
7.248  
7.239  
7.232  
7.230  
7.224  
7.218  
7.210  
7.203  
7.177  
7.171  
7.166  
7.163  
7.159  
7.156  
7.149  
7.144  
7.142  
7.140  
7.140  
6.837  
6.815  
6.764  
6.757  
6.751  
6.740  
6.740  
6.734  
6.727  
5.283  
5.268  
3.775  
3.711  
3.157  
2.677  
2.675  
2.662  
2.660  
2.647  
2.646  
2.632  
2.630  
1.722  
1.693

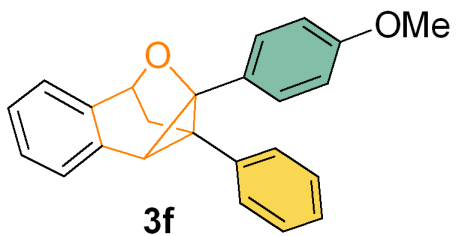

Current Data Parameters  
NAME lsx-2-9b-h  
EXPNO 1  
PROCNO 1

F2 - Acquisition Parameters  
Date\_ 20220122  
Time 12.21  
INSTRUM spect  
PROBHD 5 mm PABBO BB/  
PULPROG zg30  
TD 65536  
SOLVENT CDCl3  
NS 9  
DS 2  
SWH 8012.820 Hz  
FIDRES 0.122266 Hz  
AQ 4.0894465 sec  
RG 27.78  
DW 62.400 usec  
DE 6.50 usec  
TE 295.2 K  
D1 1.00000000 sec  
TD0 1

==== CHANNEL f1 =====  
SFO1 400.1324710 MHz  
NUC1 1H  
P1 14.50 usec  
PLW1 11.99499989 W

F2 - Processing parameters  
SI 65536  
SF 400.1300322 MHz  
WDW EM  
SSB 0  
LB 0.30 Hz  
GB 0  
PC 1.00

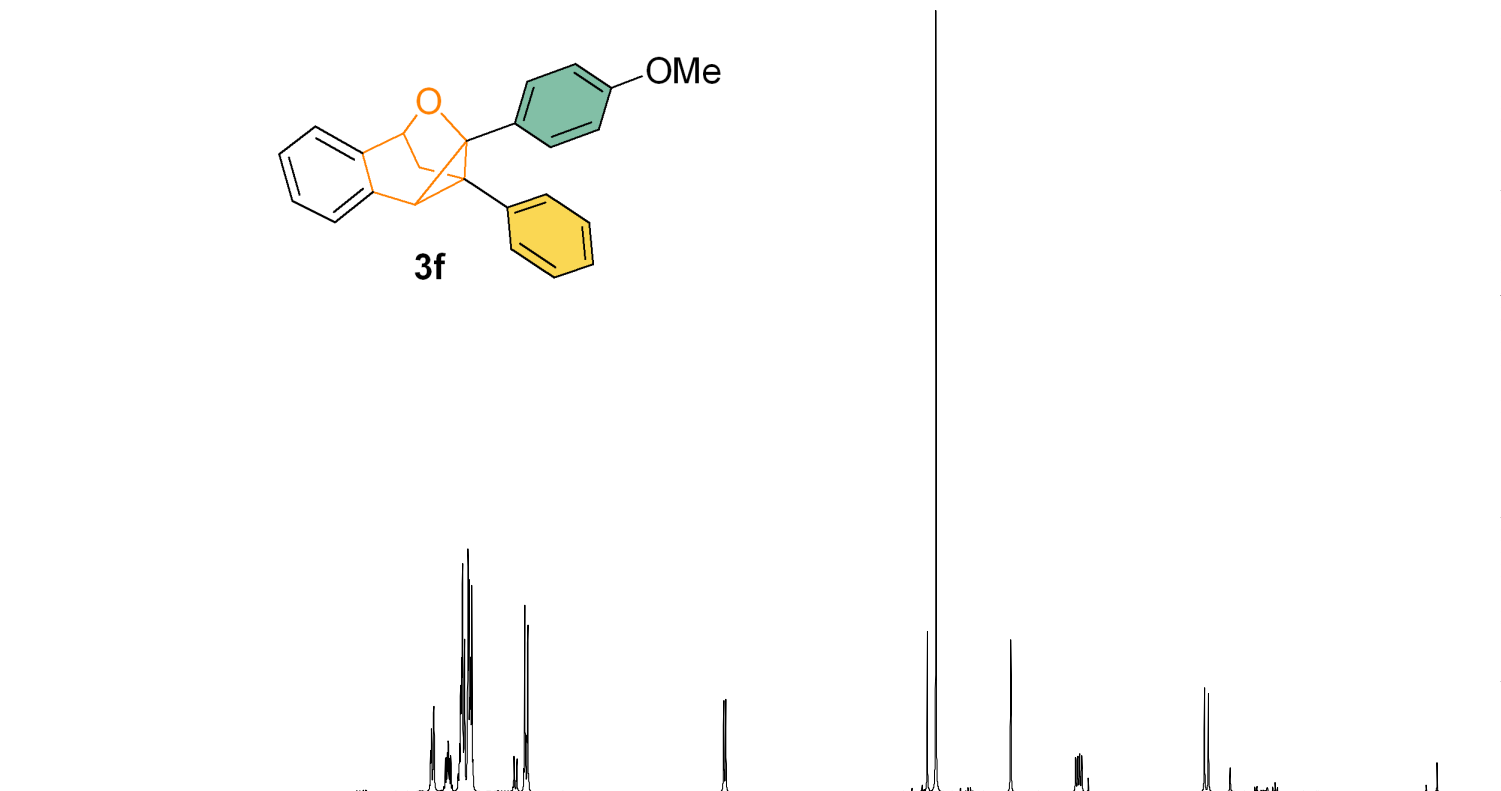

1.14  
0.99  
4.12  
4.83  
1.90  
1.00  
3.03  
1.00  
1.00  
1.00

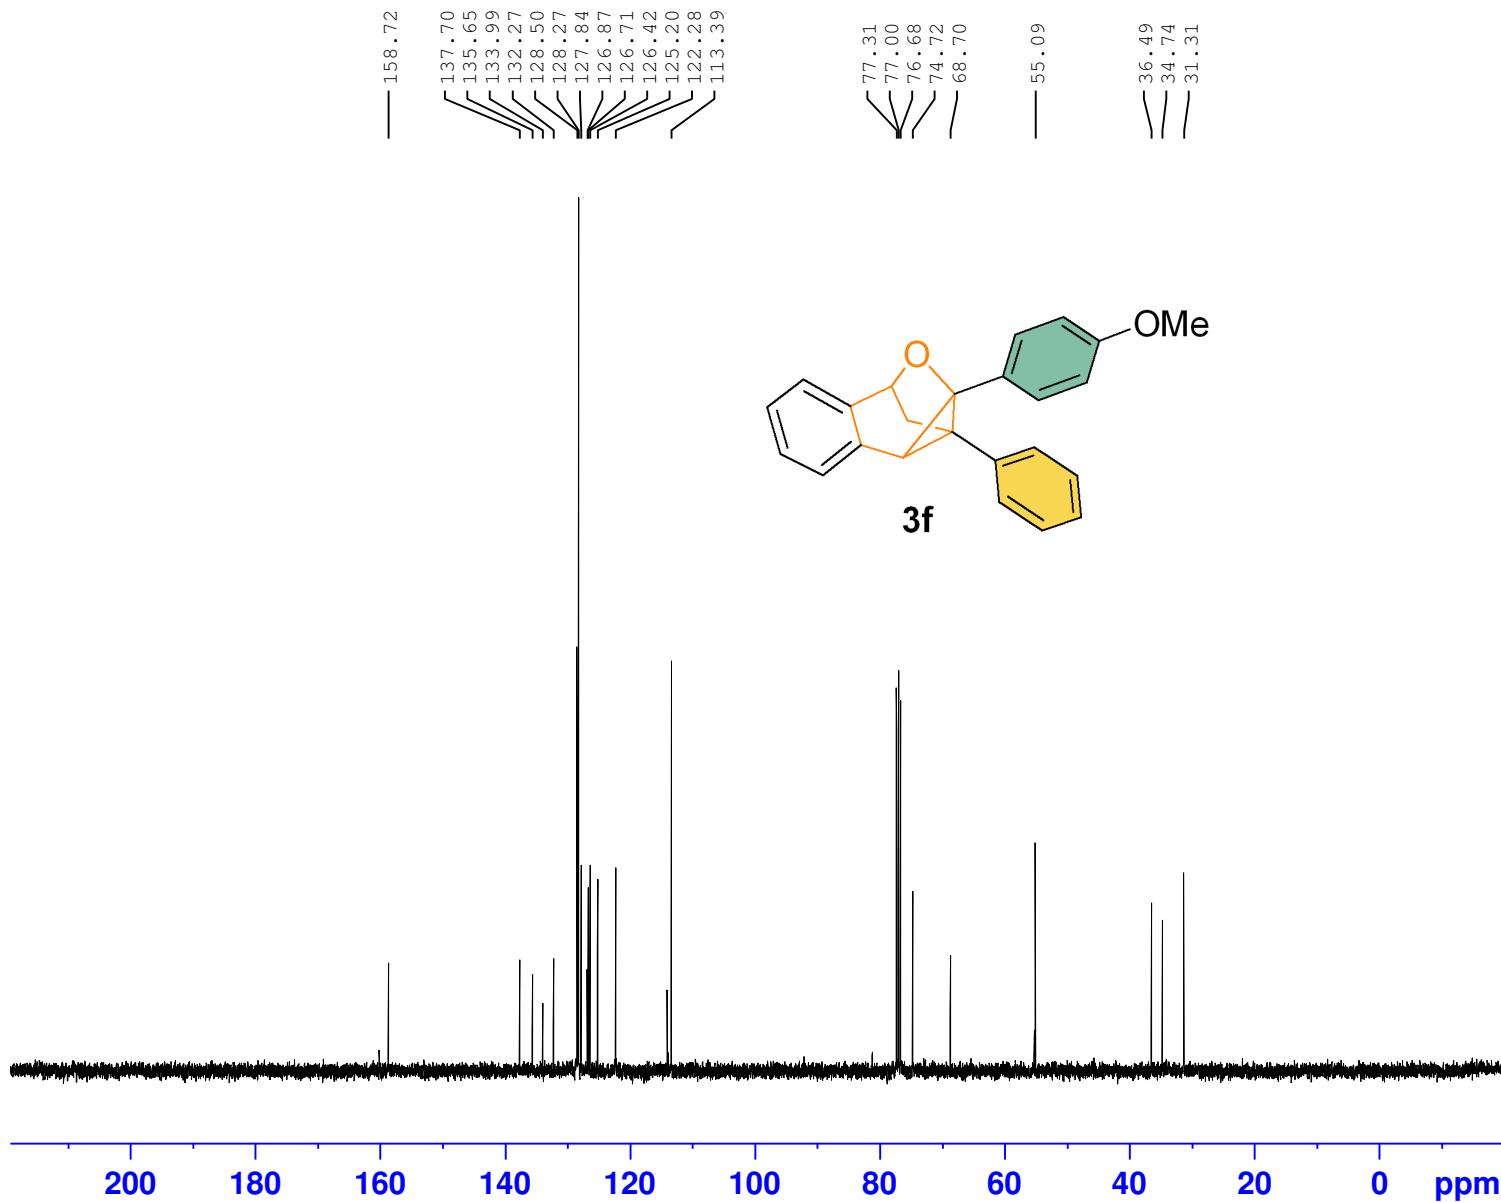

Current Data Parameters  
 NAME lsx-2-9b-c  
 EXPNO 1  
 PROCNO 1

F2 - Acquisition Parameters  
 Date\_ 20220122  
 Time 12.22  
 INSTRUM spect  
 PROBHD 5 mm PABBO BB/  
 PULPROG zgpg30  
 TD 65536  
 SOLVENT CDC13  
 NS 21  
 DS 2  
 SWH 24038.461 Hz  
 FIDRES 0.366798 Hz  
 AQ 1.3631488 sec  
 RG 196.92  
 DW 20.800 usec  
 DE 6.50 usec  
 TE 295.7 K  
 D1 2.00000000 sec  
 D11 0.03000000 sec  
 TD0 1

==== CHANNEL f1 =====  
 SFO1 100.6228298 MHz  
 NUC1 13C  
 P1 9.70 usec  
 PLW1 46.98899841 W

==== CHANNEL f2 =====  
 SFO2 400.1316005 MHz  
 NUC2 1H  
 CPDPRG[2] waltz16  
 PCPD2 90.00 usec  
 PLW2 11.99499989 W  
 PLW12 0.34213999 W  
 PLW13 0.27713001 W

F2 - Processing parameters  
 SI 32768  
 SF 100.6127814 MHz  
 WDW EM  
 SSB 0  
 LB 1.00 Hz  
 GB 0  
 PC 1.40

7.364  
7.358  
7.349  
7.346  
7.342  
7.339  
7.330  
7.324  
7.275  
7.272  
7.269  
7.256  
7.254  
7.245  
7.240  
7.238  
7.225  
7.221  
7.216  
7.213  
7.205  
7.199  
7.194  
7.190  
7.184  
7.178  
7.174  
7.170  
7.167  
7.161  
7.150  
7.145  
7.139  
7.112  
7.106  
7.101  
7.090  
7.084  
7.079  
5.317  
5.302  
3.183  
2.635  
2.633  
2.619  
2.617  
2.605  
2.603  
2.590  
2.588  
1.739  
1.710  
1.523  
-0.000

Current Data Parameters  
NAME lsx-2-9a-h  
EXPNO 1  
PROCNO 1

F2 - Acquisition Parameters  
Date\_ 20220122  
Time 12.16  
INSTRUM spect  
PROBHD 5 mm PABBO BB/  
PULPROG zg30  
TD 65536  
SOLVENT CDCl3  
NS 6  
DS 2  
SWH 8012.820 Hz  
FIDRES 0.122266 Hz  
AQ 4.0894465 sec  
RG 62.93  
DW 62.400 usec  
DE 6.50 usec  
TE 295.2 K  
D1 1.00000000 sec  
TD0 1

==== CHANNEL f1 =====  
SFO1 400.1324710 MHz  
NUC1 1H  
P1 14.50 usec  
PLW1 11.99499989 W

F2 - Processing parameters  
SI 65536  
SF 400.1300239 MHz  
WDW EM  
SSB 0  
LB 0.30 Hz  
GB 0  
PC 1.00

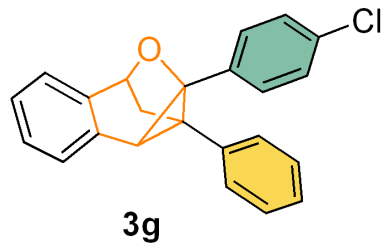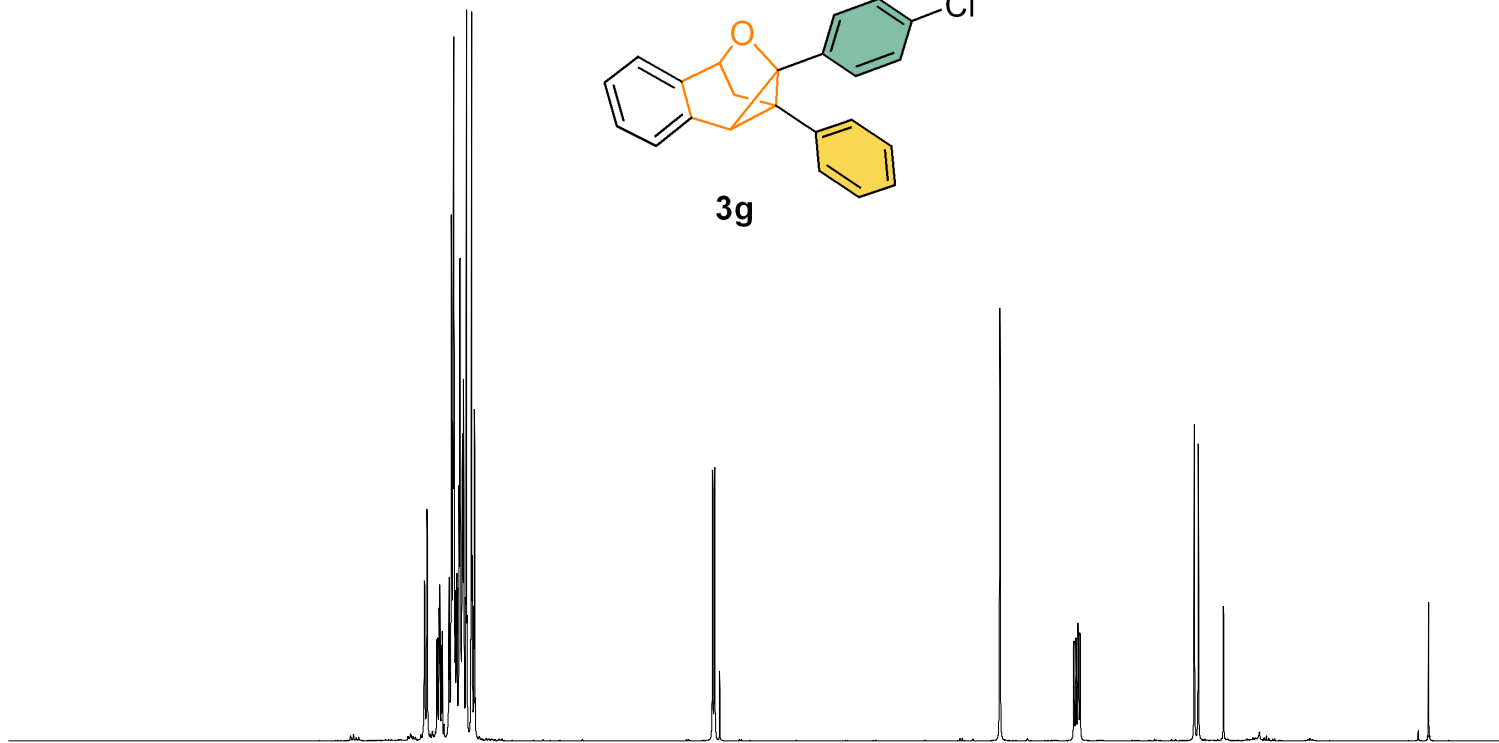

10 9 8 7 6 5 4 3 2 1 ppm

1.05  
1.00  
4.05  
4.97  
1.94  
0.99  
1.00  
1.06  
1.00

136.91  
135.49  
134.12  
132.59  
131.85  
128.95  
128.51  
128.00  
127.41  
126.87  
126.79  
125.48  
122.36

77.32  
77.00  
76.68  
74.94  
68.02

37.19  
35.96  
31.78

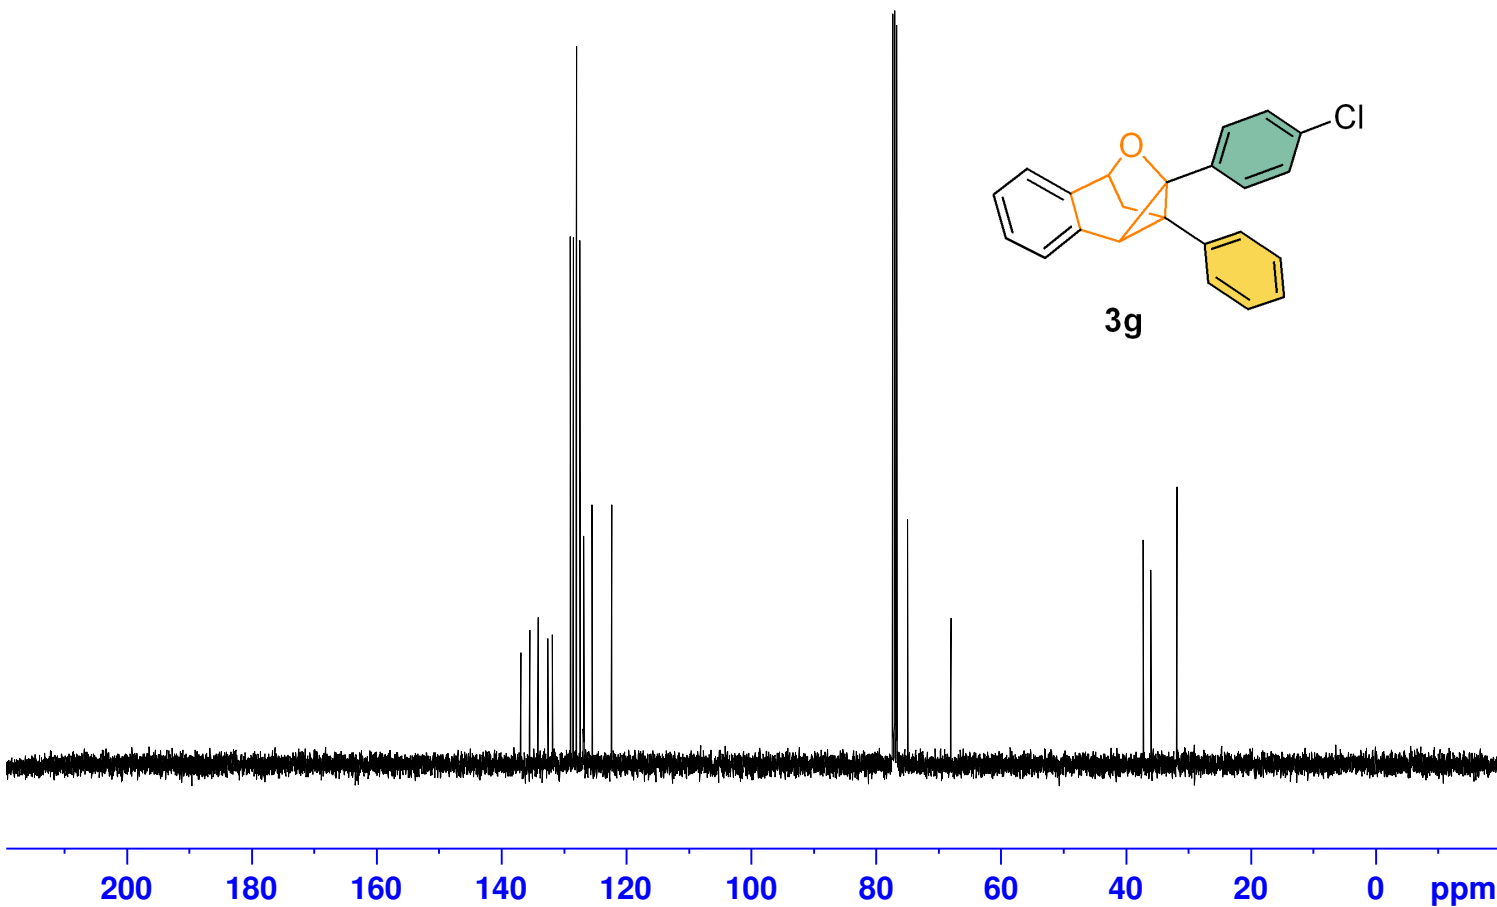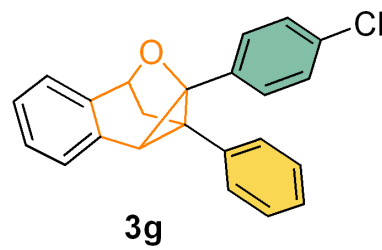

Current Data Parameters  
NAME lsx-2-9a-c  
EXPNO 1  
PROCNO 1

F2 - Acquisition Parameters  
Date\_ 20220122  
Time 12.18  
INSTRUM spect  
PROBHD 5 mm PABBO BB/  
PULPROG zgpg30  
TD 65536  
SOLVENT CDC13  
NS 30  
DS 2  
SWH 24038.461 Hz  
FIDRES 0.366798 Hz  
AQ 1.3631488 sec  
RG 196.92  
DW 20.800 usec  
DE 6.50 usec  
TE 295.9 K  
D1 2.00000000 sec  
D11 0.03000000 sec  
TD0 1

==== CHANNEL f1 =====  
SFO1 100.6228298 MHz  
NUC1 13C  
P1 9.70 usec  
PLW1 46.98899841 W

==== CHANNEL f2 =====  
SFO2 400.1316005 MHz  
NUC2 1H  
CPDPRG[2] waltz16  
PCPD2 90.00 usec  
PLW2 11.99499989 W  
PLW12 0.34213999 W  
PLW13 0.27713001 W

F2 - Processing parameters  
SI 32768  
SF 100.6127770 MHz  
WDW EM  
SSB 0  
LB 1.00 Hz  
GB 0  
PC 1.40

7.471  
7.455  
7.438  
7.434  
7.391  
7.385  
7.374  
7.369  
7.356  
7.350  
7.310  
7.306  
7.293  
7.290  
7.275  
7.271  
7.264  
7.259  
7.254  
7.247  
7.212  
7.208  
7.205  
7.196  
7.192  
7.188  
7.183  
5.366  
5.351

3.259  
2.626  
2.612  
2.611  
2.597  
2.596  
2.582  
1.785  
1.755  
1.565

0.000

Current Data Parameters  
NAME lsx-2-80-h-fr  
EXPNO 1  
PROCNO 1

F2 - Acquisition Parameters  
Date\_ 20220713  
Time 20.34  
INSTRUM spect  
PROBHD 5 mm PABBO BB/  
PULPROG zg30  
TD 65536  
SOLVENT CDCl3  
NS 7  
DS 2  
SWH 8012.820 Hz  
FIDRES 0.122266 Hz  
AQ 4.0894465 sec  
RG 142.88  
DW 62.400 usec  
DE 6.50 usec  
TE 295.6 K  
D1 1.00000000 sec  
TD0 1

==== CHANNEL f1 =====  
SFO1 400.1324710 MHz  
NUC1 1H  
P1 14.50 usec  
PLW1 11.99499989 W

F2 - Processing parameters  
SI 65536  
SF 400.1300127 MHz  
WDW EM  
SSB 0  
LB 0.30 Hz  
GB 0  
PC 1.00

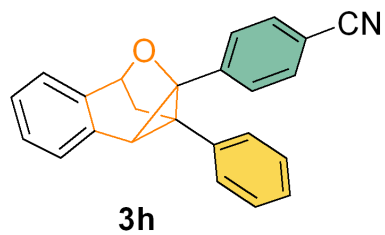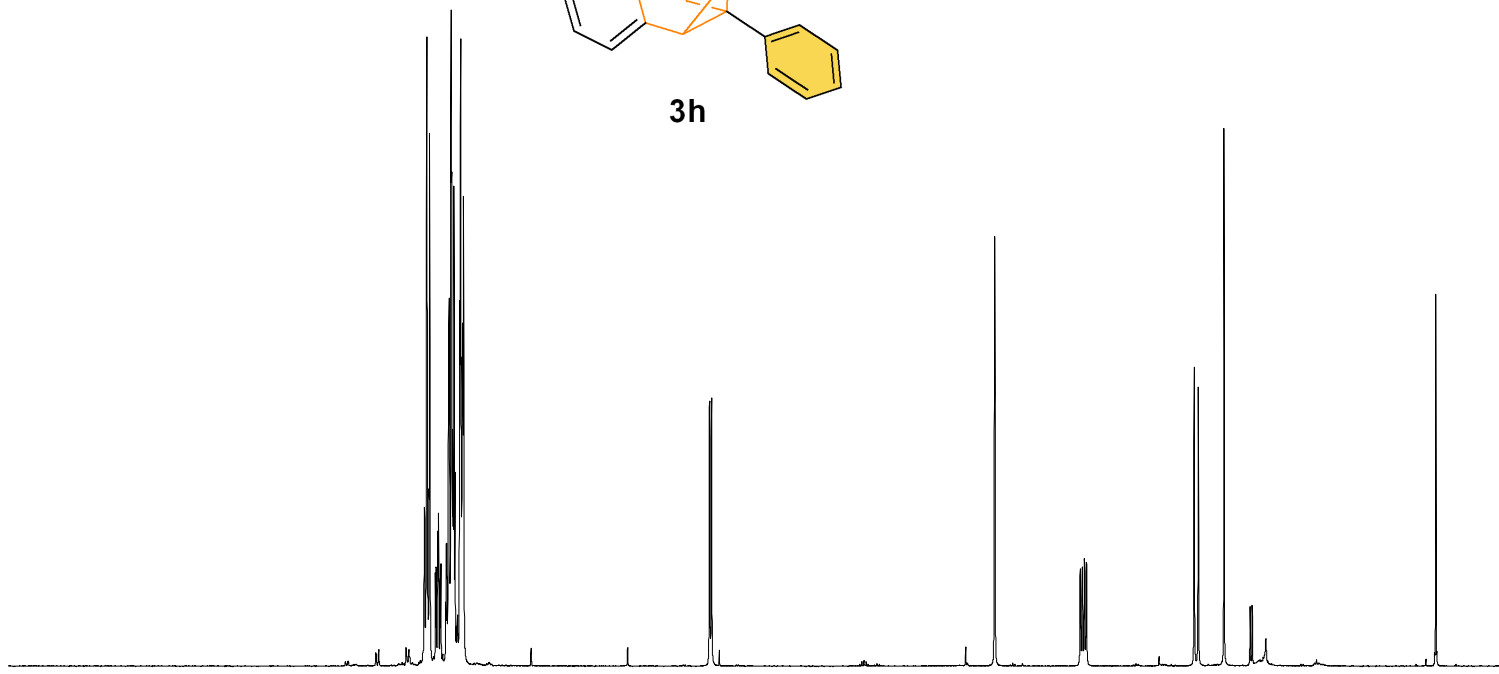

3.10  
1.02  
5.35  
3.97

1.00

1.00

1.00

0.99

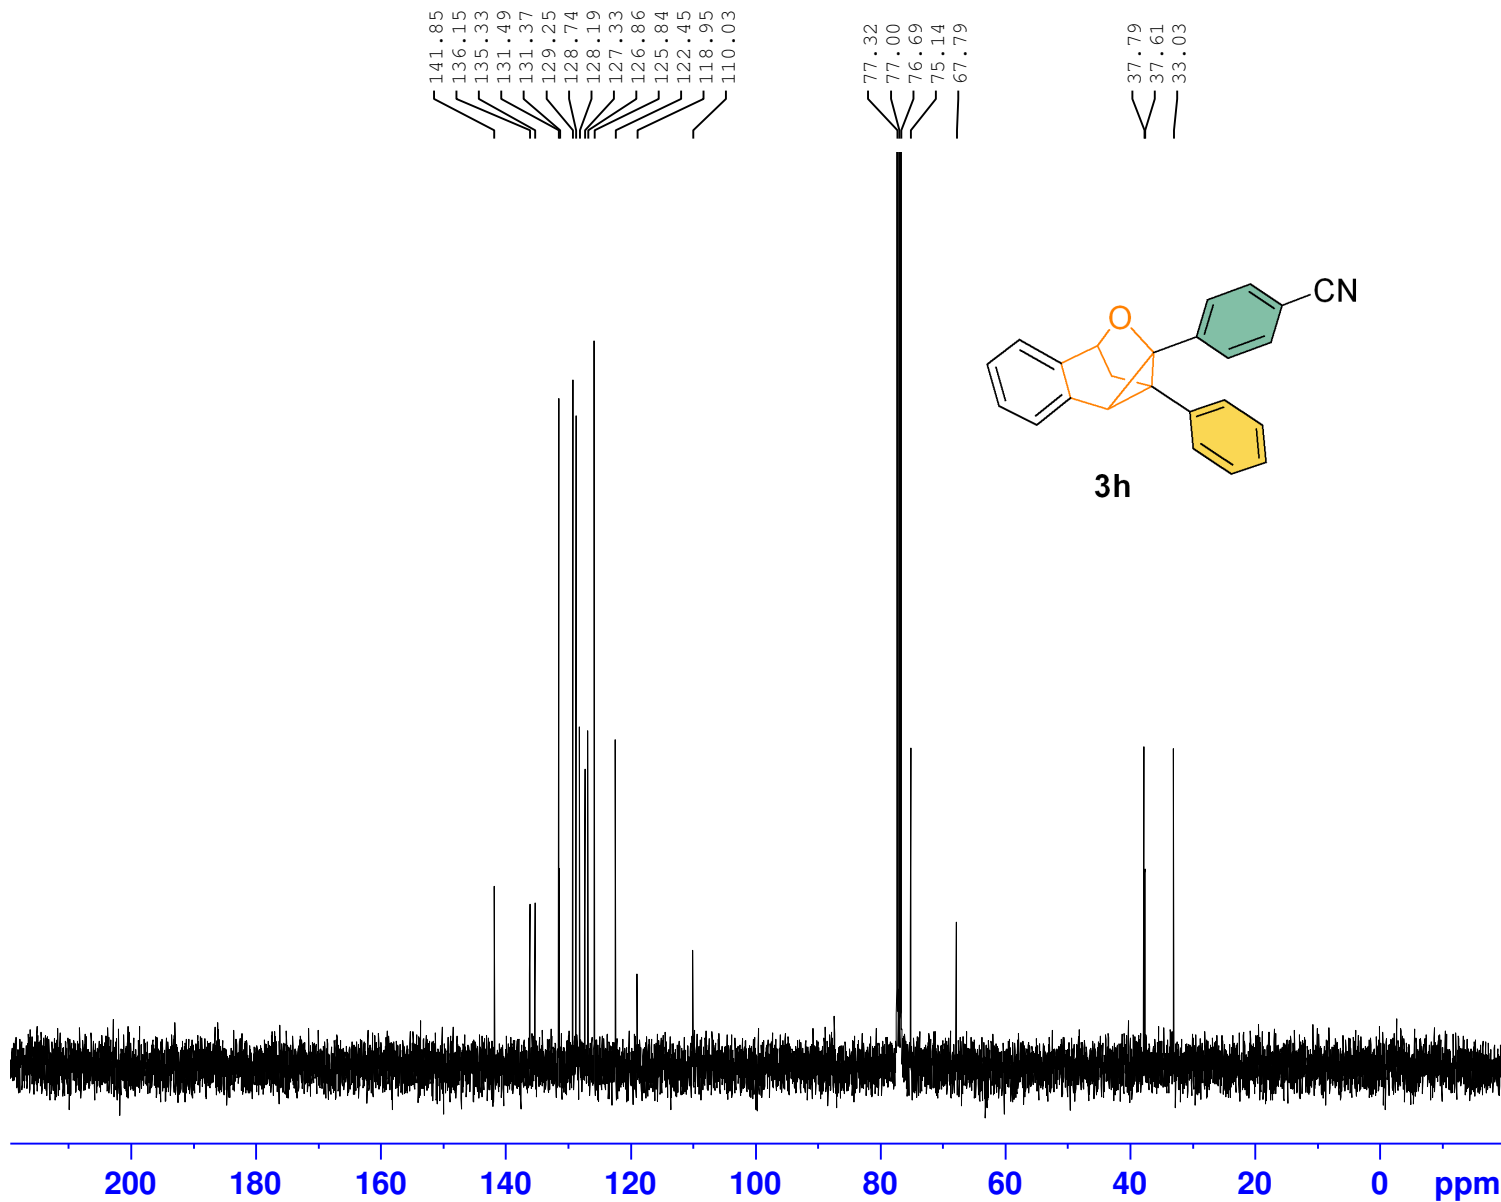

Current Data Parameters  
 NAME lsx-2-80-c-fr  
 EXPNO 1  
 PROCNO 1

F2 - Acquisition Parameters  
 Date\_ 20220713  
 Time 20.38  
 INSTRUM spect  
 PROBHD 5 mm PABBO BB/  
 PULPROG zgpg30  
 TD 65536  
 SOLVENT CDC13  
 NS 88  
 DS 2  
 SWH 24038.461 Hz  
 FIDRES 0.366798 Hz  
 AQ 1.3631488 sec  
 RG 196.92  
 DW 20.800 usec  
 DE 6.50 usec  
 TE 296.4 K  
 D1 2.00000000 sec  
 D11 0.03000000 sec  
 TD0 1

==== CHANNEL f1 =====  
 SFO1 100.6228298 MHz  
 NUC1 13C  
 P1 9.70 usec  
 PLW1 46.98899841 W

==== CHANNEL f2 =====  
 SFO2 400.1316005 MHz  
 NUC2 1H  
 CPDPRG[2] waltz16  
 PCPD2 90.00 usec  
 PLW2 11.99499989 W  
 PLW12 0.34213999 W  
 PLW13 0.27713001 W

F2 - Processing parameters  
 SI 32768  
 SF 100.6127729 MHz  
 WDW EM  
 SSB 0  
 LB 1.00 Hz  
 GB 0  
 PC 1.40

7.869  
7.867  
7.745  
7.731  
7.726  
7.721  
7.716  
7.702  
7.637  
7.615  
7.505  
7.487  
7.428  
7.416  
7.412  
7.402  
7.393  
7.389  
7.384  
7.375  
7.370  
7.365  
7.361  
7.356  
7.351  
7.343  
7.286  
7.277  
7.276  
7.268  
7.264  
7.262  
7.241  
7.229  
7.223  
7.216  
7.210  
7.202  
7.198  
7.194  
7.187  
7.182  
7.179  
7.175  
7.172  
7.169  
7.110  
7.106  
7.089  
7.084  
5.391  
5.376  
3.356  
2.719  
2.706  
2.704  
2.691  
2.690  
2.676  
2.674  
2.605  
1.804  
1.774  
1.534  
0.074  
0.000

Current Data Parameters  
NAME lsx-2-79-h-fr  
EXPNO 1  
PROCNO 1

F2 - Acquisition Parameters  
Date\_ 20220713  
Time 20.24  
INSTRUM spect  
PROBHD 5 mm PABBO BB/  
PULPROG zg30  
TD 65536  
SOLVENT CDCl3  
NS 6  
DS 2  
SWH 8012.820 Hz  
FIDRES 0.122266 Hz  
AQ 4.0894465 sec  
RG 112.31  
DW 62.400 usec  
DE 6.50 usec  
TE 295.6 K  
D1 1.00000000 sec  
TD0 1

==== CHANNEL f1 =====  
SFO1 400.1324710 MHz  
NUC1 1H  
P1 14.50 usec  
PLW1 11.99499989 W

F2 - Processing parameters  
SI 65536  
SF 400.1300179 MHz  
WDW EM  
SSB 0  
LB 0.30 Hz  
GB 0  
PC 1.00

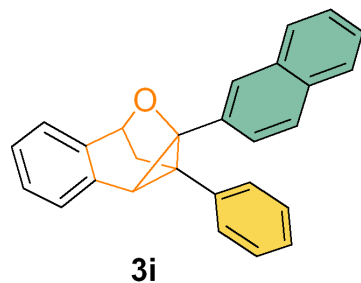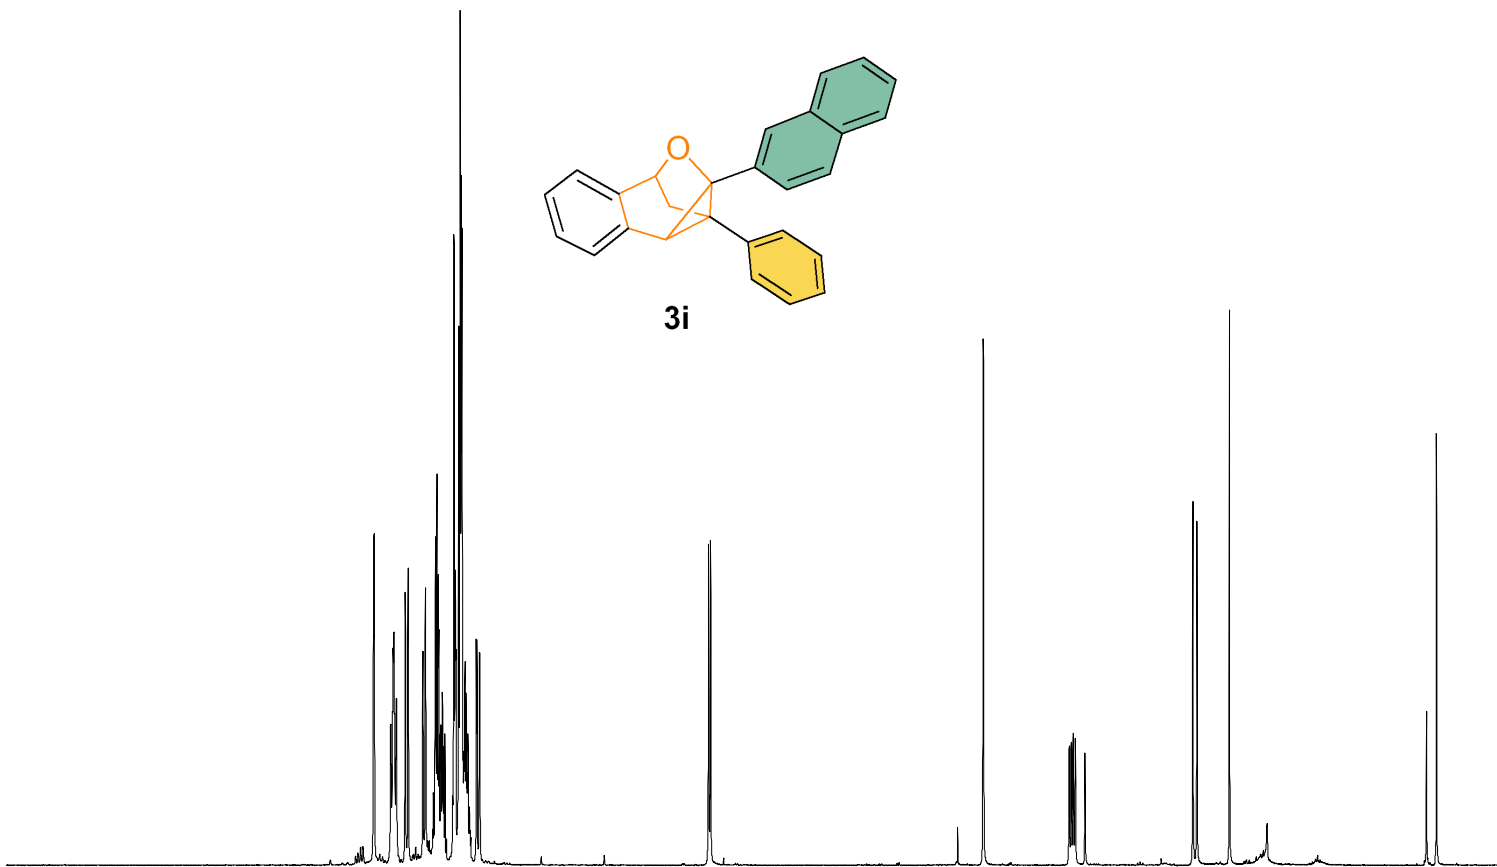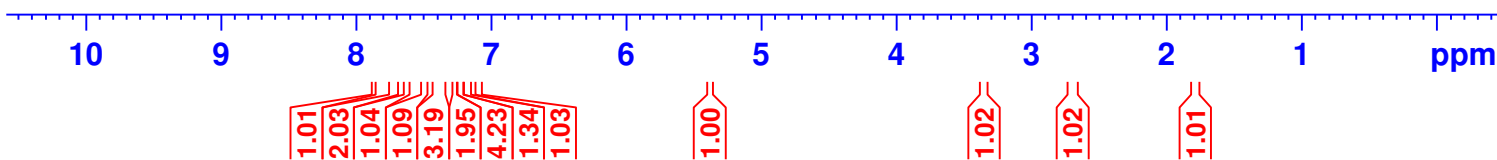



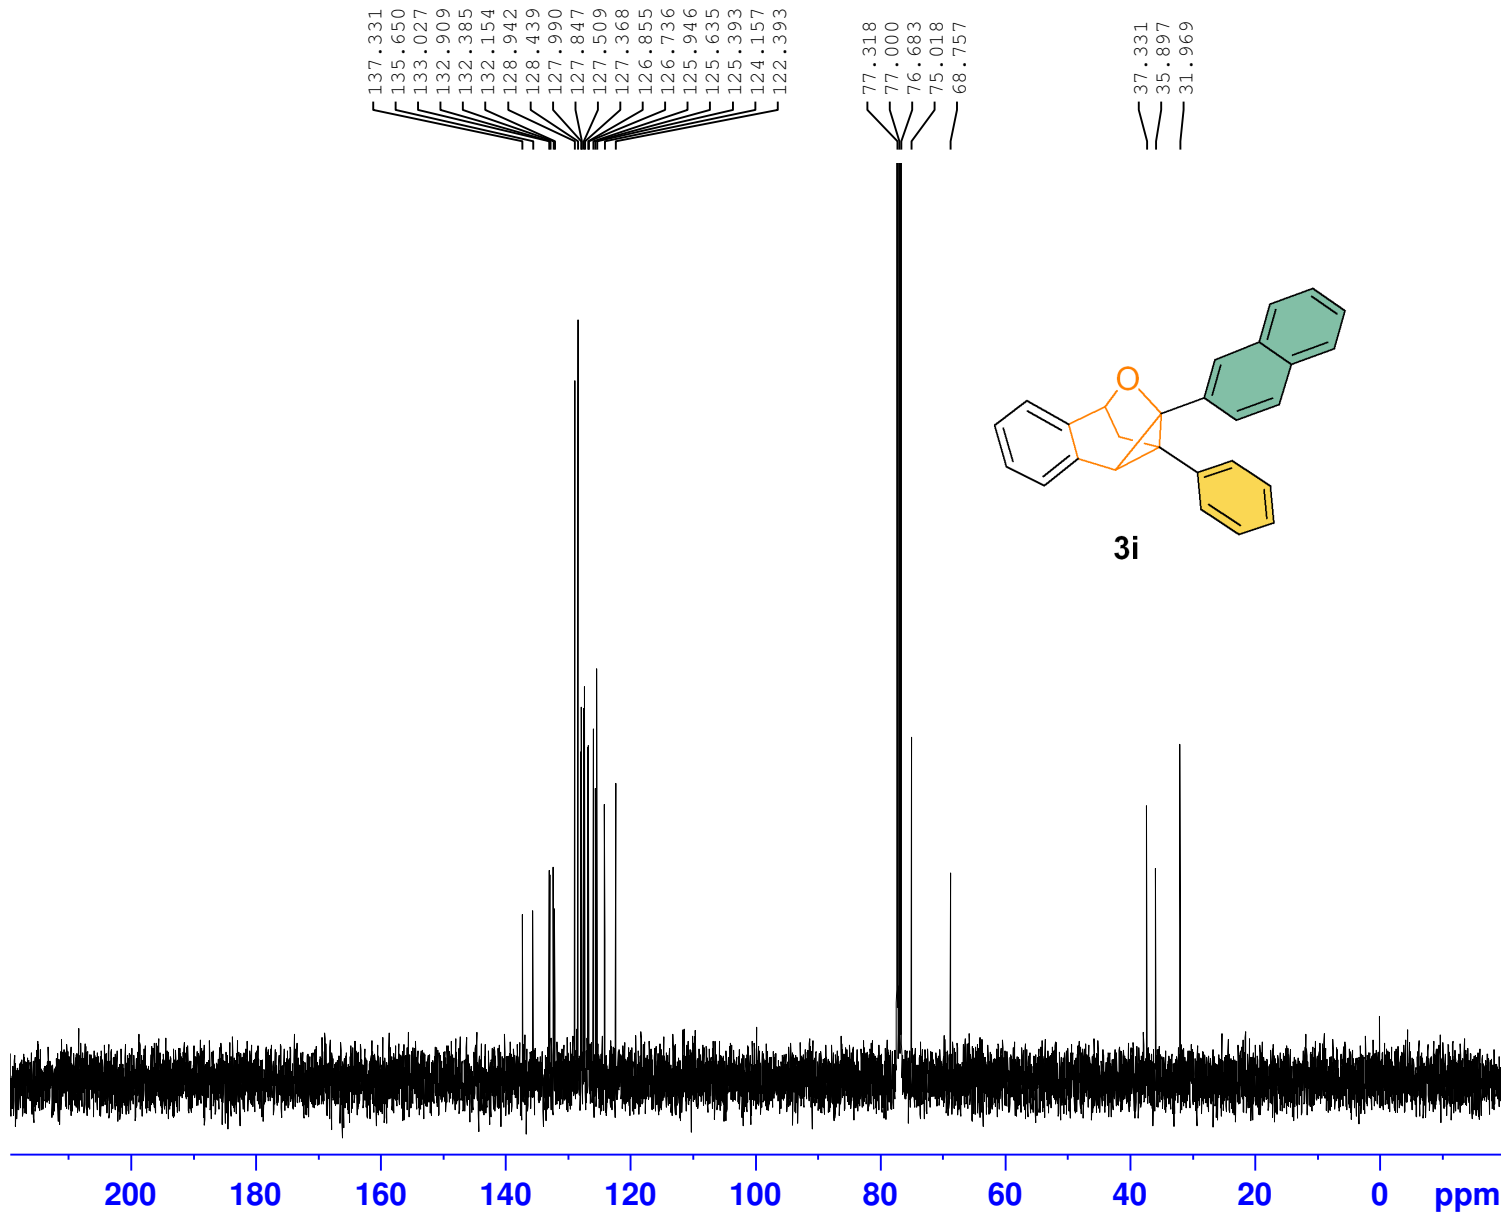

Current Data Parameters  
 NAME lsx-2-79-c-fr  
 EXPNO 1  
 PROCNO 1

F2 - Acquisition Parameters  
 Date\_ 20220713  
 Time 20.31  
 INSTRUM spect  
 PROBHD 5 mm PABBO BB/  
 PULPROG zgpg30  
 TD 65536  
 SOLVENT CDC13  
 NS 105  
 DS 2  
 SWH 24038.461 Hz  
 FIDRES 0.366798 Hz  
 AQ 1.3631488 sec  
 RG 196.92  
 DW 20.800 usec  
 DE 6.50 usec  
 TE 296.4 K  
 D1 2.00000000 sec  
 D11 0.03000000 sec  
 TD0 1

==== CHANNEL f1 =====  
 SFO1 100.6228298 MHz  
 NUC1 13C  
 P1 9.70 usec  
 PLW1 46.98899841 W

==== CHANNEL f2 =====  
 SFO2 400.1316005 MHz  
 NUC2 1H  
 CPDPRG[2] waltz16  
 PCPD2 90.00 usec  
 PLW2 11.99499989 W  
 PLW12 0.34213999 W  
 PLW13 0.27713001 W

F2 - Processing parameters  
 SI 32768  
 SF 100.6127736 MHz  
 WDW EM  
 SSB 0  
 LB 1.00 Hz  
 GB 0  
 PC 1.40

7.475  
7.456  
7.376  
7.372  
7.358  
7.354  
7.341  
7.336  
7.281  
7.270  
7.260  
7.244  
7.225  
7.213  
7.206  
7.203  
7.151  
7.138  
6.851  
6.842  
6.839  
6.830  
6.677  
6.671  
6.669  
5.316  
5.301

3.224  
2.708  
2.693  
2.678  
2.663

1.732  
1.703  
1.543

0.072  
0.000

Current Data Parameters  
NAME lsx-2-78-h-fr  
EXPNO 1  
PROCNO 1

F2 - Acquisition Parameters  
Date\_ 20220713  
Time 20.15  
INSTRUM spect  
PROBHD 5 mm PABBO BB/  
PULPROG zg30  
TD 65536  
SOLVENT CDC13  
NS 12  
DS 2  
SWH 8012.820 Hz  
FIDRES 0.122266 Hz  
AQ 4.0894465 sec  
RG 112.31  
DW 62.400 usec  
DE 6.50 usec  
TE 295.4 K  
D1 1.00000000 sec  
TD0 1

==== CHANNEL f1 =====  
SFO1 400.1324710 MHz  
NUC1 1H  
P1 14.50 usec  
PLW1 11.99499989 W

F2 - Processing parameters  
SI 65536  
SF 400.1300162 MHz  
WDW EM  
SSB 0  
LB 0.30 Hz  
GB 0  
PC 1.00

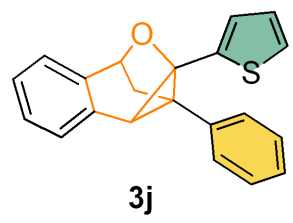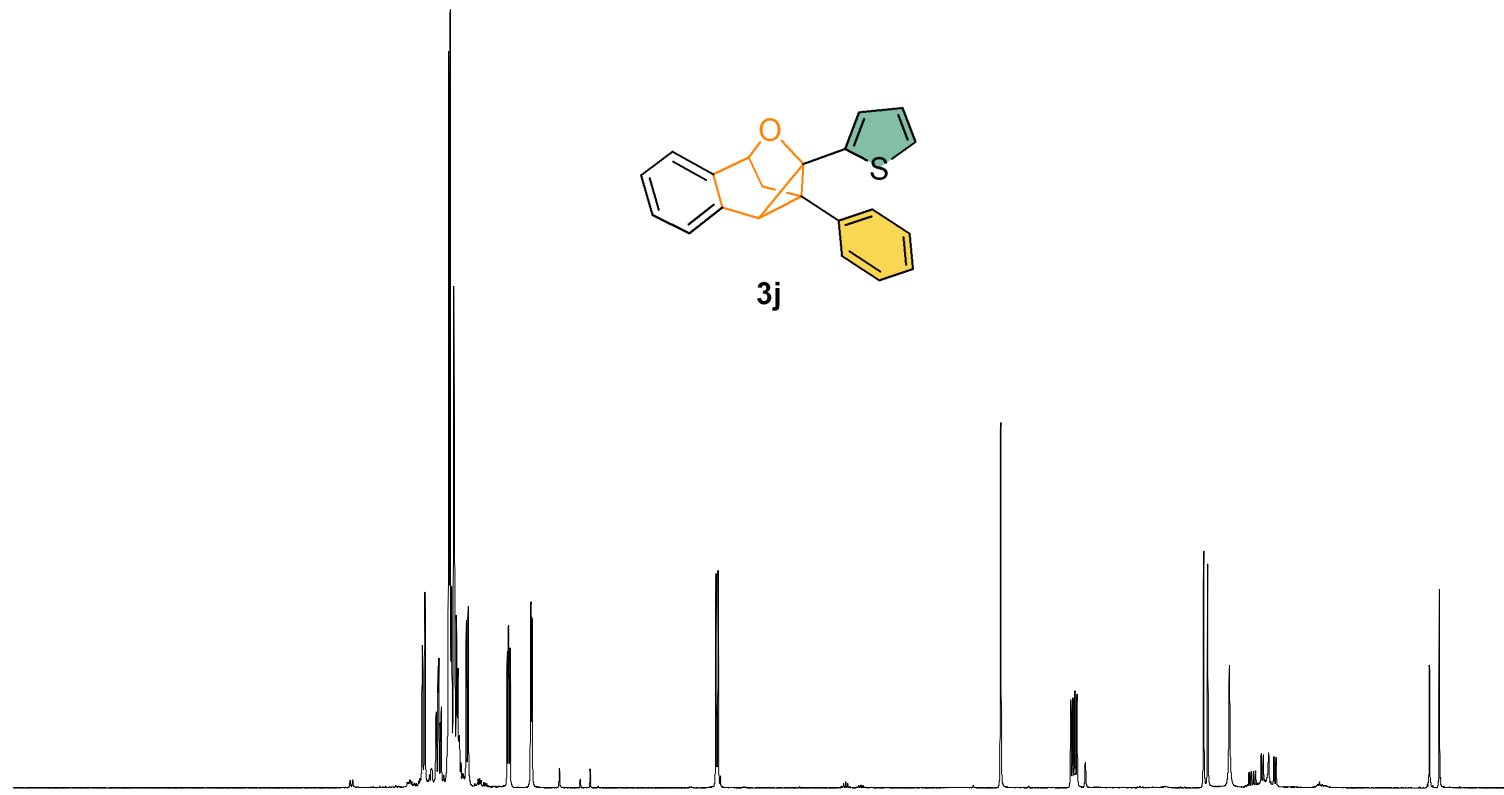

10 9 8 7 6 5 4 3 2 1 ppm

1.08  
1.08  
7.83  
0.99  
0.99  
1.01

1.00

1.00

1.02

1.03

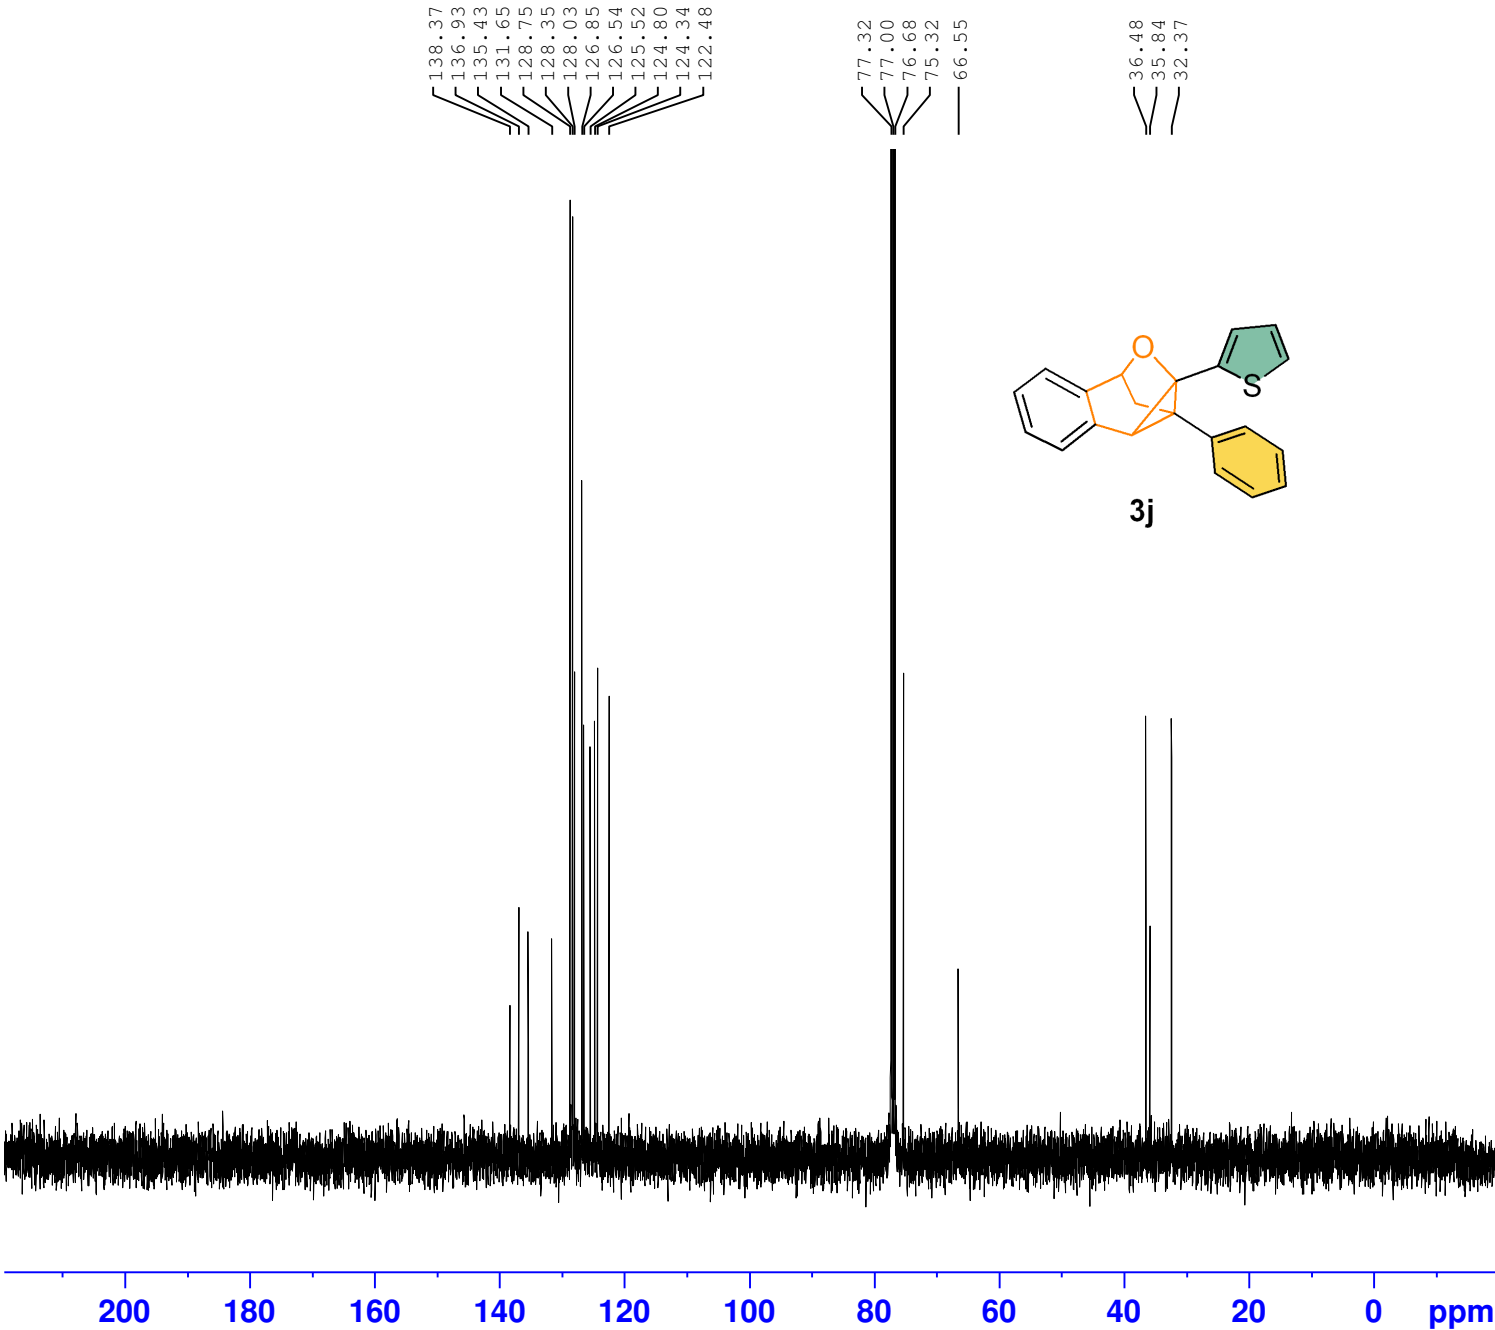

Current Data Parameters  
 NAME lsx-2-78-c-fr  
 EXPNO 1  
 PROCNO 1

F2 - Acquisition Parameters  
 Date\_ 20220713  
 Time 20.21  
 INSTRUM spect  
 PROBHD 5 mm PABBO BB/  
 PULPROG zgpg30  
 TD 65536  
 SOLVENT CDC13  
 NS 103  
 DS 2  
 SWH 24038.461 Hz  
 FIDRES 0.366798 Hz  
 AQ 1.3631488 sec  
 RG 196.92  
 DW 20.800 usec  
 DE 6.50 usec  
 TE 296.4 K  
 D1 2.00000000 sec  
 D11 0.03000000 sec  
 TD0 1

==== CHANNEL f1 =====  
 SFO1 100.6228298 MHz  
 NUC1 13C  
 P1 9.70 usec  
 PLW1 46.98899841 W

==== CHANNEL f2 =====  
 SFO2 400.1316005 MHz  
 NUC2 1H  
 CPDPRG[2] waltz16  
 PCPD2 90.00 usec  
 PLW2 11.99499989 W  
 PLW12 0.34213999 W  
 PLW13 0.27713001 W

F2 - Processing parameters  
 SI 32768  
 SF 100.6127736 MHz  
 WDW EM  
 SSB 0  
 LB 1.00 Hz  
 GB 0  
 PC 1.40

7.505  
7.467  
7.463  
7.457  
7.448  
7.444  
7.439  
7.361  
7.356  
7.343  
7.338  
7.325  
7.320  
7.288  
7.285  
7.269  
7.266  
7.253  
7.251  
7.247  
7.235  
7.218  
7.201  
7.196  
7.186  
7.181  
7.177  
7.164  
7.158  
7.146  
7.142  
7.138  
7.133  
7.126  
6.979  
6.975  
6.970  
6.963  
6.959  
6.956  
5.322  
5.307  
3.167  
3.054  
3.038  
3.025  
3.010

1.792  
1.763

Current Data Parameters  
NAME lsx-p3-3e-h-fr  
EXPNO 1  
PROCNO 1

F2 - Acquisition Parameters  
Date\_ 20220726  
Time 14.30  
INSTRUM spect  
PROBHD 5 mm DUL 13C-1  
PULPROG zg30  
TD 65536  
SOLVENT CDCl3  
NS 16  
DS 0  
SWH 8223.685 Hz  
FIDRES 0.125483 Hz  
AQ 3.9845889 sec  
RG 287  
DW 60.800 usec  
DE 6.00 usec  
TE 292.9 K  
D1 1.00000000 sec  
TD0 1

===== CHANNEL f1 =====  
NUC1 1H  
P1 15.80 usec  
PL1 -1.00 dB  
PL1W 12.17476940 W  
SFO1 400.1324710 MHz

F2 - Processing parameters  
SI 32768  
SF 400.1300198 MHz  
WDW EM  
SSB 0  
LB 0.30 Hz  
GB 0  
PC 1.00

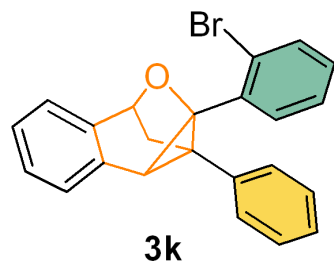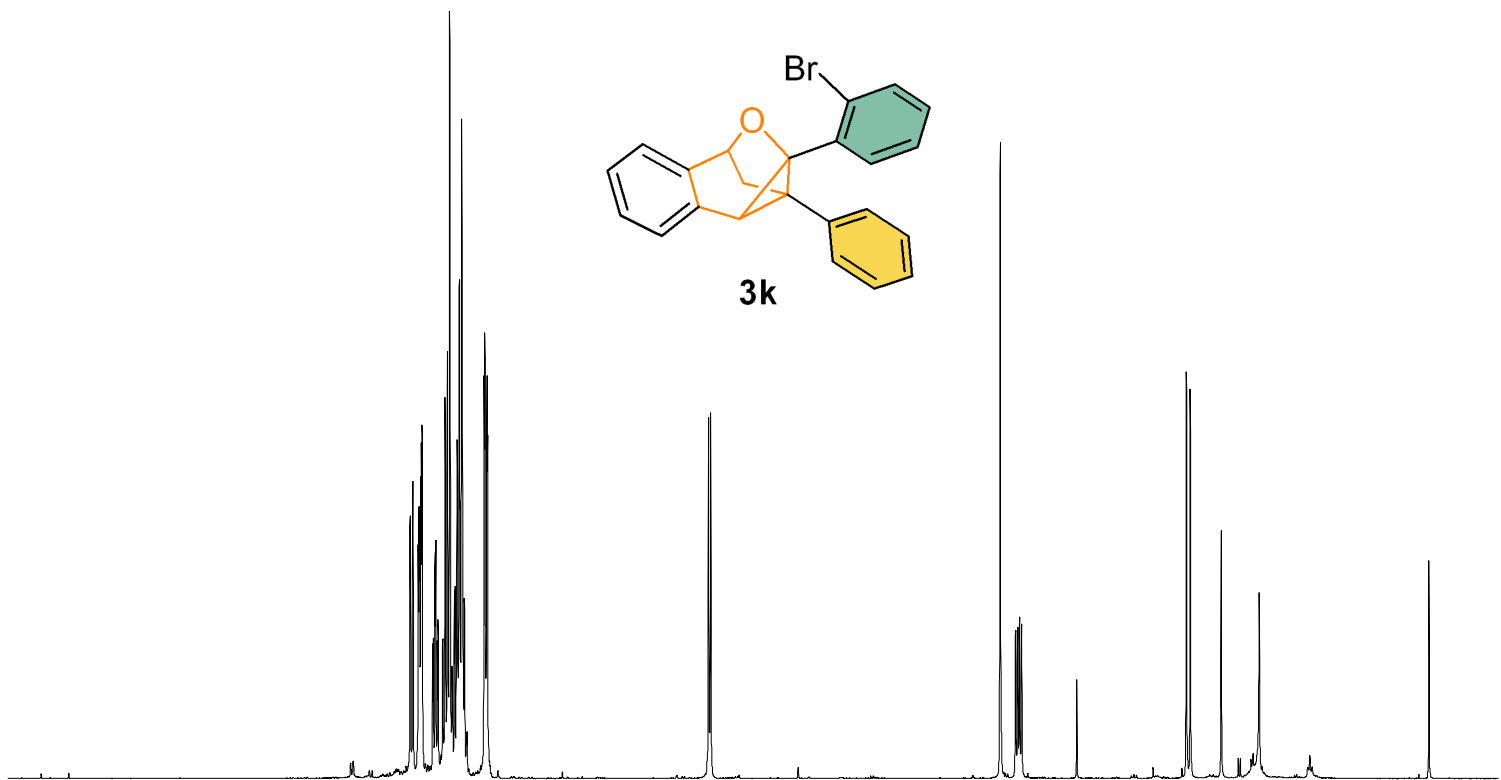

10 9 8 7 6 5 4 3 2 1 ppm

0.99  
2.10  
1.11  
7.35  
1.96

1.00

1.00  
0.96

0.99

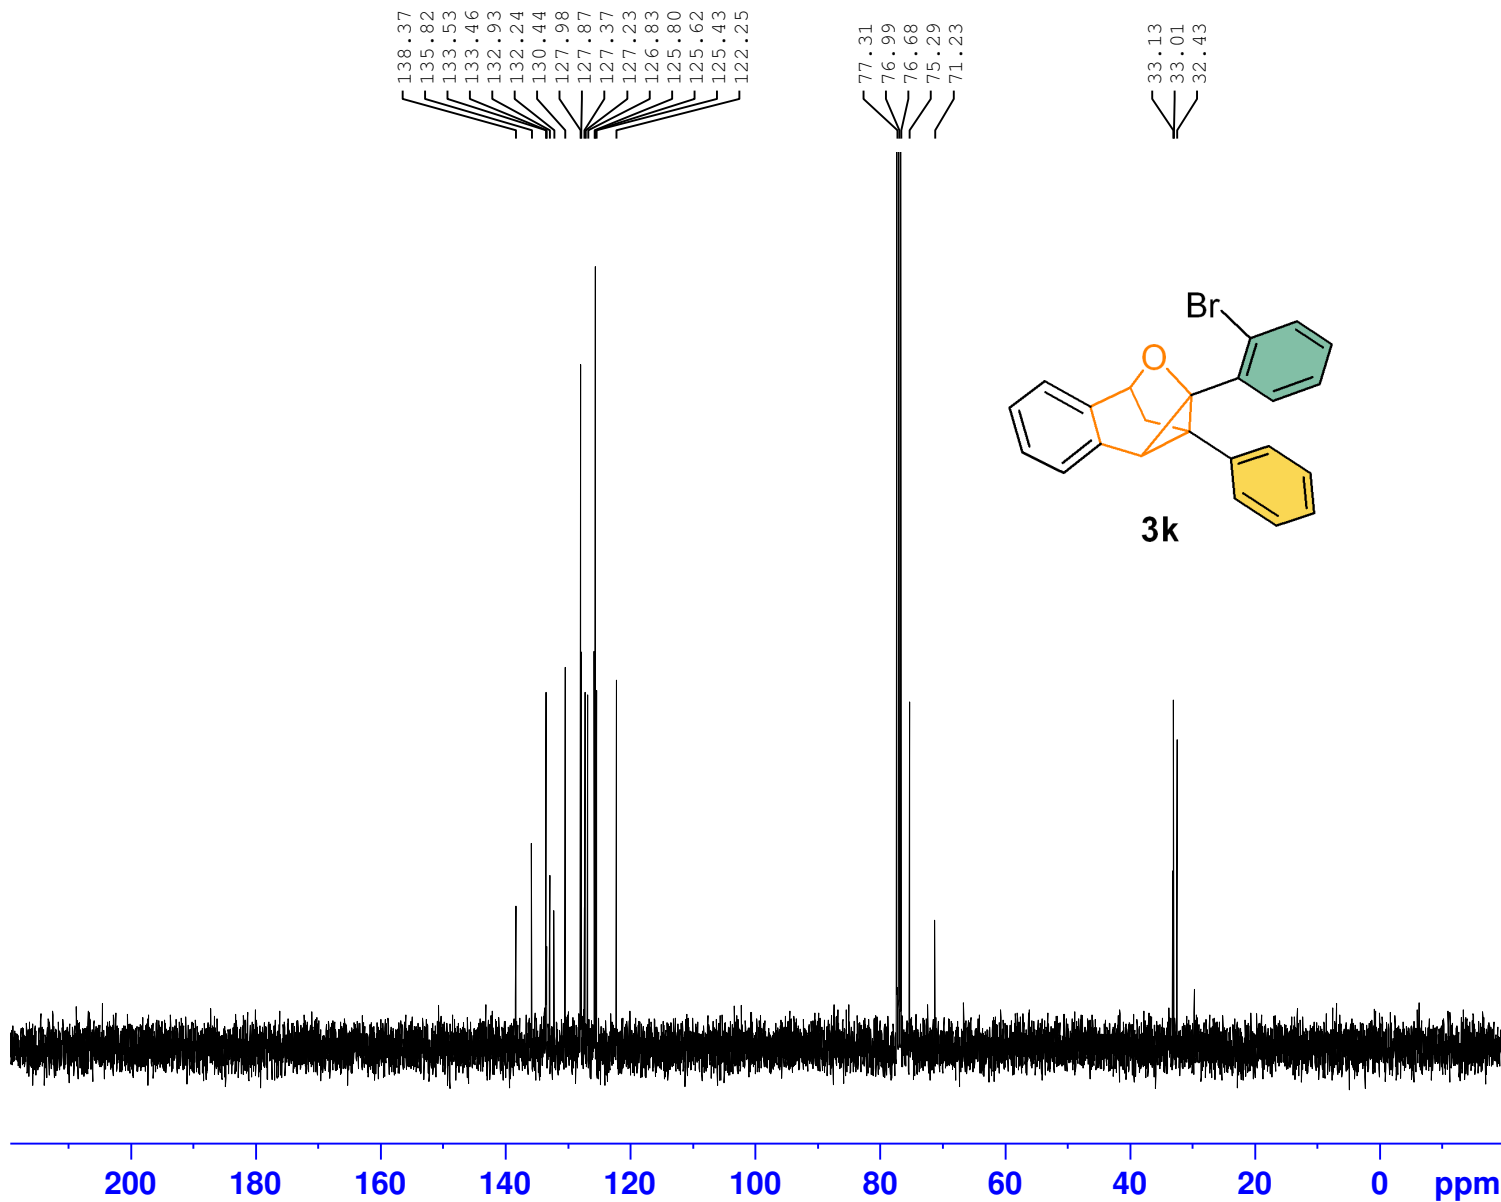

Current Data Parameters  
 NAME lsx-p3-3e-h-fr-C  
 EXPNO 1  
 PROCNO 1

F2 - Acquisition Parameters  
 Date\_ 20220726  
 Time 14.31  
 INSTRUM spect  
 PROBHD 5 mm DUL 13C-1  
 PULPROG zgpg30  
 TD 65536  
 SOLVENT CDCl3  
 NS 81  
 DS 0  
 SWH 24038.461 Hz  
 FIDRES 0.366798 Hz  
 AQ 1.3631488 sec  
 RG 2050  
 DW 20.800 usec  
 DE 6.00 usec  
 TE 293.0 K  
 D1 2.00000000 sec  
 D11 0.03000000 sec  
 TD0 1

===== CHANNEL f1 =====  
 NUC1 13C  
 P1 40.00 usec  
 PL1 -3.00 dB  
 PL1W 60.64365387 W  
 SFO1 100.6228298 MHz

===== CHANNEL f2 =====  
 CPDPRG[2] waltz16  
 NUC2 1H  
 PCPD2 80.00 usec  
 PL2 -1.00 dB  
 PL12 14.39 dB  
 PL13 18.00 dB  
 PL2W 12.17476940 W  
 PL12W 0.35193357 W  
 PL13W 0.15327126 W  
 SFO2 400.1316005 MHz

F2 - Processing parameters  
 SI 32768  
 SF 100.6127769 MHz  
 WDW EM  
 SSB 0  
 LB 1.00 Hz  
 GB 0  
 PC 1.40

7.435  
7.362  
7.355  
7.346  
7.343  
7.340  
7.337  
7.328  
7.321  
7.269  
7.267  
7.249  
7.241  
7.235  
7.234  
7.223  
7.166  
7.158  
7.153  
7.148  
7.142  
7.136  
7.129  
7.126  
7.118  
7.112  
6.941  
6.935  
6.924  
6.919  
6.914  
6.902  
6.897  
6.785  
6.778  
6.773  
6.761  
6.756  
6.748  
5.291  
5.276  
3.750  
3.122  
2.626  
2.625  
2.611  
2.610  
2.597  
2.595  
2.582  
1.718  
1.689  
1.552  
0.000

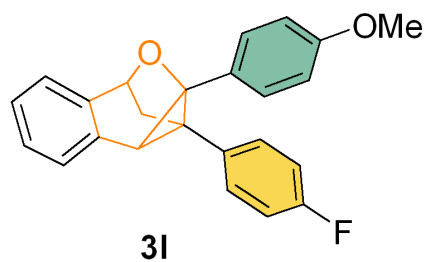

Current Data Parameters  
NAME lsx-2-32-h-fr  
EXPNO 1  
PROCNO 1

F2 - Acquisition Parameters  
Date\_ 20220712  
Time 16.43  
INSTRUM spect  
PROBHD 5 mm PABBO BB/  
PULPROG zg30  
TD 65536  
SOLVENT CDC13  
NS 16  
DS 2  
SWH 8012.820 Hz  
FIDRES 0.122266 Hz  
AQ 4.0894465 sec  
RG 103.52  
DW 62.400 usec  
DE 6.50 usec  
TE 295.4 K  
D1 1.00000000 sec  
TD0 1

==== CHANNEL f1 =====  
SFO1 400.1324710 MHz  
NUC1 1H  
P1 14.50 usec  
PLW1 11.99499989 W

F2 - Processing parameters  
SI 65536  
SF 400.1300146 MHz  
WDW EM  
SSB 0  
LB 0.30 Hz  
GB 0  
PC 1.00

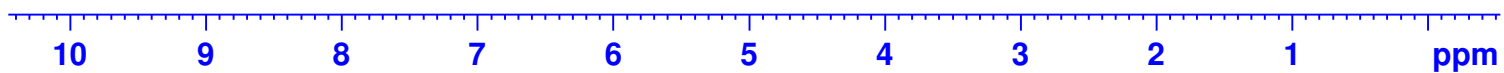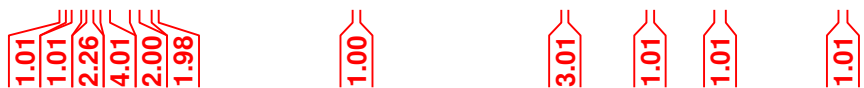

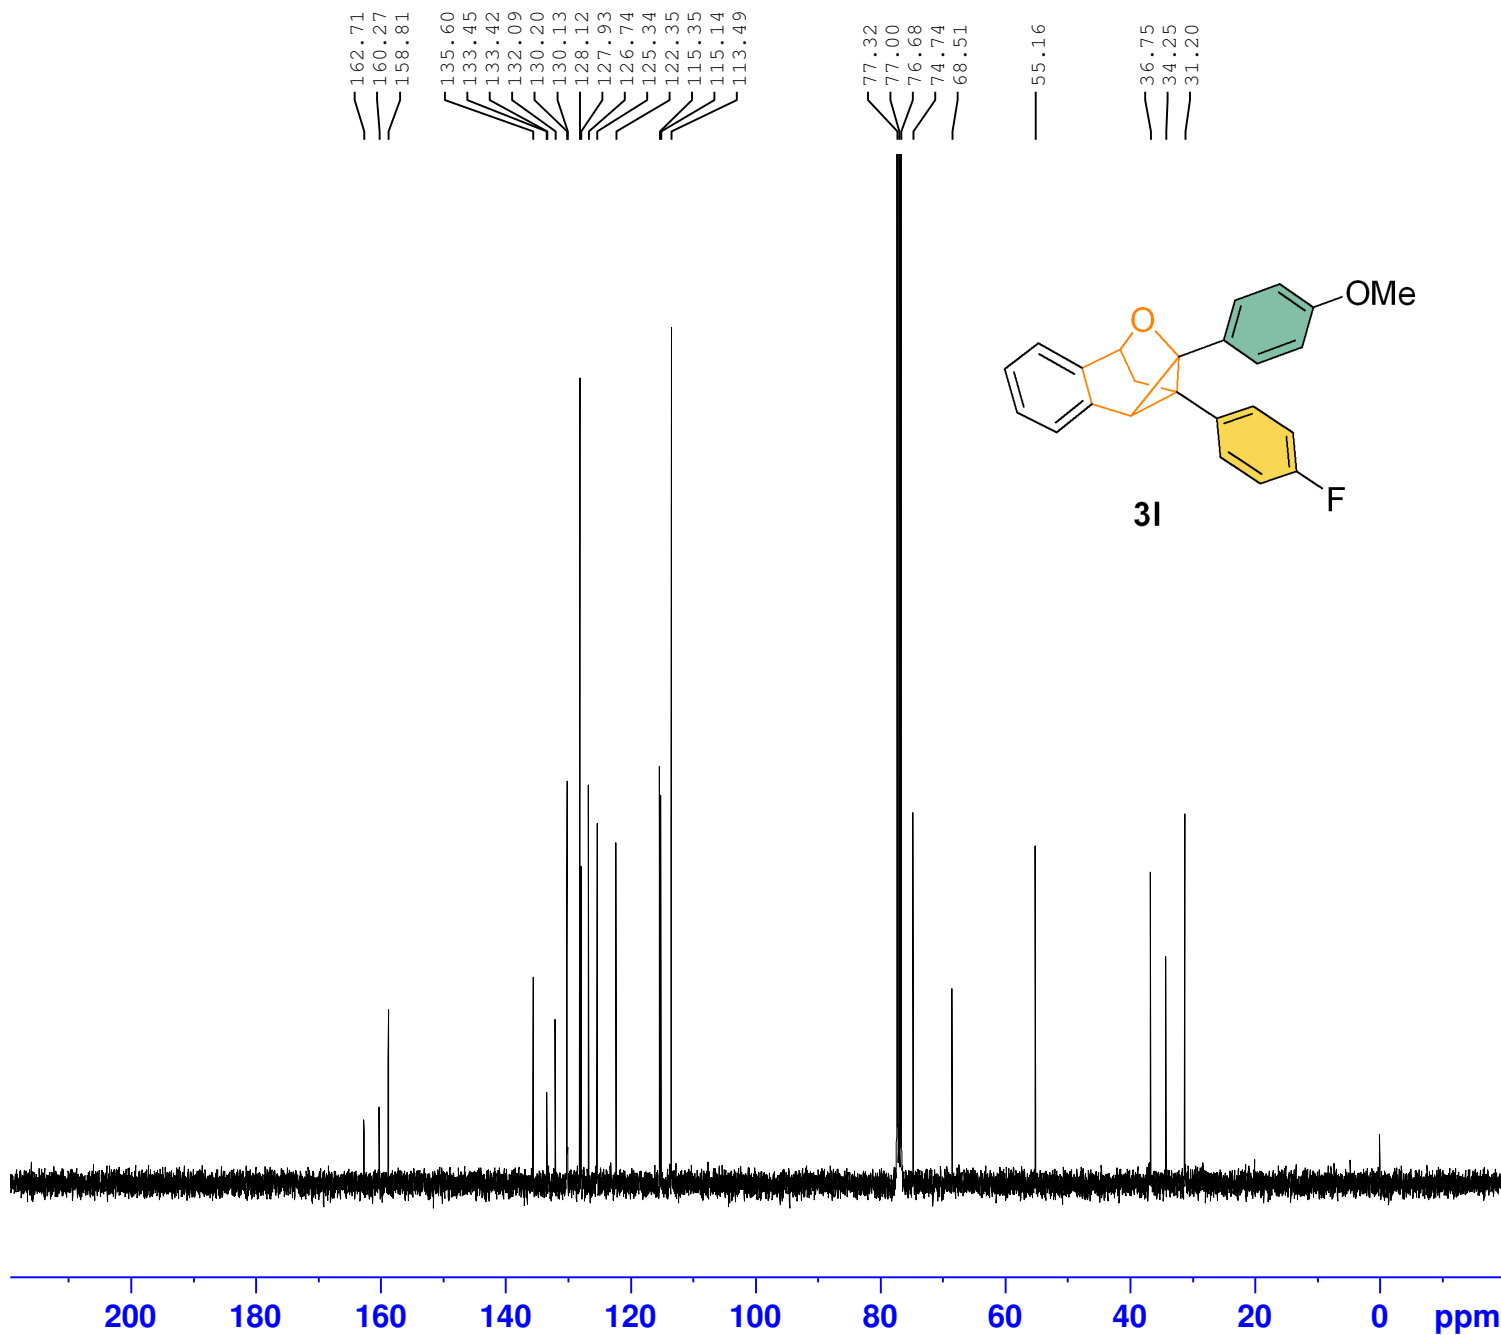

Current Data Parameters  
 NAME lsx-2-32-c-fr  
 EXPNO 1  
 PROCNO 1

F2 - Acquisition Parameters  
 Date\_ 20220712  
 Time 16.59  
 INSTRUM spect  
 PROBHD 5 mm PABBO BB/  
 PULPROG zgpg30  
 TD 65536  
 SOLVENT CDC13  
 NS 268  
 DS 2  
 SWH 24038.461 Hz  
 FIDRES 0.366798 Hz  
 AQ 1.3631488 sec  
 RG 196.92  
 DW 20.800 usec  
 DE 6.50 usec  
 TE 296.5 K  
 D1 2.00000000 sec  
 D11 0.03000000 sec  
 TD0 1

==== CHANNEL f1 =====  
 SFO1 100.6228298 MHz  
 NUC1 13C  
 P1 9.70 usec  
 PLW1 46.98899841 W

==== CHANNEL f2 =====  
 SFO2 400.1316005 MHz  
 NUC2 1H  
 CPDPRG[2] waltz16  
 PCPD2 90.00 usec  
 PLW2 11.99499989 W  
 PLW12 0.34213999 W  
 PLW13 0.27713001 W

F2 - Processing parameters  
 SI 32768  
 SF 100.6127729 MHz  
 WDW EM  
 SSB 0  
 LB 1.00 Hz  
 GB 0  
 PC 1.40

7.642  
7.501  
7.483  
7.433  
7.429  
7.416  
7.411  
7.407  
7.400  
7.392  
7.388  
7.384  
7.371  
7.365  
7.356  
7.351  
7.346  
7.343  
7.337  
7.333  
7.324  
7.266  
7.264  
7.245  
7.241  
7.234  
7.232  
7.223  
7.219  
7.215  
7.211  
7.202  
7.197  
7.162  
7.154  
7.150  
7.140  
7.122  
7.110  
7.106  
5.341  
5.326  
3.342  
2.730  
2.715  
2.700  
2.685  
2.671  
1.769  
1.739

Current Data Parameters  
 NAME lsx-project3-3m-h-fr  
 EXPNO 1  
 PROCNO 1

F2 - Acquisition Parameters  
 Date\_ 20220723  
 Time 14.19  
 INSTRUM spect  
 PROBHD 5 mm PABBO BB/  
 PULPROG zg30  
 TD 65536  
 SOLVENT CDC13  
 NS 16  
 DS 2  
 SWH 8012.820 Hz  
 FIDRES 0.122266 Hz  
 AQ 4.0894465 sec  
 RG 39.46  
 DW 62.400 usec  
 DE 6.50 usec  
 TE 295.4 K  
 D1 1.00000000 sec  
 TD0 1

==== CHANNEL f1 =====  
 SFO1 400.1324710 MHz  
 NUC1 1H  
 P1 14.50 usec  
 PLW1 11.99499989 W

F2 - Processing parameters  
 SI 65536  
 SF 400.1300537 MHz  
 WDW EM  
 SSB 0  
 LB 0.30 Hz  
 GB 0  
 PC 1.00

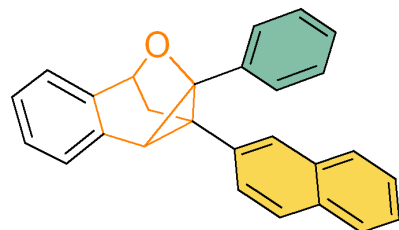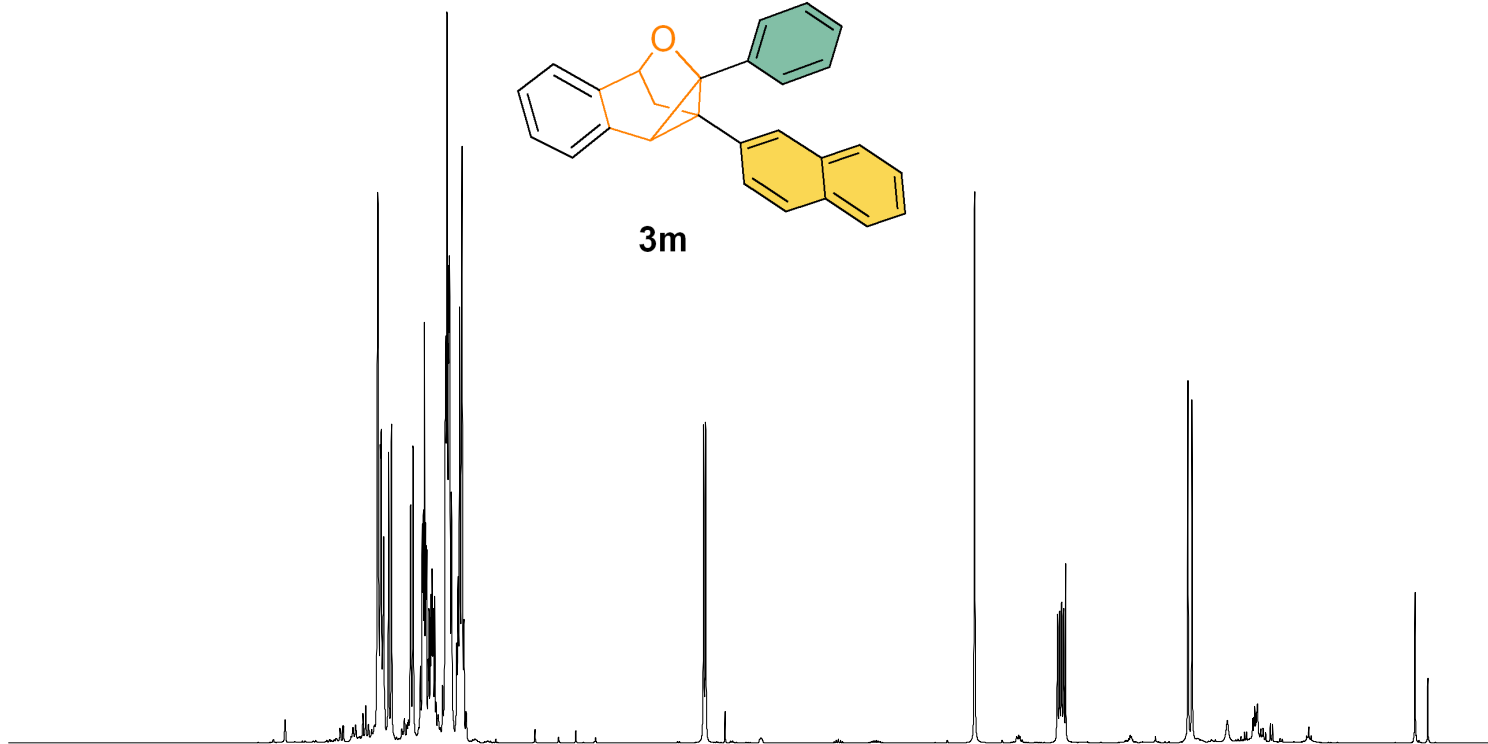

10 9 8 7 6 5 4 3 2 1 ppm

3.98  
1.12  
3.33  
4.88  
3.05  
1.00  
1.00  
1.22  
1.05



135.64  
135.28  
135.00  
133.34  
132.24  
132.12  
127.98  
127.93  
127.87  
127.59  
127.47  
126.97  
126.88  
126.82  
126.16  
126.04  
125.65  
125.35  
122.34

77.31  
77.00  
76.68  
74.90  
68.60

37.25  
35.97  
31.89

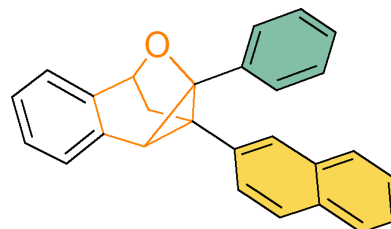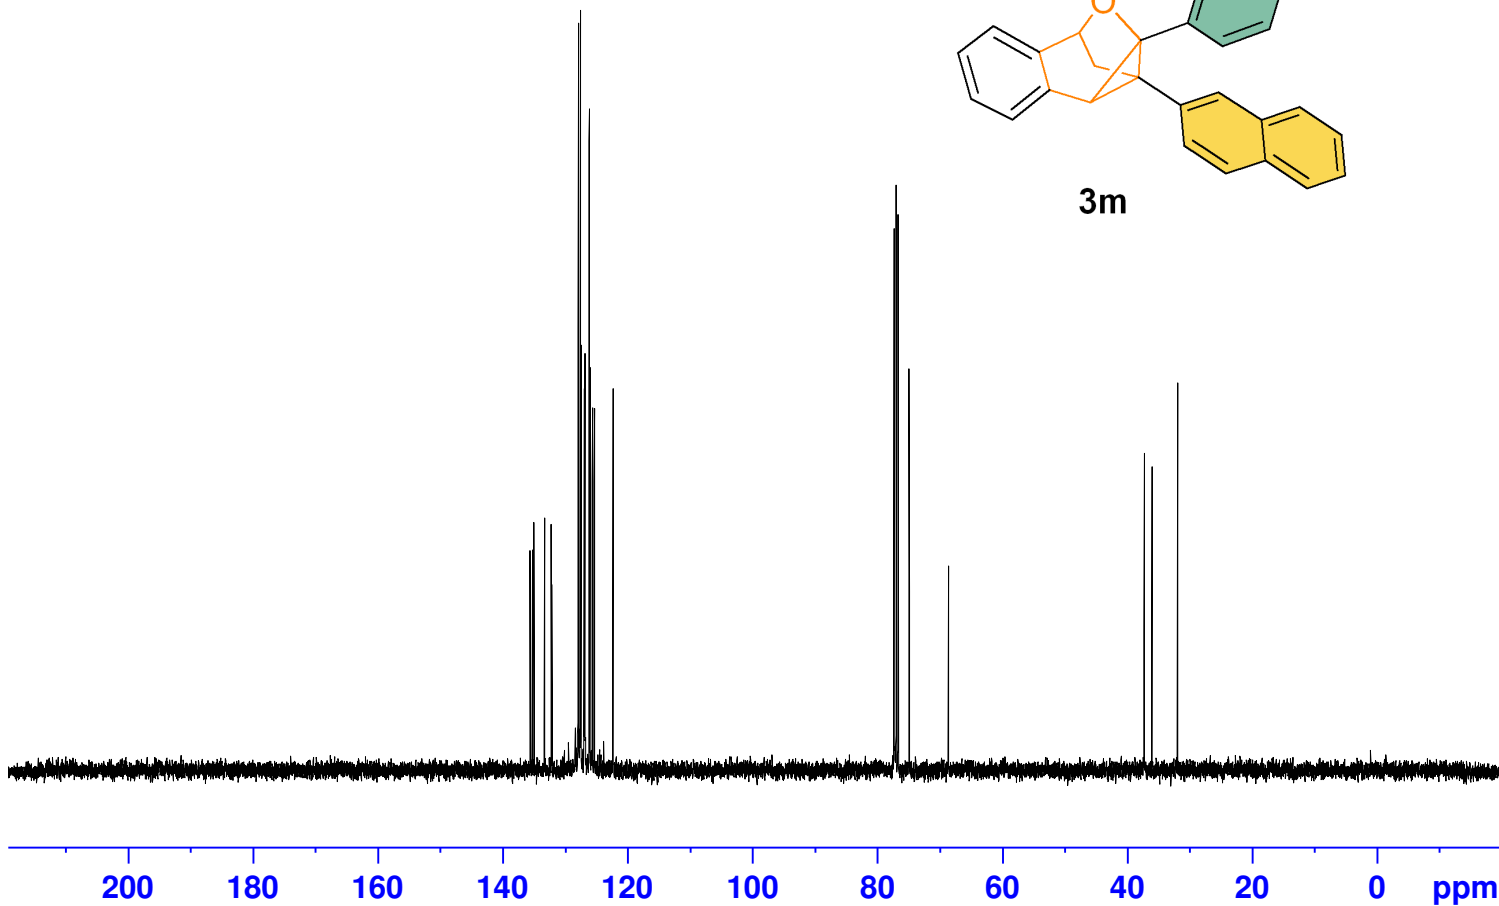

Current Data Parameters  
NAME lsx-project3-3m-c-fr  
EXPNO 1  
PROCNO 1

F2 - Acquisition Parameters  
Date\_ 20220723  
Time 14.22  
INSTRUM spect  
PROBHD 5 mm PABBO BB/  
PULPROG zgpg30  
TD 65536  
SOLVENT CDC13  
NS 46  
DS 2  
SWH 24038.461 Hz  
FIDRES 0.366798 Hz  
AQ 1.3631488 sec  
RG 196.92  
DW 20.800 usec  
DE 6.50 usec  
TE 296.2 K  
D1 2.0000000 sec  
D11 0.03000000 sec  
TD0 1

==== CHANNEL f1 =====  
SFO1 100.6228298 MHz  
NUC1 13C  
P1 9.70 usec  
PLW1 46.98899841 W

==== CHANNEL f2 =====  
SFO2 400.1316005 MHz  
NUC2 1H  
CPDPRG[2] waltz16  
PCPD2 90.00 usec  
PLW2 11.99499989 W  
PLW12 0.34213999 W  
PLW13 0.27713001 W

F2 - Processing parameters  
SI 32768  
SF 100.6127872 MHz  
WDW EM  
SSB 0  
LB 1.00 Hz  
GB 0  
PC 1.40

7.398  
7.391  
7.386  
7.381  
7.369  
7.366  
7.360  
7.354  
7.342  
7.338  
7.326  
7.322  
7.308  
7.304  
7.290  
7.285  
7.263  
7.259  
7.255  
7.247  
7.242  
7.225  
7.216  
7.213  
7.198  
7.195  
7.180  
7.177  
7.173  
7.169  
7.154  
5.127  
5.112  
2.606  
2.543  
2.541  
2.528  
2.526  
2.514  
2.512  
2.498  
2.497  
1.992  
1.970  
1.528  
1.508  
1.499  
1.486  
1.452  
1.439  
1.422  
1.415  
1.409  
1.402  
1.396  
1.391  
1.381  
1.378  
1.375  
1.231  
1.213  
1.194  
1.176  
0.801  
0.783  
0.764

Current Data Parameters  
 NAME lsx-project3-3k-h-fr  
 EXPNO 1  
 PROCNO 1

F2 - Acquisition Parameters  
 Date\_ 20220725  
 Time 20.53  
 INSTRUM spect  
 PROBHD 5 mm DUL 13C-1  
 PULPROG zg30  
 TD 65536  
 SOLVENT CDC13  
 NS 16  
 DS 2  
 SWH 8223.685 Hz  
 FIDRES 0.125483 Hz  
 AQ 3.9845889 sec  
 RG 144  
 DW 60.800 usec  
 DE 6.00 usec  
 TE 292.7 K  
 D1 1.00000000 sec  
 TD0 1

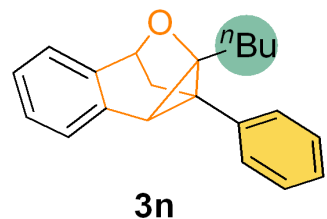

==== CHANNEL f1 =====  
 NUC1 1H  
 P1 15.80 usec  
 PL1 -1.00 dB  
 PL1W 12.17476940 W  
 SFO1 400.1324710 MHz

F2 - Processing parameters  
 SI 32768  
 SF 400.1300236 MHz  
 WDW EM  
 SSB 0  
 LB 0.30 Hz  
 GB 0  
 PC 1.00

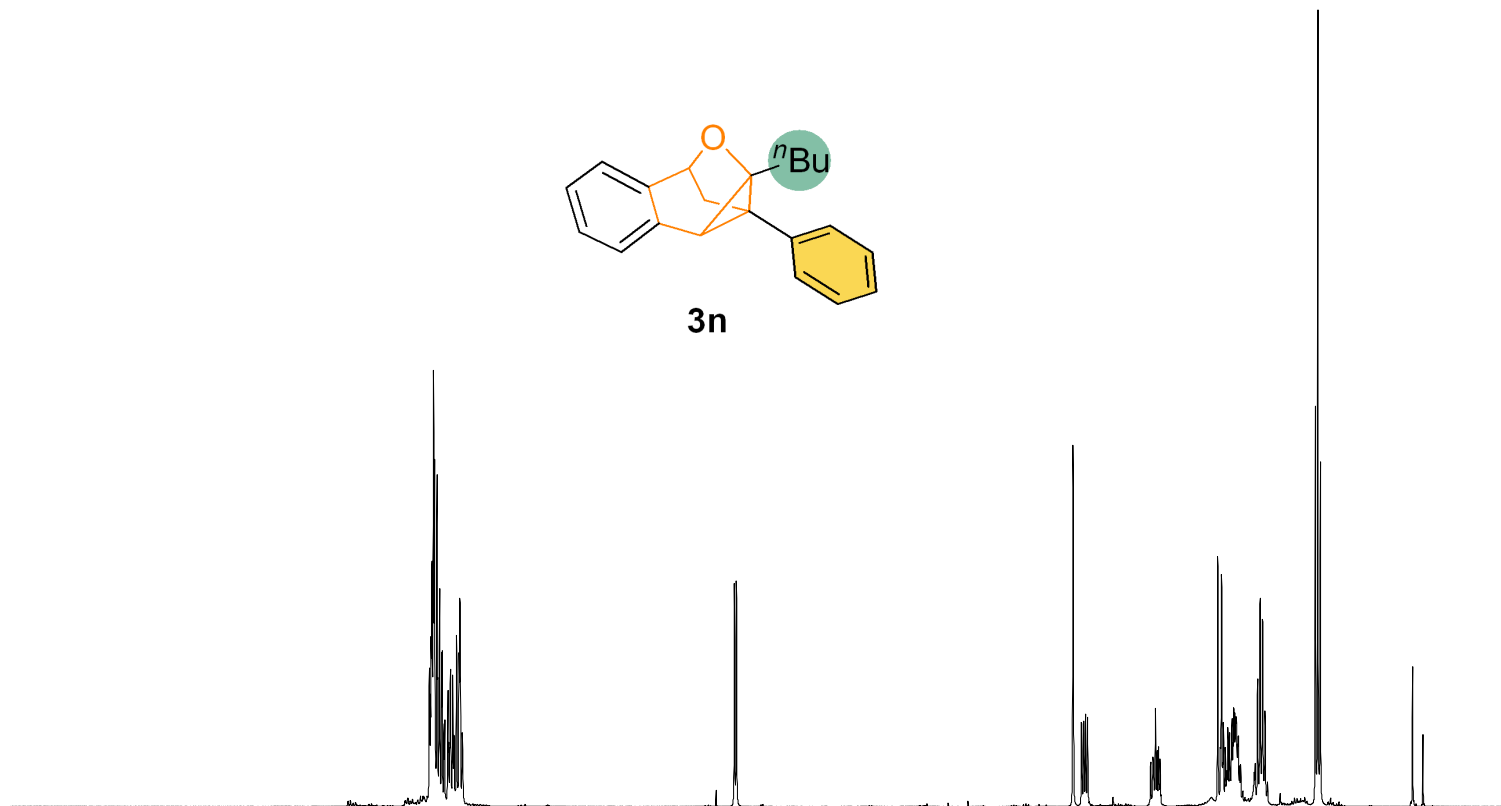

6.25  
3.31

1.00

1.07  
1.02

1.02

4.27  
2.32

3.04

138.55  
135.37  
132.97  
128.48  
128.45  
127.68  
126.47  
126.42  
124.77  
122.18

77.32  
77.00  
76.68  
74.71  
67.52

36.26  
32.15  
28.99  
28.52  
28.47  
22.55  
13.93

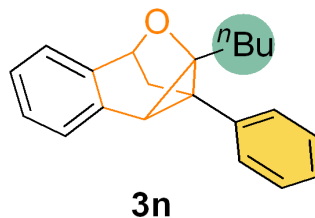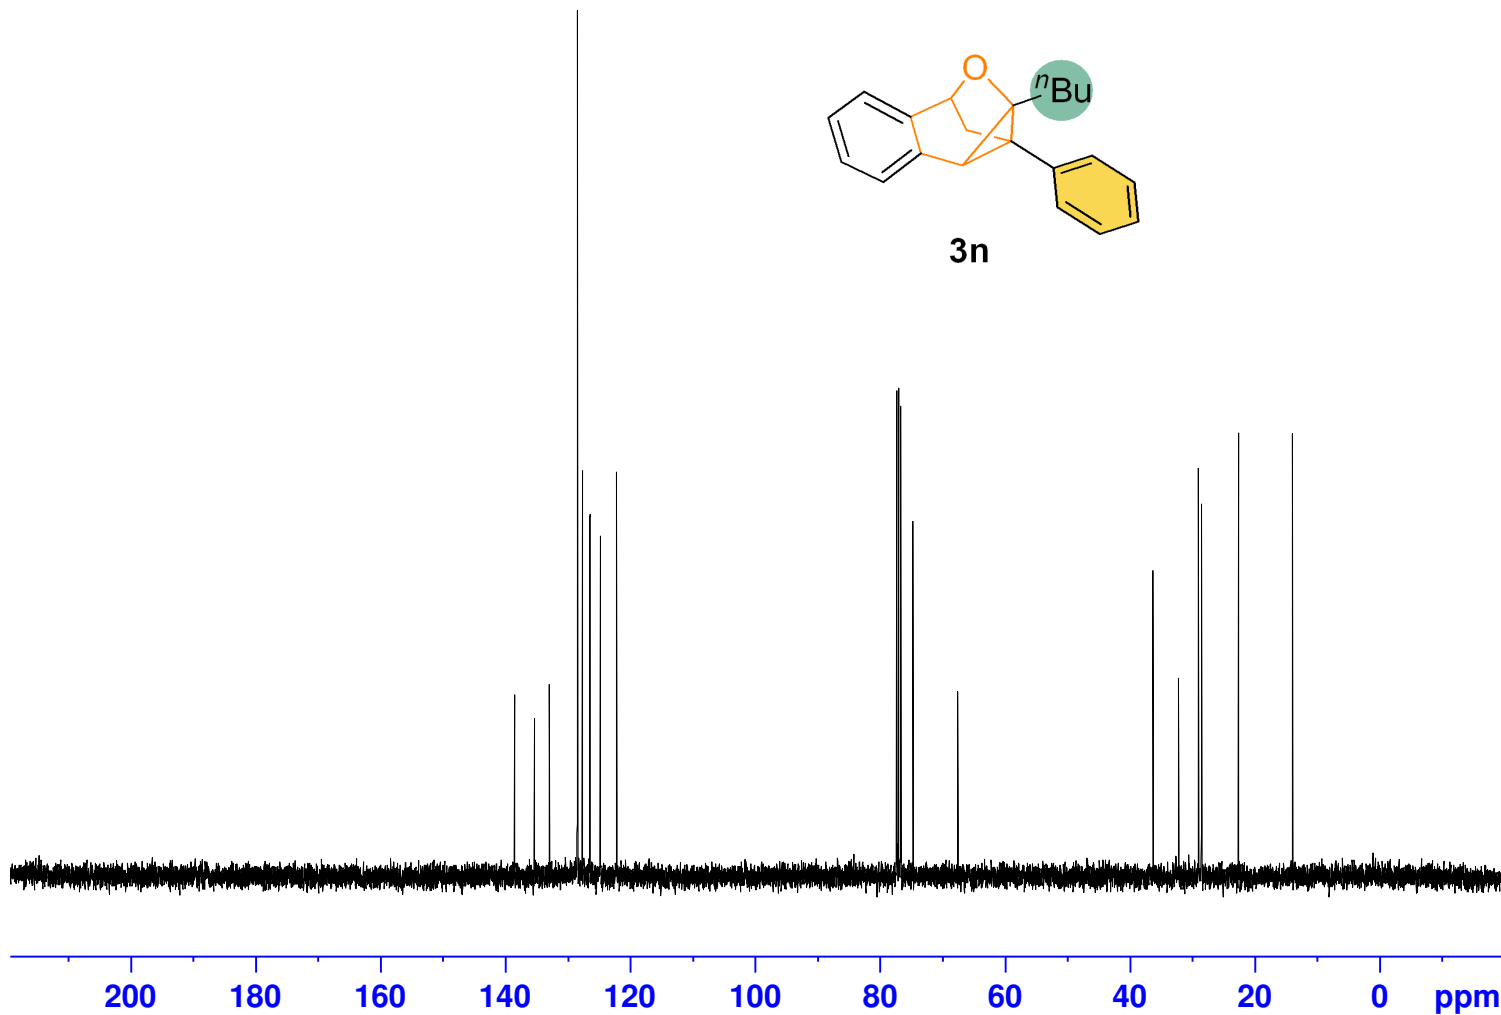

Current Data Parameters  
NAME lsx-project3-3k-c-fr  
EXPNO 1  
PROCNO 1

F2 - Acquisition Parameters  
Date\_ 20220725  
Time 21.01  
INSTRUM spect  
PROBHD 5 mm DUL 13C-1  
PULPROG zgpg30  
TD 65536  
SOLVENT CDCl3  
NS 126  
DS 1  
SWH 24038.461 Hz  
FIDRES 0.366798 Hz  
AQ 1.3631488 sec  
RG 2050  
DW 20.800 usec  
DE 6.00 usec  
TE 293.1 K  
D1 2.00000000 sec  
D11 0.03000000 sec  
TD0 1

==== CHANNEL f1 =====  
NUC1 13C  
P1 40.00 usec  
PL1 -3.00 dB  
PL1W 60.64365387 W  
SFO1 100.6228298 MHz

==== CHANNEL f2 =====  
CPDPRG[2] waltz16  
NUC2 1H  
PCPD2 80.00 usec  
PL2 -1.00 dB  
PL12 14.39 dB  
PL13 18.00 dB  
PL2W 12.17476940 W  
PL12W 0.35193357 W  
PL13W 0.15327126 W  
SFO2 400.1316005 MHz

F2 - Processing parameters  
SI 32768  
SF 100.6127774 MHz  
WDW EM  
SSB 0  
LB 1.00 Hz  
GB 0  
PC 1.40

7.427  
7.408  
7.396  
7.377  
7.366  
7.347  
7.328  
7.315  
7.312  
7.297  
7.294  
7.279  
7.276  
7.259  
7.238  
7.223  
7.202  
7.184  
7.164  
7.144

5.120  
5.105

2.661  
2.598  
2.582  
2.569  
2.553  
1.760  
1.729  
1.675  
1.671  
1.648  
1.608  
1.577  
1.559  
1.489  
1.460  
1.438  
1.408  
1.356  
1.326  
1.297  
1.269  
1.240  
1.210  
1.161  
1.098  
1.070

Current Data Parameters  
NAME lsx-project3-31-h-fr  
EXPNO 1  
PROCNO 1

F2 - Acquisition Parameters  
Date\_ 20220723  
Time 14.12  
INSTRUM spect  
PROBHD 5 mm PABBO BB/  
PULPROG zg30  
TD 65536  
SOLVENT CDC13  
NS 16  
DS 2  
SWH 8012.820 Hz  
FIDRES 0.122266 Hz  
AQ 4.0894465 sec  
RG 31.55  
DW 62.400 usec  
DE 6.50 usec  
TE 295.4 K  
D1 1.00000000 sec  
TD0 1

==== CHANNEL f1 =====  
SFO1 400.1324710 MHz  
NUC1 1H  
P1 14.50 usec  
PLW1 11.99499989 W

F2 - Processing parameters  
SI 65536  
SF 400.1300190 MHz  
WDW EM  
SSB 0  
LB 0.30 Hz  
GB 0  
PC 1.00

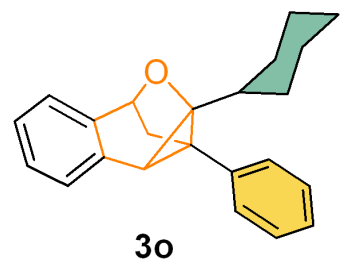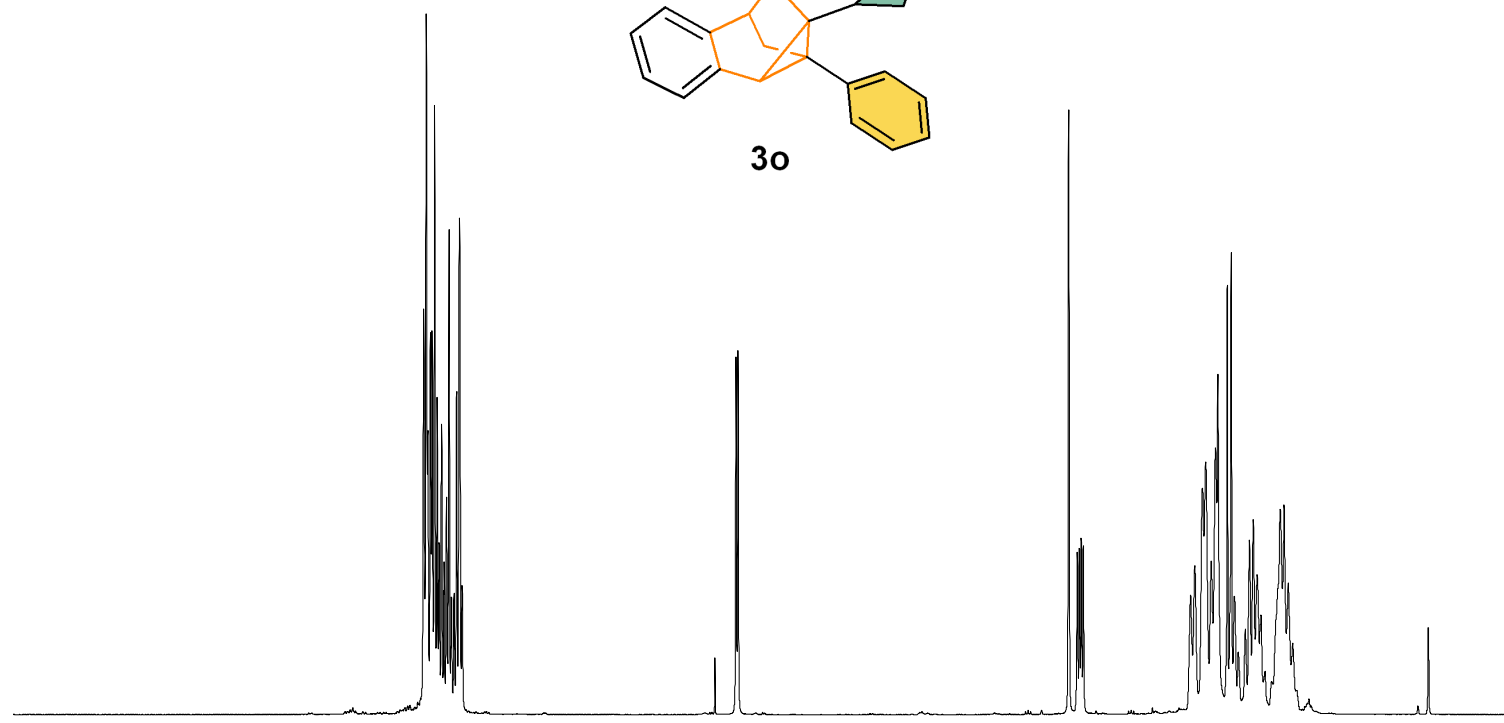

10 9 8 7 6 5 4 3 2 1 ppm

2.44  
5.16  
1.86

1.00

1.00  
1.04

1.09  
4.27  
2.12  
2.53  
3.24

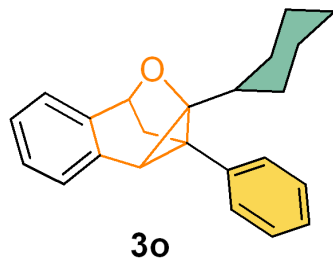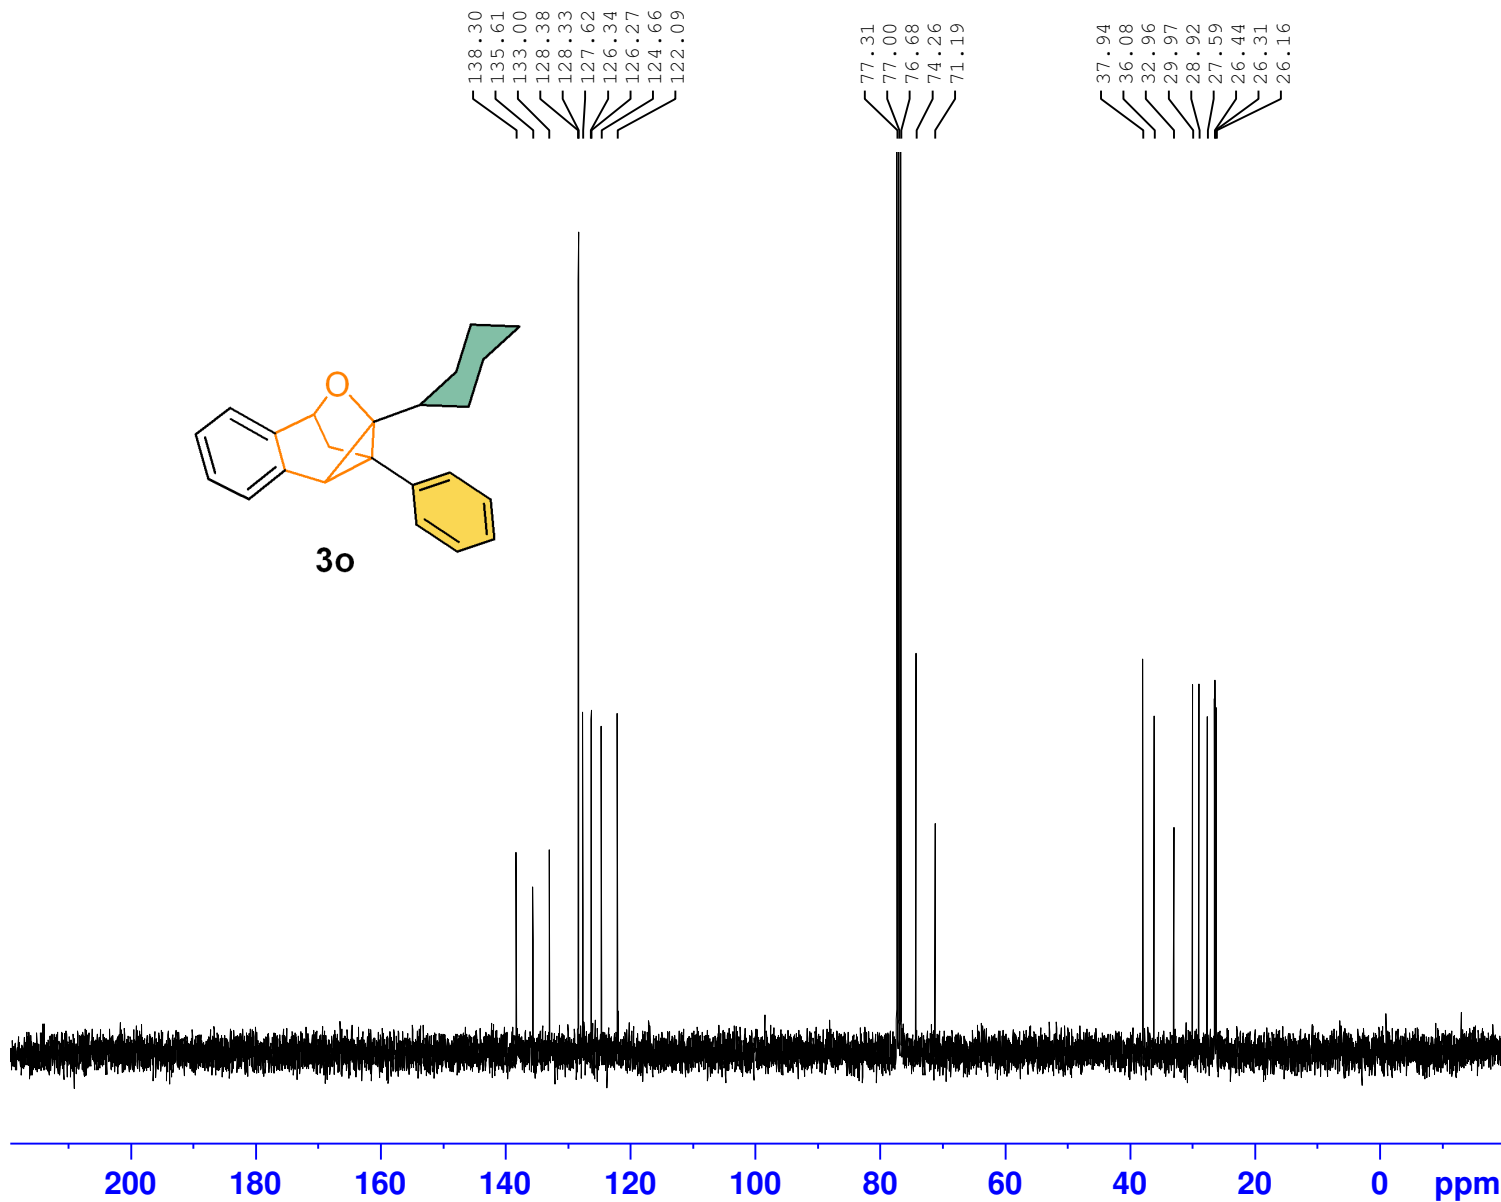

Current Data Parameters  
 NAME lsx-project3-31-c-fr  
 EXPNO 1  
 PROCNO 1

F2 - Acquisition Parameters  
 Date\_ 20220723  
 Time 14.15  
 INSTRUM spect  
 PROBHD 5 mm PABBO BB/  
 PULPROG zgpg30  
 TD 65536  
 SOLVENT CDCl3  
 NS 30  
 DS 2  
 SWH 24038.461 Hz  
 FIDRES 0.366798 Hz  
 AQ 1.3631488 sec  
 RG 196.92  
 DW 20.800 usec  
 DE 6.50 usec  
 TE 296.1 K  
 D1 2.00000000 sec  
 D11 0.03000000 sec  
 TD0 1

==== CHANNEL f1 =====  
 SFO1 100.6228298 MHz  
 NUC1 13C  
 P1 9.70 usec  
 PLW1 46.98899841 W

==== CHANNEL f2 =====  
 SFO2 400.1316005 MHz  
 NUC2 1H  
 CPDPRG[2] waltz16  
 PCPD2 90.00 usec  
 PLW2 11.99499989 W  
 PLW12 0.34213999 W  
 PLW13 0.27713001 W

F2 - Processing parameters  
 SI 32768  
 SF 100.6127761 MHz  
 WDW EM  
 SSB 0  
 LB 1.00 Hz  
 GB 0  
 PC 1.40

7.244  
7.238  
7.231  
7.223  
7.215  
7.204  
7.199  
7.192  
7.187  
7.181  
7.124  
7.118  
7.113  
7.101  
7.096

5.319  
5.304

3.188  
2.611  
2.609  
2.595  
2.594  
2.581  
2.579  
2.571  
2.566  
2.564

1.724  
1.695

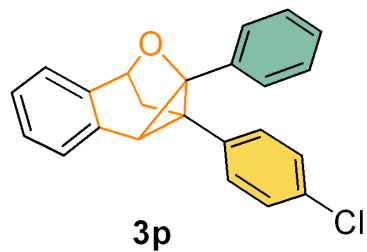

Current Data Parameters  
NAME lsx-8-143cc-h-fr  
EXPNO 1  
PROCNO 1

F2 - Acquisition Parameters  
Date\_ 20240722  
Time 19.31  
INSTRUM spect  
PROBHD 5 mm PABBO BB/  
PULPROG zg30  
TD 65536  
SOLVENT CDCl3  
NS 16  
DS 2  
SWH 8012.820 Hz  
FIDRES 0.122266 Hz  
AQ 4.0894465 sec  
RG 62.93  
DW 62.400 usec  
DE 6.50 usec  
TE 296.1 K  
D1 1.00000000 sec  
TD0 1

==== CHANNEL f1 =====  
SFO1 400.1324710 MHz  
NUC1 1H  
P1 14.50 usec  
PLW1 11.99499989 W

F2 - Processing parameters  
SI 65536  
SF 400.1300214 MHz  
WDW EM  
SSB 0  
LB 0.30 Hz  
GB 0  
PC 1.00

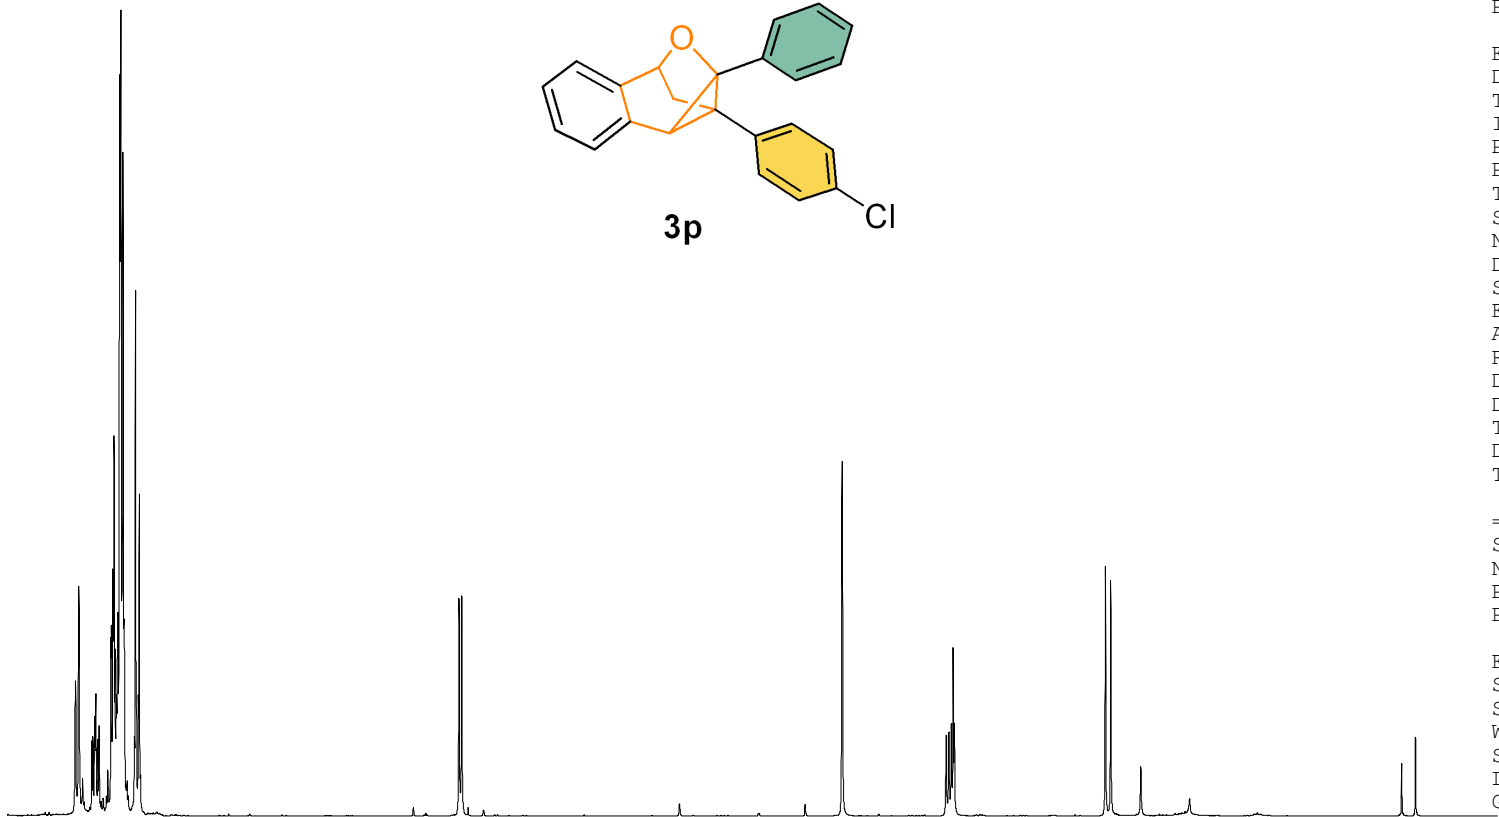

7.5 7.0 6.5 6.0 5.5 5.0 4.5 4.0 3.5 3.0 2.5 2.0 1.5 1.0 0.5 ppm

1.19  
1.09  
8.94  
2.04

0.99

1.00

1.21

1.00

136.23  
135.69  
135.03  
132.57  
131.98  
130.35  
128.72  
128.15  
127.28  
126.93  
126.51  
125.64  
122.53

77.48  
77.16  
76.84  
74.99  
68.77

37.19  
35.30  
31.73

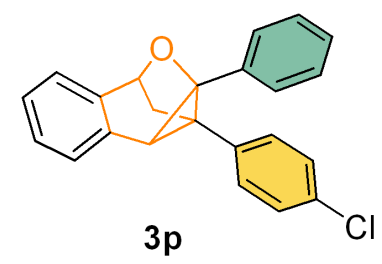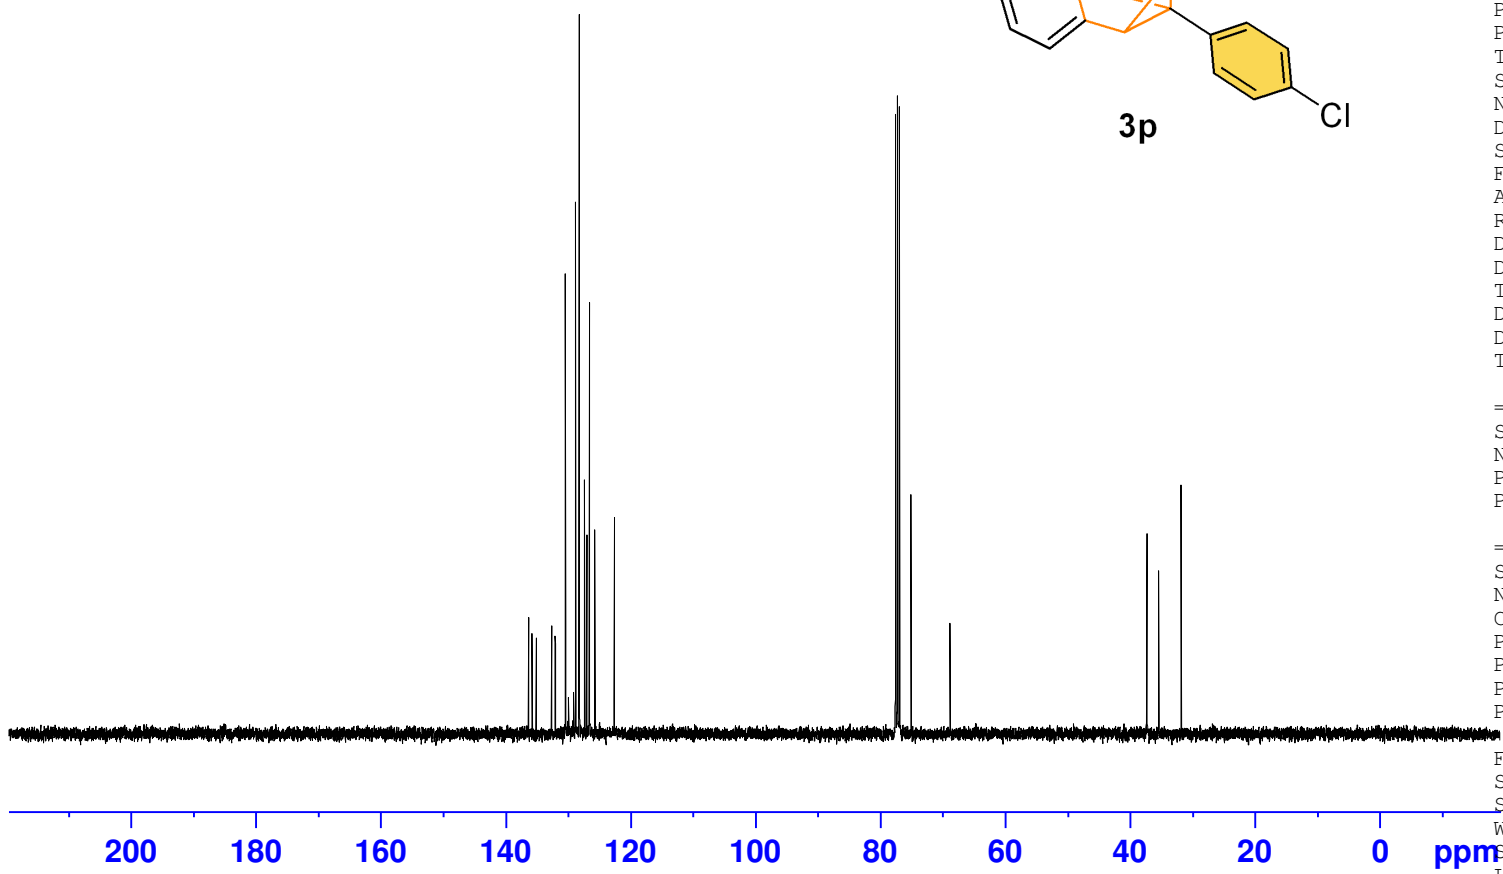

Current Data Parameters  
NAME lsx-8-143cc-c-fr  
EXPNO 1  
PROCNO 1

F2 - Acquisition Parameters  
Date\_ 20240722  
Time 19.38  
INSTRUM spect  
PROBHD 5 mm PABBO BB/  
PULPROG zgpg30  
TD 65536  
SOLVENT CDC13  
NS 116  
DS 2  
SWH 24038.461 Hz  
FIDRES 0.366798 Hz  
AQ 1.3631488 sec  
RG 196.92  
DW 20.800 usec  
DE 6.50 usec  
TE 297.0 K  
D1 2.00000000 sec  
D11 0.03000000 sec  
TD0 1

==== CHANNEL f1 =====  
SFO1 100.6228298 MHz  
NUC1 13C  
P1 9.70 usec  
PLW1 46.98899841 W

==== CHANNEL f2 =====  
SFO2 400.1316005 MHz  
NUC2 1H  
CPDPRG[2] waltz16  
PCPD2 90.00 usec  
PLW2 11.99499989 W  
PLW12 0.34213999 W  
PLW13 0.27713001 W

F2 - Processing parameters  
SI 32768  
SF 100.6127597 MHz  
WDW EM  
SSB 0  
LB 1.00 Hz  
GB 0  
PC 1.40

7.457  
7.438  
7.360  
7.351  
7.348  
7.342  
7.338  
7.330  
7.320  
7.257  
7.250  
7.248  
7.238  
7.236  
7.212  
7.209  
7.202  
7.195  
7.188  
7.182  
7.178  
7.175  
7.167  
7.101  
7.096  
7.085  
7.080  
7.061  
7.040  
5.313  
5.298

3.179  
2.639  
2.637  
2.624  
2.622  
2.610  
2.608  
2.594  
2.592  
2.295  
1.726  
1.696  
1.545

Current Data Parameters  
NAME lsx-8-143b-h-fr  
EXPNO 1  
PROCNO 1

F2 - Acquisition Parameters  
Date\_ 20240721  
Time 18.22  
INSTRUM spect  
PROBHD 5 mm PABBO BB/  
PULPROG zg30  
TD 65536  
SOLVENT CDC13  
NS 16  
DS 2  
SWH 8012.820 Hz  
FIDRES 0.122266 Hz  
AQ 4.0894465 sec  
RG 164.33  
DW 62.400 usec  
DE 6.50 usec  
TE 296.2 K  
D1 1.00000000 sec  
TD0 1

==== CHANNEL f1 =====  
SFO1 400.1324710 MHz  
NUC1 1H  
P1 14.50 usec  
PLW1 11.99499989 W

F2 - Processing parameters  
SI 65536  
SF 400.1300107 MHz  
WDW EM  
SSB 0  
LB 0.30 Hz  
GB 0  
PC 1.00

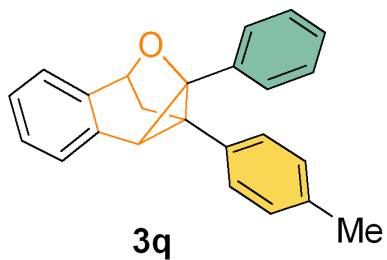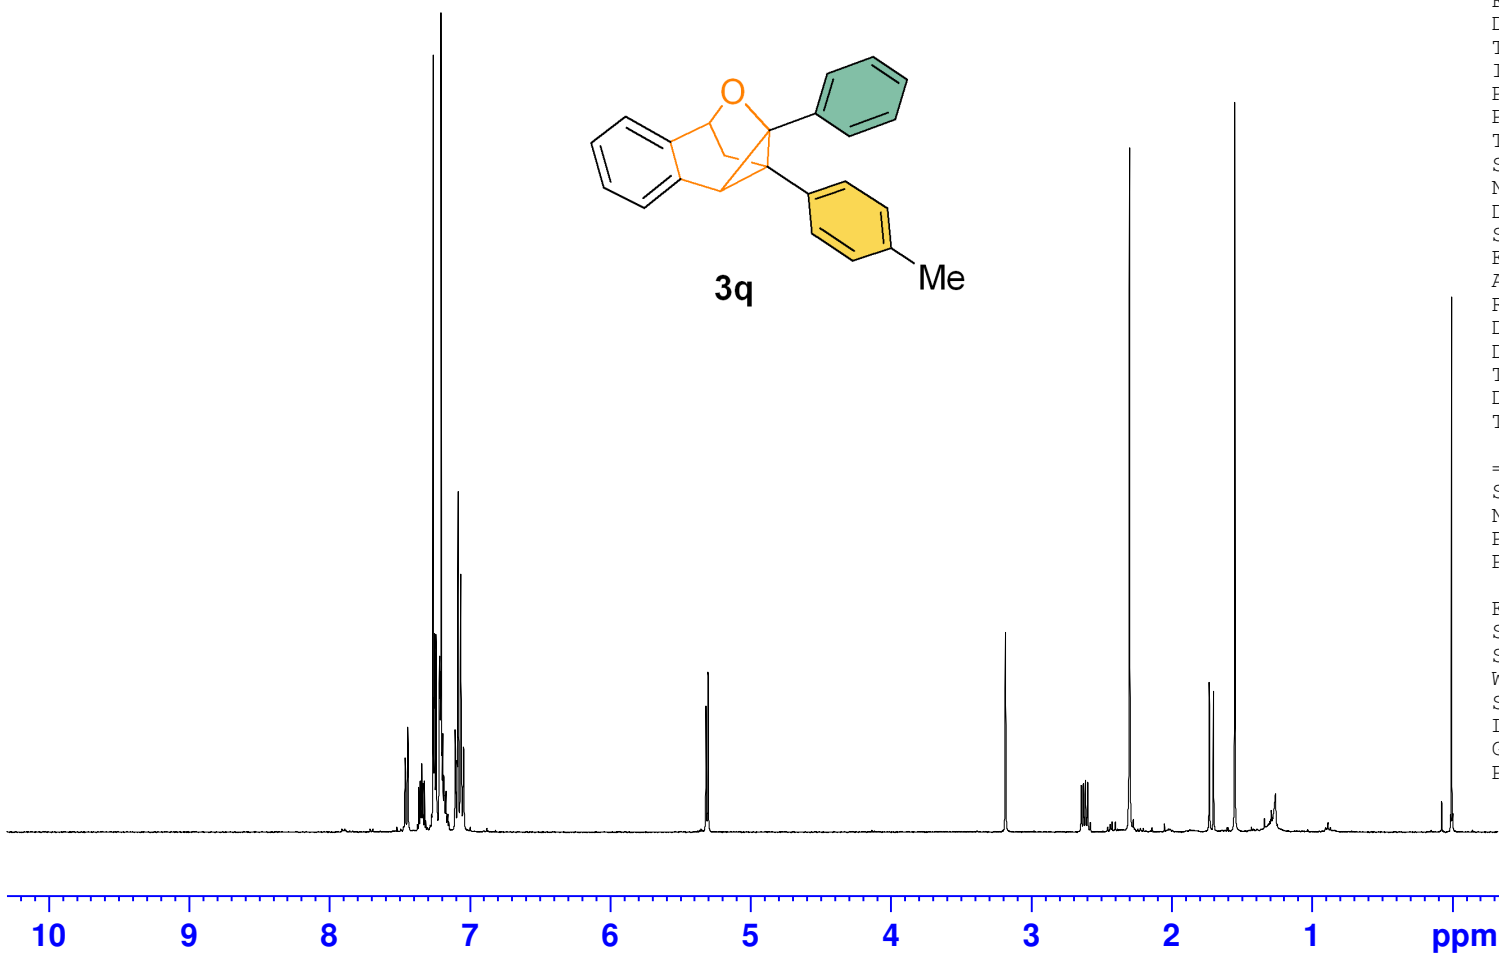

1.02  
1.04  
1.98  
4.95  
4.13

1.06

1.00

1.00

3.06

1.04



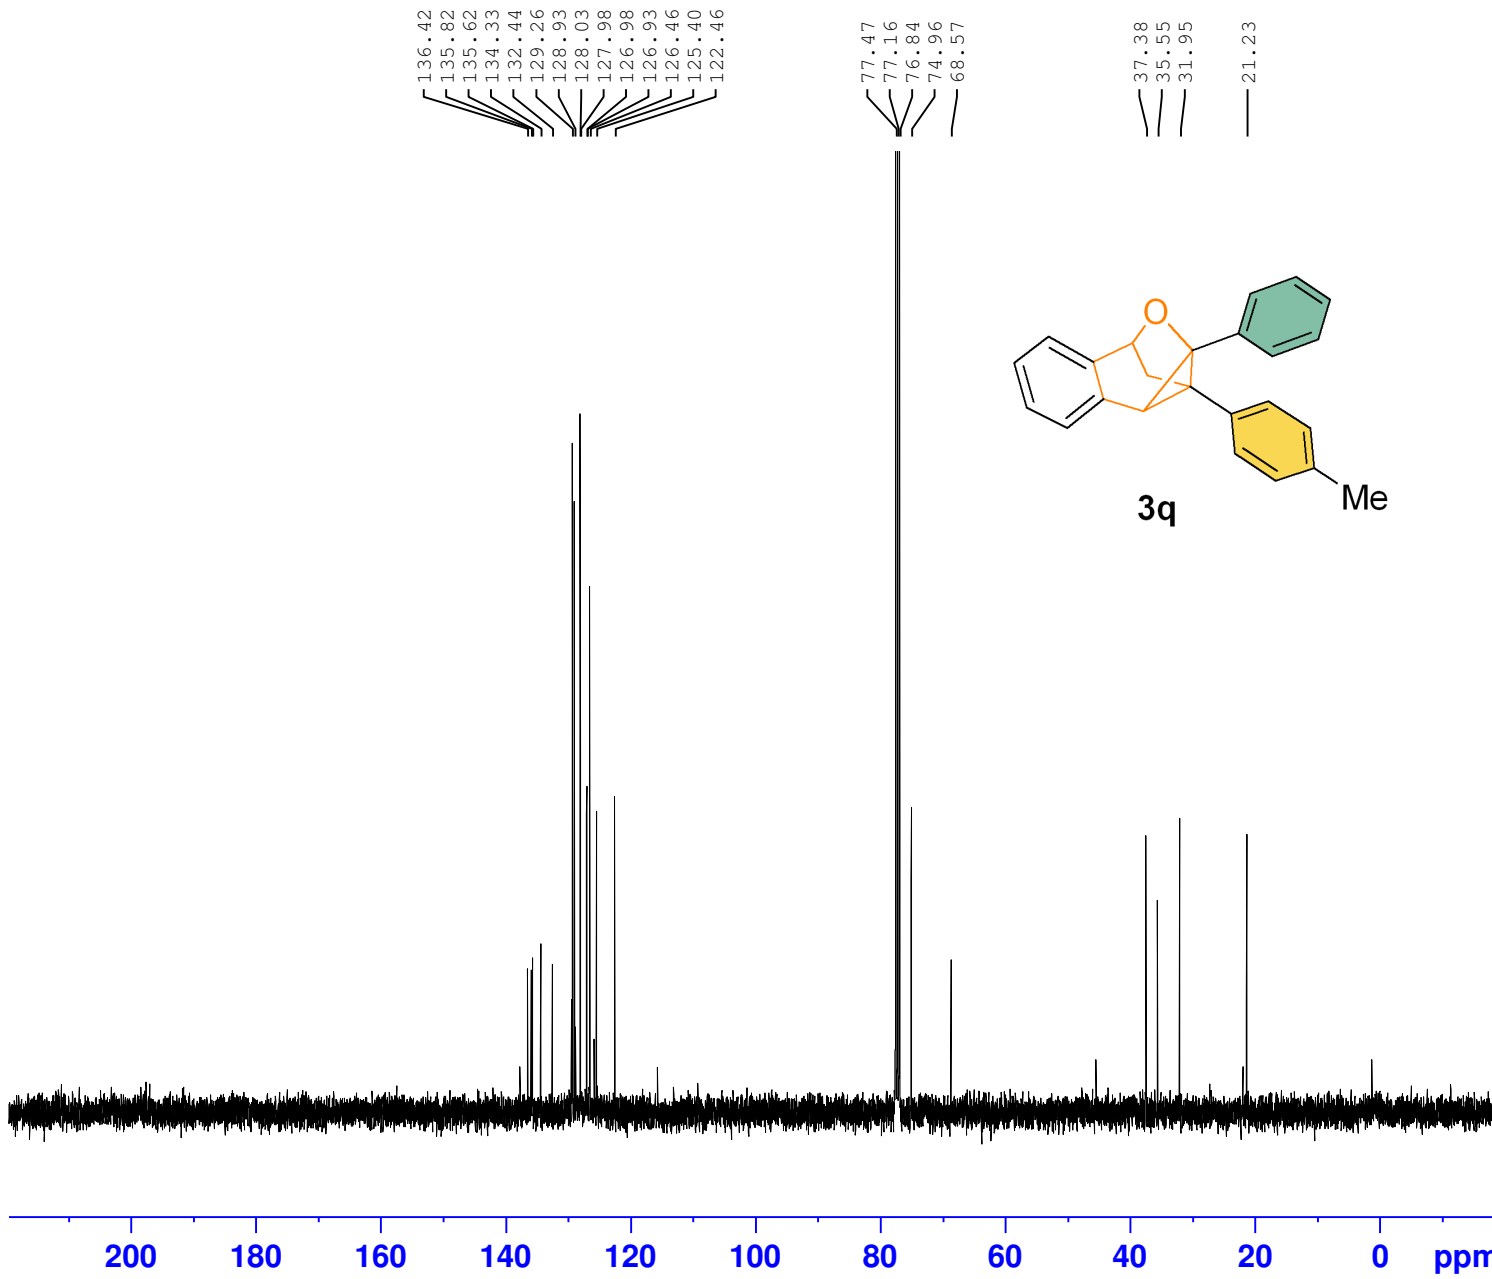

Current Data Parameters  
 NAME lsx-8-143bb-c-fr  
 EXPNO 1  
 PROCNO 1

F2 - Acquisition Parameters  
 Date\_ 20240722  
 Time 19.26  
 INSTRUM spect  
 PROBHD 5 mm PABBO BB/  
 PULPROG zgpg30  
 TD 65536  
 SOLVENT CDC13  
 NS 71  
 DS 2  
 SWH 24038.461 Hz  
 FIDRES 0.366798 Hz  
 AQ 1.3631488 sec  
 RG 196.92  
 DW 20.800 usec  
 DE 6.50 usec  
 TE 296.9 K  
 D1 2.00000000 sec  
 D11 0.03000000 sec  
 TD0 1

===== CHANNEL f1 =====  
 SFO1 100.6228298 MHz  
 NUC1 13C  
 P1 9.70 usec  
 PLW1 46.98899841 W

===== CHANNEL f2 =====  
 SFO2 400.1316005 MHz  
 NUC2 1H  
 CPDPRG[2] waltz16  
 PCPD2 90.00 usec  
 PLW2 11.99499989 W  
 PLW12 0.34213999 W  
 PLW13 0.27713001 W

F2 - Processing parameters  
 SI 32768  
 SF 100.6127593 MHz  
 WDW EM  
 SSB 0  
 LB 1.00 Hz  
 GB 0  
 PC 1.40

7.434  
7.359  
7.349  
7.347  
7.340  
7.337  
7.329  
7.318  
7.268  
7.266  
7.253  
7.250  
7.247  
7.237  
7.219  
7.213  
7.209  
7.206  
7.195  
7.185  
7.181  
7.174  
7.167  
7.164  
7.159  
7.151  
7.138  
7.131  
7.125  
7.114  
7.109  
7.101  
6.806  
6.798  
6.793  
6.782  
6.777  
6.769  
5.308  
5.293  
3.764

3.155  
2.605  
2.590  
2.576  
2.574  
2.561

1.717  
1.688  
1.547

0.000

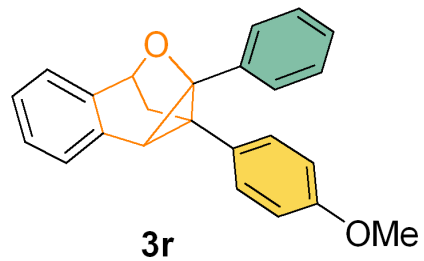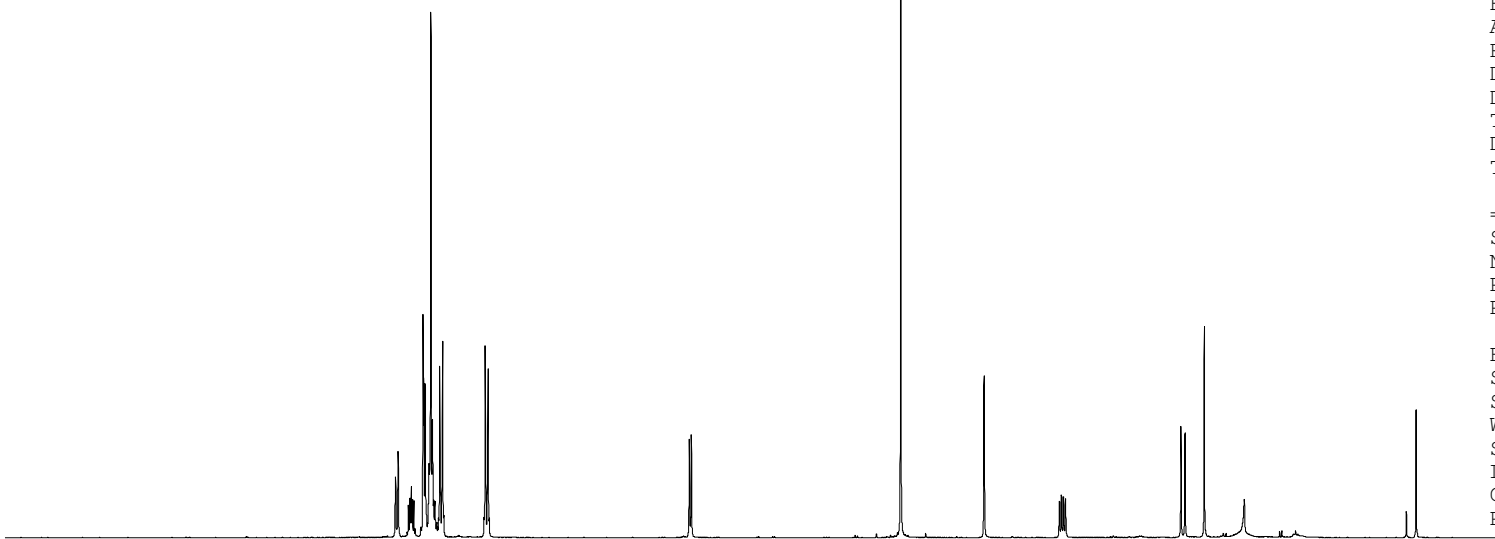

Current Data Parameters  
NAME lsx-8-143aa-h-fr  
EXPNO 1  
PROCNO 1

F2 - Acquisition Parameters  
Date\_ 20240722  
Time 19.00  
INSTRUM spect  
PROBHD 5 mm PABBO BB/  
PULPROG zg30  
TD 65536  
SOLVENT CDCl3  
NS 16  
DS 2  
SWH 8012.820 Hz  
FIDRES 0.122266 Hz  
AQ 4.0894465 sec  
RG 164.33  
DW 62.400 usec  
DE 6.50 usec  
TE 295.9 K  
D1 1.00000000 sec  
TD0 1

==== CHANNEL f1 =====  
SFO1 400.1324710 MHz  
NUC1 1H  
P1 14.50 usec  
PLW1 11.99499989 W

F2 - Processing parameters  
SI 65536  
SF 400.1300124 MHz  
WDW EM  
SSB 0  
LB 0.30 Hz  
GB 0  
PC 1.00

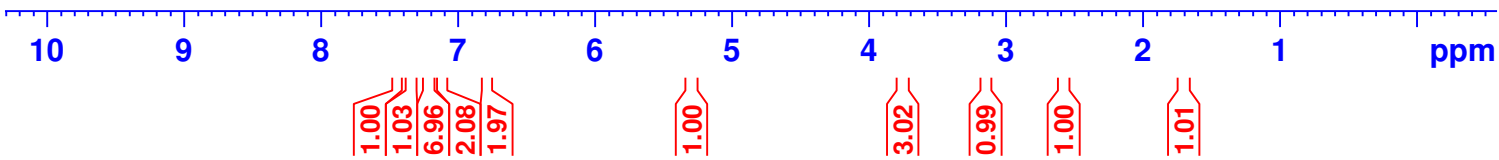

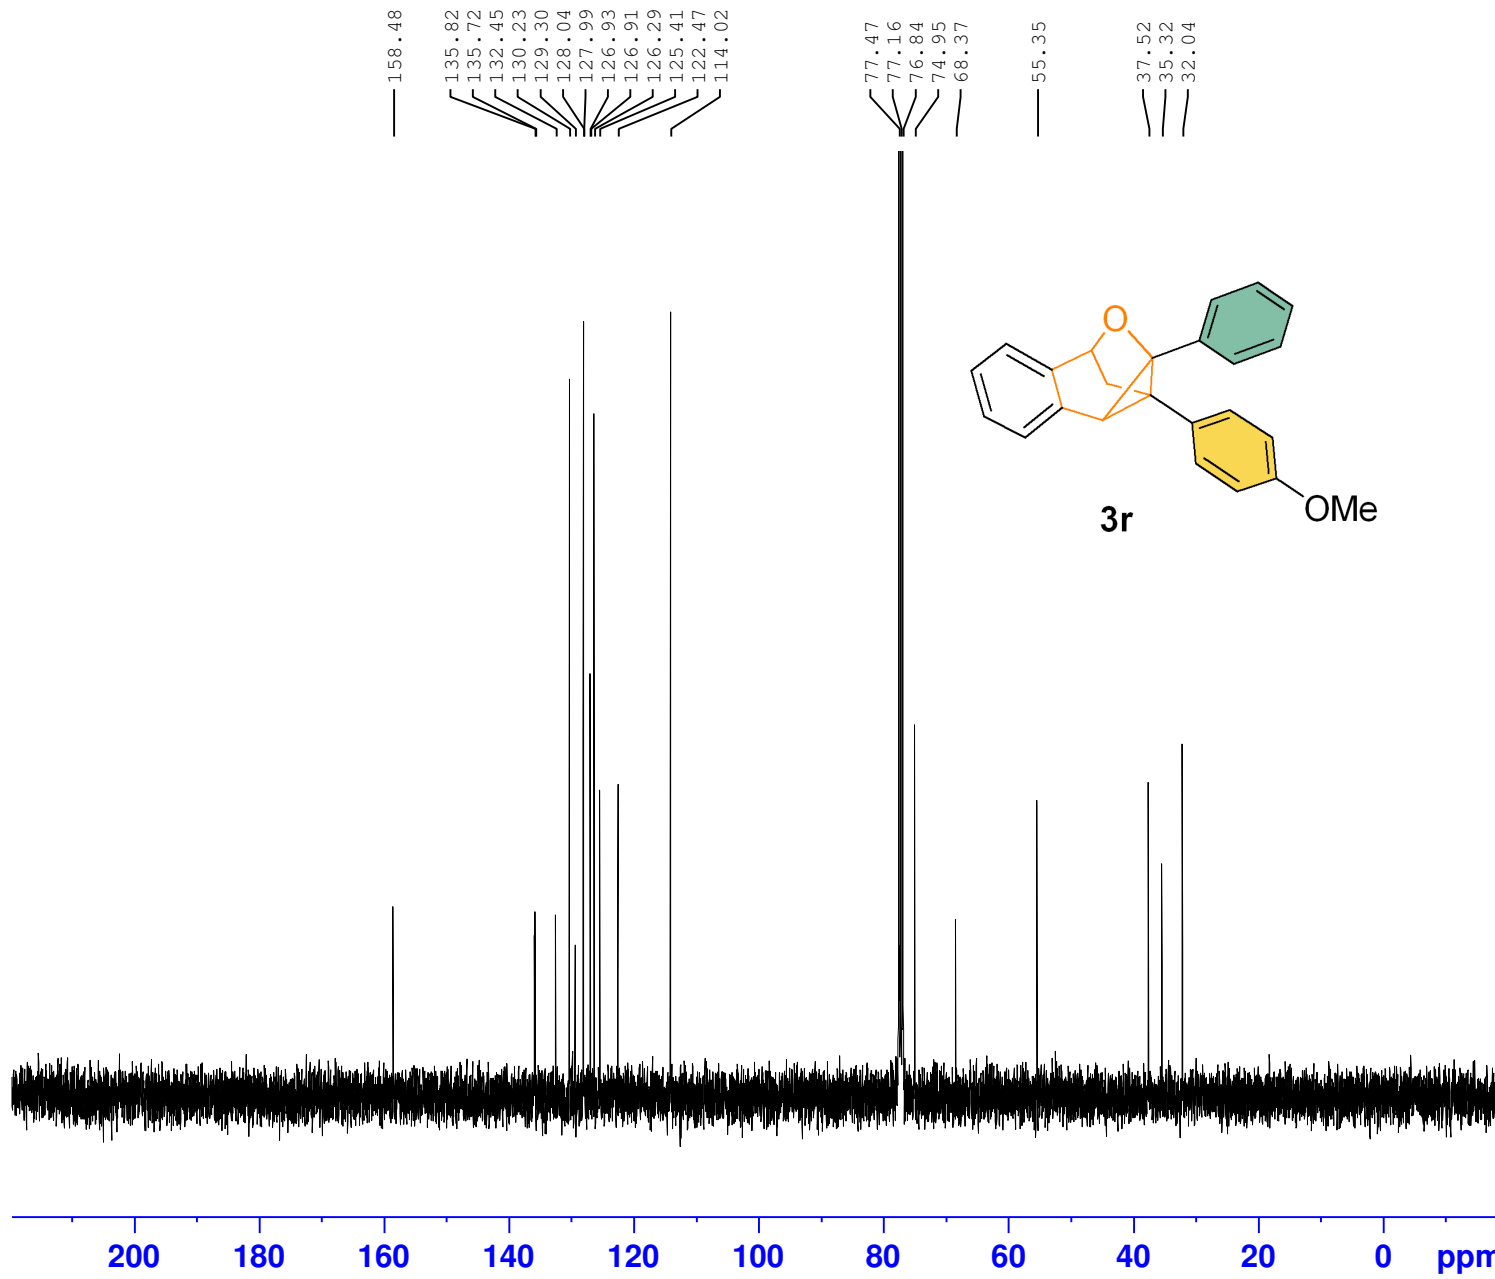

158.48  
 135.82  
 135.72  
 132.45  
 130.23  
 129.30  
 128.04  
 127.99  
 126.93  
 126.91  
 126.29  
 125.41  
 122.47  
 114.02

77.47  
 77.16  
 76.84  
 74.95  
 68.37  
 55.35  
 37.52  
 35.32  
 32.04

Current Data Parameters  
 NAME lsx-8-143aa-c-fr  
 EXPNO 1  
 PROCNO 1

F2 - Acquisition Parameters  
 Date\_ 20240722  
 Time 19.17  
 INSTRUM spect  
 PROBHD 5 mm PABBO BB/  
 PULPROG zgpg30  
 TD 65536  
 SOLVENT CDC13  
 NS 268  
 DS 2  
 SWH 24038.461 Hz  
 FIDRES 0.366798 Hz  
 AQ 1.3631488 sec  
 RG 196.92  
 DW 20.800 usec  
 DE 6.50 usec  
 TE 297.0 K  
 D1 2.00000000 sec  
 D11 0.03000000 sec  
 TD0 1

===== CHANNEL f1 =====  
 SFO1 100.6228298 MHz  
 NUC1 13C  
 P1 9.70 usec  
 PLW1 46.98899841 W

===== CHANNEL f2 =====  
 SFO2 400.1316005 MHz  
 NUC2 1H  
 CPDPRG[2] waltz16  
 PCPD2 90.00 usec  
 PLW2 11.99499989 W  
 PLW12 0.34213999 W  
 PLW13 0.27713001 W

F2 - Processing parameters  
 SI 32768  
 SF 100.6127560 MHz  
 WDW EM  
 SSB 0  
 LB 1.00 Hz  
 GB 0  
 PC 1.40

7.493  
7.475  
7.300  
7.297  
7.279  
7.239  
7.234  
7.226  
7.221  
7.208  
7.201  
7.197  
7.182  
7.179  
7.165  
7.157  
7.154  
7.139  
7.115  
7.111  
7.102  
7.093  
7.091  
7.084  
7.064  
7.051  
7.047  
7.033  
7.025  
7.022  
7.018  
7.013  
7.009  
7.003  
6.985  
6.956  
6.952  
6.949  
6.939  
6.934  
6.916  
3.223  
3.069  
3.046  
3.025  
2.831  
2.815  
2.813  
2.797  
2.791  
2.776  
2.768  
2.753  
2.738  
2.074  
2.058  
2.040  
2.036  
2.024  
2.018  
1.996

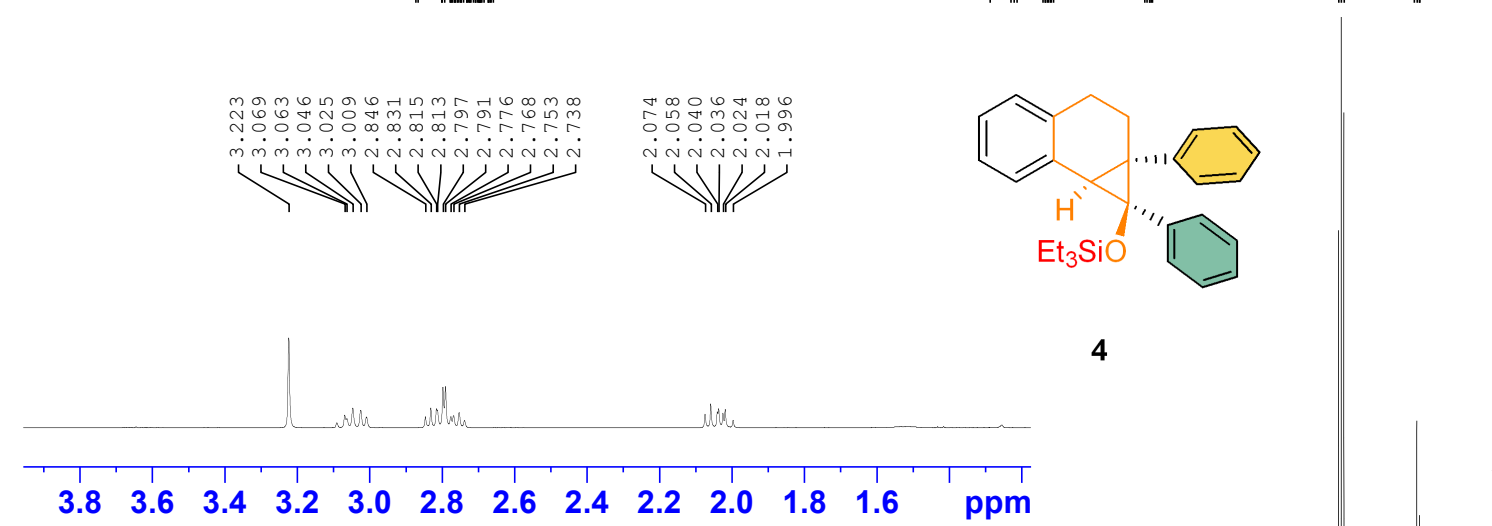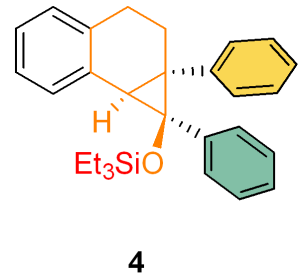

Current Data Parameters  
 NAME lsx-2-144-h-fr  
 EXPNO 1  
 PROCNO 1

F2 - Acquisition Parameters  
 Date\_ 20220805  
 Time\_ 19.18  
 INSTRUM spect  
 PROBHD 5 mm PABBO BB/  
 PULPROG zg30  
 TD 65536  
 SOLVENT CDCl3  
 NS 16  
 DS 2  
 SWH 8012.820 Hz  
 FIDRES 0.122266 Hz  
 AQ 4.0894465 sec  
 RG 31.55  
 DW 62.400 usec  
 DE 6.50 usec  
 TE 296.1 K  
 D1 1.00000000 sec  
 TD0 1

==== CHANNEL f1 =====  
 SFO1 400.1324710 MHz  
 NUC1 1H  
 P1 14.50 usec  
 PLW1 11.99499989 W

F2 - Processing parameters  
 SI 65536  
 SF 400.1300206 MHz  
 WDW EM  
 SSB 0  
 LB 0.30 Hz  
 GB 0  
 PC 1.00

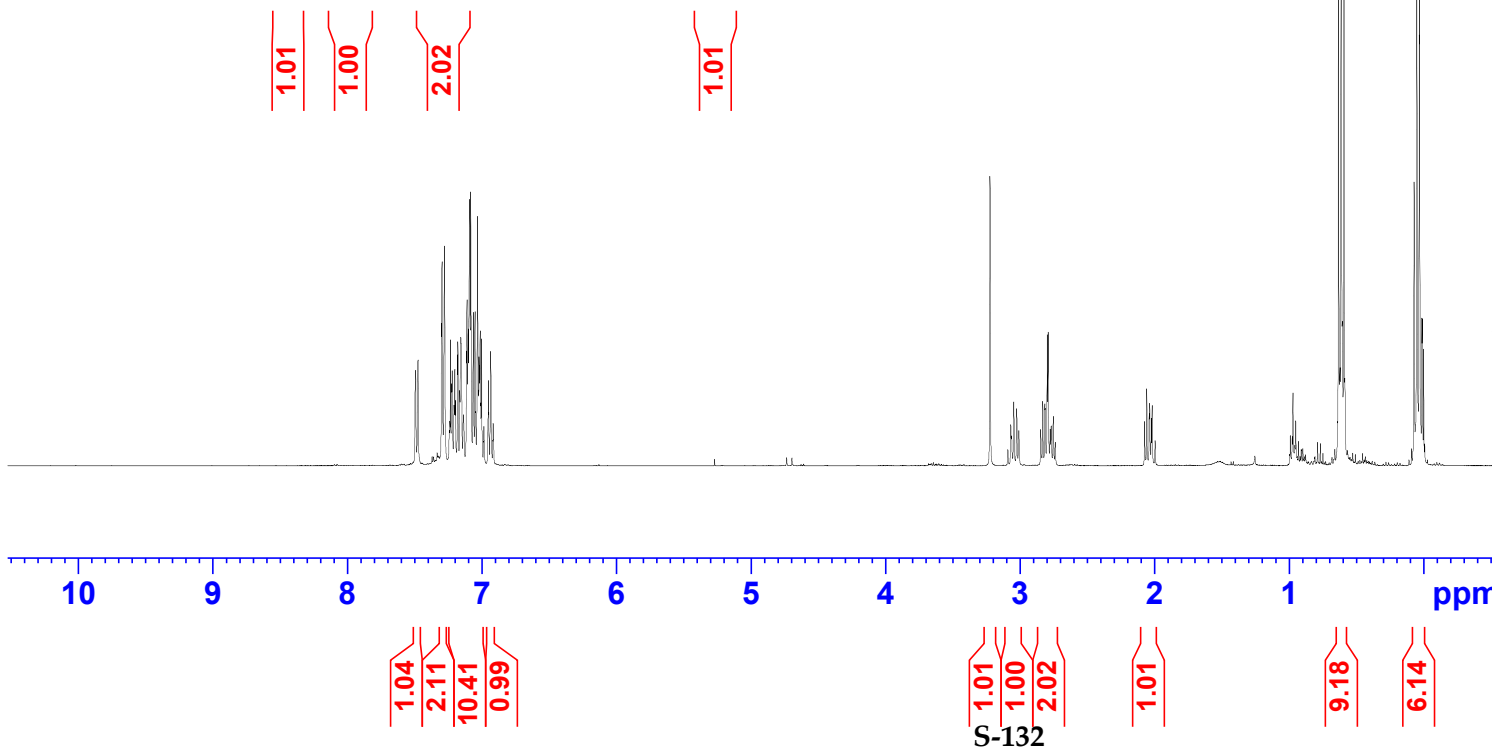

S-132

144.01  
141.45  
137.88  
133.19  
130.74  
128.68  
128.46  
128.37  
127.67  
127.38  
126.72  
125.90  
125.54  
125.44

77.32  
77.00  
76.68  
73.02

37.95  
28.66  
28.62  
27.64

6.77  
5.25

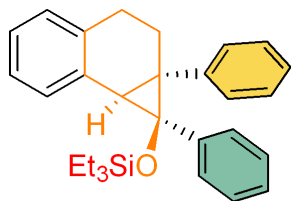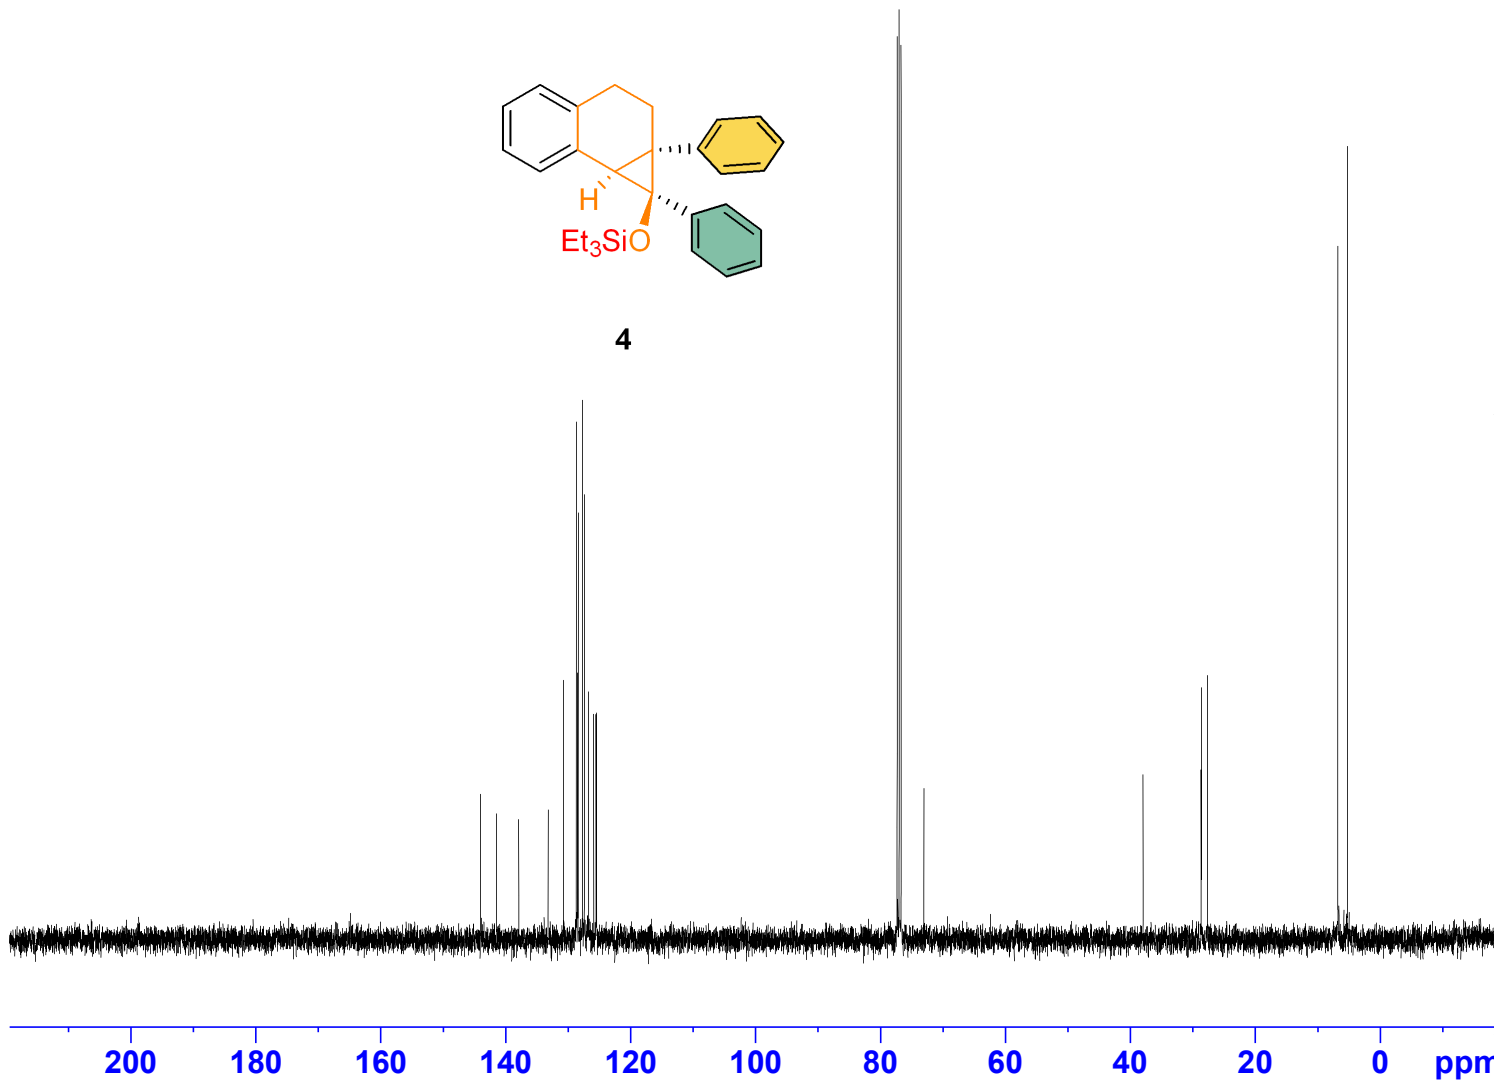

Current Data Parameters  
NAME lsx-2-144-cc-fr  
EXPNO 1  
PROCNO 1

F2 - Acquisition Parameters  
Date\_ 20220805  
Time\_ 19.25  
INSTRUM spect  
PROBHD 5 mm PABBO BB/  
PULPROG zgpg30  
TD 65536  
SOLVENT CDCl3  
NS 52  
DS 2  
SWH 24038.461 Hz  
FIDRES 0.366798 Hz  
AQ 1.3631488 sec  
RG 196.92  
DW 20.800 usec  
DE 6.50 usec  
TE 296.7 K  
D1 2.0000000 sec  
D11 0.03000000 sec  
TD0 1

==== CHANNEL f1 =====  
SFO1 100.6228298 MHz  
NUC1 13C  
P1 9.70 usec  
PLW1 46.98899841 W

==== CHANNEL f2 =====  
SFO2 400.1316005 MHz  
NUC2 1H  
CPDPRG[2] waltz16  
PCPD2 90.00 usec  
PLW2 11.99499989 W  
PLW12 0.34213999 W  
PLW13 0.27713001 W

F2 - Processing parameters  
SI 32768  
SF 100.6127737 MHz  
WDW EM  
SSB 0  
LB 1.00 Hz  
GB 0  
PC 1.40

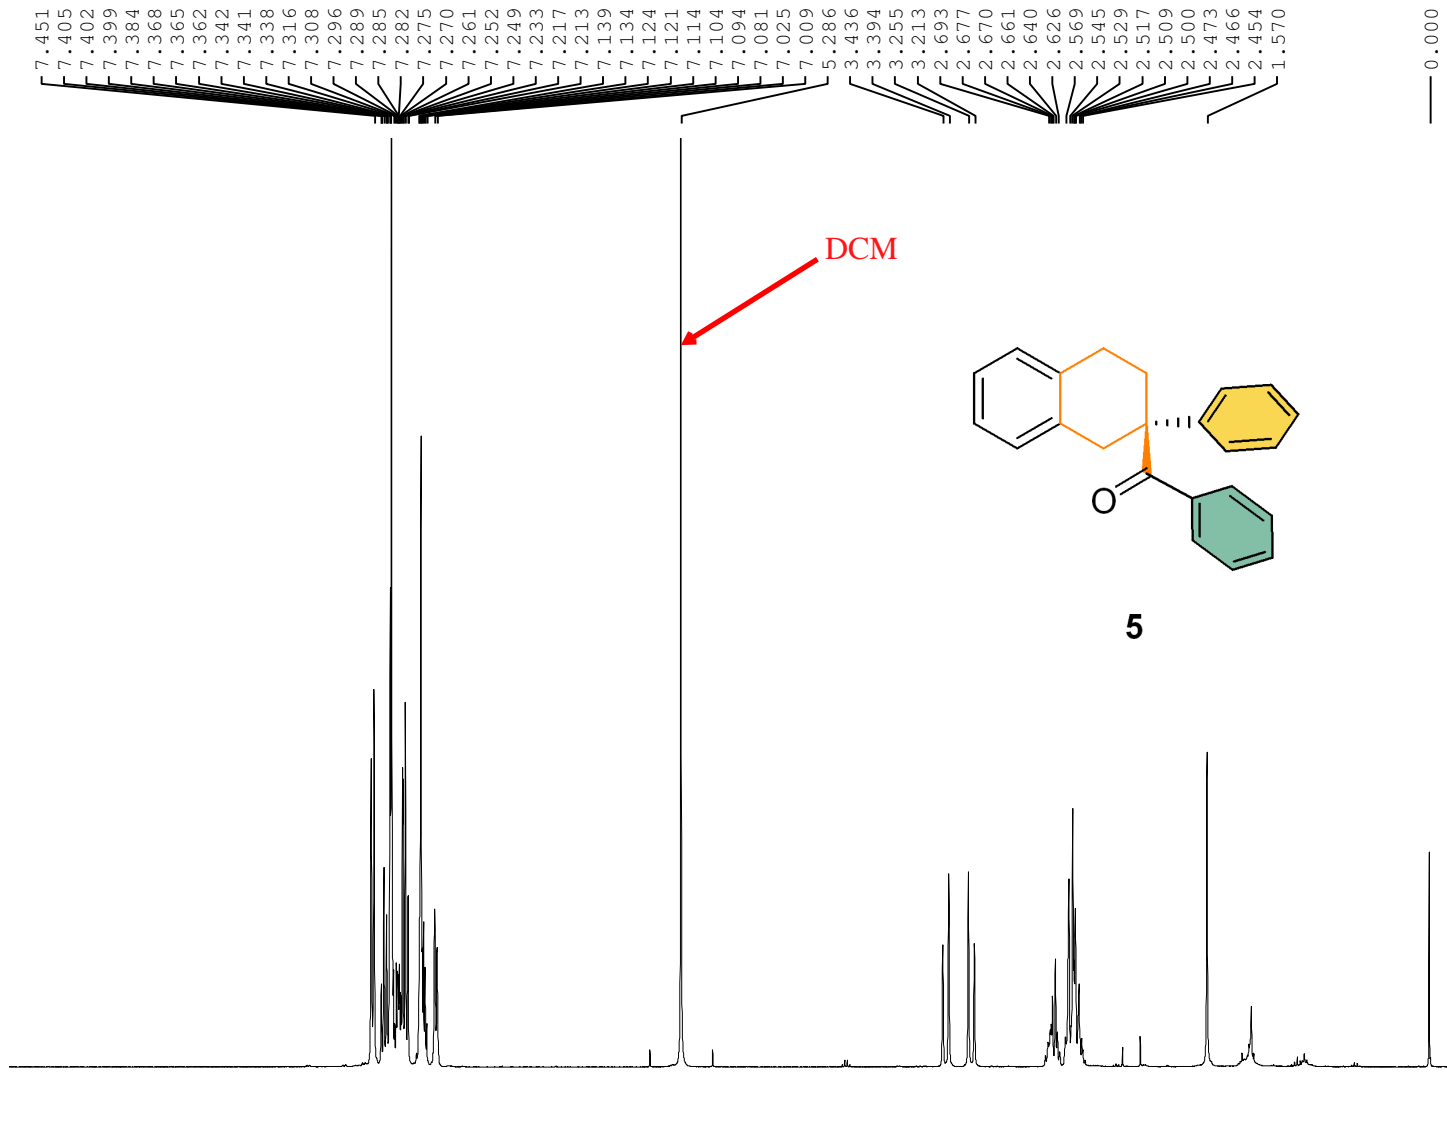

Current Data Parameters  
 NAME lsx-8-tbaf-h-fr  
 EXPNO 1  
 PROCNO 1

F2 - Acquisition Parameters  
 Date\_ 20240713  
 Time 19.24  
 INSTRUM spect  
 PROBHD 5 mm DUL 13C-1  
 PULPROG zg30  
 TD 65536  
 SOLVENT CDCl3  
 NS 16  
 DS 2  
 SWH 8223.685 Hz  
 FIDRES 0.125483 Hz  
 AQ 3.9845889 sec  
 RG 362  
 DW 60.800 usec  
 DE 6.00 usec  
 TE 296.7 K  
 D1 1.00000000 sec  
 TD0 1

==== CHANNEL f1 =====  
 NUC1 1H  
 P1 15.80 usec  
 PL1 -1.00 dB  
 PL1W 12.17476940 W  
 SFO1 400.1324710 MHz

F2 - Processing parameters  
 SI 32768  
 SF 400.1300141 MHz  
 WDW EM  
 SSB 0  
 LB 0.30 Hz  
 GB 0  
 PC 1.00

— 202.44

142.87  
136.76  
135.62  
135.24  
131.88  
129.52  
129.28  
128.80  
128.17  
127.27  
126.43  
126.17  
125.98

77.48  
77.16  
76.84

54.50  
39.57  
31.99  
26.18

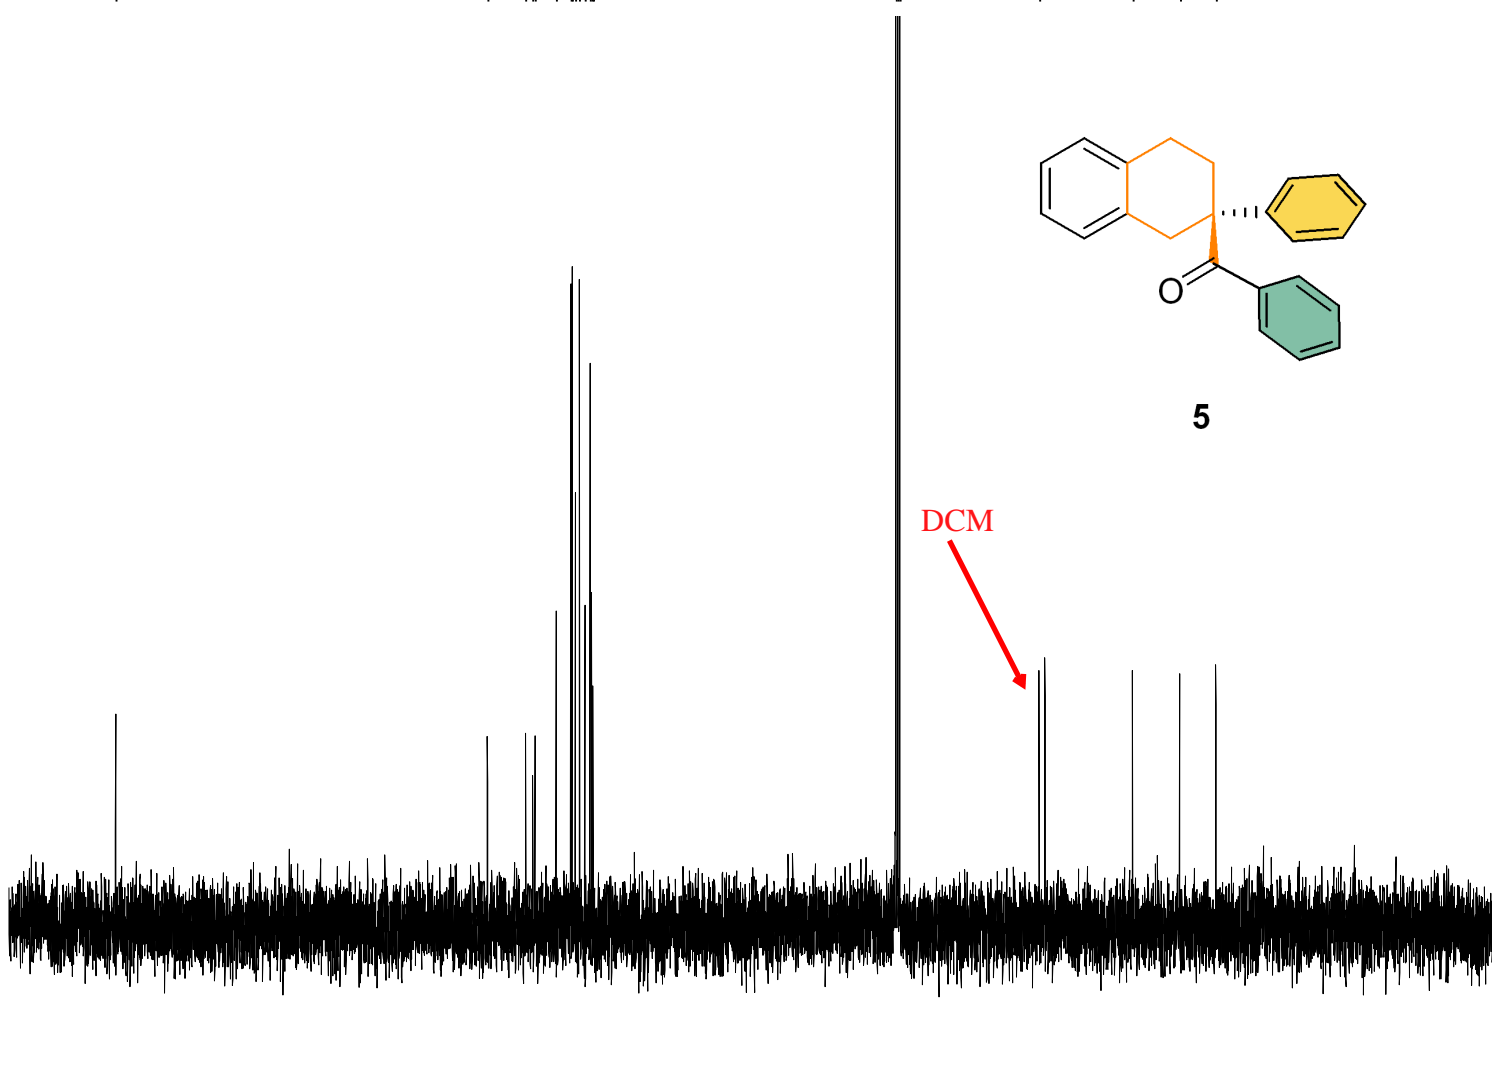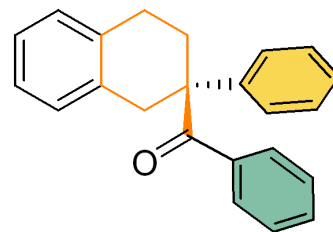

5

DCM

Current Data Parameters  
NAME lsx-8-tbaf-c-fr  
EXPNO 1  
PROCNO 1

F2 - Acquisition Parameters

Date\_ 20240713  
Time 19.36  
INSTRUM spect  
PROBHD 5 mm DUL 13C-1  
PULPROG zgpg30  
TD 65536  
SOLVENT CDC13  
NS 181  
DS 1  
SWH 24038.461 Hz  
FIDRES 0.366798 Hz  
AQ 1.3631488 sec  
RG 80.6  
DW 20.800 usec  
DE 6.00 usec  
TE 297.0 K  
D1 2.00000000 sec  
D11 0.03000000 sec  
TD0 1

==== CHANNEL f1 =====  
NUC1 13C  
P1 40.00 usec  
PL1 -3.00 dB  
PL1W 60.64365387 W  
SFO1 100.6228298 MHz

==== CHANNEL f2 =====  
CPDPRG[2] waltz16  
NUC2 1H  
PCPD2 80.00 usec  
PL2 -1.00 dB  
PL12 14.39 dB  
PL13 18.00 dB  
PL2W 12.17476940 W  
PL12W 0.35193357 W  
PL13W 0.15327126 W  
SFO2 400.1316005 MHz

F2 - Processing parameters  
SI 32768  
SF 100.6127572 MHz  
WDW EM  
SSB 0  
LB 1.00 Hz  
GB 0  
PC 1.40

```

=====
Acq. Operator   :                               Seq. Line :    5
Acq. Instrument : Instrument 1                  Location  :   41
Injection Date  : 1/8/2022 7:59:55 am         Inj       :    1
                                                Inj Volume: 5.000 µl

Acq. Method    : C:\Chem32\1\DATA\SUN_12 2022-08-01 21-33-13\IC-02-30.M
Last changed   :                               (modified after loading)

Analysis Method: C:\Users\Public\Documents\ChemStation\1\Data\SUN\SUN 2024-03-13 00-13-49\AD-01
-30-0.5.M (Sequence Method)
Last changed   : 13/3/2024 6:46:32 pm by SYSTEM
                                                (modified after loading)

Additional Info : Peak(s) manually integrated
  
```

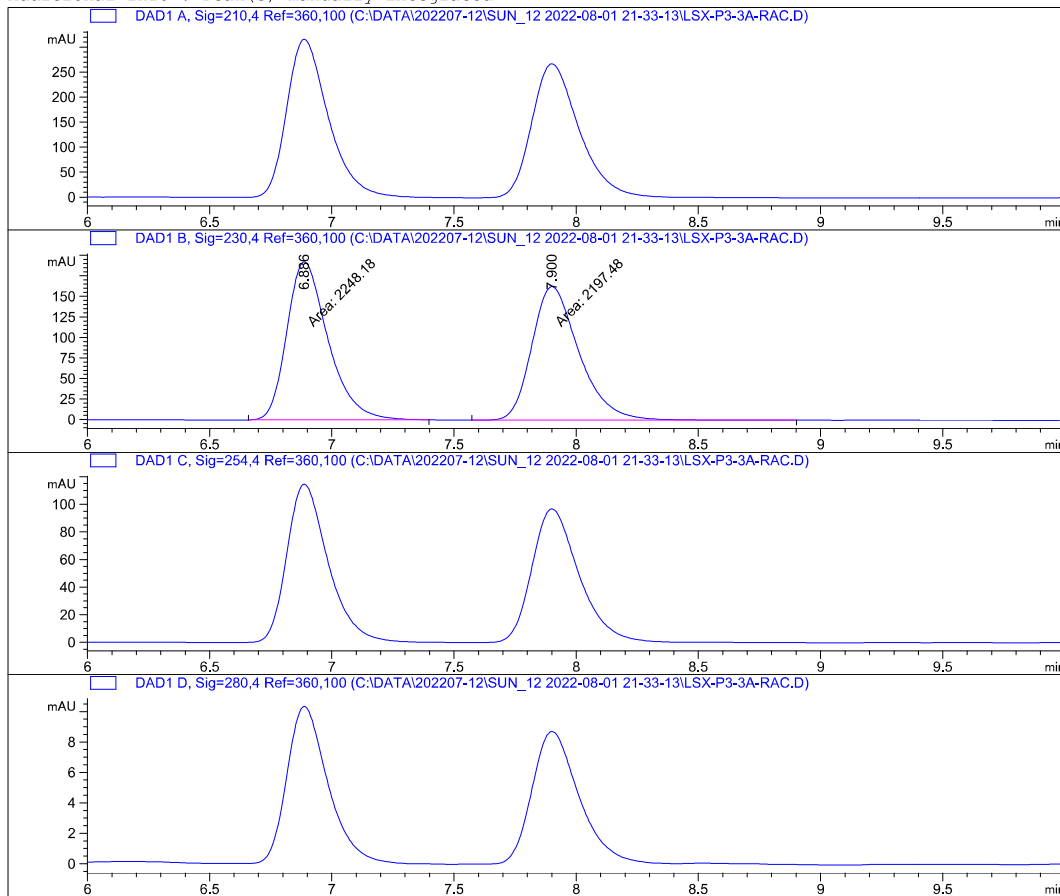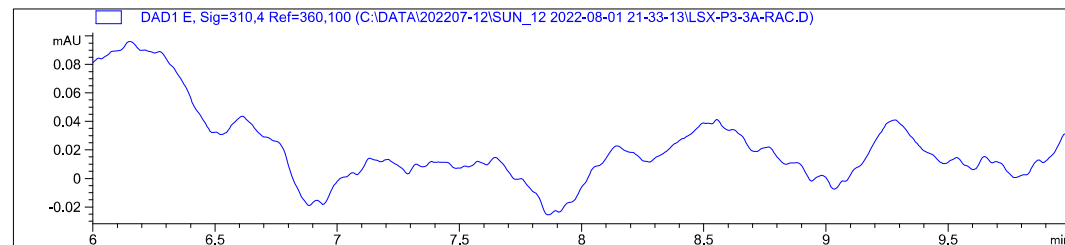

```

=====
                          Area Percent Report
=====

Sorted By      :      Signal
Multiplier     :      1.0000
Dilution       :      1.0000
Use Multiplier & Dilution Factor with ISTDs

Signal 1: DAD1 A, Sig=210,4 Ref=360,100

Signal 2: DAD1 B, Sig=230,4 Ref=360,100

Peak RetTime Type  Width   Area      Height   Area
#   [min]         [min] [mAU*s]  [mAU]    %
-----|-----|-----|-----|-----|-----|
  1   6.886 MM    0.1945 2248.17627 192.65378 50.5702
  2   7.900 MM    0.2246 2197.47681 163.04517 49.4298

Totals :                               4445.65308 355.69894

Signal 3: DAD1 C, Sig=254,4 Ref=360,100

Signal 4: DAD1 D, Sig=280,4 Ref=360,100

Signal 5: DAD1 E, Sig=310,4 Ref=360,100

=====
*** End of Report ***
  
```

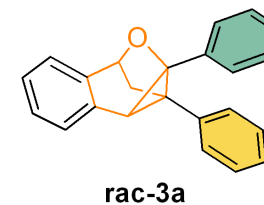



```

=====
Acq. Operator   :                               Seq. Line :    2
Acq. Instrument : Instrument 1                 Location  :   41
Injection Date  : 12/12/2021 4:31:25 am      Inj       :    1
                                                Inj Volume: 5.000 µl

Acq. Method    : C:\Chem32\1\DATA\SUN_12 2021-12-12 20-18-38\IC-02-30.M
Last changed   :                               (modified after loading)

Analysis Method : C:\Users\Public\Documents\ChemStation\1\Data\SUN\SUN 2024-03-13 00-13-49\AD-01
                : -30-0.5.M (Sequence Method)
Last changed   : 13/3/2024 6:43:39 pm by SYSTEM
                : (modified after loading)

Additional Info : Peak(s) manually integrated
    
```

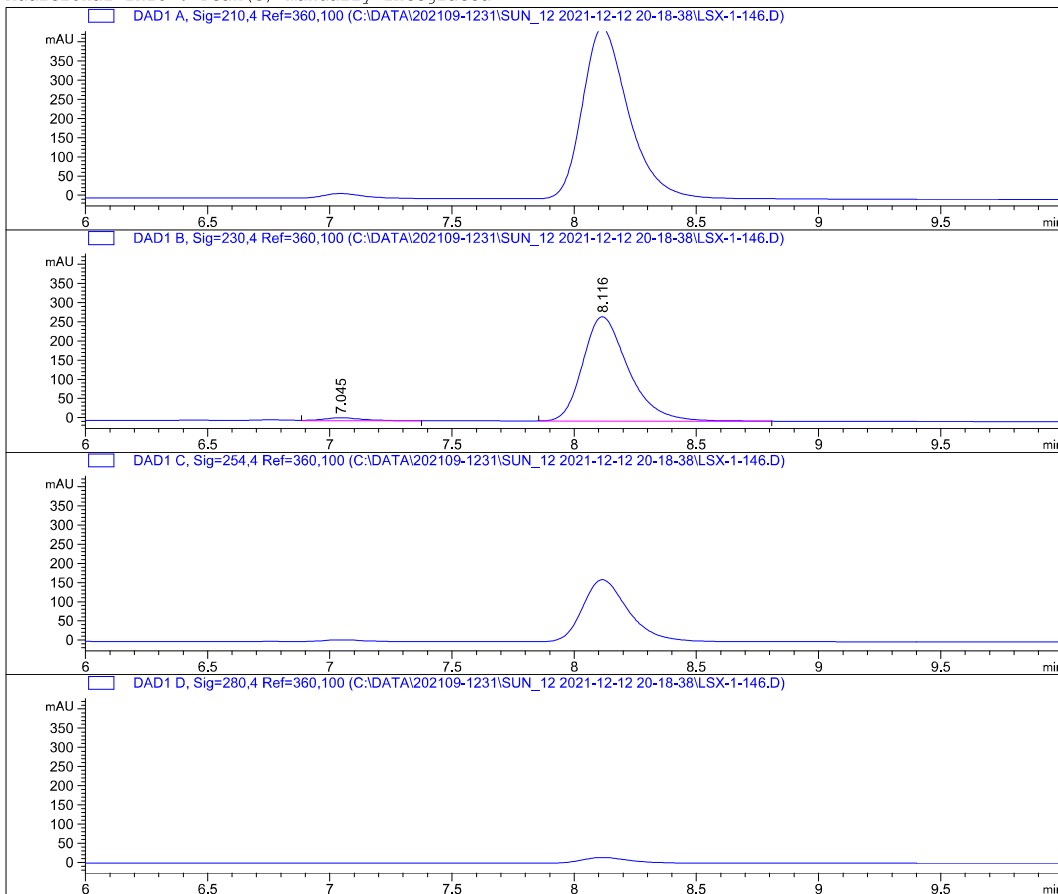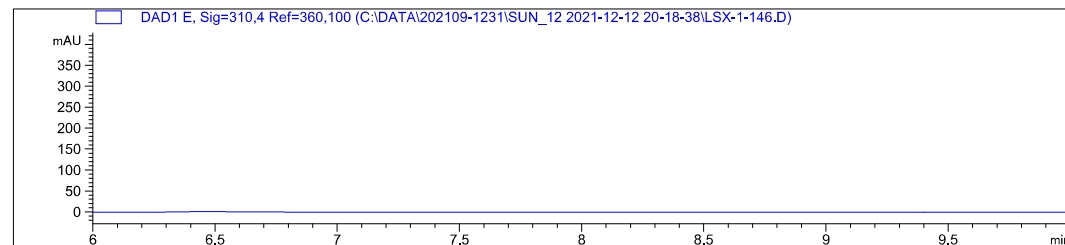

```

=====
Area Percent Report
=====

Sorted By      :      Signal
Multiplier     :      1.0000
Dilution       :      1.0000
Use Multiplier & Dilution Factor with ISTDs
    
```

Signal 1: DAD1 A, Sig=210,4 Ref=360,100

Signal 2: DAD1 B, Sig=230,4 Ref=360,100

| Peak # | RetTime [min] | Type | Width [min] | Area [mAU*s] | Height [mAU] | Area %  |
|--------|---------------|------|-------------|--------------|--------------|---------|
| 1      | 7.045         | VB   | 0.1691      | 79.63106     | 7.19634      | 2.2089  |
| 2      | 8.116         | BB   | 0.1972      | 3525.37769   | 272.00723    | 97.7911 |

Totals : 3605.00874 279.20358

Signal 3: DAD1 C, Sig=254,4 Ref=360,100

Signal 4: DAD1 D, Sig=280,4 Ref=360,100

Signal 5: DAD1 E, Sig=310,4 Ref=360,100

```

=====
*** End of Report ***
    
```

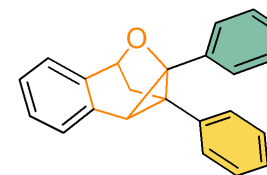

**3a**

```

=====
Acq. Operator   :                               Seq. Line :    6
Acq. Instrument : Instrument 1                   Location  :   45
Injection Date  : 24/7/2022 4:06:57 am          Inj       :    1
                                                Inj Volume: 5.000 µl

Acq. Method    : C:\Chem32\1\DATA\SUN_12 2022-07-24 16-49-13\IC-02-30.M
Last changed   :                               (modified after loading)

Analysis Method: C:\Users\Public\Documents\ChemStation\1\Data\SUN\SUN 2024-03-13 17-26-47\OD-00
                -20.M (Sequence Method)
Last changed   : 13/3/2024 10:28:03 pm by SYSTEM
                (modified after loading)

Additional Info: Peak(s) manually integrated
  
```

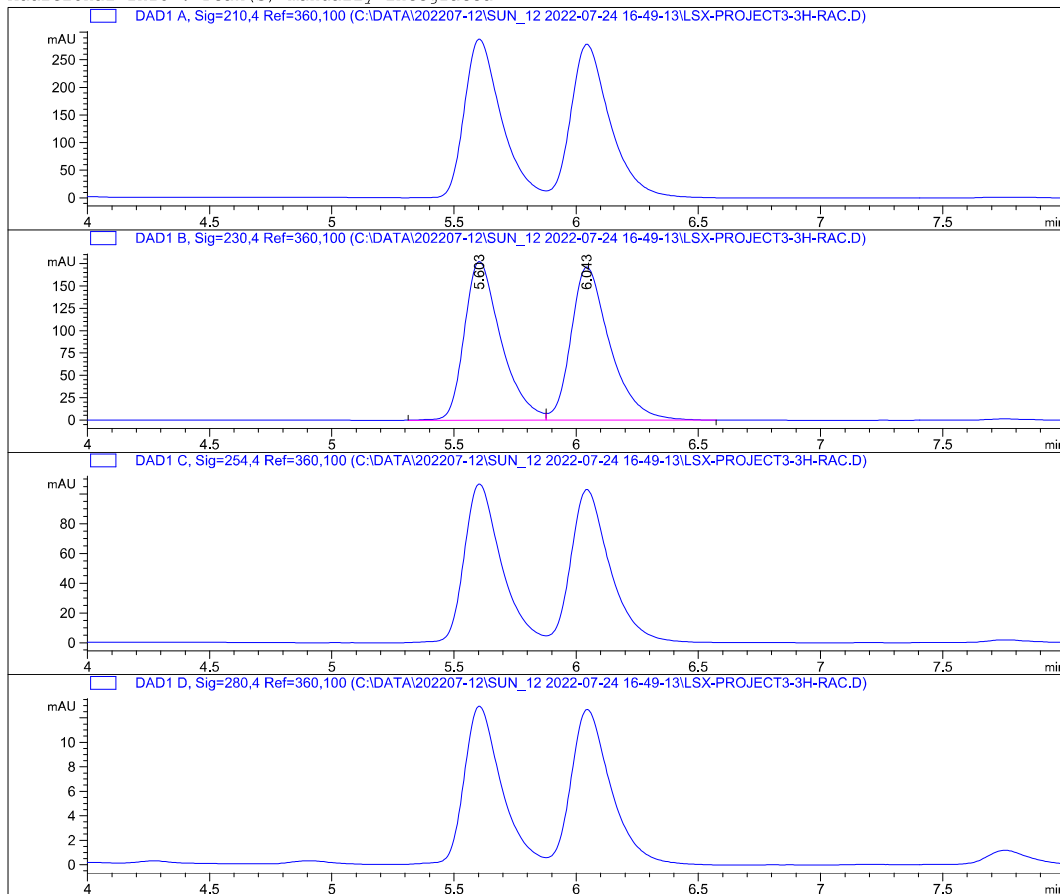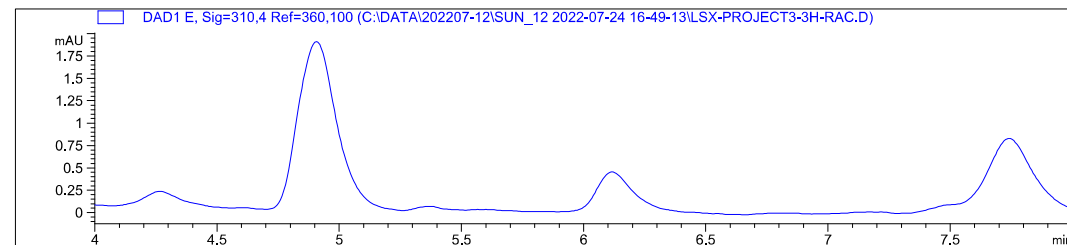

=====  
 Area Percent Report  
 =====

Sorted By : Signal  
 Multiplier : 1.0000  
 Dilution : 1.0000  
 Use Multiplier & Dilution Factor with ISTDs

Signal 1: DAD1 A, Sig=210,4 Ref=360,100

Signal 2: DAD1 B, Sig=230,4 Ref=360,100

| Peak # | RetTime [min] | Type | Width [min] | Area [mAU*s] | Height [mAU] | Area %  |
|--------|---------------|------|-------------|--------------|--------------|---------|
| 1      | 5.603         | BV   | 0.1560      | 1857.32861   | 177.67133    | 49.4033 |
| 2      | 6.043         | VB   | 0.1653      | 1902.19141   | 171.62758    | 50.5967 |

Totals : 3759.52002 349.29890

Signal 3: DAD1 C, Sig=254,4 Ref=360,100

Signal 4: DAD1 D, Sig=280,4 Ref=360,100

Signal 5: DAD1 E, Sig=310,4 Ref=360,100

=====  
 \*\*\* End of Report \*\*\*

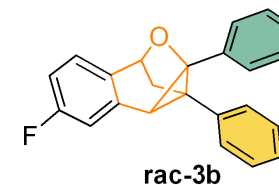

```

=====
Acq. Operator   :                               Seq. Line :   18
Acq. Instrument : Instrument 1                   Location  :   41
Injection Date  : 2/1/2022 6:09:32 am           Inj       :    1
                                                Inj Volume: 5.000 µl

Acq. Method    : C:\Chem32\1\DATA\SUN_12 2022-01-02 17-11-59\IC-02-30.M
Last changed   :                               (modified after loading)

Analysis Method: C:\Users\Public\Documents\ChemStation\1\Data\SUN\SUN 2024-03-13 17-26-47\OD-00
                                                -20.M (Sequence Method)
Last changed   : 13/3/2024 10:29:02 pm by SYSTEM
                                                (modified after loading)

Additional Info: Peak(s) manually integrated
  
```

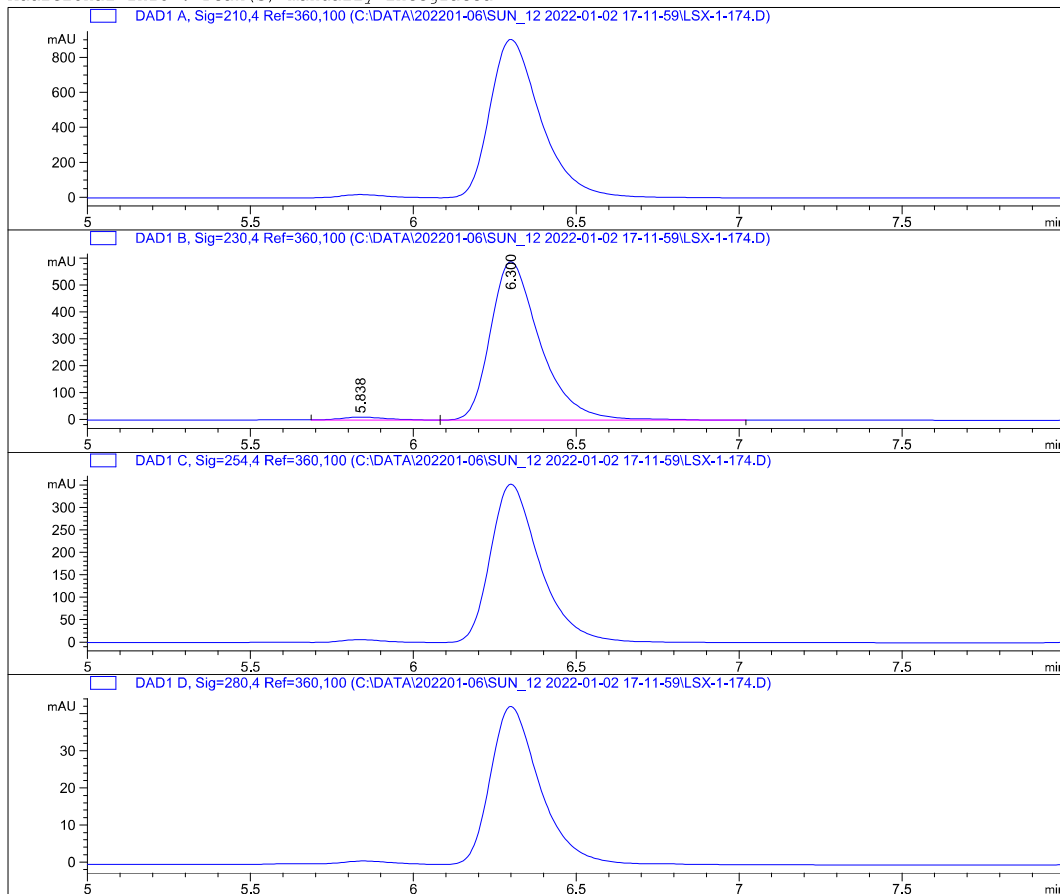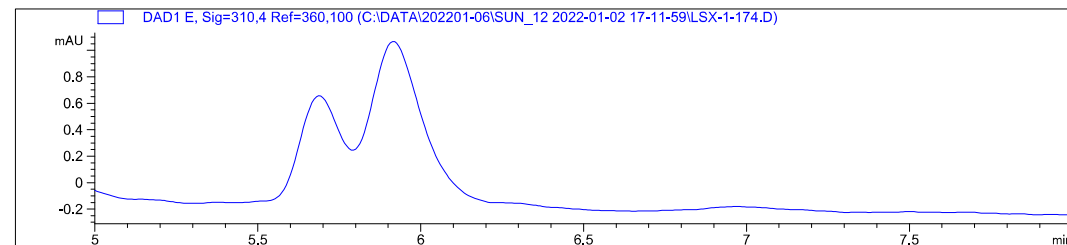

```

=====
Area Percent Report
=====

Sorted By      :      Signal
Multiplier    :      1.0000
Dilution      :      1.0000
Use Multiplier & Dilution Factor with ISTDs
  
```

Signal 1: DAD1 A, Sig=210,4 Ref=360,100

Signal 2: DAD1 B, Sig=230,4 Ref=360,100

| Peak # | RetTime [min] | Type | Width [min] | Area [mAU*s] | Height [mAU] | Area %  |
|--------|---------------|------|-------------|--------------|--------------|---------|
| 1      | 5.838         | VV   | 0.1522      | 111.83696    | 11.04016     | 1.7620  |
| 2      | 6.300         | VB   | 0.1594      | 6235.43604   | 589.52393    | 98.2380 |

Totals : 6347.27299 600.56408

Signal 3: DAD1 C, Sig=254,4 Ref=360,100

Signal 4: DAD1 D, Sig=280,4 Ref=360,100

Signal 5: DAD1 E, Sig=310,4 Ref=360,100

```

=====
*** End of Report ***
  
```

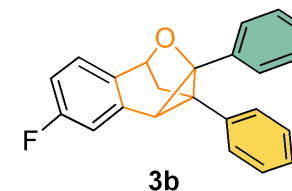

3b

```

=====
Acq. Operator   :                               Seq. Line :    7
Acq. Instrument : Instrument 1                   Location  :   46
Injection Date  : 24/7/2022 4:37:58 am          Inj       :    1
                                                    Inj Volume: 5.000 µl

Acq. Method    : C:\Chem32\1\DATA\SUN_12 2022-07-24 16-49-13\IC-02-30.M
Last changed   :                               (modified after loading)

Analysis Method: C:\Users\Public\Documents\ChemStation\1\Data\SUN\SUN 2024-03-13 17-26-47\OD-00
                -20.M (Sequence Method)
Last changed   : 13/3/2024 10:32:00 pm by SYSTEM
                (modified after loading)

Additional Info : Peak(s) manually integrated
  
```

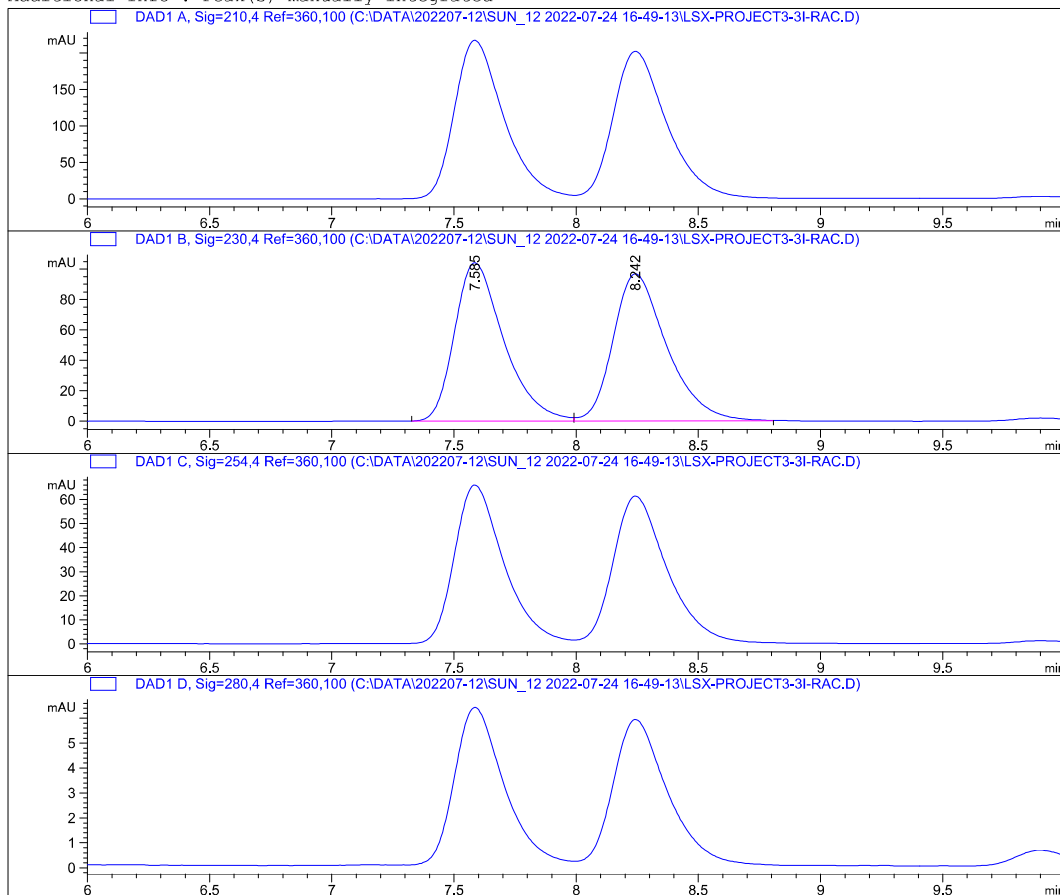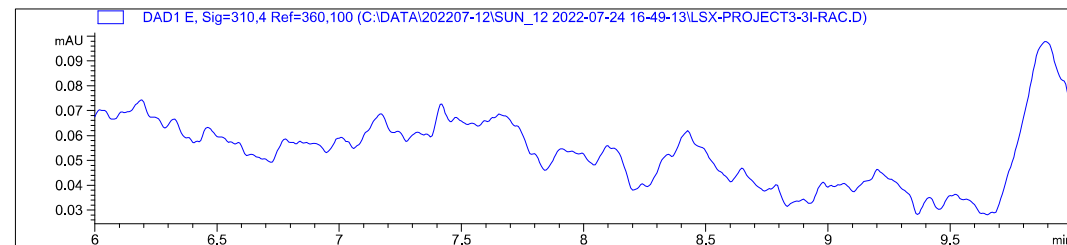

```

=====
                          Area Percent Report
=====

Sorted By      :      Signal
Multiplier    :      1.0000
Dilution      :      1.0000
Use Multiplier & Dilution Factor with ISTDs

Signal 1: DAD1 A, Sig=210,4 Ref=360,100

Signal 2: DAD1 B, Sig=230,4 Ref=360,100

Peak RetTime Type Width Area Height Area
# [min] [min] [mAU*s] [mAU] %
-----|-----|-----|-----|-----|-----
1 7.585 BV 0.2117 1462.05786 104.22356 49.6991
2 8.242 VB 0.2283 1479.75928 96.82571 50.3009

Totals :                2941.81714 201.04926

Signal 3: DAD1 C, Sig=254,4 Ref=360,100

Signal 4: DAD1 D, Sig=280,4 Ref=360,100

Signal 5: DAD1 E, Sig=310,4 Ref=360,100

=====
*** End of Report ***
  
```

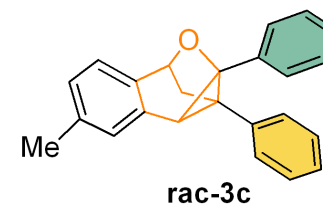

```

=====
Acq. Operator   :                               Seq. Line :    4
Acq. Instrument : Instrument 1                   Location  :   43
Injection Date  : 21/1/2022 11:56:27 pm        Inj       :    1
                                                Inj Volume: 5.000 µl

Acq. Method    : C:\Chem32\1\DATA\SUN_12 2022-01-22 14-41-42\IC-02-30.M
Last changed   :                              

Analysis Method: C:\Users\Public\Documents\ChemStation\1\Data\SUN\SUN 2024-03-13 17-26-47\OD-00
                -20.M (Sequence Method)
Last changed   : 13/3/2024 10:32:00 pm by SYSTEM
                (modified after loading)

Additional Info : Peak(s) manually integrated
  
```

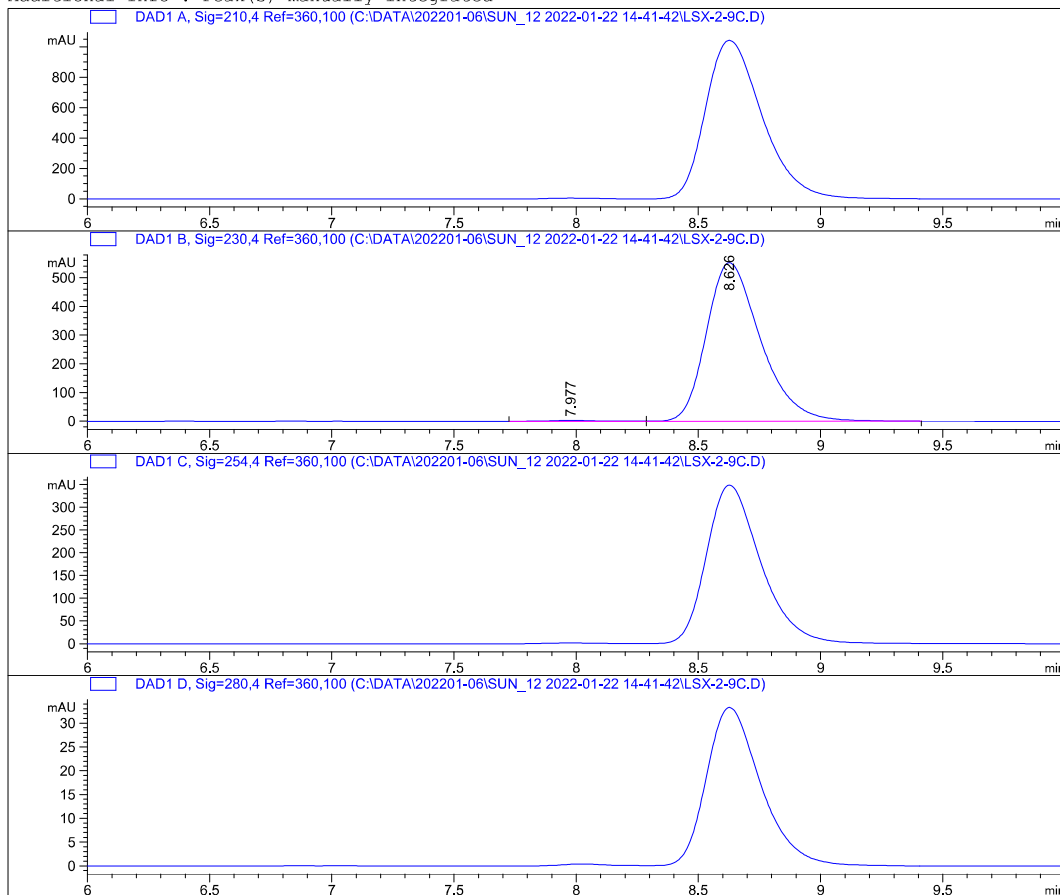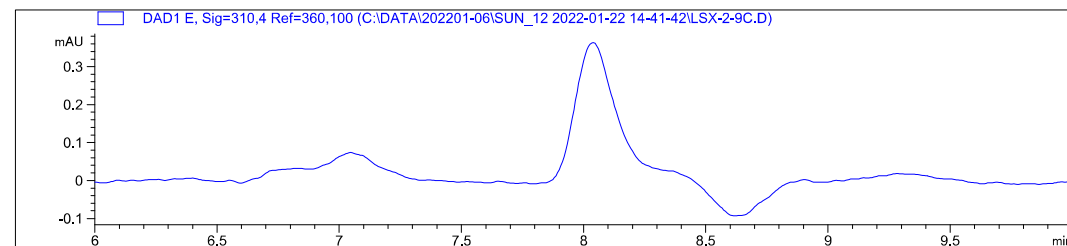

=====  
 Area Percent Report  
 =====

Sorted By : Signal  
 Multiplier : 1.0000  
 Dilution : 1.0000  
 Use Multiplier & Dilution Factor with ISTDs

Signal 1: DAD1 A, Sig=210,4 Ref=360,100

Signal 2: DAD1 B, Sig=230,4 Ref=360,100

| Peak # | RetTime [min] | Type | Width [min] | Area [mAU*s] | Height [mAU] | Area %  |
|--------|---------------|------|-------------|--------------|--------------|---------|
| 1      | 7.977         | BV   | 0.2237      | 41.06731     | 2.79093      | 0.4792  |
| 2      | 8.626         | VB   | 0.2339      | 8529.00488   | 553.08282    | 99.5208 |

Totals : 8570.07219 555.87375

Signal 3: DAD1 C, Sig=254,4 Ref=360,100

Signal 4: DAD1 D, Sig=280,4 Ref=360,100

Signal 5: DAD1 E, Sig=310,4 Ref=360,100

=====  
 \*\*\* End of Report \*\*\*

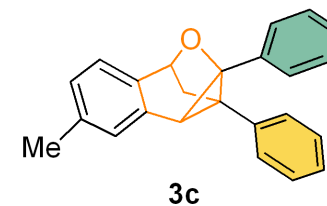

```

=====
Acq. Operator   :                               Seq. Line :    8
Acq. Instrument : Instrument 1                   Location   :   47
Injection Date  : 24/7/2022 5:08:58 am         Inj        :    1
                                                Inj Volume : 5.000 µl

Acq. Method    : C:\Chem32\1\DATA\SUN_12 2022-07-24 16-49-13\IC-02-30.M
Last changed   :                               (modified after loading)

Analysis Method : C:\Users\Public\Documents\ChemStation\1\Data\SUN\SUN 2024-03-13 17-26-47\OD-00
                : -20.M (Sequence Method)
Last changed   : 13/3/2024 10:34:10 pm by SYSTEM
                : (modified after loading)

Additional Info : Peak(s) manually integrated
  
```

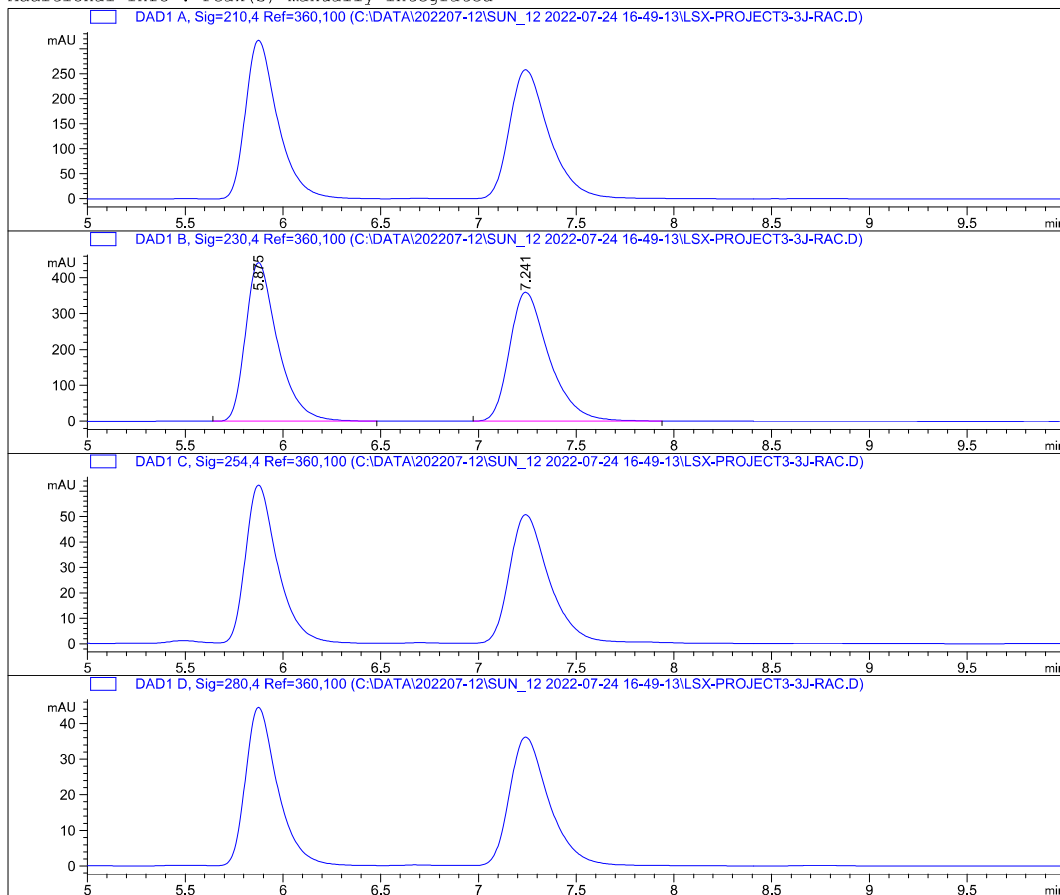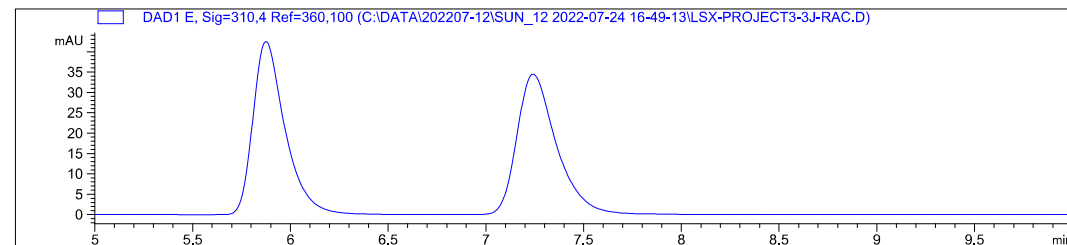

=====  
 Area Percent Report  
 =====

```

Sorted By      :      Signal
Multiplier    :      1.0000
Dilution      :      1.0000
Use Multiplier & Dilution Factor with ISTDs
  
```

Signal 1: DAD1 A, Sig=210,4 Ref=360,100

Signal 2: DAD1 B, Sig=230,4 Ref=360,100

| Peak # | RetTime [min] | Type | Width [min] | Area [mAU*s] | Height [mAU] | Area %  |
|--------|---------------|------|-------------|--------------|--------------|---------|
| 1      | 5.875         | VB   | 0.1710      | 5037.94092   | 441.99258    | 49.9651 |
| 2      | 7.241         | BB   | 0.2118      | 5044.97656   | 359.28168    | 50.0349 |

Totals :                    1.00829e4    801.27426

Signal 3: DAD1 C, Sig=254,4 Ref=360,100

Signal 4: DAD1 D, Sig=280,4 Ref=360,100

Signal 5: DAD1 E, Sig=310,4 Ref=360,100

=====  
 \*\*\* End of Report \*\*\*

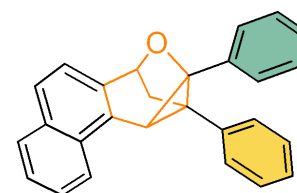

rac-3d

```

=====
Acq. Operator   :                               Seq. Line :   19
Acq. Instrument : Instrument 1                  Location  :   42
Injection Date  : 2/1/2022 6:40:32 am          Inj       :    1
                                                Inj Volume: 5.000 µl

Acq. Method    : C:\Chem32\1\DATA\SUN_12 2022-01-02 17-11-59\IC-02-30.M
Last changed   :                              

Analysis Method : C:\Users\Public\Documents\ChemStation\1\Data\SUN\SUN 2024-03-13 17-26-47\OD-00
                : -20.M (Sequence Method)
Last changed   : 13/3/2024 10:37:58 pm by SYSTEM
                : (modified after loading)

Additional Info : Peak(s) manually integrated
  
```

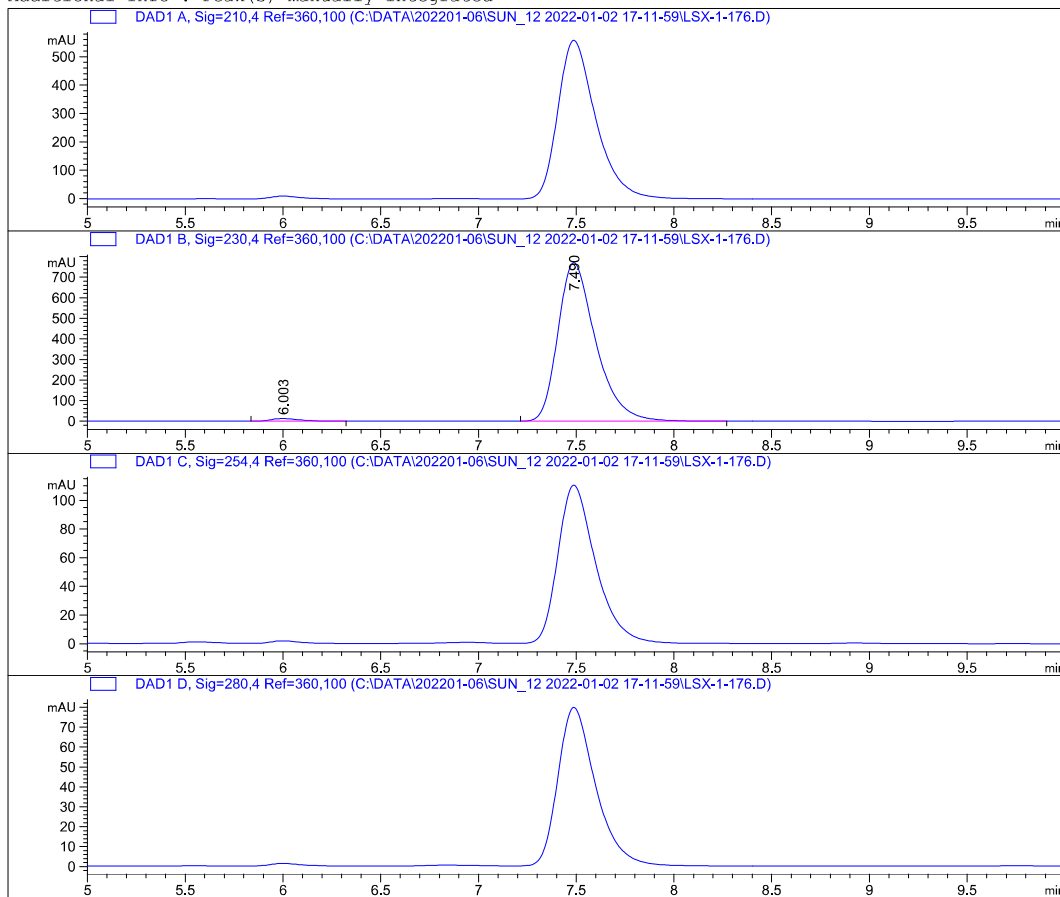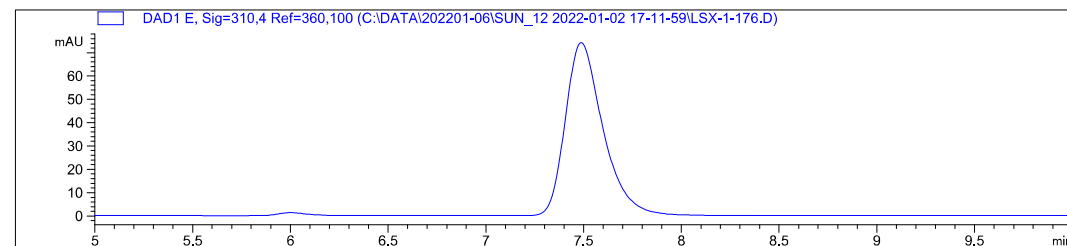

```

=====
                          Area Percent Report
=====

Sorted By      :      Signal
Multiplier     :      1.0000
Dilution       :      1.0000
Use Multiplier & Dilution Factor with ISTDs
  
```

Signal 1: DAD1 A, Sig=210,4 Ref=360,100

Signal 2: DAD1 B, Sig=230,4 Ref=360,100

| Peak # | RetTime [min] | Type | Width [min] | Area [mAU*s] | Height [mAU] | Area %  |
|--------|---------------|------|-------------|--------------|--------------|---------|
| 1      | 6.003         | BB   | 0.1590      | 135.40482    | 12.83902     | 1.2870  |
| 2      | 7.490         | BB   | 0.2032      | 1.03853e4    | 770.76685    | 98.7130 |

Totals : 1.05207e4 783.60586

Signal 3: DAD1 C, Sig=254,4 Ref=360,100

Signal 4: DAD1 D, Sig=280,4 Ref=360,100

Signal 5: DAD1 E, Sig=310,4 Ref=360,100

```

=====
*** End of Report ***
  
```

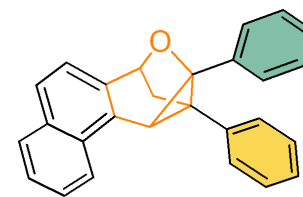

3d

```

=====
Acq. Operator   :                               Seq. Line :    7
Acq. Instrument : Instrument 1                   Location  :   44
Injection Date  : 1/8/2022 9:01:54 am          Inj       :    1
                                                Inj Volume: 5.000 µl

Acq. Method    : C:\Chem32\1\DATA\SUN_12 2022-08-01 21-33-13\IC-02-30.M
Last changed   :                               (modified after loading)

Analysis Method: C:\Users\Public\Documents\ChemStation\1\Data\SUN\SUN 2024-03-13 00-13-49\AD-01
                                                -30-0.5.M (Sequence Method)
Last changed   : 13/3/2024 6:50:29 pm by SYSTEM
                                                (modified after loading)

Additional Info: Peak(s) manually integrated
  
```

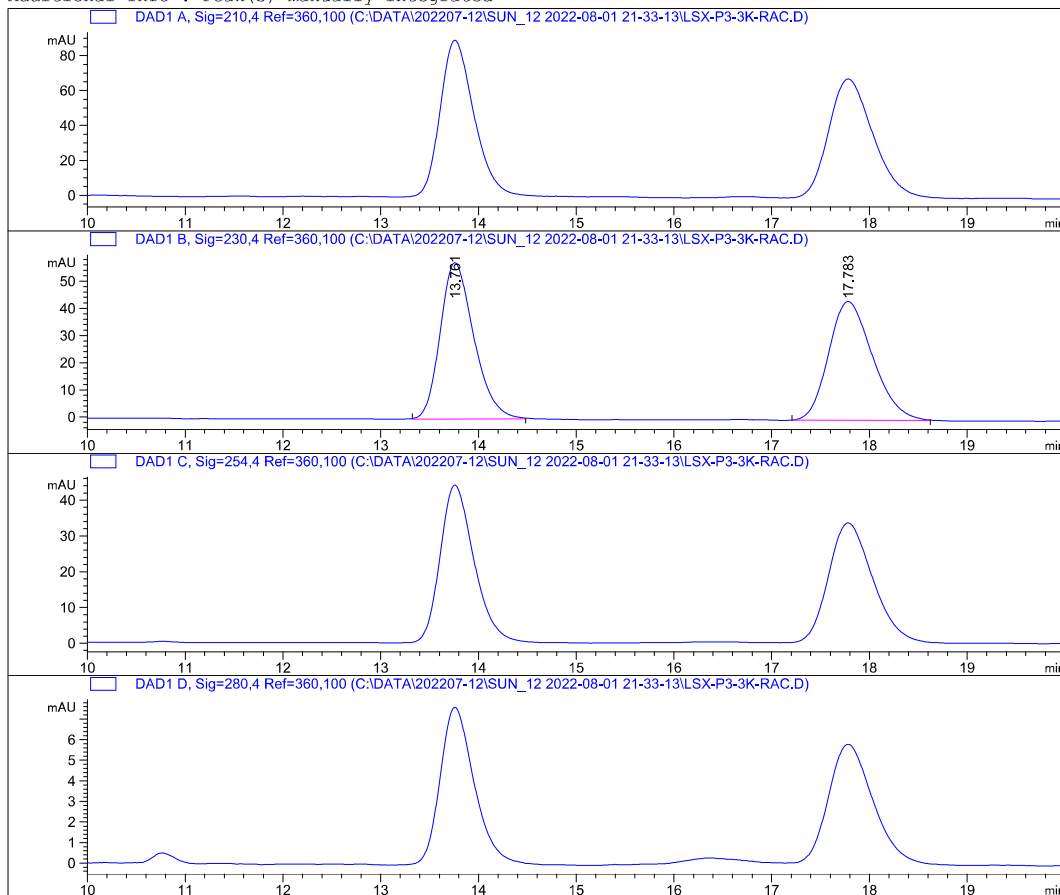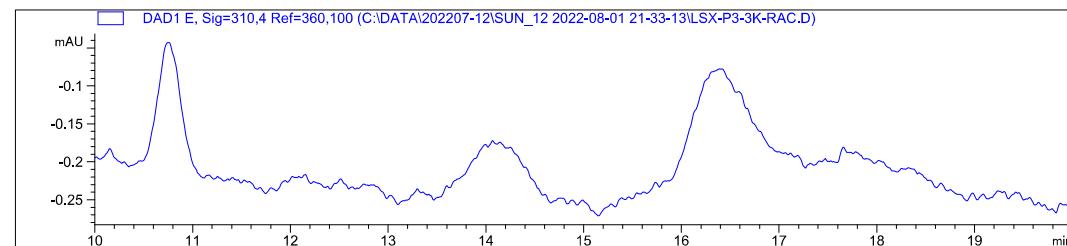

```

=====
                          Area Percent Report
=====

Sorted By      :      Signal
Multiplier    :      1.0000
Dilution      :      1.0000
Use Multiplier & Dilution Factor with ISTDs

Signal 1: DAD1 A, Sig=210,4 Ref=360,100

Signal 2: DAD1 B, Sig=230,4 Ref=360,100

Peak RetTime Type Width Area Height Area
# [min] ----- [min] [mAU*s] [mAU] %
-----|-----|-----|-----|-----|-----|
1 13.761 BB 0.3678 1380.30212 57.54430 50.2088
2 17.783 BB 0.4792 1368.82336 43.72640 49.7912

Totals :                               2749.12549 101.27070

Signal 3: DAD1 C, Sig=254,4 Ref=360,100

Signal 4: DAD1 D, Sig=280,4 Ref=360,100

Signal 5: DAD1 E, Sig=310,4 Ref=360,100

=====
*** End of Report ***
  
```

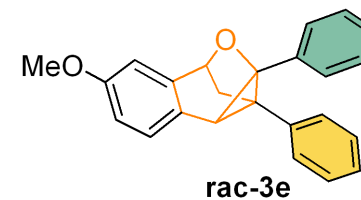



```
=====
Acq. Operator   :                               Seq. Line :    5
Acq. Instrument : Instrument 1                   Location  :   44
Injection Date  : 22/1/2022 12:27:26 am         Inj       :    1
                                                Inj Volume: 5.000 µl

Acq. Method    : C:\Chem32\1\DATA\SUN_12 2022-01-22 14-41-42\IC-02-30.M
Last changed   :                               (modified after loading)
Analysis Method: C:\Users\Public\Documents\ChemStation\1\Data\SUN\SUN 2024-03-13 17-26-47\OD-00
                                                -20.M (Sequence Method)
Last changed   : 13/3/2024 10:39:15 pm by SYSTEM
                                                (modified after loading)
Additional Info : Peak(s) manually integrated
```

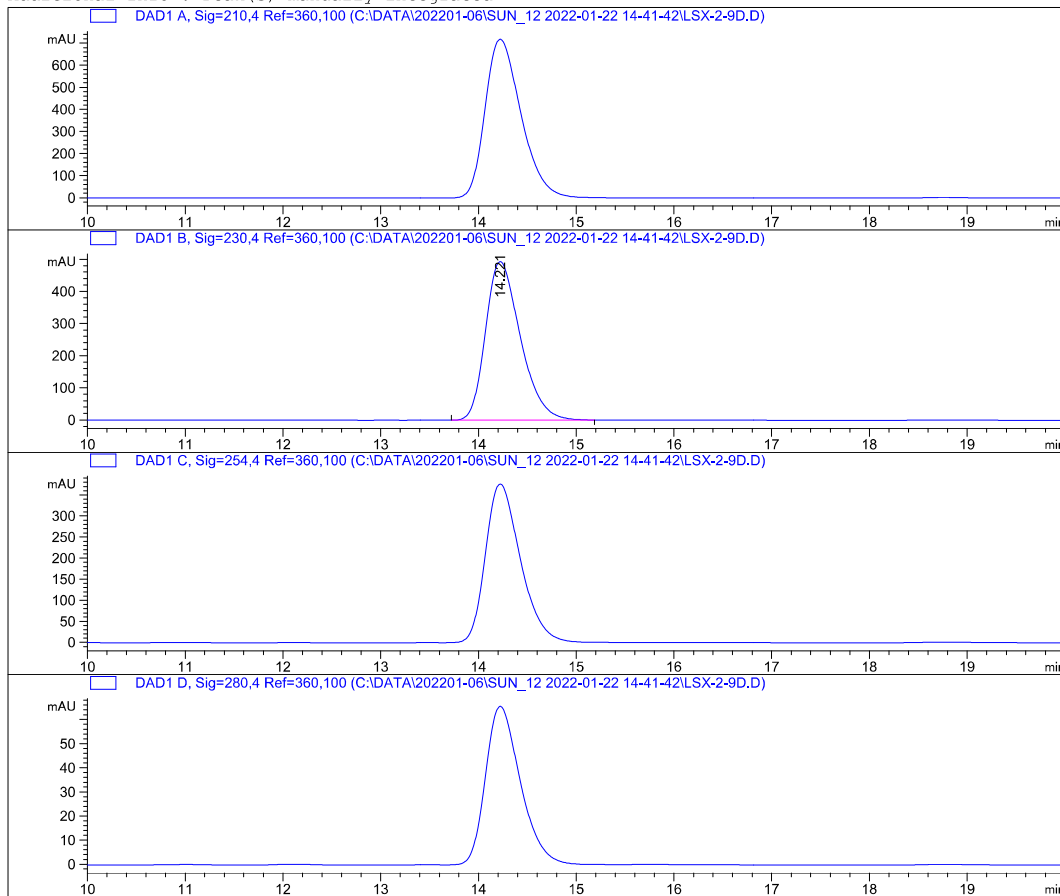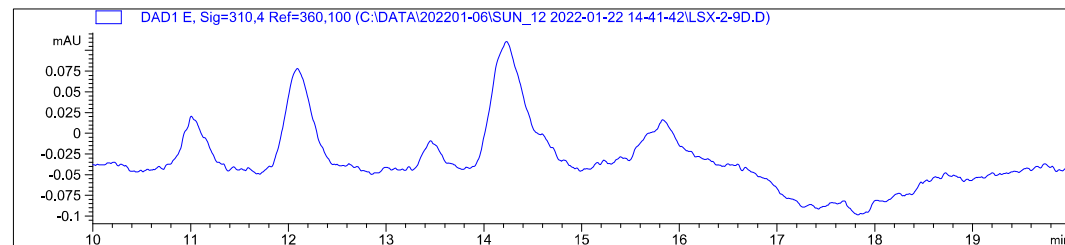

```
=====
                          Area Percent Report
=====
```

| Sorted By                                   | :             | Signal |             |              |              |          |
|---------------------------------------------|---------------|--------|-------------|--------------|--------------|----------|
| Multiplier                                  | :             | 1.0000 |             |              |              |          |
| Dilution                                    | :             | 1.0000 |             |              |              |          |
| Use Multiplier & Dilution Factor with ISTDs |               |        |             |              |              |          |
| Signal 1: DAD1 A, Sig=210,4 Ref=360,100     |               |        |             |              |              |          |
| Signal 2: DAD1 B, Sig=230,4 Ref=360,100     |               |        |             |              |              |          |
| Peak #                                      | RetTime [min] | Type   | Width [min] | Area [mAU*s] | Height [mAU] | Area %   |
| 1                                           | 14.221        | BB     | 0.3809      | 1.22079e4    | 493.01736    | 100.0000 |
| Totals :                                    |               |        |             | 1.22079e4    | 493.01736    |          |
| Signal 3: DAD1 C, Sig=254,4 Ref=360,100     |               |        |             |              |              |          |
| Signal 4: DAD1 D, Sig=280,4 Ref=360,100     |               |        |             |              |              |          |
| Signal 5: DAD1 E, Sig=310,4 Ref=360,100     |               |        |             |              |              |          |
| *** End of Report ***                       |               |        |             |              |              |          |

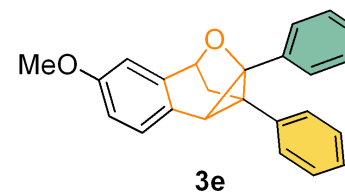

```
=====
Acq. Operator   :                               Seq. Line :    2
Acq. Instrument : Instrument 1                 Location  :    41
Injection Date  : 24/7/2022 2:03:03 am         Inj       :    1
                                           Inj Volume: 5.000 µl
Acq. Method     : C:\Chem32\1\DATA\SUN_12 2022-07-24 16-49-13\IC-02-30.M
Last changed    :                               (modified after loading)
Analysis Method : C:\Users\Public\Documents\ChemStation\1\Data\SUN\SUN 2024-03-13 00-13-49\AD-01
                                           -30-0.5.M (Sequence Method)
Last changed    : 13/3/2024 6:54:01 pm by SYSTEM
                                           (modified after loading)
Additional Info : Peak(s) manually integrated
```

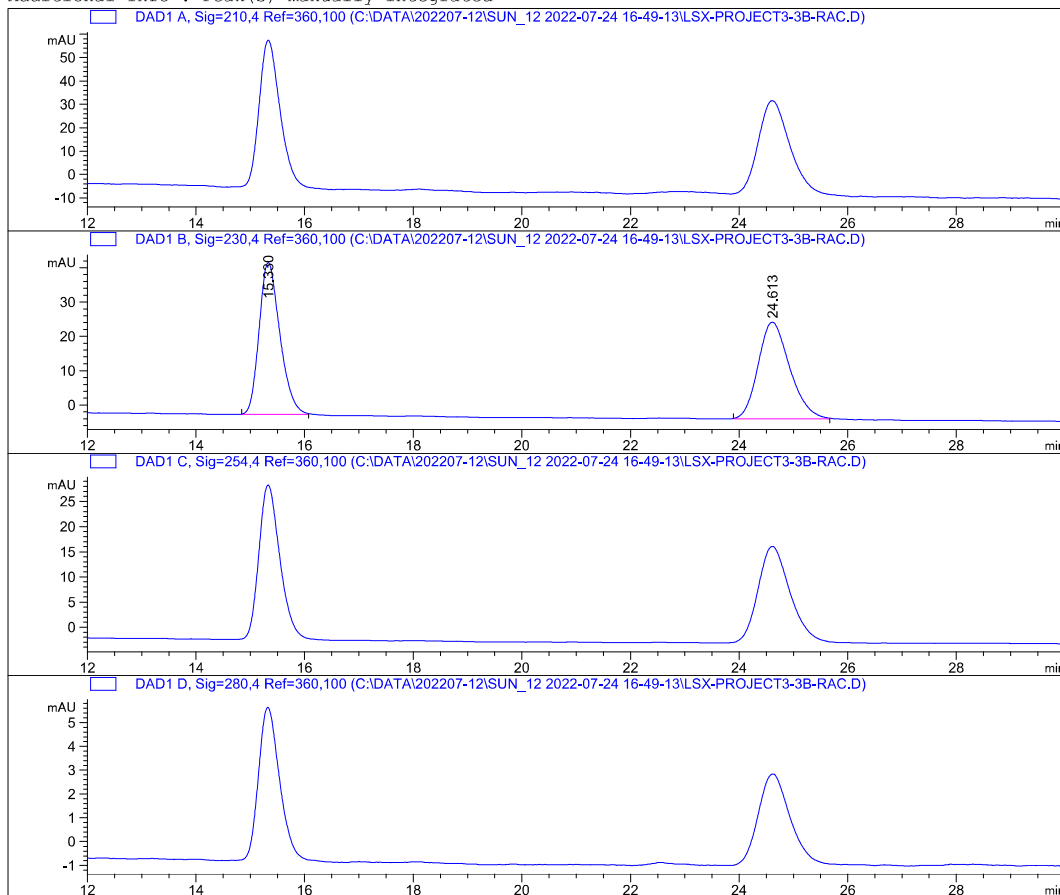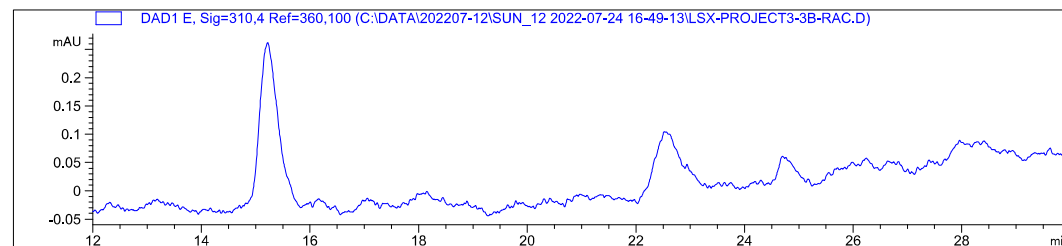

=====  
Area Percent Report  
=====

```
Sorted By      :      Signal
Multiplier     :      1.0000
Dilution       :      1.0000
Use Multiplier & Dilution Factor with ISTDs
```

```
Signal 1: DAD1 A, Sig=210,4 Ref=360,100

Signal 2: DAD1 B, Sig=230,4 Ref=360,100
```

| Peak #   | RetTime [min] | Type | Width [min] | Area [mAU*s] | Height [mAU] | Area %  |
|----------|---------------|------|-------------|--------------|--------------|---------|
| 1        | 15.330        | BB   | 0.4085      | 1177.19836   | 44.22970     | 50.8037 |
| 2        | 24.613        | BB   | 0.6081      | 1139.95337   | 28.17158     | 49.1963 |
| Totals : |               |      |             | 2317.15173   | 72.40128     |         |

```
Signal 3: DAD1 C, Sig=254,4 Ref=360,100

Signal 4: DAD1 D, Sig=280,4 Ref=360,100

Signal 5: DAD1 E, Sig=310,4 Ref=360,100
```

=====  
\*\*\* End of Report \*\*\*

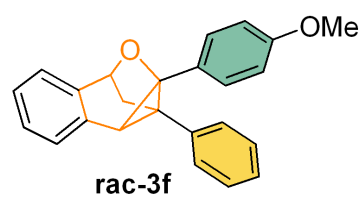

```

=====
Acq. Operator   :                               Seq. Line :    3
Acq. Instrument : Instrument 1                   Location  :   42
Injection Date  : 21/1/2022 11:25:27 pm        Inj       :    1
                                                Inj Volume: 5.000 µl

Acq. Method    : C:\Chem32\1\DATA\SUN_12 2022-01-22 14-41-42\IC-02-30.M
Last changed   :                               (modified after loading)

Analysis Method: C:\Users\Public\Documents\ChemStation\1\Data\SUN\SUN 2024-03-13 00-13-49\AD-01
-30-0.5.M (Sequence Method)
Last changed   : 13/3/2024 6:54:01 pm by SYSTEM
                                                (modified after loading)

Additional Info : Peak(s) manually integrated
  
```

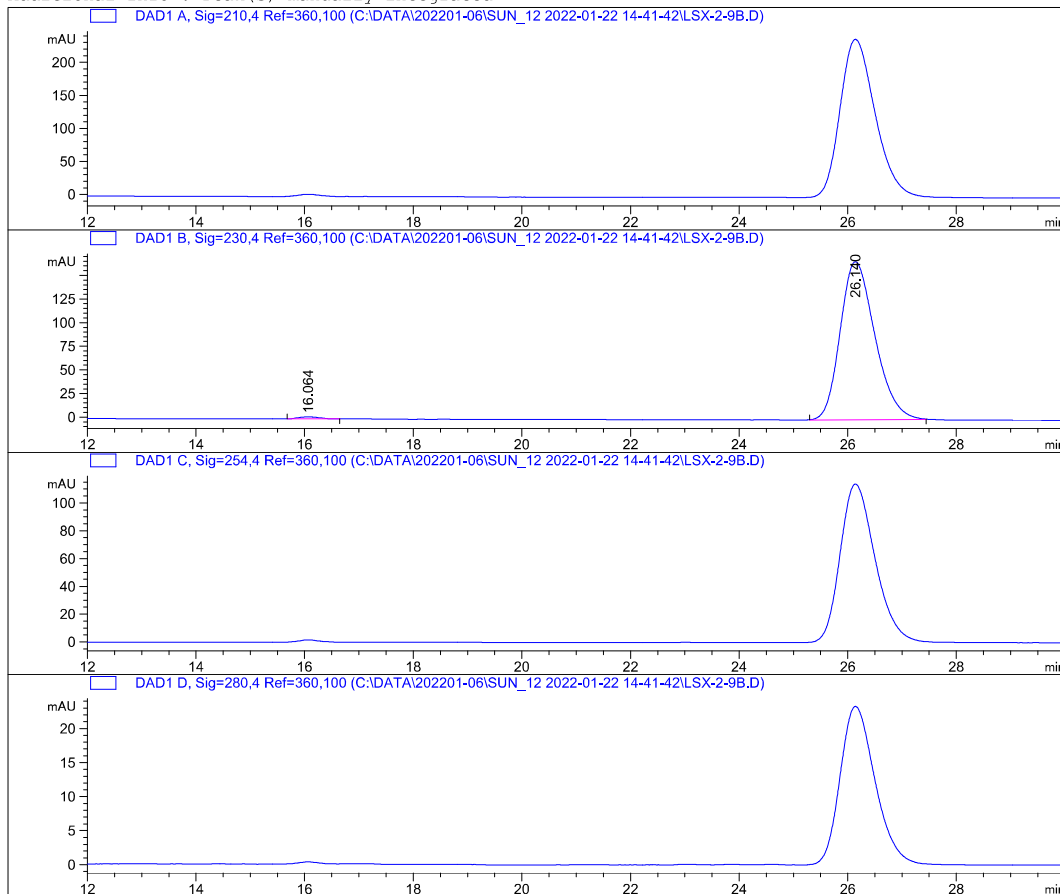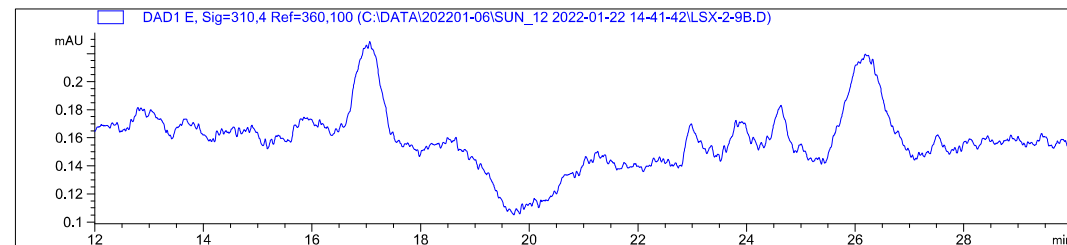

=====  
 Area Percent Report  
 =====

Sorted By : Signal  
 Multiplier : 1.0000  
 Dilution : 1.0000  
 Use Multiplier & Dilution Factor with ISTDs

Signal 1: DAD1 A, Sig=210,4 Ref=360,100

Signal 2: DAD1 B, Sig=230,4 Ref=360,100

| Peak # | RetTime [min] | Type | Width [min] | Area [mAU*s] | Height [mAU] | Area %  |
|--------|---------------|------|-------------|--------------|--------------|---------|
| 1      | 16.064        | BB   | 0.3842      | 54.60185     | 2.13649      | 0.7303  |
| 2      | 26.140        | BB   | 0.6878      | 7422.14063   | 167.23262    | 99.2697 |

Totals : 7476.74247 169.36911

Signal 3: DAD1 C, Sig=254,4 Ref=360,100

Signal 4: DAD1 D, Sig=280,4 Ref=360,100

Signal 5: DAD1 E, Sig=310,4 Ref=360,100

=====  
 \*\*\* End of Report \*\*\*

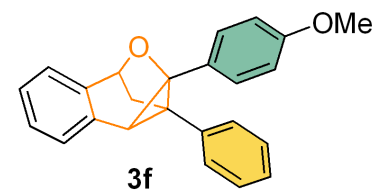

```

=====
Acq. Operator   :                               Seq. Line :    6
Acq. Instrument : Instrument 1                   Location  :   43
Injection Date  : 1/8/2022 8:30:54 am           Inj       :    1
                                                Inj Volume: 5.000 µl
Different Inj Volume from Sample Entry! Actual Inj Volume : 3.000 µl
Acq. Method    : C:\Chem32\1\DATA\SUN_12 2022-08-01 21-33-13\IC-02-30.M
Last changed   :                               (modified after loading)
Analysis Method : C:\Users\Public\Documents\ChemStation\1\Data\SUN\SUN 2024-03-13 00-13-49\AD-01
                : -30-0.5.M (Sequence Method)
Last changed   : 13/3/2024 6:49:02 pm by SYSTEM (modified after loading)
Additional Info : Peak(s) manually integrated
  
```

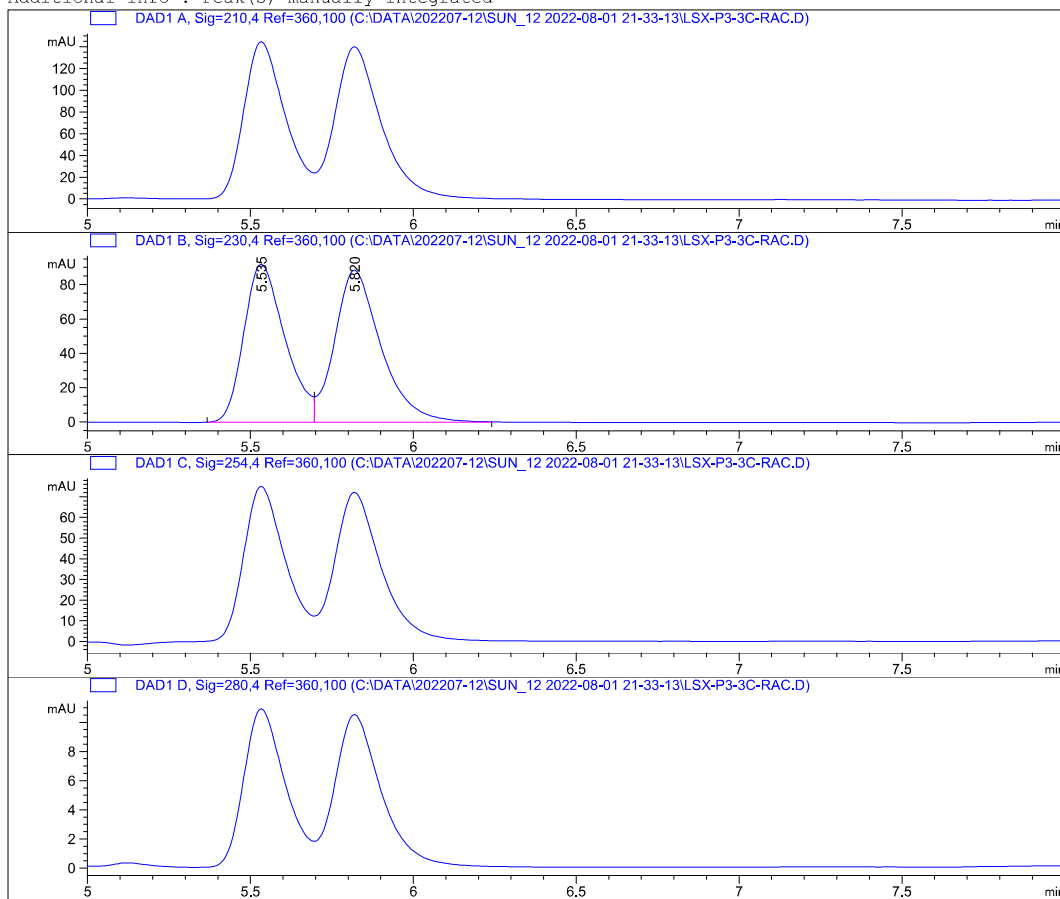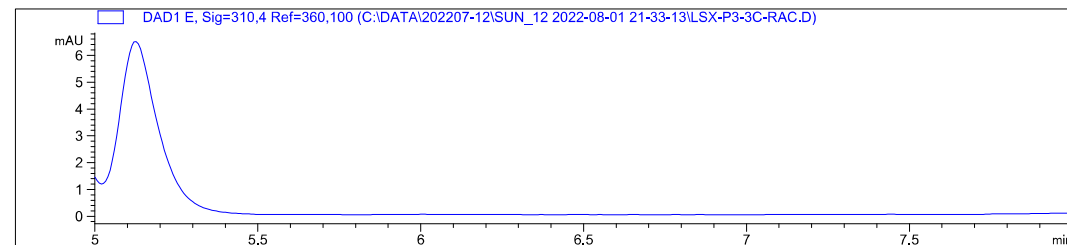

```

=====
                          Area Percent Report
=====
Sorted By      :      Signal
Multiplier    :      1.0000
Dilution      :      1.0000
Use Multiplier & Dilution Factor with ISTDs

Signal 1: DAD1 A, Sig=210,4 Ref=360,100

Signal 2: DAD1 B, Sig=230,4 Ref=360,100

Peak RetTime Type  Width   Area      Height   Area
#   [min]          [min] [mAU*s]  [mAU]    %
-----|-----|-----|-----|-----|-----|
  1   5.535  BV    0.1323  808.85852  92.28972  47.9678
  2   5.820  VB    0.1474  877.39423  88.69310  52.0322

Totals :                               1686.25275  180.98282

Signal 3: DAD1 C, Sig=254,4 Ref=360,100

Signal 4: DAD1 D, Sig=280,4 Ref=360,100

Signal 5: DAD1 E, Sig=310,4 Ref=360,100

=====
*** End of Report ***
  
```

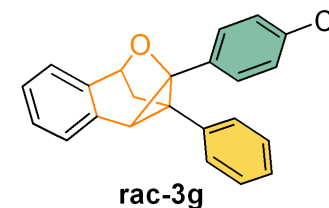

```

=====
Acq. Operator   :                               Seq. Line :    2
Acq. Instrument : Instrument 1                   Location  :    41
Injection Date  : 21/1/2022 10:54:29 pm         Inj       :    1
                                                Inj Volume: 5.000 µl

Acq. Method    : C:\Chem32\1\DATA\SUN_12 2022-01-22 14-41-42\IC-02-30.M
Last changed   :                               (modified after loading)

Analysis Method: C:\Users\Public\Documents\ChemStation\1\Data\SUN\SUN 2024-03-13 00-13-49\AD-01
-30-0.5.M (Sequence Method)
Last changed   : 13/3/2024 6:51:40 pm by SYSTEM
                                                (modified after loading)

Additional Info : Peak(s) manually integrated
  
```

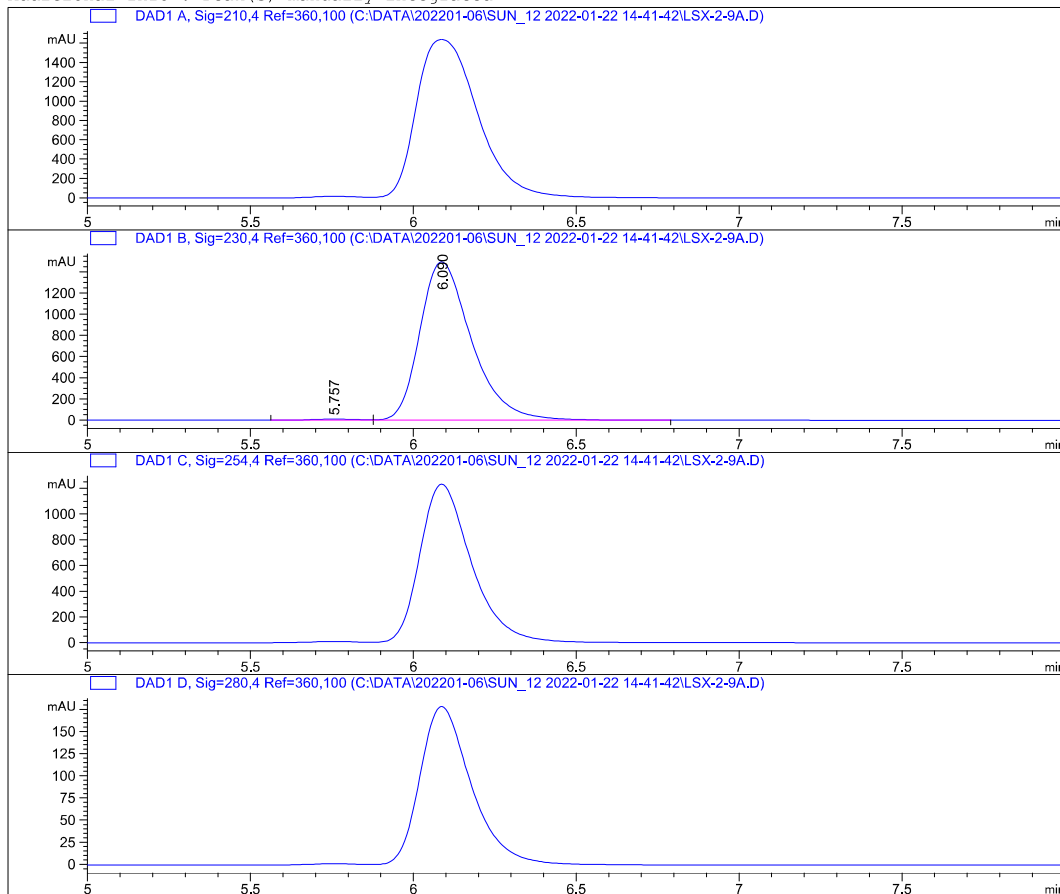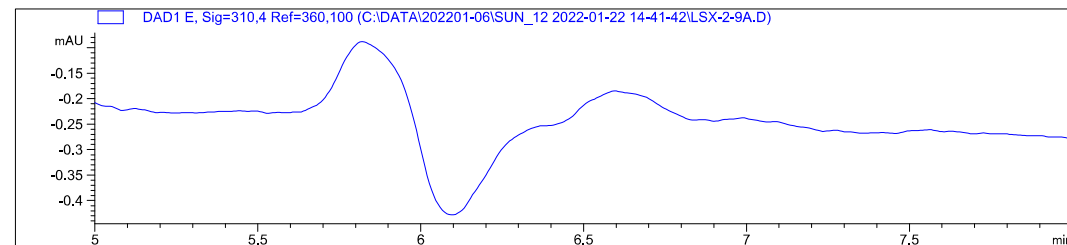

```

=====
Area Percent Report
=====

Sorted By      :      Signal
Multiplier     :      1.0000
Dilution       :      1.0000
Use Multiplier & Dilution Factor with ISTDs
  
```

Signal 1: DAD1 A, Sig=210,4 Ref=360,100

Signal 2: DAD1 B, Sig=230,4 Ref=360,100

| Peak # | RetTime [min] | Type | Width [min] | Area [mAU*s] | Height [mAU] | Area %  |
|--------|---------------|------|-------------|--------------|--------------|---------|
| 1      | 5.757         | BV   | 0.1488      | 108.80631    | 11.45479     | 0.6537  |
| 2      | 6.090         | VB   | 0.1666      | 1.65353e4    | 1500.02625   | 99.3463 |

Totals : 1.66441e4 1511.48103

Signal 3: DAD1 C, Sig=254,4 Ref=360,100

Signal 4: DAD1 D, Sig=280,4 Ref=360,100

Signal 5: DAD1 E, Sig=310,4 Ref=360,100

| Peak # | RetTime [min] | Type | Width [min] | Area [mAU*s] | Height [mAU] | Area %   |
|--------|---------------|------|-------------|--------------|--------------|----------|
| 1      | 4.167         | BB   | 0.1859      | 18.95916     | 1.51598      | 100.0000 |

Totals : 18.95916 1.51598

\*\*\* End of Report \*\*\*

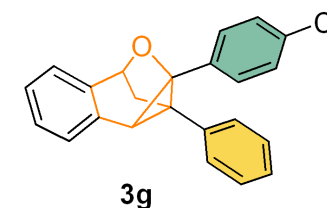

```

=====
Acq. Operator   :                               Seq. Line :    3
Acq. Instrument : Instrument 1                   Location  :   41
Injection Date  : 1/8/2022 8:09:45 pm          Inj       :    1
                                                Inj Volume: 5.000 µl
Different Inj Volume from Sample Entry! Actual Inj Volume : 10.000 µl
Acq. Method    : C:\Chem32\1\DATA\SUN_12 2022-08-02 10-25-51\IC-05-60.M
Last changed   :                               (modified after loading)
Analysis Method: C:\Users\Public\Documents\ChemStation\1\Data\SUN\SUN 2024-03-13 00-13-49\AD-01
               : -30-0.5.M (Sequence Method)
Last changed   : 13/3/2024 6:59:52 pm by SYSTEM
               :                               (modified after loading)
Additional Info: Peak(s) manually integrated
  
```

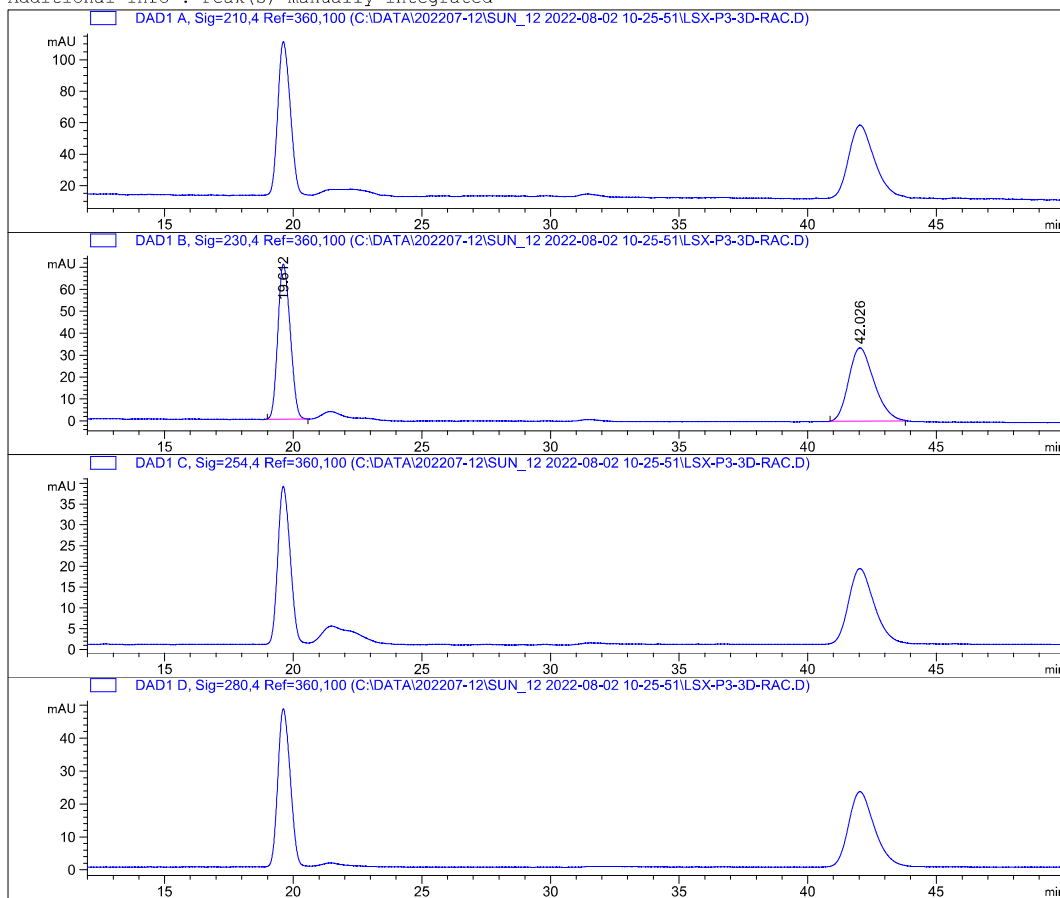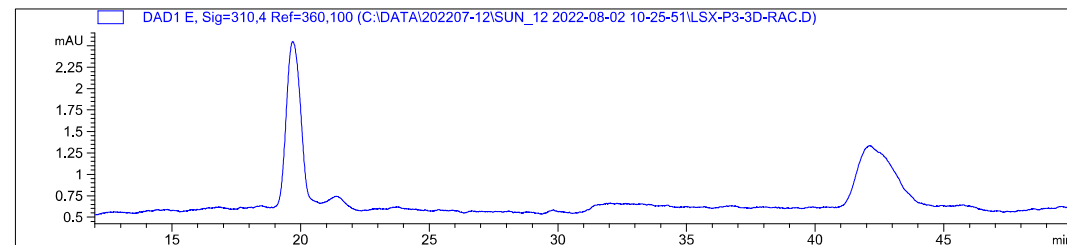

```

=====
                          Area Percent Report
=====
Sorted By      :      Signal
Multiplier    :      1.0000
Dilution      :      1.0000
Use Multiplier & Dilution Factor with ISTDs

Signal 1: DAD1 A, Sig=210,4 Ref=360,100

Signal 2: DAD1 B, Sig=230,4 Ref=360,100

Peak RetTime Type  Width   Area      Height   Area
#   [min]          [min]  [mAU*s]  [mAU]    %
-----|-----|-----|-----|-----|-----|
  1   19.612  BB      0.5332  2361.09155  70.76770  50.6720
  2   42.026  BB      1.0080  2298.46875  33.43648  49.3280

Totals :                               4659.56030  104.20418

Signal 3: DAD1 C, Sig=254,4 Ref=360,100

Signal 4: DAD1 D, Sig=280,4 Ref=360,100

Signal 5: DAD1 E, Sig=310,4 Ref=360,100

=====
*** End of Report ***
  
```

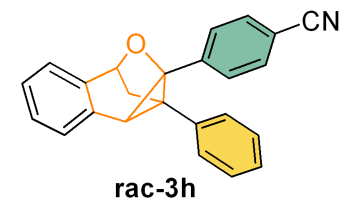

```

=====
Acq. Operator   :                               Seq. Line : 17
Acq. Instrument : Instrument 1                   Location   : 43
Injection Date  : 26/3/2022 3:46:18 am          Inj        : 1
                                                    Inj Volume : 5.000 µl
Different Inj Volume from Sample Entry! Actual Inj Volume : 8.000 µl
Acq. Method    : C:\Chem32\1\DATA\SUN_12 2022-03-26 14-17-08\IC-05-60.M
Last changed   :                               (modified after loading)
Analysis Method : C:\Users\Public\Documents\ChemStation\1\Data\SUN\SUN_2024-03-13 17-26-47\OD-00
                : -20.M (Sequence Method)
Last changed   : 13/3/2024 10:13:55 pm by SYSTEM (modified after loading)
Additional Info : Peak(s) manually integrated
  
```

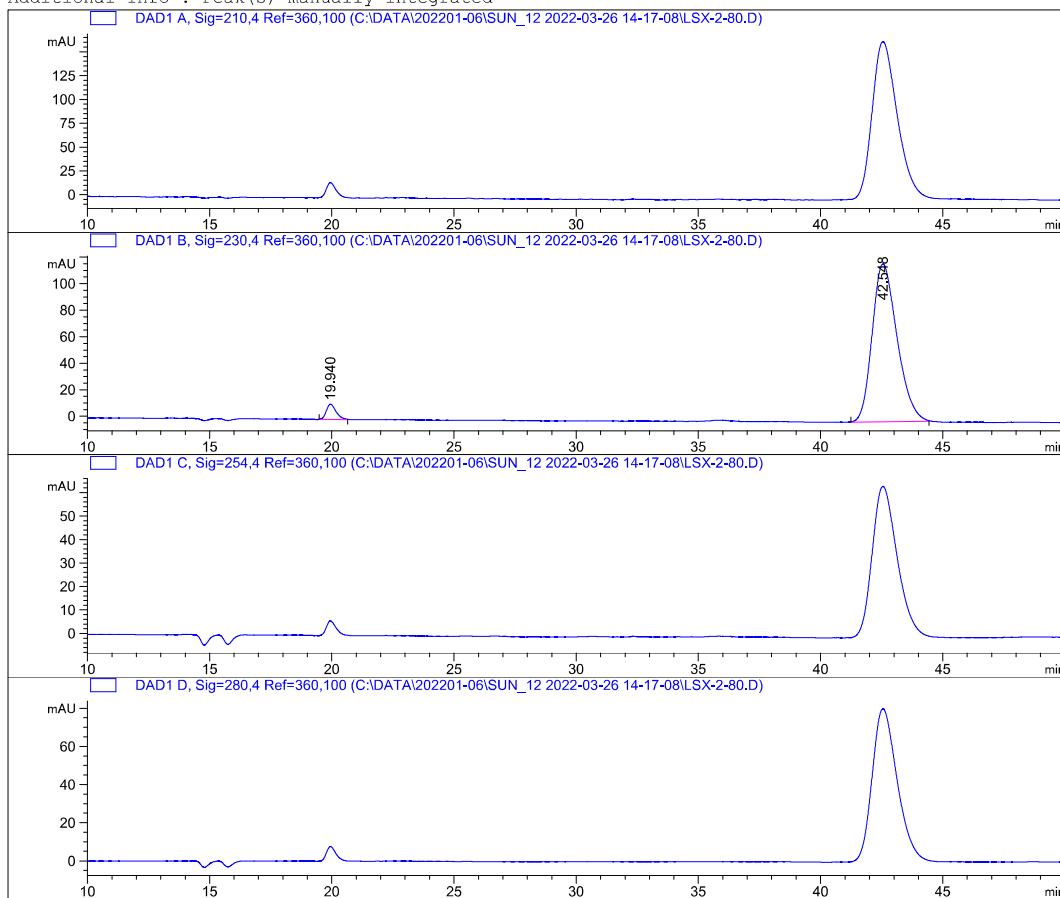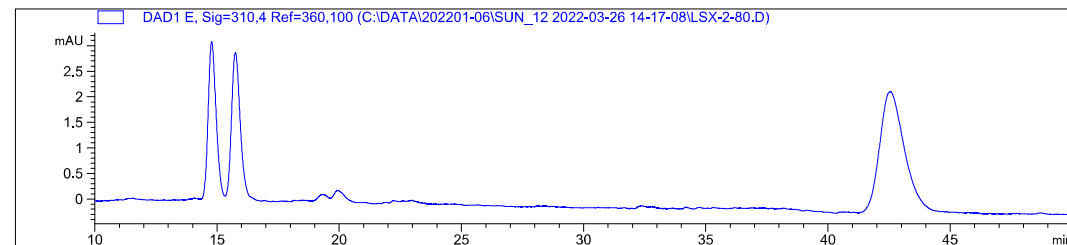

=====  
 Area Percent Report  
 =====

Sorted By : Signal  
 Multiplier : 1.0000  
 Dilution : 1.0000  
 Use Multiplier & Dilution Factor with ISTDs

Signal 1: DAD1 A, Sig=210,4 Ref=360,100

Signal 2: DAD1 B, Sig=230,4 Ref=360,100

| Peak # | RetTime [min] | Type | Width [min] | Area [mAU*s] | Height [mAU] | Area %  |
|--------|---------------|------|-------------|--------------|--------------|---------|
| 1      | 19.940        | BB   | 0.4227      | 313.61639    | 11.48019     | 3.5907  |
| 2      | 42.548        | BB   | 1.0803      | 8420.54102   | 118.88423    | 96.4093 |

Totals : 8734.15741 130.36442

Signal 3: DAD1 C, Sig=254,4 Ref=360,100

Signal 4: DAD1 D, Sig=280,4 Ref=360,100

Signal 5: DAD1 E, Sig=310,4 Ref=360,100

=====  
 \*\*\* End of Report \*\*\*

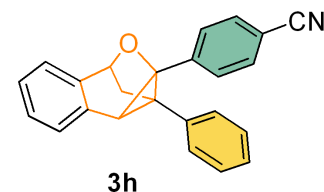

```
=====
Acq. Operator   :                               Seq. Line :    4
Acq. Instrument : Instrument 1                  Location  :   43
Injection Date  : 24/7/2022 3:05:01 am         Inj       :    1
                                                Inj Volume: 5.000 µl

Acq. Method    : C:\Chem32\1\DATA\SUN_12 2022-07-24 16-49-13\IC-02-30.M
Last changed   :                               (modified after loading)

Analysis Method: C:\Users\Public\Documents\ChemStation\1\Data\SUN\SUN 2024-03-13 17-26-47\OD-00
                -20.M (Sequence Method)
Last changed   : 13/3/2024 10:20:12 pm by SYSTEM
                (modified after loading)

Additional Info: Peak(s) manually integrated
=====
```

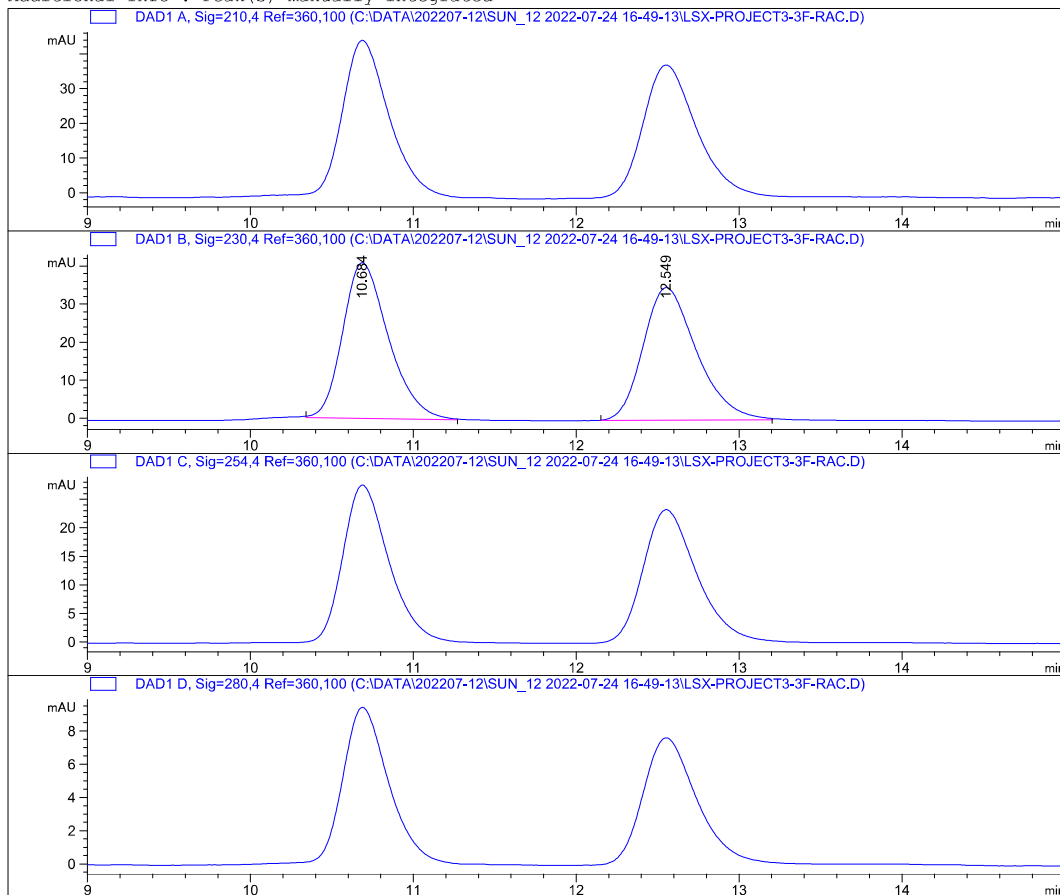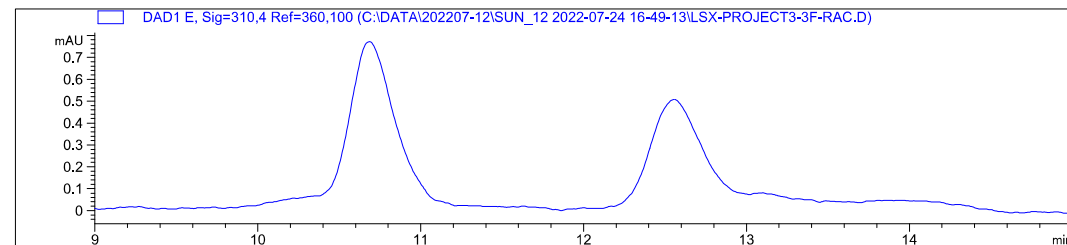

=====  
 Area Percent Report  
 =====

Sorted By : Signal  
 Multiplier : 1.0000  
 Dilution : 1.0000  
 Use Multiplier & Dilution Factor with ISTDs

Signal 1: DAD1 A, Sig=210,4 Ref=360,100

Signal 2: DAD1 B, Sig=230,4 Ref=360,100

| Peak # | RetTime [min] | Type | Width [min] | Area [mAU*s] | Height [mAU] | Area %  |
|--------|---------------|------|-------------|--------------|--------------|---------|
| 1      | 10.684        | BB   | 0.2979      | 800.22064    | 40.97282     | 50.1543 |
| 2      | 12.549        | BB   | 0.3459      | 795.29755    | 34.89804     | 49.8457 |

Totals : 1595.51819 75.87086

Signal 3: DAD1 C, Sig=254,4 Ref=360,100

Signal 4: DAD1 D, Sig=280,4 Ref=360,100

Signal 5: DAD1 E, Sig=310,4 Ref=360,100

=====  
 \*\*\* End of Report \*\*\*

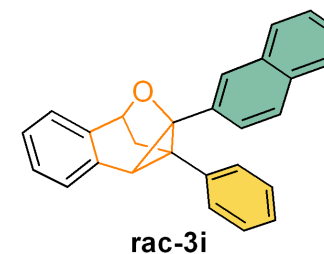



```

=====
Acq. Operator   :                               Seq. Line :   11
Acq. Instrument : Instrument 1                   Location  :   42
Injection Date  : 26/3/2022 2:09:47 am          Inj       :    1
                                                Inj Volume: 5.000 µl
Different Inj Volume from Sample Entry! Actual Inj Volume : 8.000 µl
Acq. Method    : C:\Chem32\1\DATA\SUN_12 2022-03-26 14-17-08\IC-02-30.M
Last changed   :                               (modified after loading)
Analysis Method: C:\Users\Public\Documents\ChemStation\1\Data\SUN\SUN_2024-03-13 17-26-47\OD-00
                                                -20.M (Sequence Method)
Last changed   : 13/3/2024 10:20:12 pm by SYSTEM
                                                (modified after loading)
Additional Info : Peak(s) manually integrated
  
```

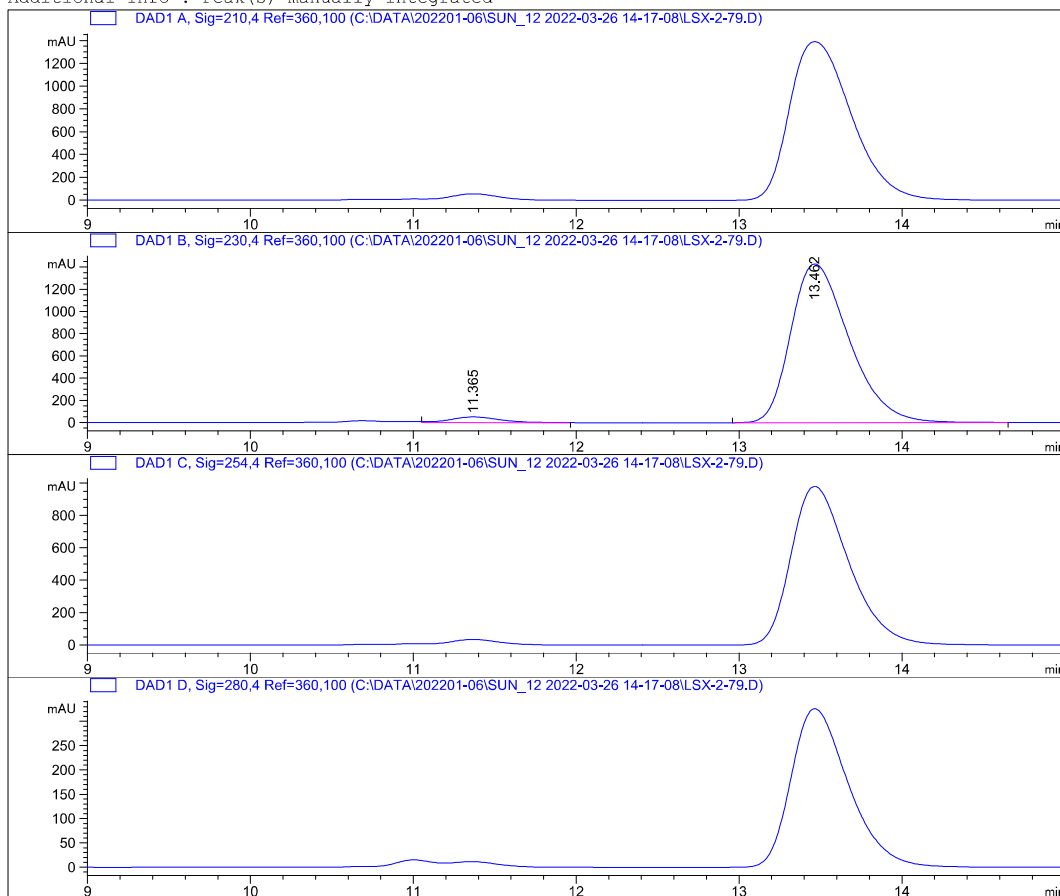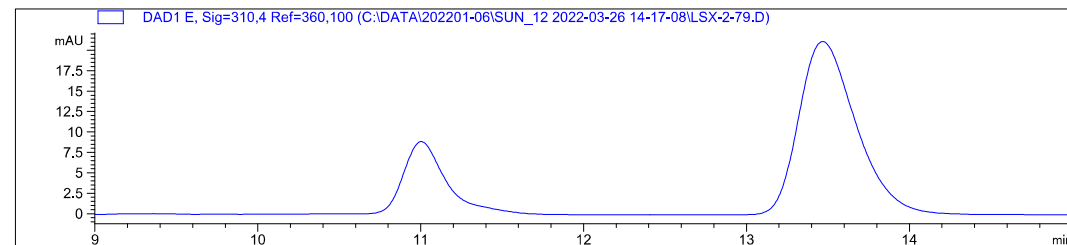

=====  
 Area Percent Report  
 =====

Sorted By : Signal  
 Multiplier : 1.0000  
 Dilution : 1.0000  
 Use Multiplier & Dilution Factor with ISTDs

Signal 1: DAD1 A, Sig=210,4 Ref=360,100

Signal 2: DAD1 B, Sig=230,4 Ref=360,100

| Peak # | RetTime [min] | Type | Width [min] | Area [mAU*s] | Height [mAU] | Area %  |
|--------|---------------|------|-------------|--------------|--------------|---------|
| 1      | 11.365        | VB   | 0.3222      | 1072.72888   | 50.84315     | 2.9248  |
| 2      | 13.462        | BB   | 0.3867      | 3.56041e4    | 1428.71472   | 97.0752 |

Totals : 3.66769e4 1479.55787

Signal 3: DAD1 C, Sig=254,4 Ref=360,100

Signal 4: DAD1 D, Sig=280,4 Ref=360,100

Signal 5: DAD1 E, Sig=310,4 Ref=360,100

=====  
 \*\*\* End of Report \*\*\*

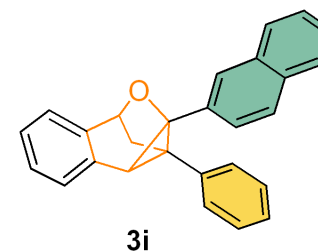

```

=====
Acq. Operator   :                               Seq. Line :    5
Acq. Instrument : Instrument 1                   Location   :   44
Injection Date  : 24/7/2022 3:35:58 am          Inj        :    1
                                                Inj Volume : 5.000 µl

Acq. Method    : C:\Chem32\1\DATA\SUN_12 2022-07-24 16-49-13\IC-02-30.M
Last changed   :                               (modified after loading)

Analysis Method : C:\Users\Public\Documents\ChemStation\1\Data\SUN\SUN 2024-03-13 17-26-47\OD-00
                : -20.M (Sequence Method)
Last changed   : 13/3/2024 10:25:44 pm by SYSTEM
                : (modified after loading)

Additional Info : Peak(s) manually integrated
  
```

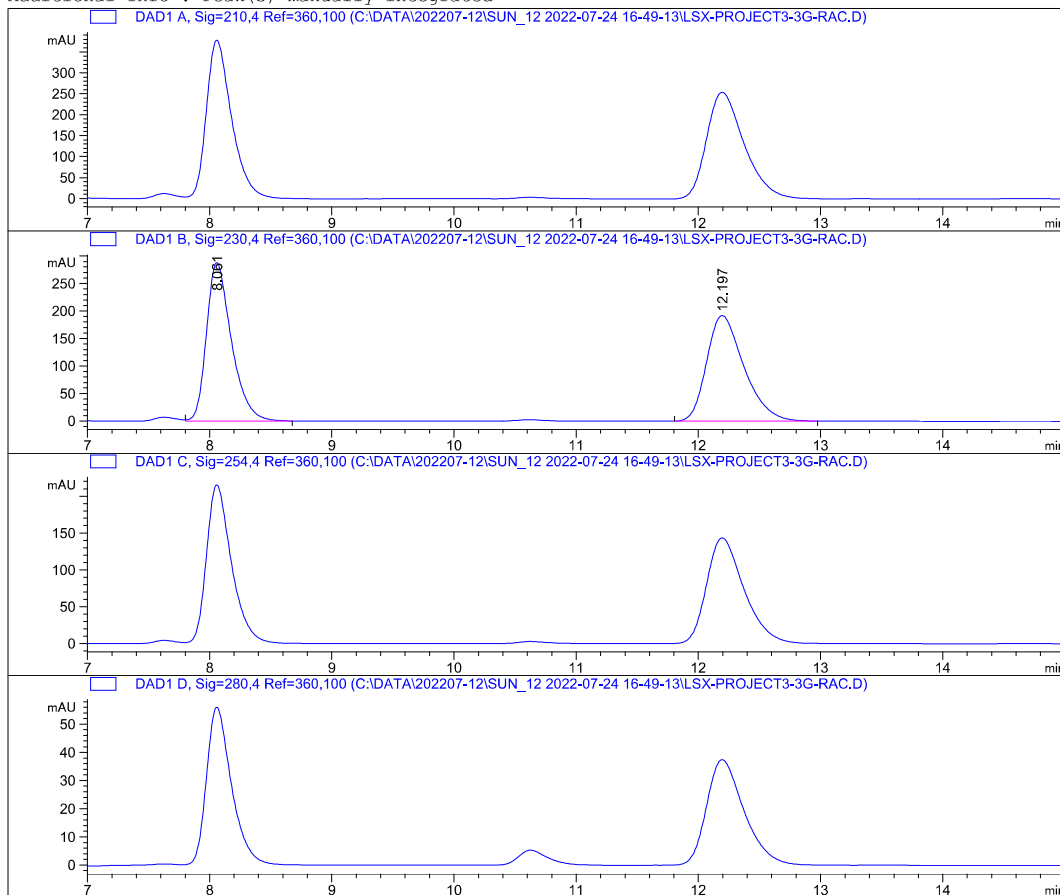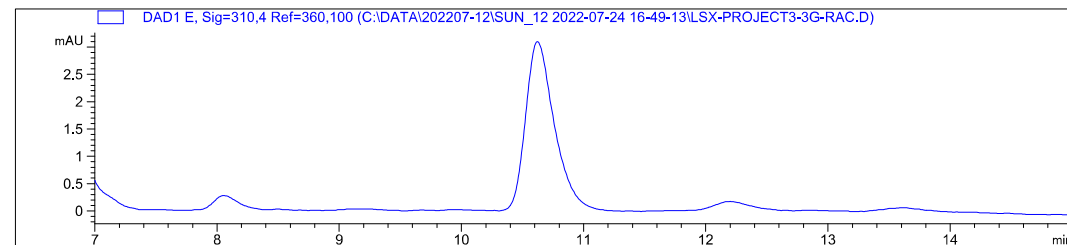

=====  
 Area Percent Report  
 =====

```

Sorted By      :      Signal
Multiplier    :      1.0000
Dilution      :      1.0000
Use Multiplier & Dilution Factor with ISTDs
  
```

Signal 1: DAD1 A, Sig=210,4 Ref=360,100

Signal 2: DAD1 B, Sig=230,4 Ref=360,100

| Peak # | RetTime [min] | Type | Width [min] | Area [mAU*s] | Height [mAU] | Area %  |
|--------|---------------|------|-------------|--------------|--------------|---------|
| 1      | 8.061         | VB   | 0.2140      | 4101.22998   | 288.21036    | 50.1711 |
| 2      | 12.197        | BB   | 0.3213      | 4073.25879   | 192.12576    | 49.8289 |

Totals :                                    8174.48877    480.33612

Signal 3: DAD1 C, Sig=254,4 Ref=360,100

Signal 4: DAD1 D, Sig=280,4 Ref=360,100

Signal 5: DAD1 E, Sig=310,4 Ref=360,100

=====  
 \*\*\* End of Report \*\*\*

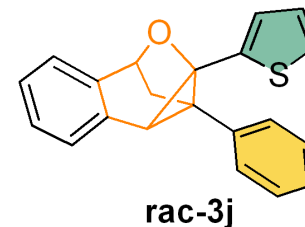

```

=====
Acq. Operator   :                               Seq. Line :    2
Acq. Instrument : Instrument 1                  Location  :   41
Injection Date  : 25/3/2022 8:03:36 pm         Inj       :    1
                                                Inj Volume: 5.000 µl
Different Inj Volume from Sample Entry! Actual Inj Volume : 8.000 µl
Acq. Method    : C:\Chem32\1\DATA\SUN_12 2022-03-26 10-50-48\IC-02-30.M
Last changed   :                               (modified after loading)
Analysis Method: C:\Users\Public\Documents\ChemStation\1\Data\SUN\SUN_2024-03-13 17-26-47\OD-00
                -20.M (Sequence Method)
Last changed   : 13/3/2024 10:25:44 pm by SYSTEM
                (modified after loading)
Additional Info : Peak(s) manually integrated
  
```

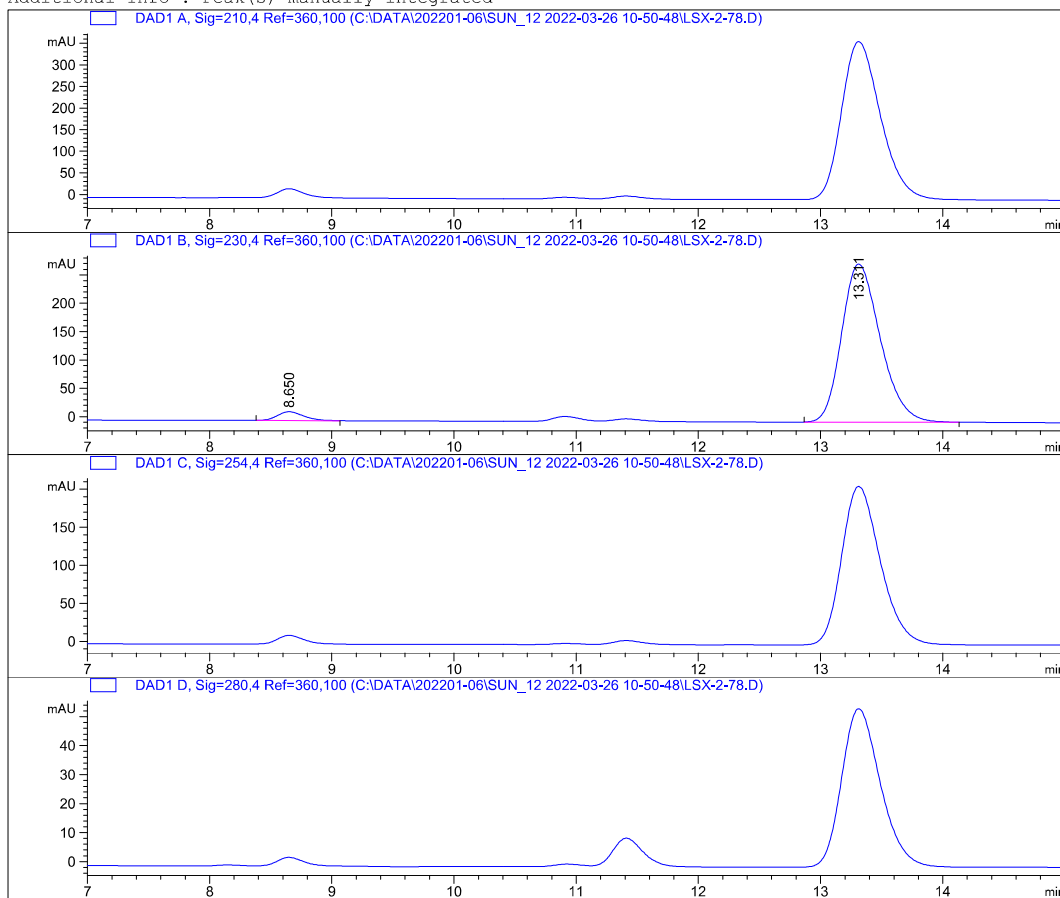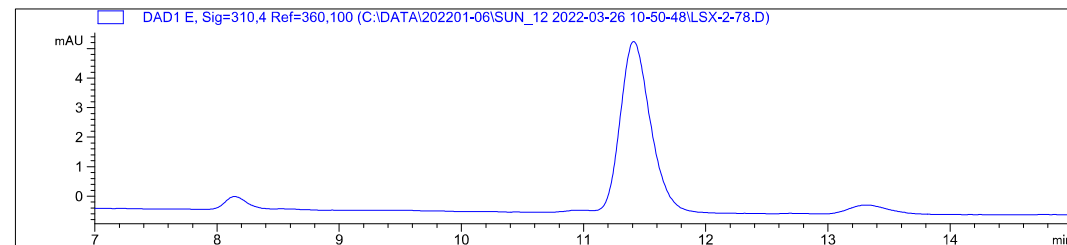

=====  
 Area Percent Report  
 =====

```

Sorted By      :      Signal
Multiplier    :      1.0000
Dilution      :      1.0000
Use Multiplier & Dilution Factor with ISTDs
  
```

Signal 1: DAD1 A, Sig=210,4 Ref=360,100

Signal 2: DAD1 B, Sig=230,4 Ref=360,100

| Peak # | RetTime [min] | Type | Width [min] | Area [mAU*s] | Height [mAU] | Area %  |
|--------|---------------|------|-------------|--------------|--------------|---------|
| 1      | 8.650         | BB   | 0.2285      | 231.77061    | 15.49835     | 3.6366  |
| 2      | 13.311        | BB   | 0.3387      | 6141.45313   | 279.10840    | 96.3634 |

Totals :                                    6373.22374    294.60674

Signal 3: DAD1 C, Sig=254,4 Ref=360,100

Signal 4: DAD1 D, Sig=280,4 Ref=360,100

Signal 5: DAD1 E, Sig=310,4 Ref=360,100

=====  
 \*\*\* End of Report \*\*\*

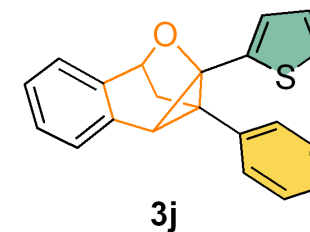

```

=====
Acq. Operator   :                               Seq. Line :    8
Acq. Instrument : Instrument 1                   Location  :   41
Injection Date  : 4/8/2022 9:02:18 pm          Inj       :    1
                                                Inj Volume: 5.000 µl
Different Inj Volume from Sample Entry! Actual Inj Volume : 8.000 µl
Acq. Method    : C:\Chem32\1\DATA\SUN_12 2022-08-05 08-58-56\IC-02-30.M
Last changed   :                               (modified after loading)
Analysis Method: C:\Users\Public\Documents\ChemStation\1\Data\SUN\SUN_2024-03-13 17-26-47\OD-00
                                                -20.M (Sequence Method)
Last changed   : 13/3/2024 10:16:44 pm by SYSTEM
                                                (modified after loading)
Additional Info : Peak(s) manually integrated
  
```

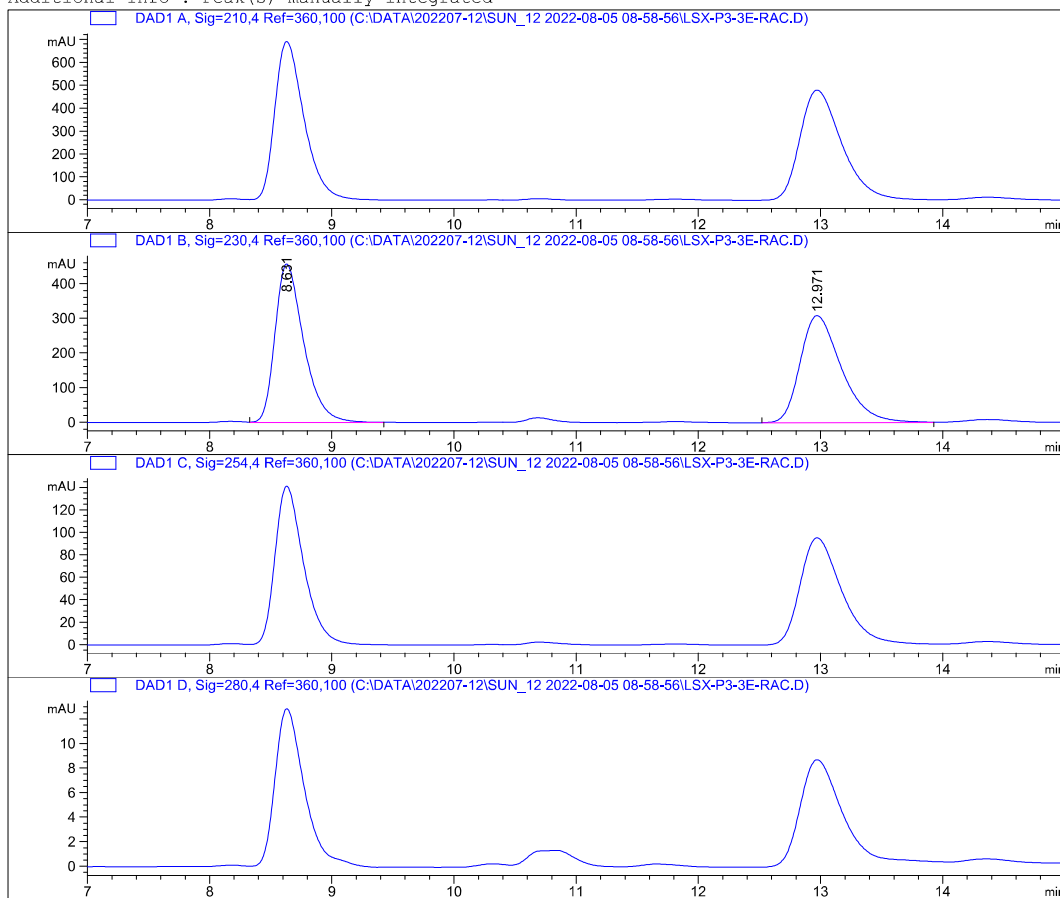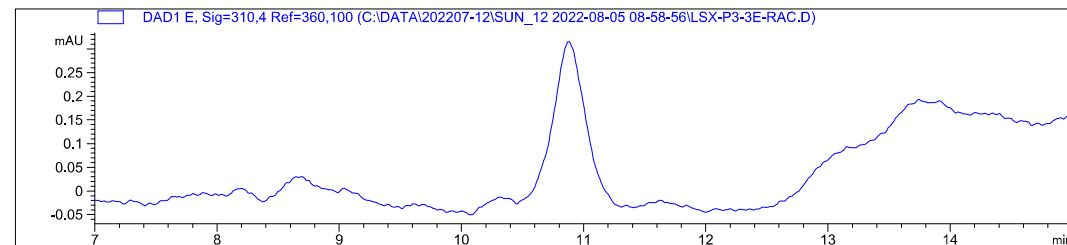

=====  
 Area Percent Report  
 =====

```

Sorted By      :      Signal
Multiplier    :      1.0000
Dilution      :      1.0000
Use Multiplier & Dilution Factor with ISTDs
  
```

Signal 1: DAD1 A, Sig=210,4 Ref=360,100

Signal 2: DAD1 B, Sig=230,4 Ref=360,100

| Peak # | RetTime [min] | Type | Width [min] | Area [mAU*s] | Height [mAU] | Area %  |
|--------|---------------|------|-------------|--------------|--------------|---------|
| 1      | 8.631         | VB   | 0.2464      | 7458.77051   | 457.08408    | 50.7257 |
| 2      | 12.971        | BB   | 0.3602      | 7245.36279   | 308.31094    | 49.2743 |

Totals : 1.47041e4 765.39502

Signal 3: DAD1 C, Sig=254,4 Ref=360,100

Signal 4: DAD1 D, Sig=280,4 Ref=360,100

Signal 5: DAD1 E, Sig=310,4 Ref=360,100

=====  
 \*\*\* End of Report \*\*\*

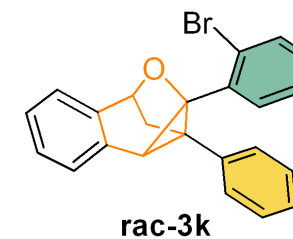

```

=====
Acq. Operator   :                               Seq. Line :    2
Acq. Instrument : Instrument 1                   Location  :   41
Injection Date  : 6/5/2022 5:04:00 am           Inj       :    1
                                                Inj Volume: 5.000 µl
Different Inj Volume from Sample Entry! Actual Inj Volume : 10.000 µl
Acq. Method    : C:\Chem32\1\DATA\SUN_12 2022-05-06 19-51-00\IC-02-30.M
Last changed   :                               (modified after loading)
Analysis Method: C:\Users\Public\Documents\ChemStation\1\Data\SUN\SUN_2024-03-13 17-26-47\OD-00
                -20.M (Sequence Method)
Last changed   : 13/3/2024 10:18:07 pm by SYSTEM
                (modified after loading)
Additional Info : Peak(s) manually integrated
  
```

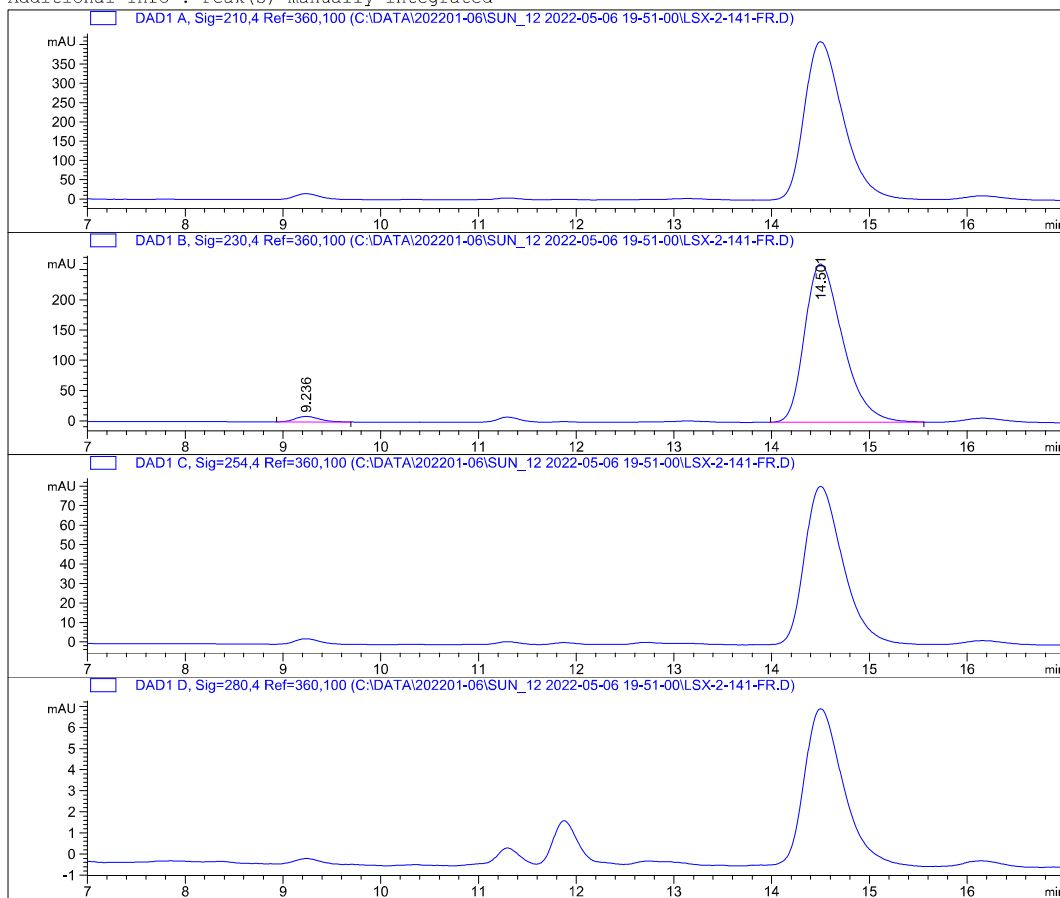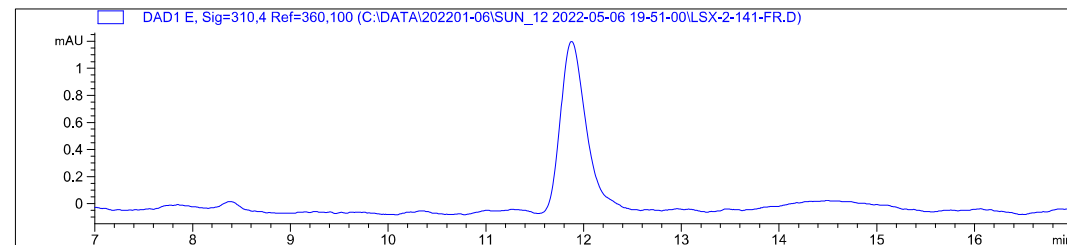

=====  
 Area Percent Report  
 =====

Sorted By : Signal  
 Multiplier : 1.0000  
 Dilution : 1.0000  
 Use Multiplier & Dilution Factor with ISTDs

Signal 1: DAD1 A, Sig=210,4 Ref=360,100

Signal 2: DAD1 B, Sig=230,4 Ref=360,100

| Peak # | RetTime [min] | Type | Width [min] | Area [mAU*s] | Height [mAU] | Area %  |
|--------|---------------|------|-------------|--------------|--------------|---------|
| 1      | 9.236         | BB   | 0.2621      | 157.32568    | 9.08126      | 2.1678  |
| 2      | 14.501        | BB   | 0.4166      | 7100.08203   | 261.63687    | 97.8322 |

Totals : 7257.40771 270.71813

Signal 3: DAD1 C, Sig=254,4 Ref=360,100

Signal 4: DAD1 D, Sig=280,4 Ref=360,100

Signal 5: DAD1 E, Sig=310,4 Ref=360,100

=====  
 \*\*\* End of Report \*\*\*

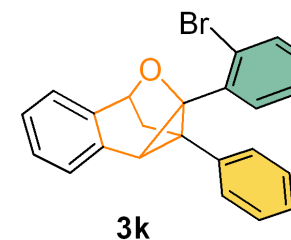

```

=====
Acq. Operator   :                               Seq. Line :    2
Acq. Instrument : Instrument 1                   Location  :   41
Injection Date  : 2/8/2022 8:06:45 pm          Inj       :    1
                                                Inj Volume: 5.000 µl
Different Inj Volume from Sample Entry! Actual Inj Volume : 8.000 µl
Acq. Method    : C:\Chem32\1\DATA\SUN_12 2022-08-03 10-53-42\IC-02-30.M
Last changed   :                               (modified after loading)
Analysis Method: C:\Users\Public\Documents\ChemStation\1\Data\SUN\SUN_2024-03-13 17-26-47\OD-00
                -20.M (Sequence Method)
Last changed   : 13/3/2024 10:50:10 pm by SYSTEM
                (modified after loading)
Additional Info : Peak(s) manually integrated
  
```

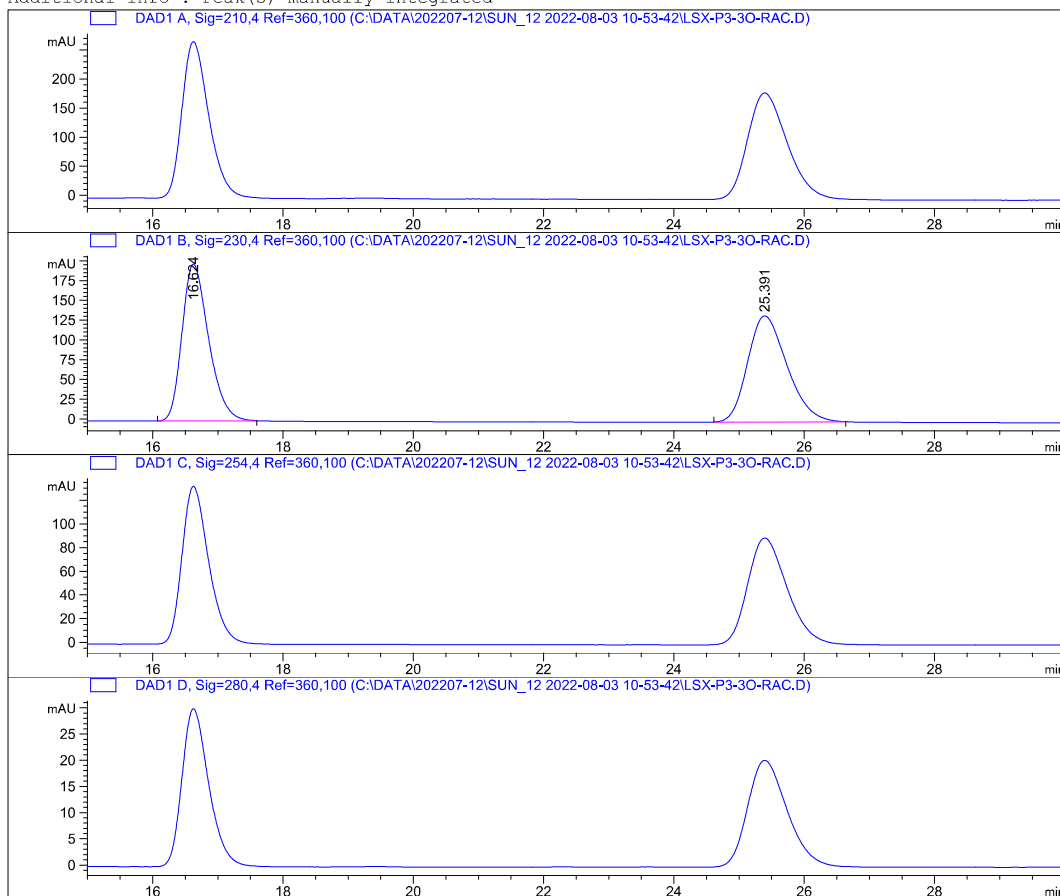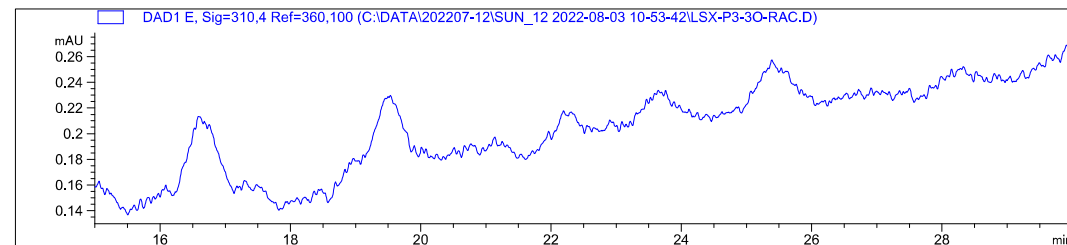

```

=====
Area Percent Report
=====
Sorted By      :      Signal
Multiplier    :      1.0000
Dilution      :      1.0000
Use Multiplier & Dilution Factor with ISTDs

Signal 1: DAD1 A, Sig=210,4 Ref=360,100

Signal 2: DAD1 B, Sig=230,4 Ref=360,100

Peak RetTime Type Width Area Height Area
# [min] |-----| [min] [mAU*s] | [mAU] |-----| %
-----|-----|-----|-----|-----|-----|
1 16.624 BB 0.4381 5646.89551 198.38628 50.0481
2 25.391 BB 0.6482 5636.03174 134.14885 49.9519
-----|-----|-----|-----|-----|-----|
Totals :                               1.12829e4 332.53513

Signal 3: DAD1 C, Sig=254,4 Ref=360,100

Signal 4: DAD1 D, Sig=280,4 Ref=360,100

Signal 5: DAD1 E, Sig=310,4 Ref=360,100

=====
*** End of Report ***
=====
  
```

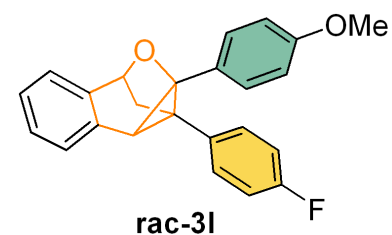

```

=====
Acq. Operator   :                               Seq. Line :   20
Acq. Instrument : Instrument 1                 Location    :   44
Injection Date  : 14/2/2022 1:22:01 pm        Inj         :    1
                                                Inj Volume  : 5.000 µl
Different Inj Volume from Sample Entry! Actual Inj Volume : 10.000 µl
Acq. Method    : C:\Chem32\1\DATA\SUN_12 2022-02-14 21-09-52\IC-02-30.M
Last changed   :                               (modified after loading)
Analysis Method : C:\Users\Public\Documents\ChemStation\1\Data\SUN\SUN_2024-03-13 17-26-47\OD-00
                                                -20.M (Sequence Method)
Last changed   : 13/3/2024 10:50:10 pm by SYSTEM
                                                (modified after loading)
Additional Info : Peak(s) manually integrated
  
```

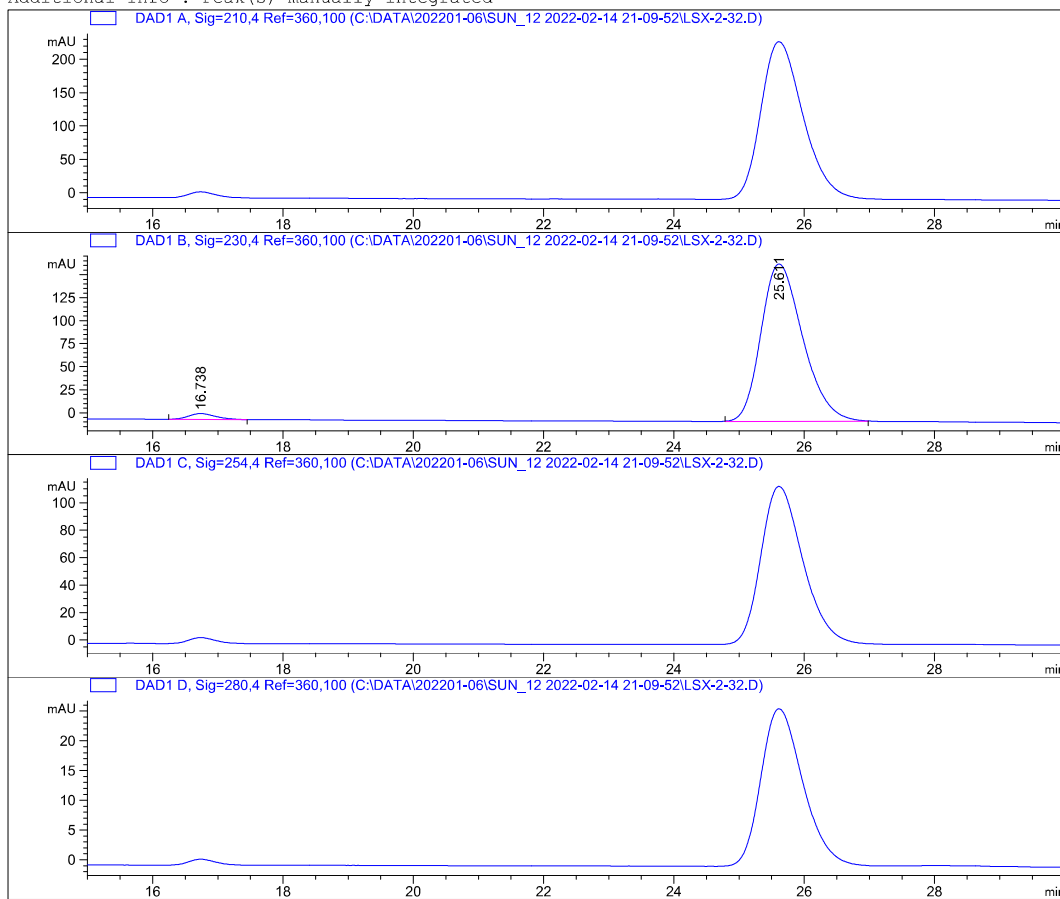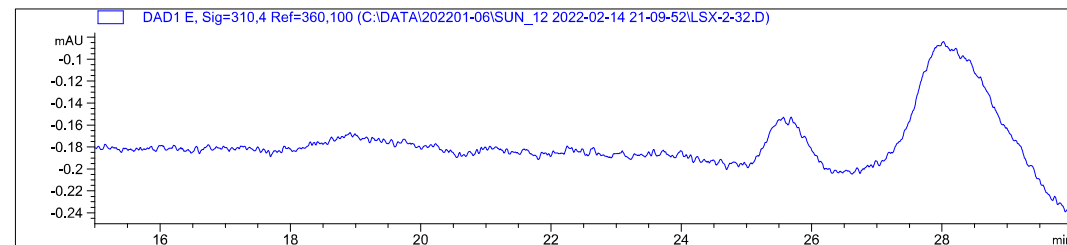

=====  
 Area Percent Report  
 =====

```

Sorted By      :      Signal
Multiplier    :      1.0000
Dilution      :      1.0000
Use Multiplier & Dilution Factor with ISTDs
  
```

Signal 1: DAD1 A, Sig=210,4 Ref=360,100

Signal 2: DAD1 B, Sig=230,4 Ref=360,100

| Peak # | RetTime [min] | Type | Width [min] | Area [mAU*s] | Height [mAU] | Area %  |
|--------|---------------|------|-------------|--------------|--------------|---------|
| 1      | 16.738        | BB   | 0.4070      | 178.94763    | 6.30701      | 2.2903  |
| 2      | 25.611        | BB   | 0.6872      | 7634.36328   | 170.87814    | 97.7097 |

Totals :                                    7813.31091   177.18515

Signal 3: DAD1 C, Sig=254,4 Ref=360,100

Signal 4: DAD1 D, Sig=280,4 Ref=360,100

Signal 5: DAD1 E, Sig=310,4 Ref=360,100

=====  
 \*\*\* End of Report \*\*\*

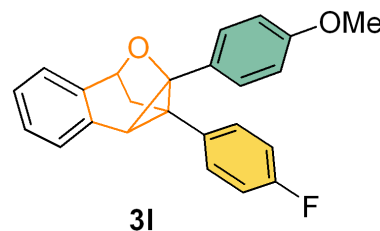

```

=====
Acq. Operator   :                               Seq. Line :    5
Acq. Instrument : Instrument 1                   Location    :    74
Injection Date  : 27/7/2022 9:56:54 am          Inj         :    1
                                                Inj Volume  : 5.000 µl
Different Inj Volume from Sample Entry! Actual Inj Volume : 10.000 µl
Acq. Method    : C:\Chem32\1\DATA\SUN_12 2022-07-27 23-10-28\IC-02-30.M
Last changed   :                               (modified after loading)
Analysis Method : C:\Users\Public\Documents\ChemStation\1\Data\SUN\SUN_2024-03-13 17-26-47\OD-00
                :                               -20.M (Sequence Method)
Last changed   : 13/3/2024 10:47:51 pm by SYSTEM
                :                               (modified after loading)
Additional Info : Peak(s) manually integrated
  
```

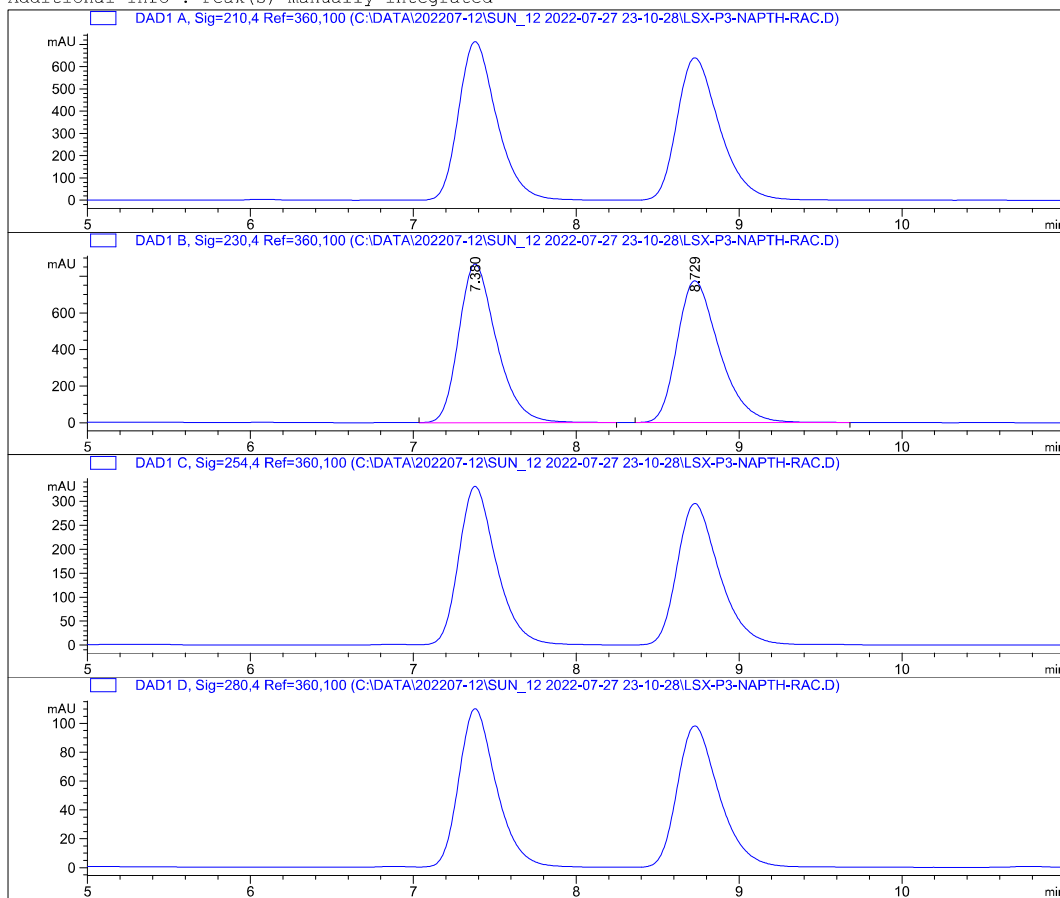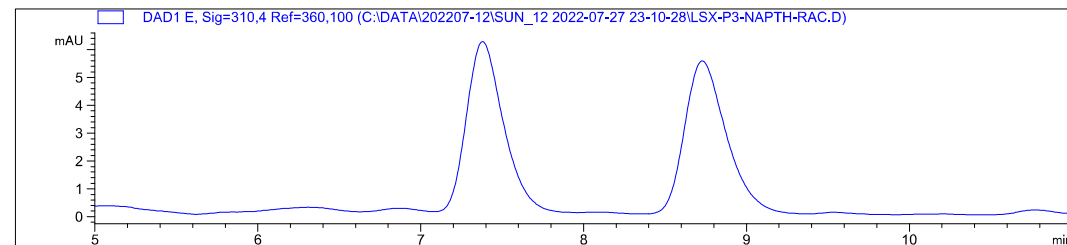

=====  
 Area Percent Report  
 =====

Sorted By : Signal  
 Multiplier : 1.0000  
 Dilution : 1.0000  
 Use Multiplier & Dilution Factor with ISTDs

Signal 1: DAD1 A, Sig=210,4 Ref=360,100

Signal 2: DAD1 B, Sig=230,4 Ref=360,100

| Peak # | RetTime [min] | Type | Width [min] | Area [mAU*s] | Height [mAU] | Area %  |
|--------|---------------|------|-------------|--------------|--------------|---------|
| 1      | 7.380         | BB   | 0.2440      | 1.39588e4    | 866.09265    | 50.0258 |
| 2      | 8.729         | BB   | 0.2741      | 1.39444e4    | 774.32813    | 49.9742 |

Totals : 2.79032e4 1640.42078

Signal 3: DAD1 C, Sig=254,4 Ref=360,100

Signal 4: DAD1 D, Sig=280,4 Ref=360,100

Signal 5: DAD1 E, Sig=310,4 Ref=360,100

=====  
 \*\*\* End of Report \*\*\*

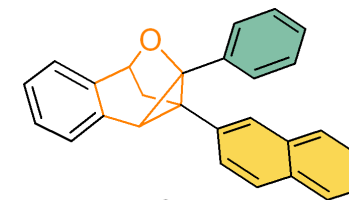

rac-3m



```

=====
Acq. Operator   :                               Seq. Line :    3
Acq. Instrument : Instrument 1                   Location   :    42
Injection Date  : 6/5/2022 5:35:06 am           Inj        :    1
                                                Inj Volume : 5.000 µl
Different Inj Volume from Sample Entry! Actual Inj Volume : 10.000 µl
Acq. Method    : C:\Chem32\1\DATA\SUN_12 2022-05-06 19-51-00\IC-02-30.M
Last changed   :                               (modified after loading)
Analysis Method : C:\Users\Public\Documents\ChemStation\1\Data\SUN\SUN 2024-03-13 17-26-47\OD-00
                                                -20.M (Sequence Method)
Last changed   : 13/3/2024 10:47:51 pm by SYSTEM
                                                (modified after loading)
Additional Info : Peak(s) manually integrated
  
```

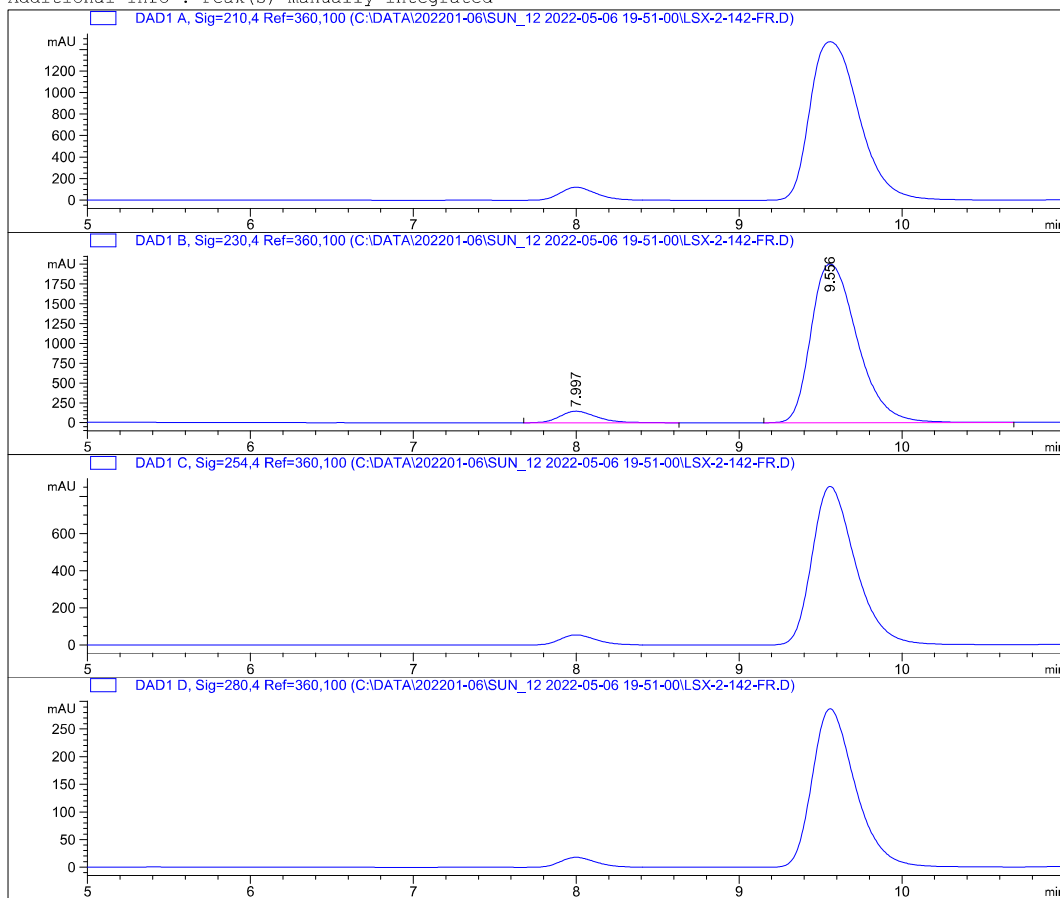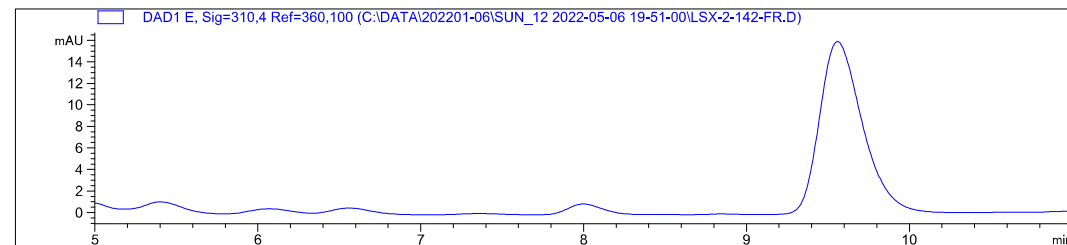

=====  
 Area Percent Report  
 =====

```

Sorted By      :      Signal
Multiplier    :      1.0000
Dilution      :      1.0000
Use Multiplier & Dilution Factor with ISTDs
  
```

Signal 1: DAD1 A, Sig=210,4 Ref=360,100

Signal 2: DAD1 B, Sig=230,4 Ref=360,100

| Peak # | RetTime [min] | Type | Width [min] | Area [mAU*s] | Height [mAU] | Area %  |
|--------|---------------|------|-------------|--------------|--------------|---------|
| 1      | 7.997         | BB   | 0.2361      | 2240.99194   | 145.19551    | 5.3680  |
| 2      | 9.556         | BB   | 0.3080      | 3.95061e4    | 2004.24268   | 94.6320 |

Totals : 4.17470e4 2149.43819

Signal 3: DAD1 C, Sig=254,4 Ref=360,100

Signal 4: DAD1 D, Sig=280,4 Ref=360,100

Signal 5: DAD1 E, Sig=310,4 Ref=360,100

=====  
 \*\*\* End of Report \*\*\*

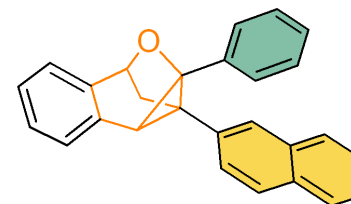

**3m**

```
=====
Acq. Operator   :                               Seq. Line :   13
Acq. Instrument : Instrument 1                 Location  :   42
Injection Date  : 1/8/2022 11:58:09 am        Inj       :    1
                                                Inj Volume: 5.000 µl
Acq. Method    : C:\Chem32\1\DATA\SUN_12 2022-08-01 21-33-13\AD-03-30-0.5.M
Last changed   :                               -20.M (Sequence Method)
Analysis Method: C:\Users\Public\Documents\ChemStation\1\Data\SUN\SUN 2024-03-13 17-26-47\OD-00
Last changed   : 13/3/2024 10:41:01 pm by SYSTEM
                                                (modified after loading)
Additional Info : Peak(s) manually integrated
```

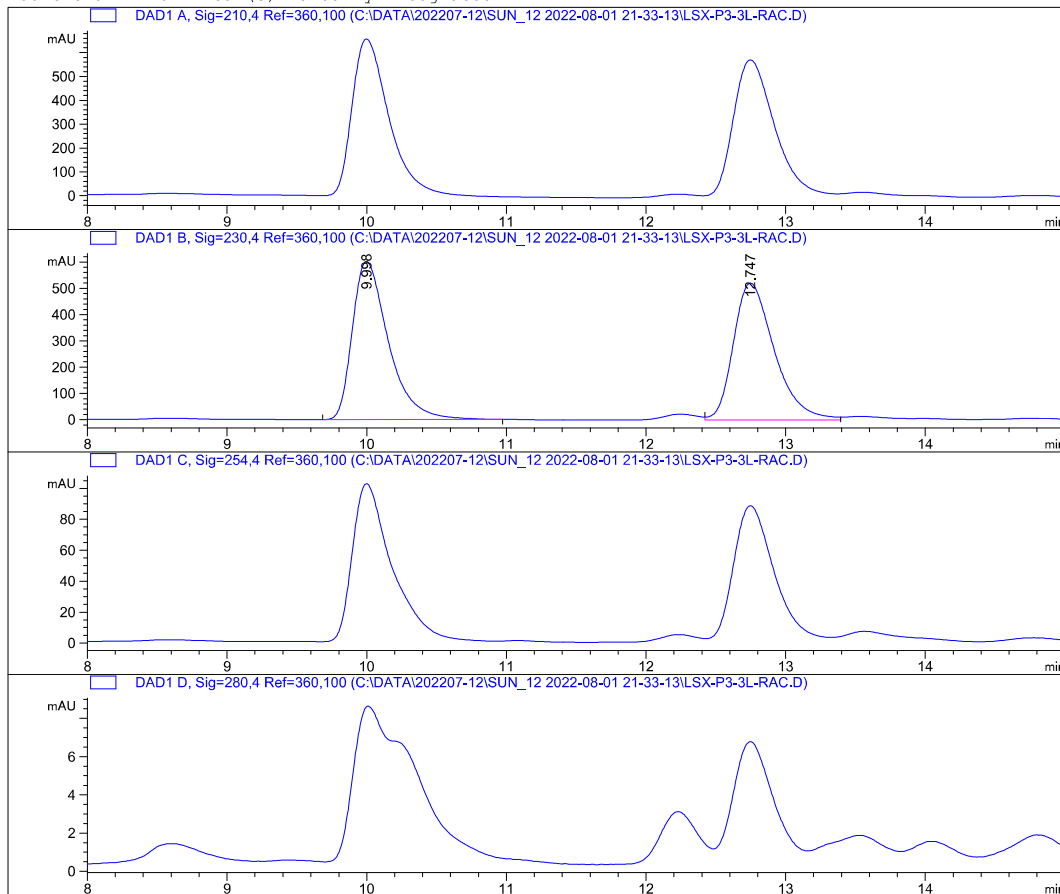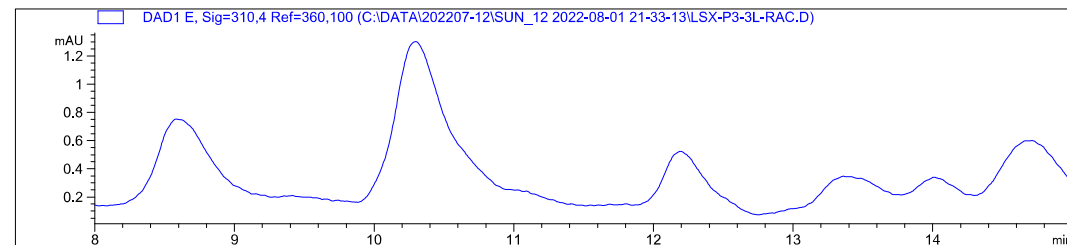

=====  
 Area Percent Report  
 =====

Sorted By : Signal  
 Multiplier : 1.0000  
 Dilution : 1.0000  
 Use Multiplier & Dilution Factor with ISTDs

Signal 1: DAD1 A, Sig=210,4 Ref=360,100

Signal 2: DAD1 B, Sig=230,4 Ref=360,100

| Peak # | RetTime [min] | Type | Width [min] | Area [mAU*s] | Height [mAU] | Area %  |
|--------|---------------|------|-------------|--------------|--------------|---------|
| 1      | 9.998         | BB   | 0.2731      | 1.08005e4    | 602.47620    | 50.4473 |
| 2      | 12.747        | VV   | 0.3114      | 1.06090e4    | 521.29974    | 49.5527 |

Totals : 2.14095e4 1123.77594

Signal 3: DAD1 C, Sig=254,4 Ref=360,100

Signal 4: DAD1 D, Sig=280,4 Ref=360,100

Signal 5: DAD1 E, Sig=310,4 Ref=360,100

=====  
 \*\*\* End of Report \*\*\*

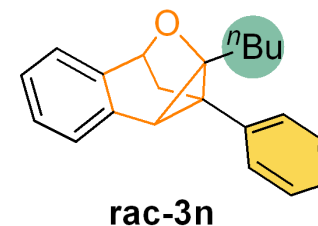

```

=====
Acq. Operator   :                               Seq. Line :    2
Acq. Instrument : Instrument 1                  Location  :   41
Injection Date  : 13/12/2021 6:33:17 am       Inj       :    1
                                                Inj Volume: 5.000 µl
Acq. Method    : C:\Chem32\1\DATA\SUN_12 2021-12-13 22-20-33\AD-03-30-0.5.M
Last changed   :
Analysis Method: C:\Users\Public\Documents\ChemStation\1\Data\SUN\SUN 2024-03-13 17-26-47\OD-00
                -20.M (Sequence Method)
Last changed   : 13/3/2024 10:41:01 pm by SYSTEM
                (modified after loading)
Additional Info : Peak(s) manually integrated
  
```

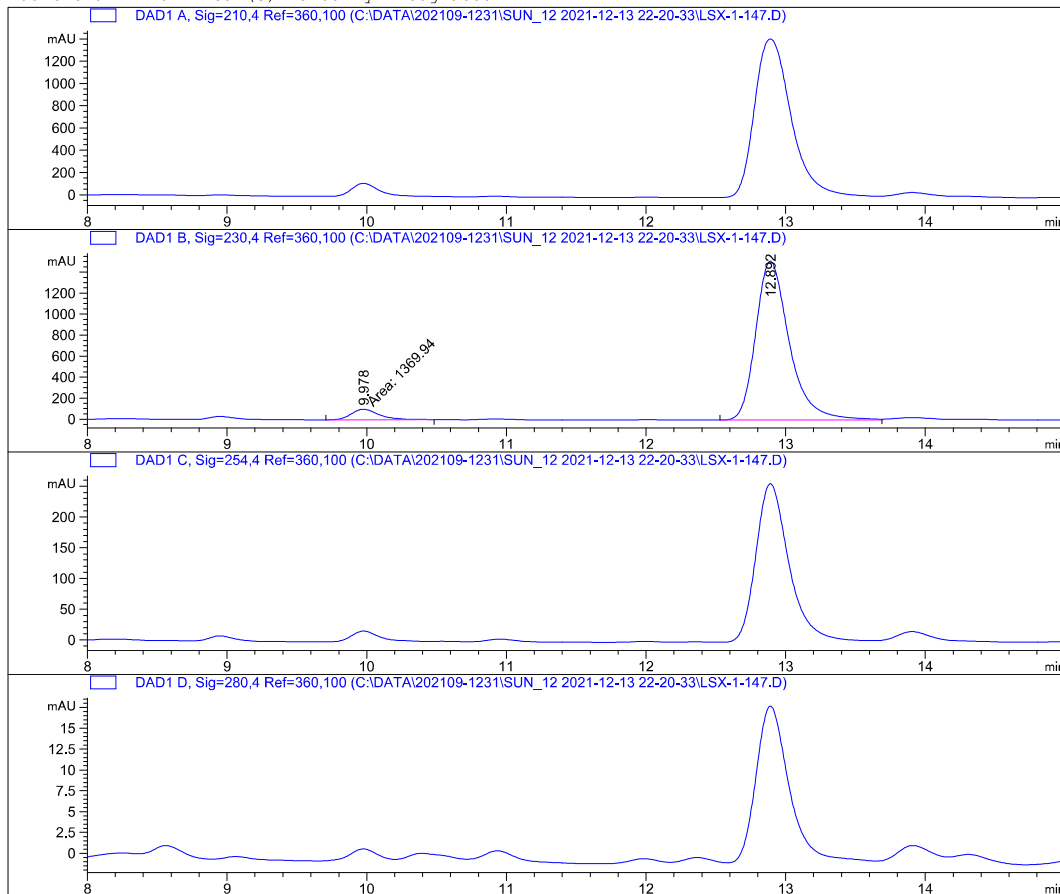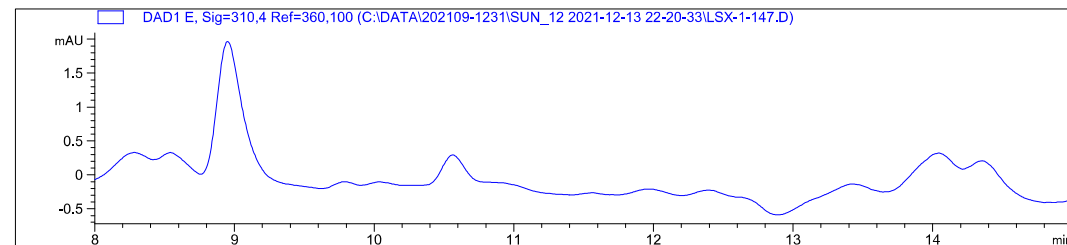

```

=====
Area Percent Report
=====
Sorted By      :      Signal
Multiplier    :      1.0000
Dilution      :      1.0000
Use Multiplier & Dilution Factor with ISTDs
  
```

Signal 1: DAD1 A, Sig=210,4 Ref=360,100

Signal 2: DAD1 B, Sig=230,4 Ref=360,100

| Peak # | RetTime [min] | Type | Width [min] | Area [mAU*s] | Height [mAU] | Area %  |
|--------|---------------|------|-------------|--------------|--------------|---------|
| 1      | 9.978         | MM   | 0.2271      | 1369.93945   | 100.54881    | 5.1421  |
| 2      | 12.892        | BV   | 0.2551      | 2.52716e4    | 1510.90625   | 94.8579 |

Totals : 2.66416e4 1611.45506

Signal 3: DAD1 C, Sig=254,4 Ref=360,100

Signal 4: DAD1 D, Sig=280,4 Ref=360,100

Signal 5: DAD1 E, Sig=310,4 Ref=360,100

```

=====
*** End of Report ***
  
```

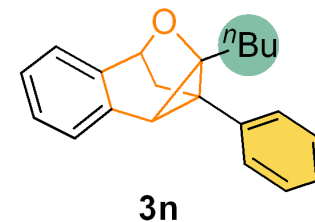

```

=====
Acq. Operator   :                               Seq. Line :    6
Acq. Instrument : Instrument 1                   Location  :   42
Injection Date  : 1/8/2022 9:32:52 pm           Inj       :    1
                                                Inj Volume: 5.000 µl
Different Inj Volume from Sample Entry! Actual Inj Volume : 10.000 µl
Acq. Method    : C:\Chem32\1\DATA\SUN_12 2022-08-02 10-25-51\AD-02-30.M
Last changed   :                               (modified after loading)
Analysis Method: C:\Users\Public\Documents\ChemStation\1\Data\SUN\SUN 2024-03-13 17-26-47\OD-00
                -20.M (Sequence Method)
Last changed   : 13/3/2024 10:44:59 pm by SYSTEM
                (modified after loading)
Additional Info : Peak(s) manually integrated
  
```

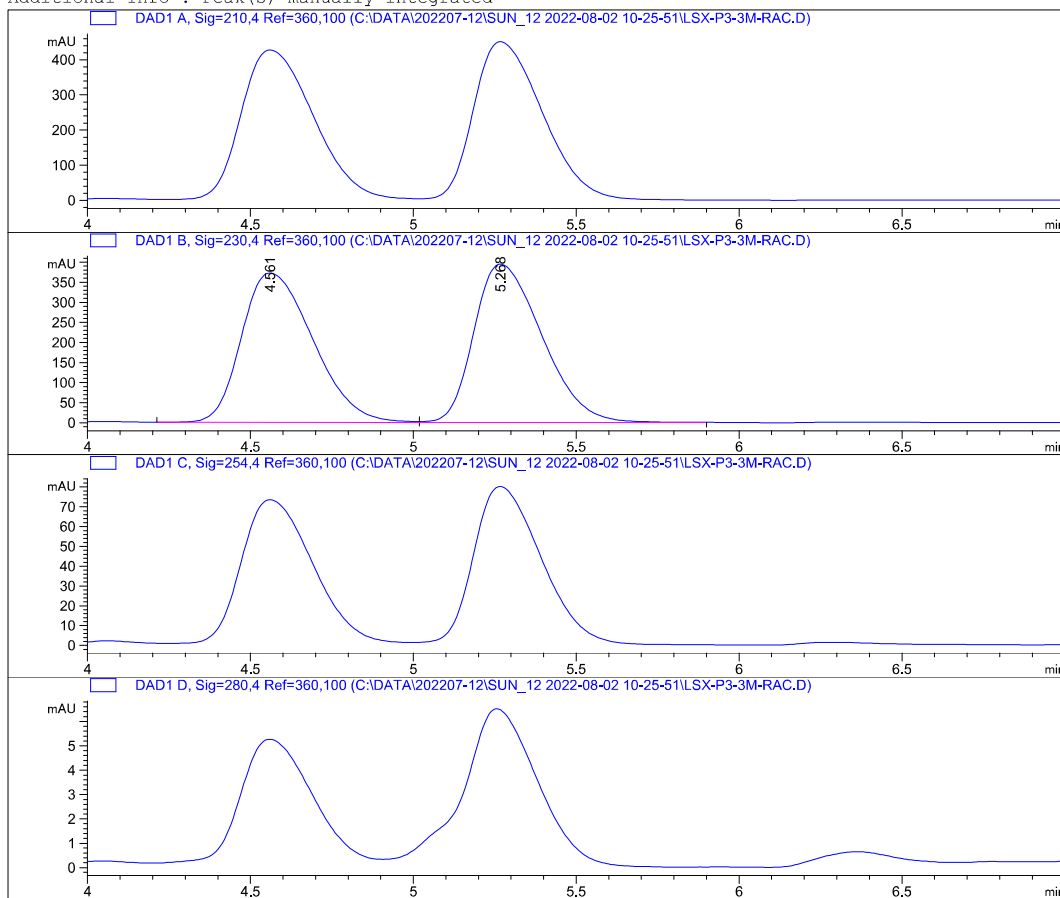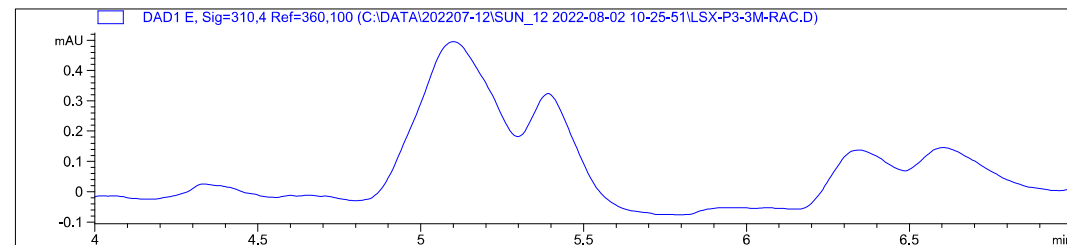

=====  
 Area Percent Report  
 =====

```

Sorted By      :      Signal
Multiplier    :      1.0000
Dilution      :      1.0000
Use Multiplier & Dilution Factor with ISTDs
  
```

Signal 1: DAD1 A, Sig=210,4 Ref=360,100

Signal 2: DAD1 B, Sig=230,4 Ref=360,100

| Peak # | RetTime [min] | Type | Width [min] | Area [mAU*s] | Height [mAU] | Area %  |
|--------|---------------|------|-------------|--------------|--------------|---------|
| 1      | 4.561         | VV   | 0.2414      | 5656.20166   | 371.97165    | 49.7169 |
| 2      | 5.268         | VB   | 0.2292      | 5720.62207   | 394.34897    | 50.2831 |

Totals :                    1.13768e4    766.32062

Signal 3: DAD1 C, Sig=254,4 Ref=360,100

Signal 4: DAD1 D, Sig=280,4 Ref=360,100

Signal 5: DAD1 E, Sig=310,4 Ref=360,100

=====  
 \*\*\* End of Report \*\*\*

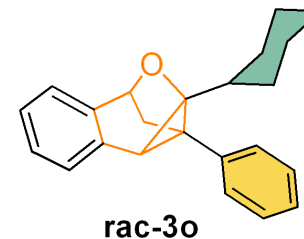

```

=====
Acq. Operator   :                               Seq. Line : 14
Acq. Instrument : Instrument 1                   Location   : 41
Injection Date  : 6/6/2022 7:43:36 am           Inj        : 1
                                                Inj Volume : 5.000 µl
Different Inj Volume from Sample Entry! Actual Inj Volume : 8.000 µl
Acq. Method    : C:\Chem32\1\DATA\SUN_12 2022-06-06 19-12-01\AD-02-30.M
Last changed   :                               (modified after loading)
Analysis Method : C:\Users\Public\Documents\ChemStation\1\Data\SUN\SUN 2024-03-13 17-26-47\OD-00
                                                -20.M (Sequence Method)
Last changed   : 13/3/2024 10:44:59 pm by SYSTEM
                                                (modified after loading)
Additional Info : Peak(s) manually integrated
  
```

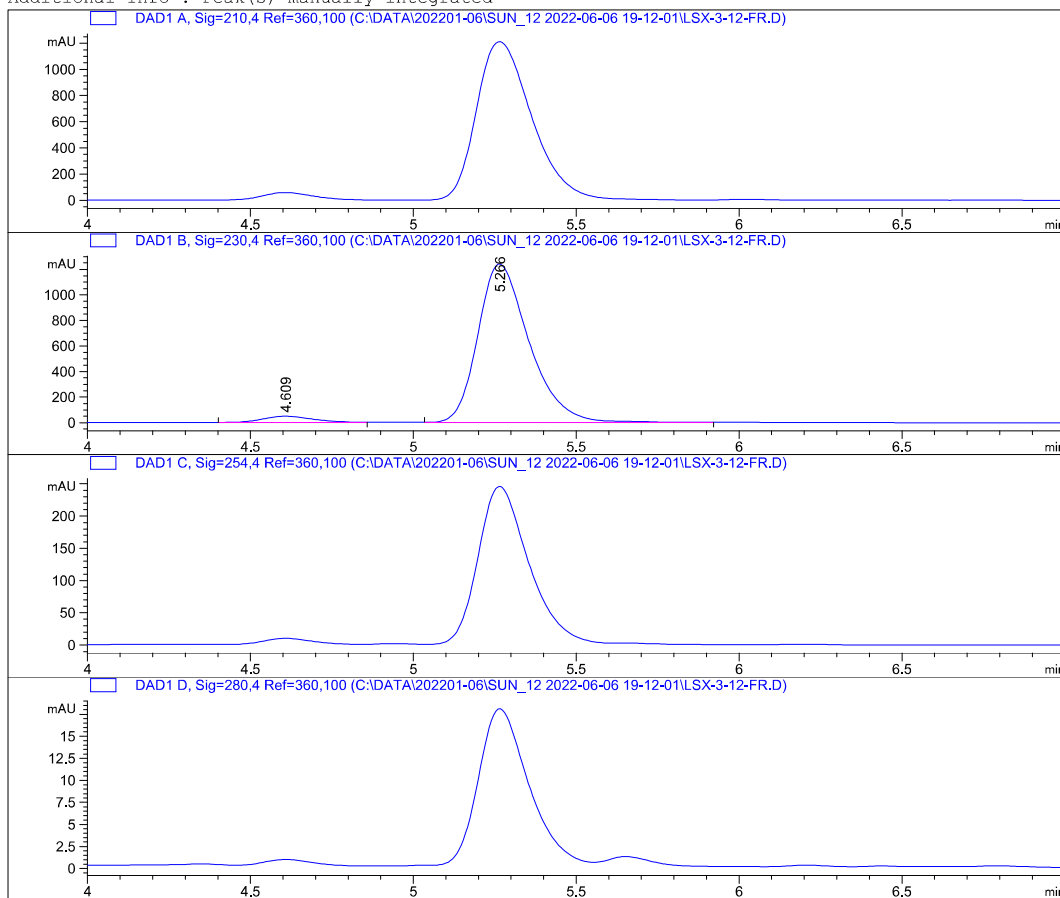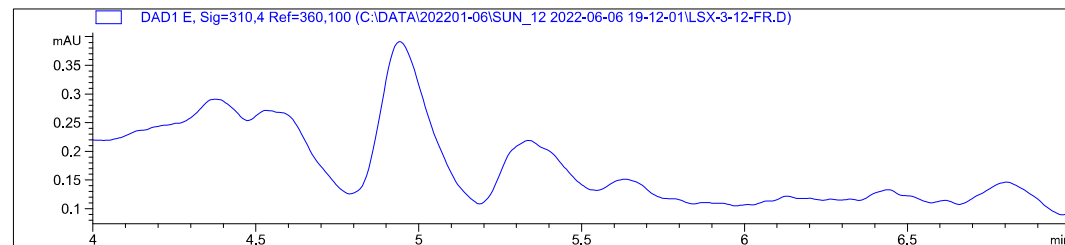

=====  
Area Percent Report  
=====

Sorted By : Signal  
Multiplier : 1.0000  
Dilution : 1.0000  
Use Multiplier & Dilution Factor with ISTDs

Signal 1: DAD1 A, Sig=210,4 Ref=360,100

Signal 2: DAD1 B, Sig=230,4 Ref=360,100

| Peak # | RetTime [min] | Type | Width [min] | Area [mAU*s] | Height [mAU] | Area %  |
|--------|---------------|------|-------------|--------------|--------------|---------|
| 1      | 4.609         | BV   | 0.1649      | 530.77295    | 48.80680     | 3.7515  |
| 2      | 5.266         | VB   | 0.1660      | 1.36176e4    | 1241.16309   | 96.2485 |

Totals : 1.41484e4 1289.96989

Signal 3: DAD1 C, Sig=254,4 Ref=360,100

Signal 4: DAD1 D, Sig=280,4 Ref=360,100

Signal 5: DAD1 E, Sig=310,4 Ref=360,100

=====  
\*\*\* End of Report \*\*\*

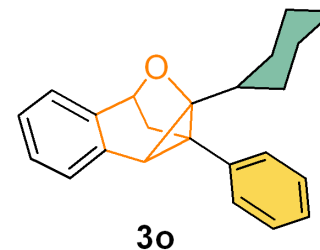

```
=====
Acq. Operator   : SYSTEM                Seq. Line :    7
Sample Operator : SYSTEM
Acq. Instrument : HPLC                 Location  :  PL-D-01
Injection Date  : 21/7/2024 3:54:36 pm  Inj       :    1
                                          Inj Volume: 2.000 µl
                                          Actual Inj Volume: 10.000 µl
Different Inj Volume from Sample Entry! Actual Inj Volume: 10.000 µl
Acq. Method    : C:\Users\Public\Documents\ChemStation\1\Data\SUN\SUN 2024-07-21 14-34-56
                \IC3-2-25.M
Last changed   : 2/7/2024 6:32:09 pm by SYSTEM
Analysis Method : C:\Users\Public\Documents\ChemStation\1\Data\SUN\SUN 2024-07-21 14-34-56
                \IC3-2-25.M (Sequence Method)
Last changed   : 22/7/2024 3:53:30 pm by SYSTEM
                (modified after loading)
Additional Info : Peak(s) manually integrated
=====
```

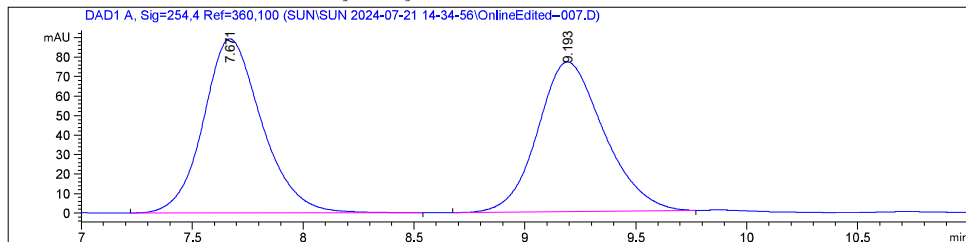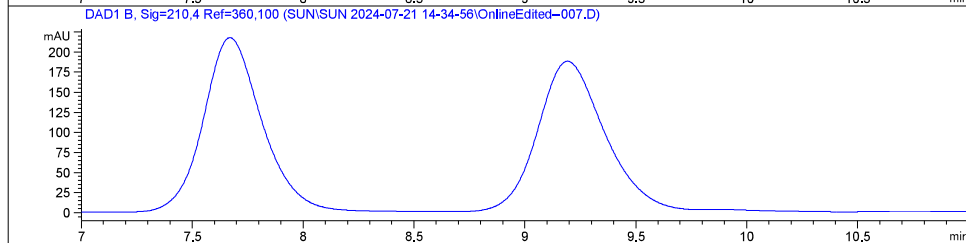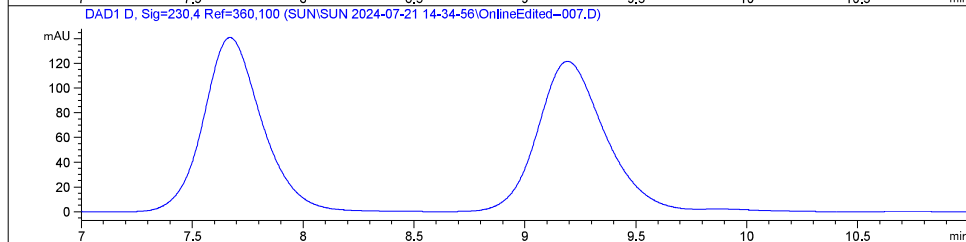

Area Percent Report

```
Sorted By      :      Signal
Multiplier     :      1.0000
Dilution       :      1.0000
Use Multiplier & Dilution Factor with ISTDs
```

Signal 1: DAD1 A, Sig=254,4 Ref=360,100

| Peak # | RetTime [min] | Type | Width [min] | Area [mAU*s] | Height [mAU] | Area %  |
|--------|---------------|------|-------------|--------------|--------------|---------|
| 1      | 7.671         | BB   | 0.2776      | 1639.43286   | 89.33002     | 50.6508 |
| 2      | 9.193         | BB   | 0.3157      | 1597.30408   | 76.77734     | 49.3492 |

Totals : 3236.73694 166.10736

Signal 2: DAD1 B, Sig=210,4 Ref=360,100

Signal 3: DAD1 D, Sig=230,4 Ref=360,100

\*\*\* End of Report \*\*\*

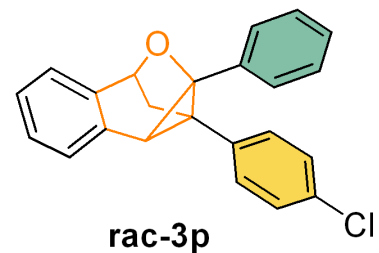

```

=====
Acq. Operator   : SYSTEM                      Seq. Line :    3
Sample Operator : SYSTEM
Acq. Instrument : HPLC                      Location  :  PL-D-01
Injection Date  : 21/7/2024 9:44:59 pm       Inj       :    1
                                                Inj Volume: 2.000 µl
Different Inj Volume from Sample Entry! Actual Inj Volume : 10.000 µl
Acq. Method     : C:\Users\Public\Documents\ChemStation\1\Data\SUN\SUN 2024-07-21 21-27-19
                  \IC3-2-25.M
Last changed    : 2/7/2024 6:32:09 pm by SYSTEM
Analysis Method : C:\Users\Public\Documents\ChemStation\1\Data\SUN\SUN 2024-07-21 21-27-19
                  \IC3-2-25.M (Sequence Method)
Last changed    : 22/7/2024 3:54:28 pm by SYSTEM
                  (modified after loading)
Additional Info  : Peak(s) manually integrated
  
```

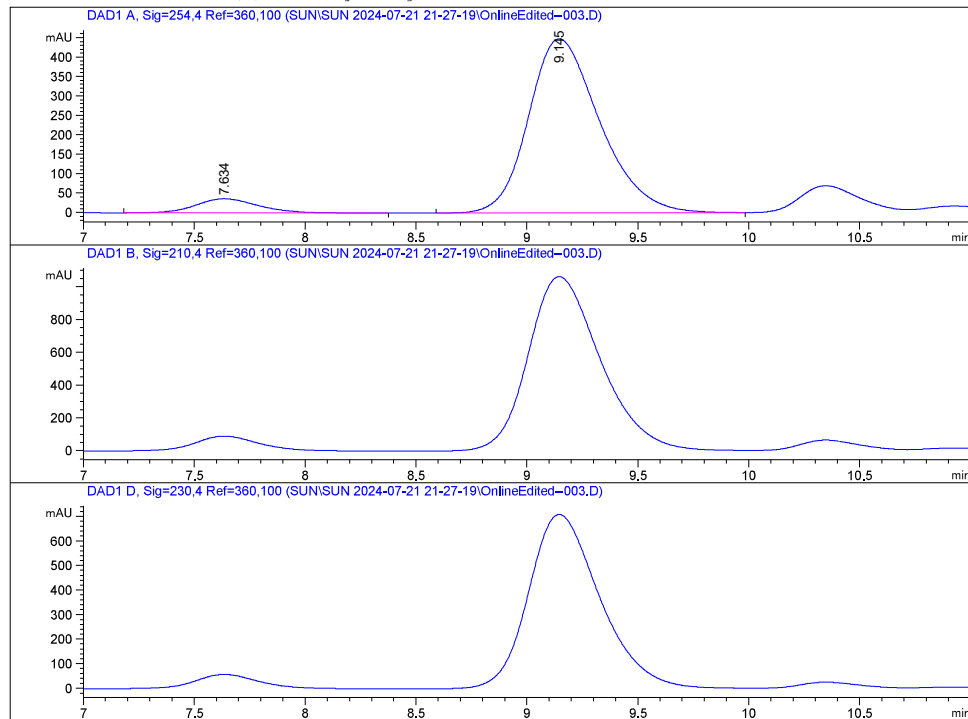

Area Percent Report

```

=====
Sorted By      :      Signal
Multiplier     :      1.0000
Dilution       :      1.0000
Use Multiplier & Dilution Factor with ISTDs
  
```

Signal 1: DAD1 A, Sig=254,4 Ref=360,100

| Peak #   | RetTime [min] | Type | Width [min] | Area [mAU*s] | Height [mAU] | Area %  |
|----------|---------------|------|-------------|--------------|--------------|---------|
| 1        | 7.634         | BB   | 0.2946      | 724.15308    | 36.62976     | 6.7459  |
| 2        | 9.145         | BB   | 0.3398      | 1.00105e4    | 447.76245    | 93.2541 |
| Totals : |               |      |             | 1.07346e4    | 484.39222    |         |

Signal 2: DAD1 B, Sig=210,4 Ref=360,100

Signal 3: DAD1 D, Sig=230,4 Ref=360,100

\*\*\* End of Report \*\*\*

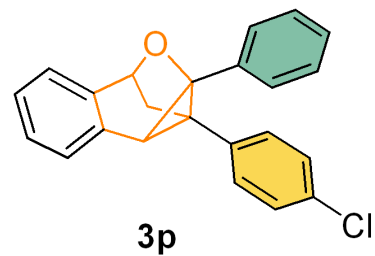

```
=====
Acq. Operator   : SYSTEM                      Seq. Line :    9
Sample Operator : SYSTEM
Acq. Instrument : HPLC                       Location  :  PL-D-03
Injection Date  : 21/7/2024 4:47:34 pm       Inj       :    1
                                          Inj Volume: 2.000 µl
Different Inj Volume from Sample Entry! Actual Inj Volume : 10.000 µl
Acq. Method     : C:\Users\Public\Documents\ChemStation\1\Data\SUN\SUN 2024-07-21 14-34-56
                  \IC3-2-25.M
Last changed    : 2/7/2024 6:32:09 pm by SYSTEM
Analysis Method : C:\Users\Public\Documents\ChemStation\1\Data\SUN\SUN 2024-07-21 14-34-56
                  \IC3-2-25.M (Sequence Method)
Last changed    : 22/7/2024 3:51:26 pm by SYSTEM
                  (modified after loading)
Additional Info  : Peak(s) manually integrated
=====
```

```
=====
Area Percent Report
=====
```

```
Sorted By       :      Signal
Multiplier      :      1.0000
Dilution        :      1.0000
Use Multiplier & Dilution Factor with ISTDs
```

Signal 1: DAD1 A, Sig=254,4 Ref=360,100

| Peak # | RetTime [min] | Type | Width [min] | Area [mAU*s] | Height [mAU] | Area %  |
|--------|---------------|------|-------------|--------------|--------------|---------|
| 1      | 7.354         | BB   | 0.2712      | 2371.44141   | 130.66690    | 49.6549 |
| 2      | 8.612         | BB   | 0.3101      | 2404.39990   | 117.79632    | 50.3451 |

Totals : 4775.84131 248.46322

Signal 2: DAD1 B, Sig=210,4 Ref=360,100

Signal 3: DAD1 D, Sig=230,4 Ref=360,100

```
=====
*** End of Report ***
=====
```

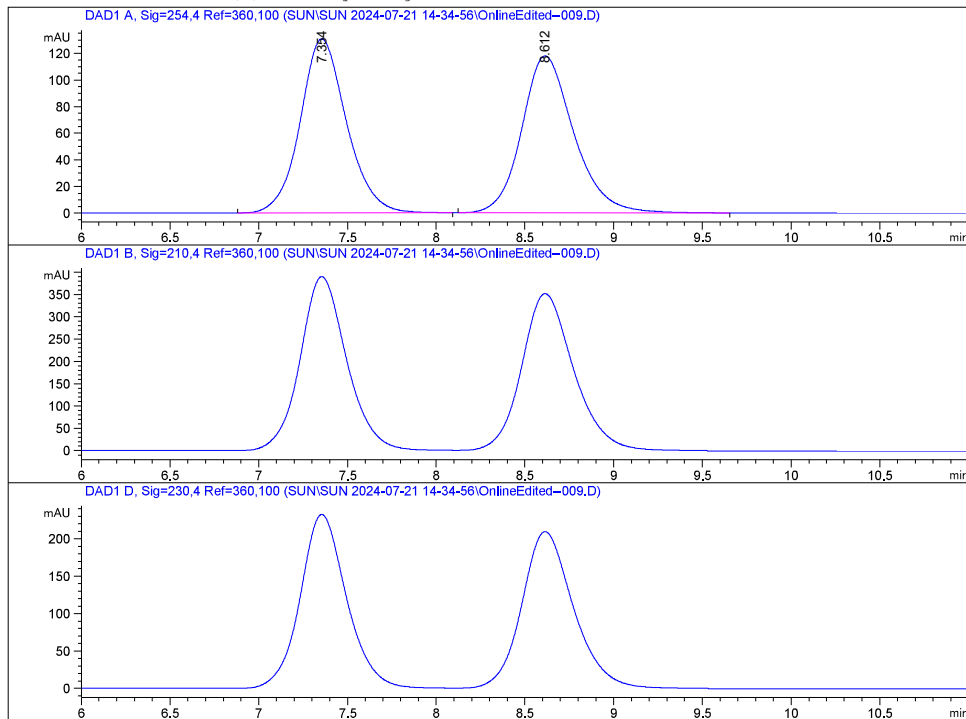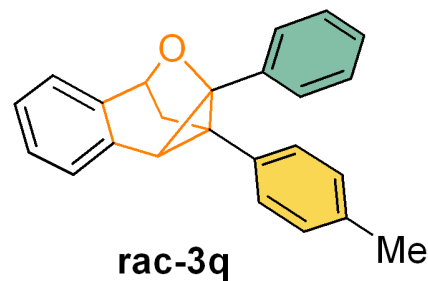



=====  
 Acq. Operator : SYSTEM                      Seq. Line : 2  
 Sample Operator : SYSTEM  
 Acq. Instrument : HPLC                      Location : PL-D-01  
 Injection Date : 22/7/2024 12:48:04 pm      Inj : 1  
                                                                                                                          Inj Volume : 2.000 µl  
 Different Inj Volume from Sample Entry! Actual Inj Volume : 8.000 µl  
 Acq. Method : C:\Users\Public\Documents\ChemStation\1\Data\SUN\SUN 2024-07-22 12-34-21  
                                                                                                                          \IC3-2-25.M  
 Last changed : 2/7/2024 6:32:09 pm by SYSTEM  
 Analysis Method : C:\Users\Public\Documents\ChemStation\1\Data\SUN\SUN 2024-07-22 12-34-21  
                                                                                                                          \IC3-2-25.M (Sequence Method)  
 Last changed : 22/7/2024 3:52:38 pm by SYSTEM  
                                                                                                                          (modified after loading)  
 Additional Info : Peak(s) manually integrated

=====  
 Area Percent Report  
 =====

Sorted By : Signal  
 Multiplier : 1.0000  
 Dilution : 1.0000  
 Use Multiplier & Dilution Factor with ISTDs

Signal 1: DAD1 A, Sig=254,4 Ref=360,100

| Peak # | RetTime [min] | Type | Width [min] | Area [mAU*s] | Height [mAU] | Area %  |
|--------|---------------|------|-------------|--------------|--------------|---------|
| 1      | 7.576         | BB   | 0.2970      | 1029.88721   | 52.81315     | 10.4569 |
| 2      | 8.914         | BB   | 0.3380      | 8819.01270   | 399.61432    | 89.5431 |

Totals :                                              9848.89990   452.42747

Signal 2: DAD1 B, Sig=210,4 Ref=360,100

Signal 3: DAD1 D, Sig=230,4 Ref=360,100

=====  
 \*\*\* End of Report \*\*\*  
 =====

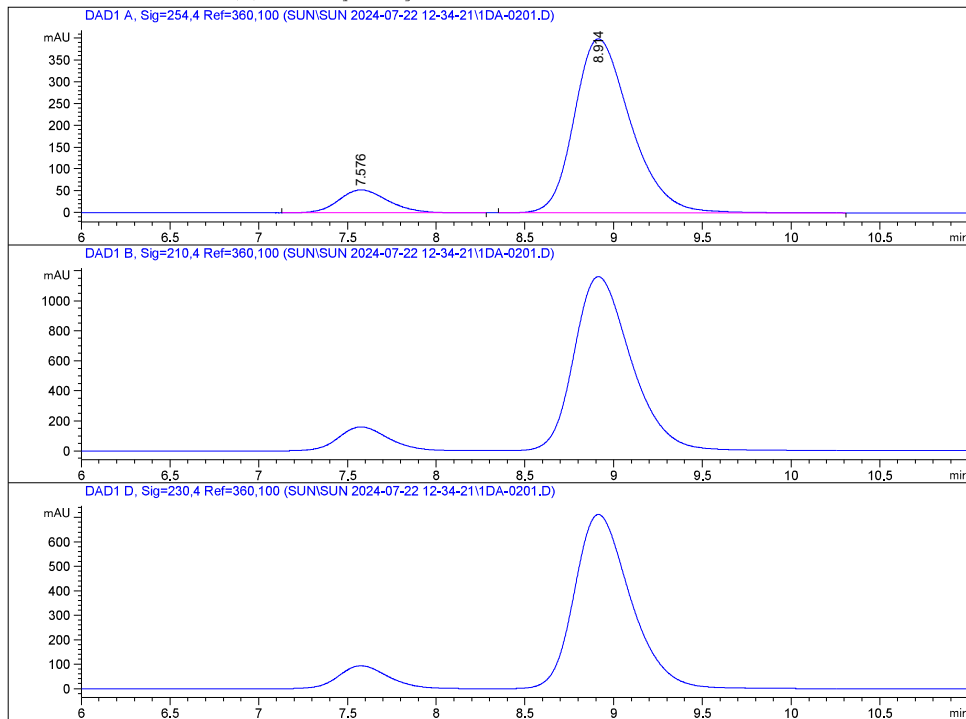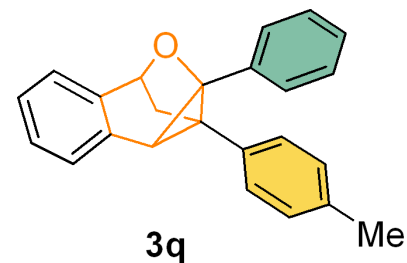

```

=====
Acq. Operator   : SYSTEM                Seq. Line :   15
Sample Operator : SYSTEM
Acq. Instrument : HPLC                  Location  :   Pl-D-03
Injection Date  : 7/7/2024 6:11:14 pm    Inj       :    1
                                           Inj Volume: 2.000 µl
                                           Actual Inj Volume: 8.000 µl
Different Inj Volume from Sample Entry!
Acq. Method    : C:\Users\Public\Documents\ChemStation\1\Data\SUN\SUN 2024-07-07 14-44-18
                                           \IC3-2-25.M
Last changed   : 2/7/2024 6:32:09 pm by SYSTEM
Analysis Method : C:\Users\Public\Documents\ChemStation\1\Data\SUN\SUN 2024-07-07 14-44-18
                                           \IC3-2-25.M (Sequence Method)
Last changed   : 22/7/2024 3:46:47 pm by SYSTEM
                                           (modified after loading)
Additional Info : Peak(s) manually integrated

```

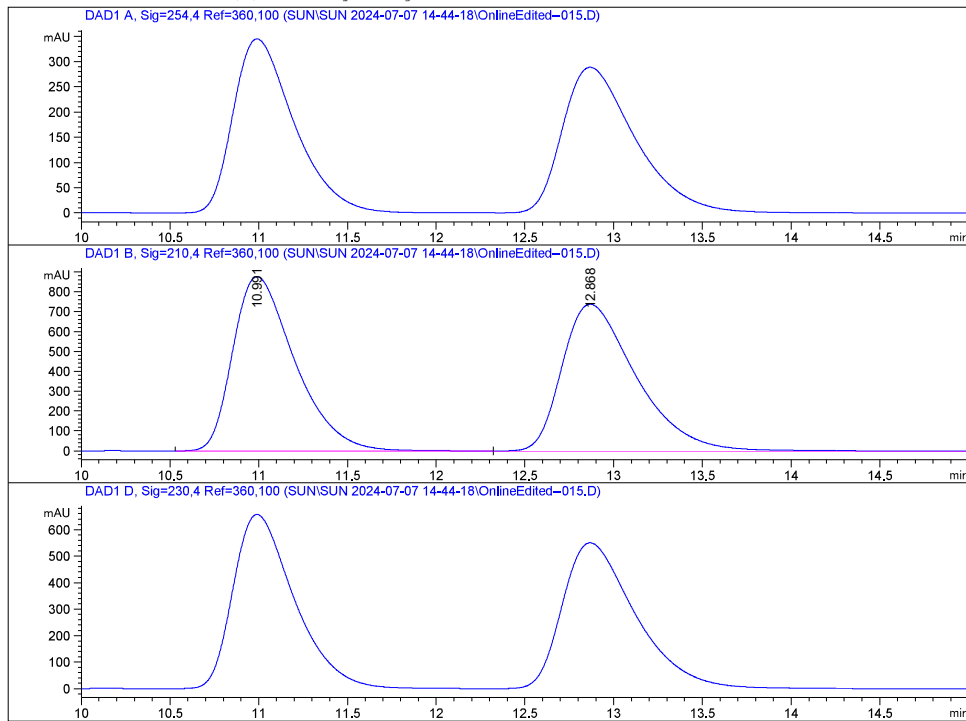

Area Percent Report

```

=====
Sorted By      :      Signal
Multiplier     :      1.0000
Dilution       :      1.0000
Use Multiplier & Dilution Factor with ISTDs

```

Signal 1: DAD1 A, Sig=254,4 Ref=360,100

Signal 2: DAD1 B, Sig=210,4 Ref=360,100

| Peak # | RetTime [min] | Type | Width [min] | Area [mAU*s] | Height [mAU] | Area %  |
|--------|---------------|------|-------------|--------------|--------------|---------|
| 1      | 10.991        | BB   | 0.3685      | 2.12142e4    | 876.14178    | 49.8608 |
| 2      | 12.868        | BB   | 0.4359      | 2.13327e4    | 737.73883    | 50.1392 |

Totals : 4.25469e4 1613.88062

Signal 3: DAD1 D, Sig=230,4 Ref=360,100

\*\*\* End of Report \*\*\*

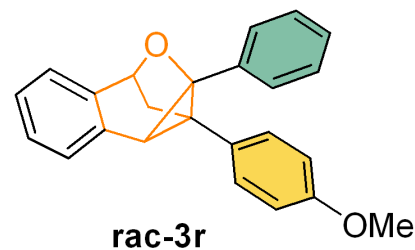

```

=====
Acq. Operator   : SYSTEM                 Seq. Line :    3
Sample Operator : SYSTEM
Acq. Instrument : HPLC                  Location  : PL-D-01
Injection Date  : 20/7/2024 3:23:26 pm   Inj       :    1
                                           Inj Volume: 2.000 µl
                                           Actual Inj Volume: 10.000 µl
Different Inj Volume from Sample Entry!
Acq. Method    : C:\Users\Public\Documents\ChemStation\1\Data\SUN\SUN 2024-07-20 14-53-17\IC3-2-25.M
Last changed   : 2/7/2024 6:32:09 pm by SYSTEM
Analysis Method : C:\Users\Public\Documents\ChemStation\1\Data\SUN\SUN 2024-07-20 14-53-17\IC3-2-25.M (Sequence Method)
Last changed   : 22/7/2024 3:39:01 pm by SYSTEM
                (modified after loading)
Additional Info : Peak(s) manually integrated
    
```

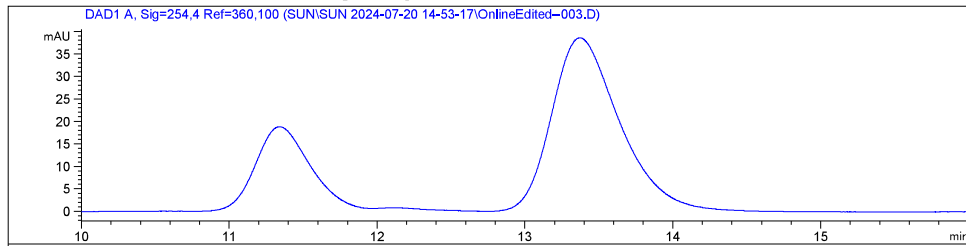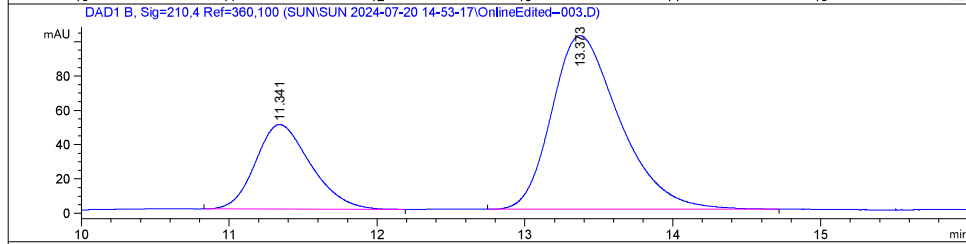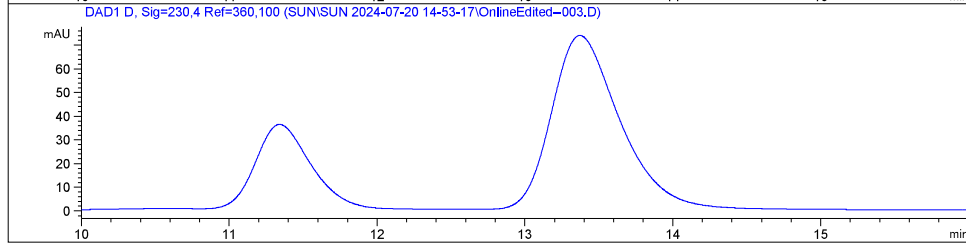

Area Percent Report

```

=====
Sorted By       : Signal
Multiplier     : 1.0000
Dilution       : 1.0000
Use Multiplier & Dilution Factor with ISTDs
    
```

Signal 1: DAD1 A, Sig=254,4 Ref=360,100

Signal 2: DAD1 B, Sig=210,4 Ref=360,100

| Peak # | RetTime [min] | Type | Width [min] | Area [mAU*s] | Height [mAU] | Area %  |
|--------|---------------|------|-------------|--------------|--------------|---------|
| 1      | 11.341        | BB   | 0.3718      | 1274.70825   | 49.27628     | 28.2194 |
| 2      | 13.373        | BB   | 0.4679      | 3242.43311   | 101.18215    | 71.7806 |

Totals : 4517.14136 150.45843

Signal 3: DAD1 D, Sig=230,4 Ref=360,100

\*\*\* End of Report \*\*\*

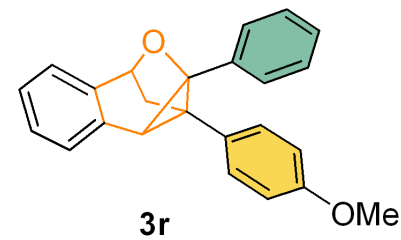

```

=====
Acq. Operator   : SYSTEM                      Seq. Line :    2
Acq. Instrument : LC1260                     Location  :   41
Injection Date  : 14/3/2024 10:55:26 pm      Inj       :    1
                                           Inj Volume: 5.000 µl
Different Inj Volume from Sample Entry! Actual Inj Volume : 3.000 µl
Acq. Method     : C:\Users\Public\Documents\ChemStation\1\Data\SUN\SUN 2024-03-14 22-42-40\OD-005-30-0.5.M
Last changed    : 14/3/2024 10:54:38 pm by SYSTEM
                                           (modified after loading)
Analysis Method : C:\Users\Public\Documents\ChemStation\1\Data\SUN\SUN 2024-03-14 22-42-40\OD-005-30-0.5.M (Sequence Method)
Last changed    : 16/3/2024 11:03:28 am by SYSTEM
                                           (modified after loading)
Additional Info  : Peak(s) manually integrated
  
```

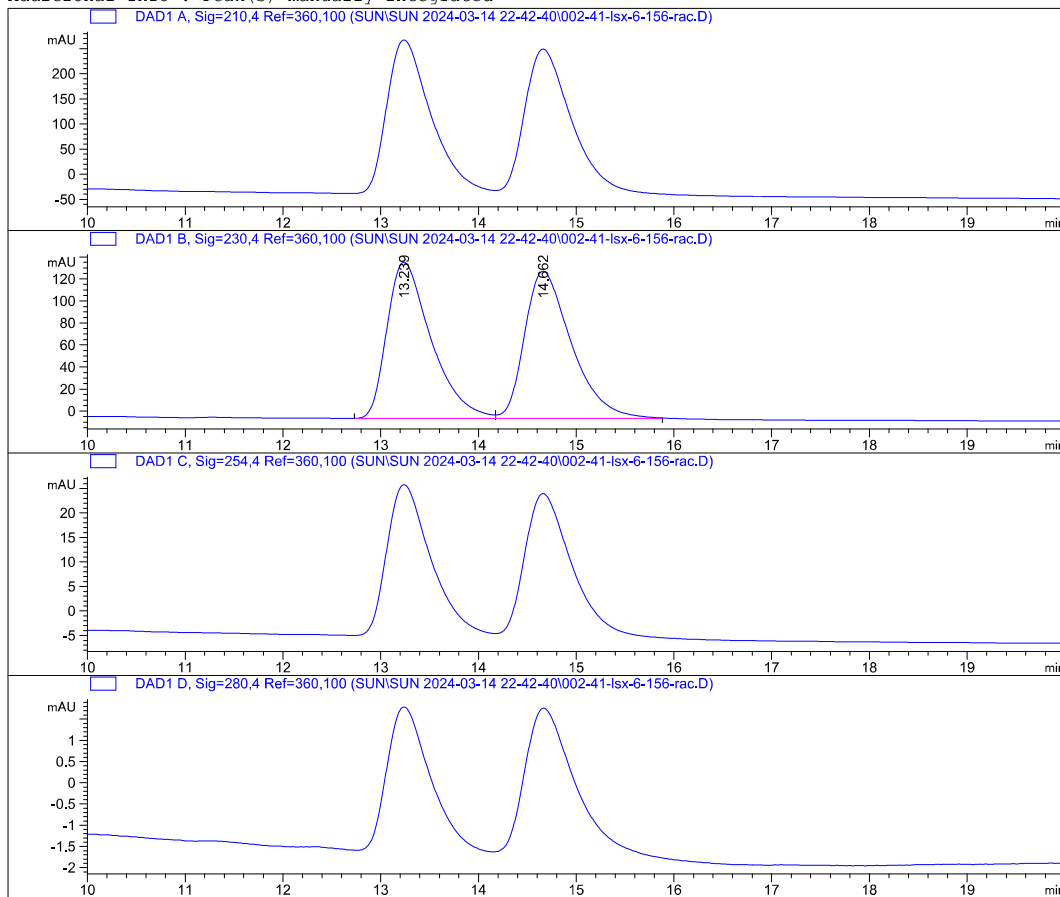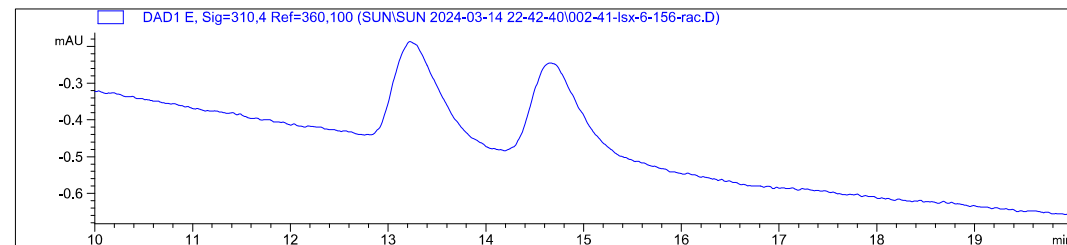

```

=====
Area Percent Report
=====
Sorted By      :      Signal
Multiplier    :      1.0000
Dilution      :      1.0000
Use Multiplier & Dilution Factor with ISTDs

Signal 1: DAD1 A, Sig=210,4 Ref=360,100
Signal 2: DAD1 B, Sig=230,4 Ref=360,100

Peak RetTime Type Width Area Height Area
# [min] [min] [mAU*s] [mAU] %
-----|-----|-----|-----|-----|-----
1 13.239 BV 0.4763 4445.55176 141.59248 49.9927
2 14.662 VB 0.5044 4446.84326 133.58446 50.0073
Totals : 8892.39502 275.17694

Signal 3: DAD1 C, Sig=254,4 Ref=360,100
Signal 4: DAD1 D, Sig=280,4 Ref=360,100
Signal 5: DAD1 E, Sig=310,4 Ref=360,100
=====
*** End of Report ***
  
```

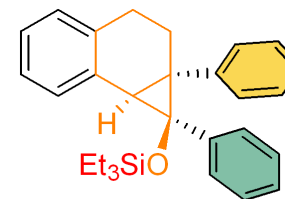

rac-4

```

=====
Acq. Operator   :                               Seq. Line :    2
Acq. Instrument : Instrument 1                   Location  :   41
Injection Date  : 23/10/2023 12:24:27 am       Inj       :    1
                                                Inj Volume: 5.000 µl
Different Inj Volume from Sample Entry! Actual Inj Volume : 3.000 µl
Acq. Method    : C:\Chem32\1\DATA\SUN_12 2023-10-23 15-11-35\OD-005-30-0.5.M
Last changed   :
Analysis Method: C:\Users\Public\Documents\ChemStation\1\Data\SUN\SUN 2024-03-14 15-51-32\OD-00
              -20.M (Sequence Method)
Last changed   : 14/3/2024 10:41:18 pm by SYSTEM
              (modified after loading)
Additional Info : Peak(s) manually integrated
  
```

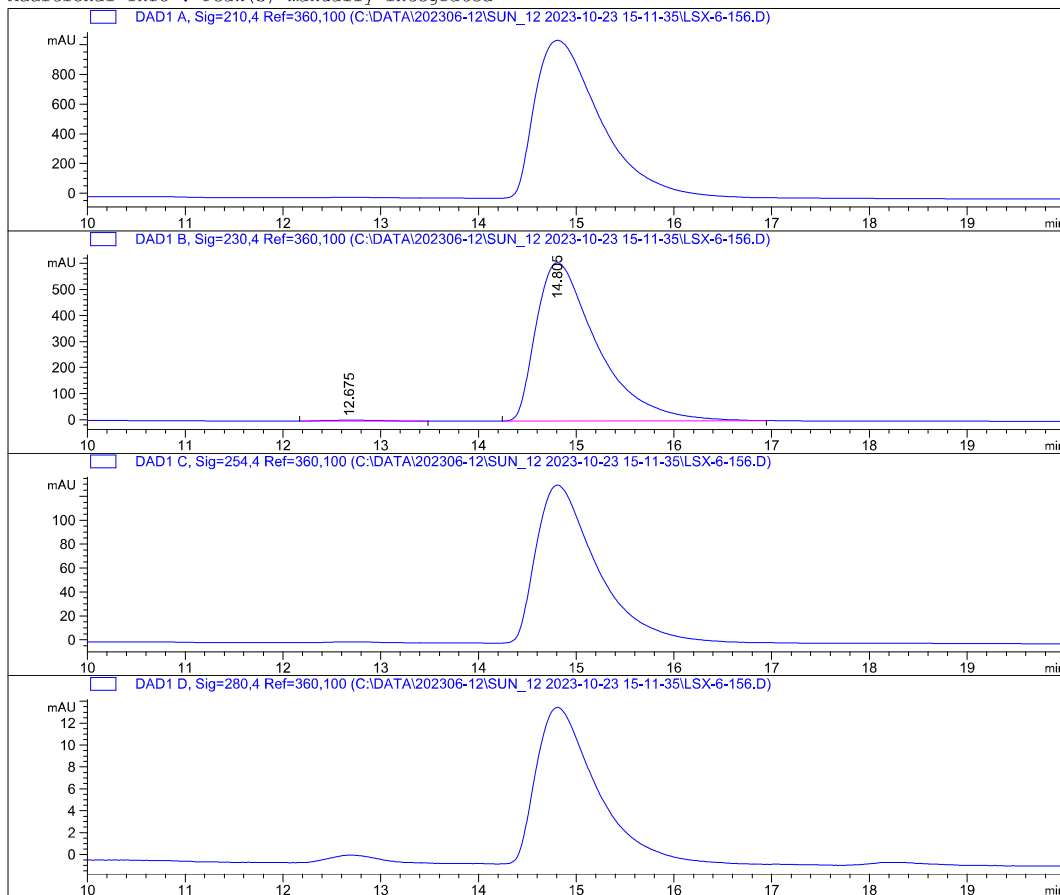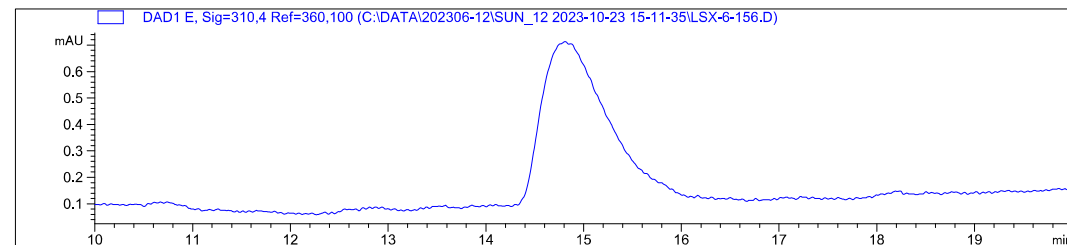

=====  
 Area Percent Report  
 =====

```

Sorted By      :      Signal
Multiplier    :      1.0000
Dilution      :      1.0000
Use Multiplier & Dilution Factor with ISTDs
  
```

Signal 1: DAD1 A, Sig=210,4 Ref=360,100

Signal 2: DAD1 B, Sig=230,4 Ref=360,100

| Peak # | RetTime [min] | Type | Width [min] | Area [mAU*s] | Height [mAU] | Area %  |
|--------|---------------|------|-------------|--------------|--------------|---------|
| 1      | 12.675        | BB   | 0.4218      | 114.07614    | 3.41453      | 0.4315  |
| 2      | 14.805        | BB   | 0.6554      | 2.63224e4    | 607.67755    | 99.5685 |

Totals : 2.64364e4 611.09208

Signal 3: DAD1 C, Sig=254,4 Ref=360,100

Signal 4: DAD1 D, Sig=280,4 Ref=360,100

Signal 5: DAD1 E, Sig=310,4 Ref=360,100

=====  
 \*\*\* End of Report \*\*\*

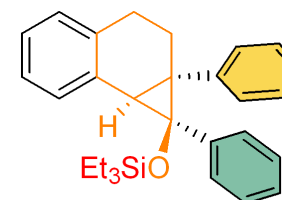

```

=====
Acq. Operator   : SYSTEM                      Seq. Line :    6
Sample Operator : SYSTEM
Acq. Instrument : HPLC                      Location  :  PL-D-01
Injection Date  : 13/7/2024 11:49:44 pm      Inj       :    1
                                           Inj Volume: 2.000 µl
Different Inj Volume from Sample Entry! Actual Inj Volume : 5.000 µl
Acq. Method     : C:\Users\Public\Documents\ChemStation\1\Data\SUN\SUN 2024-07-13 22-12-06
                  \IC3-2-25.M
Last changed    : 2/7/2024 6:32:09 pm by SYSTEM
Analysis Method : C:\Users\Public\Documents\ChemStation\1\Data\SUN\SUN 2024-07-13 22-12-06
                  \IC3-2-25.M (Sequence Method)
Last changed    : 22/7/2024 9:45:20 pm by SYSTEM
                  (modified after loading)
Additional Info  : Peak(s) manually integrated
  
```

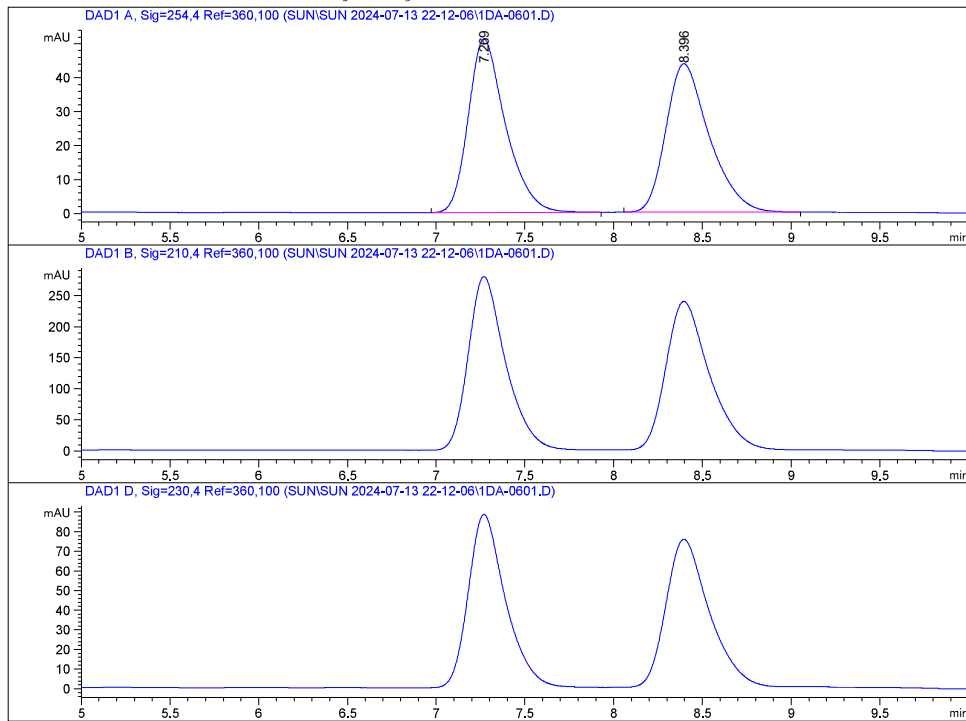

Area Percent Report

```

=====
Sorted By      :      Signal
Multiplier     :      1.0000
Dilution       :      1.0000
Use Multiplier & Dilution Factor with ISTDs
  
```

Signal 1: DAD1 A, Sig=254,4 Ref=360,100

| Peak # | RetTime [min] | Type | Width [min] | Area [mAU*s] | Height [mAU] | Area %  |
|--------|---------------|------|-------------|--------------|--------------|---------|
| 1      | 7.269         | BB   | 0.2164      | 745.83508    | 51.21305     | 50.1220 |
| 2      | 8.396         | BB   | 0.2479      | 742.20300    | 43.76320     | 49.8780 |

Totals : 1488.03809 94.97625

Signal 2: DAD1 B, Sig=210,4 Ref=360,100

Signal 3: DAD1 D, Sig=230,4 Ref=360,100

\*\*\* End of Report \*\*\*

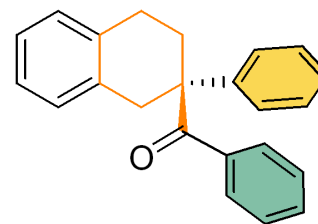

rac-5

```

=====
Acq. Operator   : SYSTEM                     Seq. Line :    2
Sample Operator : SYSTEM
Acq. Instrument : HPLC                      Location  :  PL-D-03
Injection Date  : 14/7/2024 5:58:36 pm      Inj       :    1
                                           Inj Volume: 2.000 µl
                                           Actual Inj Volume: 5.000 µl
Different Inj Volume from Sample Entry!
Acq. Method     : C:\Users\Public\Documents\ChemStation\1\Data\SUN\SUN 2024-07-14 17-45-29\IC3-2-25.M
Last changed    : 2/7/2024 6:32:09 pm by SYSTEM
Analysis Method : C:\Users\Public\Documents\ChemStation\1\Data\SUN\SUN 2024-07-14 17-45-29\IC3-2-25.M (Sequence Method)
Last changed    : 22/7/2024 3:44:09 pm by SYSTEM
                 (modified after loading)
Additional Info  : Peak(s) manually integrated
    
```

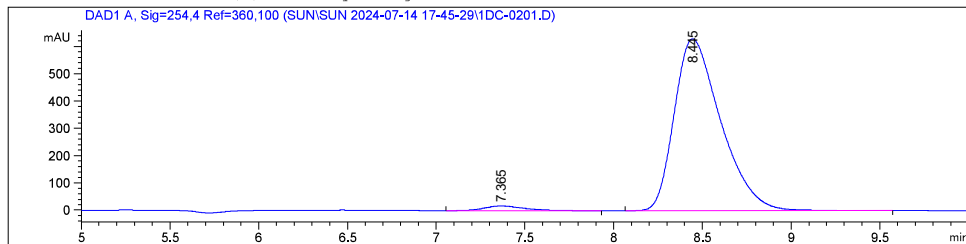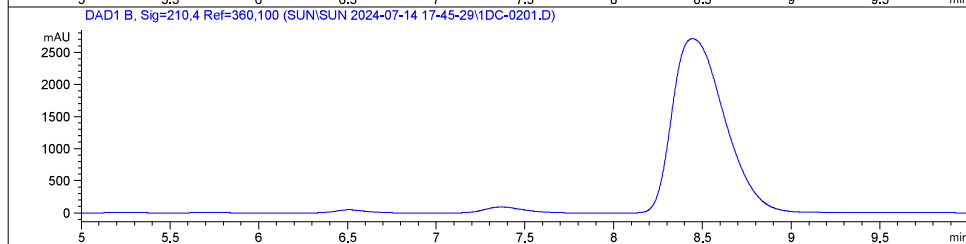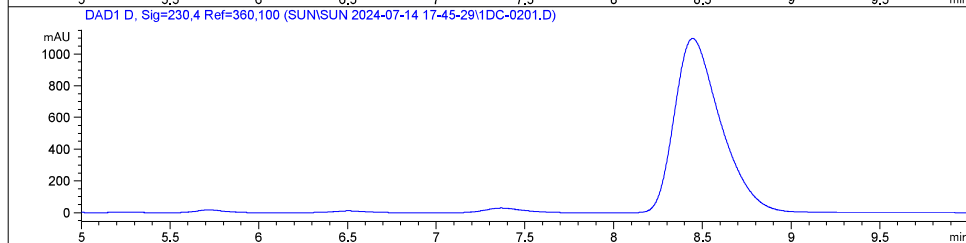

Area Percent Report

```

=====
Sorted By       : Signal
Multiplier      : 1.0000
Dilution        : 1.0000
Use Multiplier & Dilution Factor with ISTDs
    
```

Signal 1: DAD1 A, Sig=254,4 Ref=360,100

| Peak # | RetTime [min] | Type | Width [min] | Area [mAU*s] | Height [mAU] | Area %  |
|--------|---------------|------|-------------|--------------|--------------|---------|
| 1      | 7.365         | BB   | 0.2214      | 254.72859    | 16.99403     | 2.1785  |
| 2      | 8.445         | BB   | 0.2745      | 1.14379e4    | 629.57275    | 97.8215 |

Totals : 1.16926e4 646.56679

Signal 2: DAD1 B, Sig=210,4 Ref=360,100

Signal 3: DAD1 D, Sig=230,4 Ref=360,100

\*\*\* End of Report \*\*\*

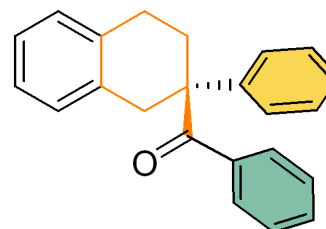

5
